# Supplementary material for: Prognostic and therapeutic value of disruptor of telomeric silencing-1-like (DOT1L) expression in patients with ovarian cancer
Source: J Hematol Oncol. 2017 Jan 23;10:29. doi: 10.1186/s13045-017-0400-8 (PMC5259947; doi:10.1186/s13045-017-0400-8)
Supplement: Additional file 7: — Possible target genes of DOT1L analyzed from DOT1L ChIP-seq. (XLSX 854 kb) [file 13045_2017_400_MOESM7_ESM.xlsx]

## Sheet: DOT1L ChIP-seq
PeakID (cmd=peaks.txt hg19)	Chr	Start	End	Strand	Peak Score	Focus Ratio/Region Size	Annotation	Detailed Annotation	Distance to TSS	绝对值Distance to TSS	Nearest PromoterID	Entrez ID	Nearest Unigene	Nearest Refseq	Nearest Ensembl	Gene Name	Gene Name	Gene Alias	Gene Description	Gene Type	Normalized Tag Count	focus ratio	findPeaks Score	Total Tags	Control Tags (normalized to IP Experiment)	Fold Change vs Control	p-value vs Control	Fold Change vs Local	p-value vs Local	Clonal Fold Change
chr4-297	chr4	165226549	165226691	+	4.7	0.714	intron (NM_001166373, intron 1 of 7)	intron (NM_001166373, intron 1 of 7)	77787	77787	NM_001166373	55016	Hs.608487	NM_001166373	ENSG00000145416	42064	42064	MARCH-I|RNF171	membrane-associated ring finger (C3HC4) 1, E3 ubiquitin protein ligase	protein-coding	4.7	0.714	10	10	2	4.94	5.11e-05	7.71	1.14e-06	0.97
chr1-725	chr1	220925025	220925165	+	4.8	0.692	intron (NM_017898, intron 1 of 7)	intron (NM_017898, intron 1 of 7)	3419	3419	NM_017898	54996	Hs.369042	NM_017898	ENSG00000117791	42065	42065	MOSC2|RP11-270A6.1	mitochondrial amidoxime reducing component 2	protein-coding	4.8	0.692	9	9	1.8	5.09	9.58e-05	5.24	7.76e-05	0.97
chr5-4446	chr5	16217221	16217361	+	4.8	0.9	Intergenic	Intergenic	-37394	37394	NM_001102562	441061	Hs.662216	NM_001102562	ENSG00000183654	42074	42074	MARCH-XI	membrane-associated ring finger (C3HC4) 11	protein-coding	4.8	0.9	9	9	1.8	5.09	9.58e-05	5.2	8.25e-05	0.97
chr5-3386	chr5	132117800	132117940	+	4.8	0.714	Intergenic	HAL1b|LINE|L1	-4309	4309	NM_001098813	23176	Hs.522057	NM_001098811	ENSG00000164402	42255	42255	2015-09-02	septin 8	protein-coding	4.8	0.714	10	9	1.8	5.09	9.58e-05	7.2	6.69e-06	0.97
chr9-395	chr9	118245837	118245977	+	4.8	0.75	Intergenic	L1M4|LINE|L1	341810	341810	NM_017418	50514	Hs.148841	NM_017418	ENSG00000173077	42339	42339	CTS9	deleted in esophageal cancer 1	protein-coding	4.8	0.75	9	9	1.8	5.09	9.58e-05	9.19	8.6e-07	0.97
chr2-243	chr2	69873414	69873556	+	4.7	0.846	Intergenic	Intergenic	-2508	2508	NM_014911	22848	Hs.468878	NM_014911	ENSG00000115977	AAK1	AAK1	-	AP2 associated kinase 1	protein-coding	4.7	0.846	10	10	2	4.94	5.11e-05	6.09	8.92e-06	0.97
chr20-113	chr20	34878700	34878840	+	5.8	0.688	Intergenic	Tigger3b|DNA|TcMar-Tigger	54323	54323	NM_015511	25980	Hs.11314	NM_015511	ENSG00000131043	AAR2	AAR2	C20orf4|bA234K24.2	AAR2 splicing factor homolog (S. cerevisiae)	protein-coding	5.8	0.688	11	11	2	5.53	7.92e-06	6.4	2.02e-06	0.97
chr17-204	chr17	67209097	67209239	+	4.7	0.733	intron (NM_080282, intron 10 of 39)	L1PB1|LINE|L1	31788	31788	NM_080282	10349	Hs.25377	NM_080282	ENSG00000154263	ABCA10	ABCA10	EST698739	ATP-binding cassette, sub-family A (ABC1), member 10	protein-coding	4.7	0.733	11	10	2	4.94	5.11e-05	9.89	1.24e-07	0.97
chr7-231	chr7	48320190	48320330	+	4.8	0.667	intron (NM_152701, intron 18 of 61)	intron (NM_152701, intron 18 of 61)	109203	109203	NM_152701	154664	Hs.226568	NM_152701	ENSG00000179869	ABCA13	ABCA13	-	ATP-binding cassette, sub-family A (ABC1), member 13	protein-coding	4.8	0.667	9	9	1.8	5.09	9.58e-05	6.4	1.68e-05	0.97
chr2-81	chr2	169849039	169849181	+	6.1	0.652	intron (NM_003742, intron 8 of 27)	MIRb|SINE|MIR	38723	38723	NM_003742	8647	Hs.658439	NM_003742	ENSG00000073734	ABCB11	ABCB11	ABC16|BRIC2|BSEP|PFIC-2|PFIC2|PGY4|SPGP	ATP-binding cassette, sub-family B (MDR/TAP), member 11	protein-coding	6.1	0.652	13	13	2.4	5.38	1.66e-06	8.2	1.47e-08	0.96
chr16-126	chr16	16126475	16126615	+	4.8	0.917	intron (NM_004996, intron 5 of 30)	MIR|SINE|MIR	83111	83111	NM_004996	4363	Hs.391464	NM_004996	ENSG00000103222	ABCC1	ABCC1	ABC29|ABCC|GS-X|MRP|MRP1	ATP-binding cassette, sub-family C (CFTR/MRP), member 1	protein-coding	4.8	0.917	10	9	1.8	5.09	9.58e-05	10.18	3.74e-07	0.97
chr16-200	chr16	48193906	48194048	+	4.7	0.769	Intergenic	Intergenic	-13296	13296	NM_033226	94160	Hs.410111	NM_033226	ENSG00000140798	ABCC12	ABCC12	MRP9	ATP-binding cassette, sub-family C (CFTR/MRP), member 12	protein-coding	4.7	0.769	10	10	2	4.94	5.11e-05	7.16	2.21e-06	0.97
chr21-32	chr21	43625797	43625937	+	4.8	0.917	intron (NM_207627, intron 2 of 15)	L1MDa|LINE|L1	5945	5945	NM_207628	9619	Hs.124649	NM_004915	ENSG00000160179	ABCG1	ABCG1	ABC8|WHITE1	ATP-binding cassette, sub-family G (WHITE), member 1	protein-coding	4.8	0.917	11	9	1.8	5.09	9.58e-05	9.19	8.6e-07	0.97
chr14-464	chr14	51365076	51365218	+	4.7	0.611	intron (NM_001206673, intron 9 of 12)	intron (NM_001206673, intron 9 of 12)	26269	26269	NM_181814	145447	Hs.271896	NM_181533	ENSG00000131969	ABHD12B	ABHD12B	BEM46L3|C14orf29|c14_5314	abhydrolase domain containing 12B	protein-coding	4.7	0.611	11	10	2	4.94	5.11e-05	5.42	2.37e-05	0.97
chr3-221	chr3	100747026	100747168	+	4.7	0.714	Intergenic	L1M5|LINE|L1	-34763	34763	NM_015429	25890	Hs.477015	NM_015429	ENSG00000154175	ABI3BP	ABI3BP	NESHBP|TARSH	ABI family, member 3 (NESH) binding protein	protein-coding	4.7	0.714	10	10	2	4.94	5.11e-05	5.74	1.48e-05	0.97
chr9-453	chr9	133591115	133591257	+	4.7	0.667	intron (NM_007313, intron 1 of 10)	intron (NM_007313, intron 1 of 10)	1918	1918	NM_007313	25	Hs.431048	NM_005157	ENSG00000097007	ABL1	ABL1	ABL|JTK7|bcr/abl|c-ABL|p150|v-abl	c-abl oncogene 1, non-receptor tyrosine kinase	protein-coding	4.7	0.667	10	10	2	4.94	5.11e-05	4.92	5.28e-05	0.97
chr10-206	chr10	116410523	116410663	+	4.8	0.75	intron (NM_001003407, intron 1 of 21)	intron (NM_001003407, intron 1 of 21)	7465	7465	NM_002313	3983	Hs.538331	NM_001003407	ENSG00000099204	ABLIM1	ABLIM1	ABLIM|LIMAB1|LIMATIN|abLIM-1	actin binding LIM protein 1	protein-coding	4.8	0.75	9	9	1.8	5.09	9.58e-05	9.06	9.65e-07	0.97
chr5-7032	chr5	148572436	148572576	+	4.8	0.692	intron (NM_014945, intron 3 of 23)	L1MC5|LINE|L1	51452	51452	NM_014945	22885	Hs.49688	NM_014945	ENSG00000173210	ABLIM3	ABLIM3	-	actin binding LIM protein family, member 3	protein-coding	4.8	0.692	9	9	1.8	5.09	9.58e-05	5.07	9.89e-05	0.97
chr17-305	chr17	35766283	35766425	+	4.7	0.556	promoter-TSS (NM_133439)	promoter-TSS (NM_133439)	548	548	NM_198834	31	Hs.160556	NM_198834	ENSG00000132142	ACACA	ACACA	ACAC|ACACAD|ACC|ACC1|ACCA	acetyl-CoA carboxylase alpha	protein-coding	4.7	0.556	10	10	2	4.94	5.11e-05	5.3	2.88e-05	0.97
chr1-309	chr1	226369224	226369364	+	5.3	0.632	intron (NM_022735, intron 1 of 7)	MIRb|SINE|MIR	5129	5129	NM_022735	64746	Hs.520207	NM_022735	ENSG00000182827	ACBD3	ACBD3	GCP60|GOCAP1|GOLPH1|PAP7	acyl-CoA binding domain containing 3	protein-coding	5.3	0.632	10	10	1.8	5.66	1.66e-05	6.64	4.22e-06	0.97
chr9-117	chr9	19404826	19404968	+	4.7	0.765	Intergenic	Intergenic	-4028	4028	NM_001010887	340485	Hs.41379	NM_001010887	ENSG00000177076	ACER2	ACER2	ALKCDase2|ASAH3L	alkaline ceramidase 2	protein-coding	4.7	0.765	11	10	2	4.94	5.11e-05	4.92	5.28e-05	0.97
chr11-30	chr11	76596915	76597057	+	5.6	0.682	intron (NM_018367, intron 1 of 10)	L2a|LINE|L2	25069	25069	NM_018367	55331	Hs.23862	NM_018367	ENSG00000078124	ACER3	ACER3	APHC|PHCA	alkaline ceramidase 3	protein-coding	5.6	0.682	13	12	2	5.93	1.53e-06	4.87	1.09e-05	0.96
chr17-167	chr17	40052977	40053119	+	5.1	0.75	intron (NM_001096, intron 13 of 28)	intron (NM_001096, intron 13 of 28)	22224	22224	NM_198830	47	Hs.387567	NM_001096	ENSG00000131473	ACLY	ACLY	ACL|ATPCL|CLATP	ATP citrate lyase	protein-coding	5.1	0.75	11	11	2.4	4.55	4.58e-05	10.61	1.45e-08	0.97
chr9-329	chr9	32117337	32117479	+	4.7	0.857	Intergenic	Intergenic	-267193	267193	NM_002197	48	Hs.567229	NM_002197	ENSG00000122729	ACO1	ACO1	ACONS|IREB1|IREBP|IREBP1|IRP1	aconitase 1, soluble	protein-coding	4.7	0.857	10	10	2	4.94	5.11e-05	6.68	4.05e-06	0.97
chr22-5	chr22	41864865	41865007	+	5.6	0.722	promoter-TSS (NM_032758)	promoter-TSS (NM_032758)	-193	193	NM_001098	50	Hs.643610	NM_001098	ENSG00000100412	ACO2	ACO2	ACONM|ICRD	aconitase 2, mitochondrial	protein-coding	5.6	0.722	12	12	2	5.93	1.53e-06	5.87	1.71e-06	0.96
chr20-307	chr20	44484542	44484682	+	4.8	0.857	intron (NM_005469, intron 1 of 5)	intron (NM_005469, intron 1 of 5)	1436	1436	NM_005469	10005	Hs.444776	NM_005469	ENSG00000101473	ACOT8	ACOT8	HNAACTE|PTE-1|PTE-2|PTE1|PTE2|hACTE-III|hTE	acyl-CoA thioesterase 8	protein-coding	4.8	0.857	10	9	1.8	5.09	9.58e-05	6.47	1.55e-05	0.97
chr2-93	chr2	111474729	111474869	+	5.3	0.917	Intergenic	Intergenic	-15351	15351	NM_001142807	55289	Hs.253320	NM_001105516	ENSG00000153093	ACOXL	ACOXL	-	acyl-CoA oxidase-like	protein-coding	5.3	0.917	11	10	1.8	5.66	1.66e-05	6.77	3.58e-06	0.97
chr17-395	chr17	48504772	48504914	+	4.7	0.625	intron (NM_025149, intron 1 of 15)	intron (NM_025149, intron 1 of 15)	1324	1324	NM_025149	80221	Hs.288959	NM_025149	ENSG00000167107	ACSF2	ACSF2	ACSMW|AVYV493	acyl-CoA synthetase family member 2	protein-coding	4.7	0.625	10	10	2	4.94	5.11e-05	5.18	3.47e-05	0.97
chr2-221	chr2	223708312	223708452	+	5.3	0.7	Intergenic	Intergenic	-17350	17350	NM_004457	2181	Hs.655772	NM_004457	ENSG00000123983	ACSL3	ACSL3	ACS3|FACL3|PRO2194	acyl-CoA synthetase long-chain family member 3	protein-coding	5.3	0.7	10	10	1.8	5.66	1.66e-05	4.96	4.97e-05	0.97
chrX-31	chrX	108958018	108958158	+	5.8	0.688	intron (NM_022977, intron 1 of 16)	Tigger3|DNA|TcMar-Tigger	18533	18533	NM_022977	2182	Hs.268785	NM_004458	ENSG00000068366	ACSL4	ACSL4	ACS4|FACL4|LACS4|MRX63|MRX68	acyl-CoA synthetase long-chain family member 4	protein-coding	5.8	0.688	11	11	1.8	6.22	2.63e-06	5.2	1.39e-05	0.97
chr20-38	chr20	33465082	33465224	+	6.6	0.682	intron (NM_018677, intron 1 of 17)	Charlie19a|DNA|hAT-Charlie	825	825	NM_001076552	55902	Hs.517034	NM_001076552	ENSG00000131069	ACSS2	ACSS2	ACAS2|ACECS|ACS|ACSA|dJ1161H23.1	acyl-CoA synthetase short-chain family member 2	protein-coding	6.6	0.682	14	14	2	6.92	3.37e-08	6	1.87e-07	0.96
chr5-6653	chr5	56977832	56977974	+	4.7	0.8	Intergenic	MLT1G|LTR|ERVL-MaLR	-199267	199267	NM_001017992	345651	Hs.482167	NM_001017992	ENSG00000169067	ACTBL2	ACTBL2	ACT	actin, beta-like 2	protein-coding	4.7	0.8	10	10	2	4.94	5.11e-05	5.1	3.92e-05	0.97
chr3-378	chr3	179277935	179278075	+	4.8	0.786	Intergenic	Intergenic	-2703	2703	NM_004301	86	Hs.435326	NM_004301	ENSG00000136518	ACTL6A	ACTL6A	ACTL6|ARPN-BETA|Arp4|BAF53A|INO80K	actin-like 6A	protein-coding	4.8	0.786	9	9	1.8	5.09	9.58e-05	8.68	1.5e-06	0.97
chr9-145	chr9	111599440	111599580	+	4.8	0.786	Intergenic	Intergenic	18765	18765	NM_006686	10880	Hs.534390	NM_006686	ENSG00000148156	ACTL7B	ACTL7B	Tact1	actin-like 7B	protein-coding	4.8	0.786	10	9	1.8	5.09	9.58e-05	6.47	1.55e-05	0.97
chr2-73	chr2	114673630	114673772	+	5.1	0.882	intron (NM_005721, intron 2 of 11)	intron (NM_005721, intron 2 of 11)	26164	26164	NM_005721	10096	Hs.433512	NM_005721	ENSG00000115091	ACTR3	ACTR3	ARP3	ARP3 actin-related protein 3 homolog (yeast)	protein-coding	5.1	0.882	13	11	2.4	4.55	4.58e-05	5.83	4.85e-06	0.97
chr20-21	chr20	37377784	37377924	+	6.3	0.708	intron (NM_024855, intron 1 of 8)	L2a|LINE|L2	757	757	NM_024855	79913	Hs.371585	NM_024855	ENSG00000101442	ACTR5	ACTR5	Arp5|INO80M	ARP5 actin-related protein 5 homolog (yeast)	protein-coding	6.3	0.708	14	12	1.8	6.79	3.83e-07	5.95	1.48e-06	0.96
chrX-302	chrX	127120803	127120943	+	4.8	0.588	Intergenic	L1MB2|LINE|L1	65509	65509	NM_138289	139741	Hs.680125	NM_138289	ENSG00000123165	ACTRT1	ACTRT1	AIP1|ARIP1|ARPT1|HSD27	actin-related protein T1	protein-coding	4.8	0.588	9	9	1.8	5.09	9.58e-05	6.15	2.28e-05	0.97
chr20-139	chr20	43272058	43272200	+	5.1	0.778	intron (NM_000022, intron 1 of 11)	MIRb|SINE|MIR	8247	8247	NM_000022	100	Hs.654536	NM_000022	ENSG00000196839	ADA	ADA	-	adenosine deaminase	protein-coding	5.1	0.778	12	11	2	5.44	9.23e-06	4.49	5.14e-05	0.97
chr5-7069	chr5	157038507	157038647	+	4.8	0.643	Intergenic	Intergenic	-35794	35794	NM_033274	8728	Hs.483944	NM_033274	ENSG00000135074	ADAM19	ADAM19	MADDAM|MLTNB	ADAM metallopeptidase domain 19	protein-coding	4.8	0.643	9	9	1.8	5.09	9.58e-05	6.15	2.28e-05	0.97
chr8-566	chr8	24065034	24065176	+	4.7	0.786	Intergenic	Intergenic	-86475	86475	NM_021777	10863	Hs.174030	NM_014265	ENSG00000042980	ADAM28	ADAM28	ADAM 28|ADAM23|MDC-L|MDC-Lm|MDC-Ls|MDCL|eMDC II|eMDCII	ADAM metallopeptidase domain 28	protein-coding	4.7	0.786	10	10	2	4.94	5.11e-05	5.6	1.82e-05	0.97
chr4-305	chr4	176151165	176151307	+	4.7	0.75	Intergenic	Intergenic	311727	311727	NM_014269	11086	Hs.126838	NM_001130703	ENSG00000168594	ADAM29	ADAM29	CT73|svph1	ADAM metallopeptidase domain 29	protein-coding	4.7	0.75	10	10	2	4.94	5.11e-05	7.31	1.84e-06	0.97
chr21-89	chr21	28260507	28260647	+	4.8	0.833	Intergenic	Intergenic	-42849	42849	NM_006988	9510	Hs.643357	NM_006988	ENSG00000154734	ADAMTS1	ADAMTS1	C3-C5|METH1	ADAM metallopeptidase with thrombospondin type 1 motif, 1	protein-coding	4.8	0.833	9	9	1.8	5.09	9.58e-05	7.73	3.82e-06	0.97
chr4-249	chr4	73402915	73403055	+	4.8	0.818	intron (NM_014243, intron 3 of 21)	L1M4c|LINE|L1	31531	31531	NM_014243	9508	Hs.590919	NM_014243	ENSG00000156140	ADAMTS3	ADAMTS3	ADAMTS-4	ADAM metallopeptidase with thrombospondin type 1 motif, 3	protein-coding	4.8	0.818	9	9	1.8	5.09	9.58e-05	10.18	3.74e-07	0.97
chr6-142	chr6	143689246	143689388	+	4.7	0.75	Intergenic	HAL1|LINE|L1	82524	82524	NM_182503	134637	Hs.709561	NM_182503	ENSG00000189007	ADAT2	ADAT2	DEADC1|TAD2|dJ20N2|dJ20N2.1	adenosine deaminase, tRNA-specific 2	protein-coding	4.7	0.75	11	10	2	4.94	5.11e-05	5.69	1.58e-05	0.97
chr1-34	chr1	33592440	33592582	+	5.6	0.824	Intergenic	MER53|DNA|hAT	45797	45797	NM_052998	113451	Hs.101807	NM_052998	ENSG00000142920	ADC	ADC	AZI2|ODC-p|ODC1L	arginine decarboxylase	protein-coding	5.6	0.824	13	12	2	5.93	1.53e-06	9.26	1.43e-08	0.96
chr1-781	chr1	227206847	227206987	+	4.8	0.714	intron (NM_003607, intron 31 of 35)	Tigger1|DNA|TcMar-Tigger	78979	78979	NM_020247	56997	Hs.118241	NM_020247	ENSG00000163050	ADCK3	ADCK3	ARCA2|CABC1|COQ10D4|COQ8|SCAR9	aarF domain containing kinase 3	protein-coding	4.8	0.714	9	9	1.8	5.09	9.58e-05	5.56	4.95e-05	0.97
chr7-58	chr7	45499391	45499531	+	5.8	0.857	Intergenic	Intergenic	-114664	114664	NM_021116	107	Hs.192215	NM_021116	ENSG00000164742	ADCY1	ADCY1	AC1	adenylate cyclase 1 (brain)	protein-coding	5.8	0.857	11	11	1.8	6.22	2.63e-06	12.45	2.66e-09	0.97
chr1-93	chr1	167892466	167892608	+	5.6	0.765	intron (NM_001143674, intron 3 of 5)	L1MB3|LINE|L1	-9084	9084	NM_018417	55811	Hs.320892	NM_001167749	ENSG00000143199	ADCY10	ADCY10	HCA2|RP1-313L4.2|SAC|SACI|Sacy	adenylate cyclase 10 (soluble)	protein-coding	5.6	0.765	12	12	2	5.93	1.53e-06	9.26	1.43e-08	0.96
chr3-138	chr3	186601407	186601547	+	4.8	0.917	Intergenic	L1MB8|LINE|L1	-27565	27565	NR_046662	100874095	Hs.638968	NR_046662		ADIPOQ-AS1	ADIPOQ-AS1	-	ADIPOQ antisense RNA 1	miscRNA	4.8	0.917	10	9	1.8	5.09	9.58e-05	10.18	3.74e-07	0.97
chr12-13	chr12	1863619	1863759	+	5.8	0.846	intron (NM_024551, intron 2 of 7)	intron (NM_024551, intron 2 of 7)	63442	63442	NM_024551	79602	Hs.371642	NM_024551	ENSG00000006831	ADIPOR2	ADIPOR2	ACDCR2|PAQR2	adiponectin receptor 2	protein-coding	5.8	0.846	11	11	1.8	6.22	2.63e-06	9.93	2.8e-08	0.97
chr10-163	chr10	75983348	75983488	+	4.8	0.818	intron (NM_001202449, intron 2 of 9)	intron (NM_001202449, intron 2 of 9)	47171	47171	NM_001202449	132	Hs.656586	NM_001123	ENSG00000156110	ADK	ADK	AK	adenosine kinase	protein-coding	4.8	0.818	9	9	1.8	5.09	9.58e-05	10.18	3.74e-07	0.97
chr5-3427	chr5	159277634	159277774	+	4.8	0.857	Intergenic	Intergenic	-66036	66036	NM_000679	147	Hs.368632	NM_000679	ENSG00000170214	ADRA1B	ADRA1B	ADRA1|ALPHA1BAR	adrenoceptor alpha 1B	protein-coding	4.8	0.857	10	9	1.8	5.09	9.58e-05	8.02	2.84e-06	0.97
chr5-3544	chr5	148211181	148211323	+	5.1	0.737	Intergenic	Intergenic	5096	5096	NM_000024	154	Hs.2551	NM_000024	ENSG00000169252	ADRB2	ADRB2	ADRB2R|ADRBR|B2AR|BAR|BETA2AR	adrenoceptor beta 2, surface	protein-coding	5.1	0.737	11	11	2.4	4.55	4.58e-05	4.66	3.74e-05	0.97
chr1-324	chr1	244615813	244615955	+	4.7	0.611	promoter-TSS (NM_001126)	promoter-TSS (NM_001126)	-448	448	NM_001126	159	Hs.498313	NM_001126	ENSG00000035687	ADSS	ADSS	ADEH|ADSS 2	adenylosuccinate synthase	protein-coding	4.7	0.611	11	10	2	4.94	5.11e-05	5.26	3.06e-05	0.97
chr12-14	chr12	19592010	19592152	+	5.6	0.667	promoter-TSS (NM_153207)	promoter-TSS (NM_153207)	-527	527	NM_001114176	121536	Hs.126497	NM_001114176	ENSG00000139154	AEBP2	AEBP2	-	AE binding protein 2	protein-coding	5.6	0.667	12	12	2	5.93	1.53e-06	9.06	1.81e-08	0.96
chr5-7033	chr5	148685410	148685550	+	4.8	0.818	intron (NM_152406, intron 5 of 18)	(CA)n|Simple_repeat|Simple_repeat	34079	34079	NM_152406	134265	Hs.483793	NM_001146337	ENSG00000157510	AFAP1L1	AFAP1L1	-	actin filament associated protein 1-like 1	protein-coding	4.8	0.818	9	9	1.8	5.09	9.58e-05	10.18	3.74e-07	0.97
chr17-380	chr17	76194966	76195106	+	4.8	0.909	intron (NM_001010982, intron 2 of 10)	intron (NM_001010982, intron 2 of 10)	11638	11638	NR_027083	125061	Hs.558614	NM_001010982	ENSG00000183077	AFMID	AFMID	KF	arylformamidase	protein-coding	4.8	0.909	9	9	1.8	5.09	9.58e-05	10.18	3.74e-07	0.97
chr2-588	chr2	236226352	236226492	+	4.8	0.9	Intergenic	THE1D|LTR|ERVL-MaLR	-176311	176311	NM_001037131	116987	Hs.435039	NM_001037131	ENSG00000157985	AGAP1	AGAP1	AGAP-1|CENTG2|GGAP1|cnt-g2	ArfGAP with GTPase domain, ankyrin repeat and PH domain 1	protein-coding	4.8	0.9	9	9	1.8	5.09	9.58e-05	9.32	7.65e-07	0.97
chr7-202	chr7	15617606	15617746	+	4.8	0.818	Intergenic	Intergenic	-16036	16036	NM_001004320	392636	Hs.670634	NM_001004320	ENSG00000187546	AGMO	AGMO	TMEM195	alkylglycerol monooxygenase	protein-coding	4.8	0.818	9	9	1.8	5.09	9.58e-05	8.34	2.08e-06	0.97
chr4-267	chr4	84811891	84812031	+	4.8	0.692	Intergenic	L1MA10|LINE|L1	354491	354491	NM_032717	84803	Hs.99196	NM_001256421	ENSG00000138678	AGPAT9	AGPAT9	AGPAT8|GPAT3|LPAAT-theta|MAG1	1-acylglycerol-3-phosphate O-acyltransferase 9	protein-coding	4.8	0.692	9	9	1.8	5.09	9.58e-05	8.45	1.87e-06	0.97
chr9-361	chr9	88339363	88339503	+	4.8	0.75	intron (NM_015239, intron 1 of 25)	intron (NM_015239, intron 1 of 25)	17511	17511	NM_015239	23287	Hs.719980	NM_015239	ENSG00000135049	AGTPBP1	AGTPBP1	CCP1|NNA1	ATP/GTP binding protein 1	protein-coding	4.8	0.75	9	9	1.8	5.09	9.58e-05	10.18	3.74e-07	0.97
chr3-121	chr3	148476800	148476940	+	5.3	0.833	Intergenic	Intergenic	28903	28903	NM_032049	185	Hs.740357	NM_000685	ENSG00000144891	AGTR1	AGTR1	AG2S|AGTR1A|AGTR1B|AT1|AT1AR|AT1B|AT1BR|AT1R|AT2R1|AT2R1A|AT2R1B|HAT1R	angiotensin II receptor, type 1	protein-coding	5.3	0.833	10	10	1.8	5.66	1.66e-05	11.32	3.31e-08	0.97
chrX-101	chrX	115087530	115087670	+	5.3	0.714	Intergenic	L1MB7|LINE|L1	-214358	214358	NM_000686	186	Hs.405348	NM_000686	ENSG00000180772	AGTR2	AGTR2	AT2|ATGR2|MRX88	angiotensin II receptor, type 2	protein-coding	5.3	0.714	10	10	2	5.03	4.45e-05	7.91	9.13e-07	0.97
chr5-6045	chr5	35028833	35028975	+	4.7	0.769	intron (NM_031900, intron 7 of 13)	intron (NM_031900, intron 7 of 13)	19336	19336	NM_031900	64902	Hs.34494	NM_031900	ENSG00000113492	AGXT2	AGXT2	AGT2|DAIBAT	alanine--glyoxylate aminotransferase 2	protein-coding	4.7	0.769	10	10	2	4.94	5.11e-05	4.99	4.69e-05	0.97
chr4-123	chr4	109756230	109756370	+	5.3	0.706	intron (NR_045756, intron 27 of 35)	intron (NR_045756, intron 27 of 35)	-72065	72065	NM_001146590	64850	Hs.106576	NM_001146590	ENSG00000164089	AGXT2L1	AGXT2L1	-	alanine-glyoxylate aminotransferase 2-like 1	protein-coding	5.3	0.706	10	10	1.8	5.66	1.66e-05	11.32	3.31e-08	0.97
chr5-1600	chr5	177645991	177646131	+	5.8	0.857	intron (NM_153373, intron 8 of 12)	L1ME3F|LINE|L1	13742	13742	NM_153373	85007	Hs.248746	NM_032921	ENSG00000175309	AGXT2L2	AGXT2L2	-	alanine-glyoxylate aminotransferase 2-like 2	protein-coding	5.8	0.857	11	11	2	5.53	7.92e-06	7.67	3.57e-07	0.97
chr20-62	chr20	32898875	32899017	+	5.6	0.833	intron (NM_001161766, intron 1 of 9)	(CAA)n|Simple_repeat|Simple_repeat	662	662	NM_001161766	191	Hs.388004	NM_000687	ENSG00000101444	AHCY	AHCY	SAHH|adoHcyase	adenosylhomocysteinase	protein-coding	5.6	0.833	13	12	2	5.93	1.53e-06	4.53	2.22e-05	0.96
chr7-87	chr7	17273893	17274035	+	5.1	0.824	Intergenic	Intergenic	-64312	64312	NM_001621	196	Hs.171189	NM_001621	ENSG00000106546	AHR	AHR	bHLHe76	aryl hydrocarbon receptor	protein-coding	5.1	0.824	11	11	2	5.44	9.23e-06	5.62	6.87e-06	0.97
chr5-914	chr5	306750	306892	+	5.1	0.929	exon (NM_001267556, exon 4 of 6)	exon (NM_001267556, exon 4 of 6)	2530	2530	NM_001242412	57491	Hs.50823	NM_001242412	ENSG00000063438	AHRR	AHRR	AHH|AHHR|bHLHe77	aryl-hydrocarbon receptor repressor	protein-coding	5.1	0.929	12	11	2.4	4.55	4.58e-05	6.16	2.91e-06	0.97
chr12-21	chr12	8774652	8774794	+	5.1	0.917	Intergenic	L1M3|LINE|L1	-9281	9281	NM_020661	57379	Hs.149342	NM_020661	ENSG00000111732	AICDA	AICDA	AID|ARP2|CDA2|HIGM2	activation-induced cytidine deaminase	protein-coding	5.1	0.917	11	11	2	5.44	9.23e-06	10.87	1.13e-08	0.97
chr22-20	chr22	21296692	21296832	+	4.8	0.833	intron (NM_005207, intron 2 of 2)	L1MB4|LINE|L1	-22656	22656	NM_001018060	150209	Hs.723246	NM_001018060	ENSG00000183773	AIFM3	AIFM3	AIFL	apoptosis-inducing factor, mitochondrion-associated, 3	protein-coding	4.8	0.833	9	9	1.8	5.09	9.58e-05	8.13	2.56e-06	0.97
chr6-37	chr6	106973155	106973295	+	6.3	0.684	exon (NM_001624, exon 4 of 20)	exon (NM_001624, exon 4 of 20)	13495	13495	NM_001624	202	Hs.741239	NM_001624	ENSG00000112297	AIM1	AIM1	CRYBG1|ST4	absent in melanoma 1	protein-coding	6.3	0.684	12	12	2	6.03	1.29e-06	6.71	4.34e-07	0.96
chr1-375	chr1	65630524	65630666	+	4.7	0.714	intron (NM_203464, intron 2 of 5)	L2c|LINE|L2	16745	16745	NM_013410	205	Hs.10862	NM_001005353	ENSG00000162433	AK4	AK4	AK3|AK3L1|AK3L2	adenylate kinase 4	protein-coding	4.7	0.714	10	10	2	4.94	5.11e-05	7.63	1.26e-06	0.97
chr17-46	chr17	19844167	19844307	+	5.8	0.636	exon (NM_007202, exon 7 of 15)	exon (NM_007202, exon 7 of 15)	36932	36932	NM_007202	11216	Hs.642676	NM_007202	ENSG00000108599	AKAP10	AKAP10	AKAP-10|D-AKAP-2|D-AKAP2|PRKA10	A kinase (PRKA) anchor protein 10	protein-coding	5.8	0.636	11	11	1.8	6.22	2.63e-06	5.38	1.02e-05	0.97
chr15-31	chr15	85934083	85934223	+	5.8	0.786	intron (NM_006738, intron 1 of 36)	L2a|LINE|L2	10306	10306	NM_006738	11214	Hs.710656	NM_001270546	ENSG00000170776	AKAP13	AKAP13	AKAP-13|AKAP-Lbc|ARHGEF13|BRX|HA-3|Ht31|LBC|PRKA13|PROTO-LB|PROTO-LBC|c-lbc|p47	A kinase (PRKA) anchor protein 13	protein-coding	5.8	0.786	11	11	1.8	6.22	2.63e-06	8.24	1.77e-07	0.97
chr9-147	chr9	112703720	112703860	+	4.8	0.75	intron (NM_147150, intron 6 of 9)	L2|LINE|L2	-107088	107088	NM_001004065	11217	Hs.591908	NM_001004065	ENSG00000241978	AKAP2	AKAP2	AKAP-2|AKAPKL|PRKA2	A kinase (PRKA) anchor protein 2	protein-coding	4.8	0.75	10	9	1.8	5.09	9.58e-05	10.18	3.74e-07	0.97
chr14-301	chr14	32788966	32789106	+	4.8	0.769	Intergenic	Intergenic	-9443	9443	NM_004274	9472	Hs.509083	NM_004274	ENSG00000151320	AKAP6	AKAP6	ADAP100|ADAP6|AKAP100|PRKA6|mAKAP	A kinase (PRKA) anchor protein 6	protein-coding	4.8	0.769	10	9	1.8	5.09	9.58e-05	5.71	4.05e-05	0.97
chr6-248	chr6	88542012	88542154	+	4.7	0.688	Intergenic	Intergenic	-130098	130098	NM_018064	55122	Hs.485915	NM_018064	ENSG00000135334	AKIRIN2	AKIRIN2	C6orf166|FBI1|dJ486L4.2	akirin 2	protein-coding	4.7	0.688	10	10	2	4.94	5.11e-05	9.64	1.55e-07	0.97
chr1-407	chr1	46030154	46030294	+	4.8	0.9	intron (NM_153326, intron 2 of 8)	intron (NM_153326, intron 2 of 8)	13769	13769	NM_001202414	10327	Hs.721160	NM_001202414	ENSG00000117448	AKR1A1	AKR1A1	ALDR1|ALR|ARM|DD3	aldo-keto reductase family 1, member A1 (aldehyde reductase)	protein-coding	4.8	0.9	9	9	1.8	5.09	9.58e-05	10.18	3.74e-07	0.97
chr1-321	chr1	244006231	244006373	+	5.1	0.571	intron (NM_001206729, intron 2 of 13)	intron (NM_001206729, intron 2 of 13)	282	282	NM_181690	10000	Hs.498292	NM_001206729	ENSG00000117020	AKT3	AKT3	PKB-GAMMA|PKBG|PRKBG|RAC-PK-gamma|RAC-gamma|STK-2	v-akt murine thymoma viral oncogene homolog 3 (protein kinase B, gamma)	protein-coding	5.1	0.571	11	11	2.4	4.55	4.58e-05	5.45	8.97e-06	0.97
chr16-49	chr16	53583789	53583929	+	7.9	0.833	Intergenic	Intergenic	-46689	46689	NM_022476	64400	Hs.380897	NM_001012398	ENSG00000166971	AKTIP	AKTIP	FT1|FTS	AKT interacting protein	protein-coding	7.9	0.833	15	15	1.8	8.49	7.52e-10	12.73	2.98e-12	0.95
chr3-240	chr3	105087344	105087486	+	4.7	0.667	intron (NM_001627, intron 1 of 15)	intron (NM_001627, intron 1 of 15)	1858	1858	NM_001243280	214	Hs.740441	NM_001243280	ENSG00000170017	ALCAM	ALCAM	CD166|MEMD	activated leukocyte cell adhesion molecule	protein-coding	4.7	0.667	10	10	2	4.94	5.11e-05	4.99	4.69e-05	0.97
chr19-23	chr19	49956945	49957087	+	4.7	0.867	intron (NM_001145396, intron 1 of 15)	intron (NM_001145396, intron 1 of 15)	543	543	NM_001145396	126133	Hs.719998	NM_001145396	ENSG00000161618	ALDH16A1	ALDH16A1	-	aldehyde dehydrogenase 16 family, member A1	protein-coding	4.7	0.867	12	10	2	4.94	5.11e-05	7.89	9.38e-07	0.97
chr10-183	chr10	97397695	97397835	+	4.8	0.909	intron (NM_001017423, intron 3 of 17)	(CAA)n|Simple_repeat|Simple_repeat	18802	18802	NM_001017423	5832	Hs.500645	NM_001017423	ENSG00000059573	ALDH18A1	ALDH18A1	ARCL3A|GSAS|P5CS|PYCS	aldehyde dehydrogenase 18 family, member A1	protein-coding	4.8	0.909	9	9	1.8	5.09	9.58e-05	10.18	3.74e-07	0.97
chr17-36	chr17	19656726	19656868	+	5.6	0.682	Intergenic	Intergenic	-5051	5051	NM_000691	218	Hs.531682	NM_000691	ENSG00000108602	ALDH3A1	ALDH3A1	ALDH3|ALDHIII	aldehyde dehydrogenase 3 family, member A1	protein-coding	5.6	0.682	13	12	2	5.93	1.53e-06	4.34	3.33e-05	0.96
chr17-89	chr17	19533628	19533768	+	5.3	0.769	Intergenic	L2a|LINE|L2	-18366	18366	NM_000382	224	Hs.499886	NM_000382	ENSG00000072210	ALDH3A2	ALDH3A2	ALDH10|FALDH|SLS	aldehyde dehydrogenase 3 family, member A2	protein-coding	5.3	0.769	10	10	1.8	5.66	1.66e-05	8.92	3.15e-07	0.97
chr6-340	chr6	135269931	135270071	+	4.8	0.75	intron (NM_001193480, intron 1 of 5)	intron (NM_001193480, intron 1 of 5)	1259	1259	NM_170771	64577	Hs.486520	NM_001193480	ENSG00000118514	ALDH8A1	ALDH8A1	ALDH12|DJ352A20.2	aldehyde dehydrogenase 8 family, member A1	protein-coding	4.8	0.75	9	9	1.8	5.09	9.58e-05	8.93	1.2e-06	0.97
chrX-77	chrX	110986704	110986846	+	4.7	0.667	intron (NM_001257237, intron 23 of 25)	intron (NM_001257237, intron 23 of 25)	61890	61890	NM_001257239	79868	Hs.443061	NM_001039210	ENSG00000101901	ALG13	ALG13	CXorf45|GLT28D1|MDS031|YGL047W	asparagine-linked glycosylation 13 homolog (S. cerevisiae)	protein-coding	4.7	0.667	11	10	2	4.94	5.11e-05	7.89	9.38e-07	0.97
chr17-169	chr17	6758112	6758252	+	4.8	0.818	intron (NR_002710, intron 2 of 13)	intron (NR_002710, intron 2 of 13)	1287	1287	NR_002710	245	Hs.378695	NR_002710		ALOX12P2	ALOX12P2	ALOX12E	arachidonate 12-lipoxygenase pseudogene 2	pseudo	4.8	0.818	9	9	1.8	5.09	9.58e-05	8.34	2.08e-06	0.97
chr17-91	chr17	8023347	8023489	+	5.1	0.75	TTS (NM_001165967)	TTS (NM_001165967)	-1184	1184	NM_001165960	59344	Hs.232770	NM_001165960	ENSG00000179148	ALOXE3	ALOXE3	E-LOX|eLOX3	arachidonate lipoxygenase 3	protein-coding	5.1	0.75	11	11	2	5.44	9.23e-06	5.87	4.52e-06	0.97
chr12-84	chr12	47375211	47375353	+	4.7	0.769	Intergenic	L1MEc|LINE|L1	98452	98452	NM_181847	347902	Hs.121520	NM_001143668	ENSG00000139211	AMIGO2	AMIGO2	ALI1|AMIGO-2|DEGA	adhesion molecule with Ig-like domain 2	protein-coding	4.7	0.769	10	10	2	4.94	5.11e-05	7.01	2.64e-06	0.97
chrX-273	chrX	112148621	112148761	+	4.8	0.769	Intergenic	L1MCa|LINE|L1	-64648	64648	NM_133265	154796	Hs.528051	NM_001113490	ENSG00000126016	AMOT	AMOT	-	angiomotin	protein-coding	4.8	0.769	9	9	1.8	5.09	9.58e-05	8.45	1.87e-06	0.97
chr11-33	chr11	94483444	94483586	+	5.6	0.65	Intergenic	Intergenic	-17993	17993	NM_130847	154810	Hs.503594	NM_130847	ENSG00000166025	AMOTL1	AMOTL1	JEAP	angiomotin like 1	protein-coding	5.6	0.65	13	12	2	5.93	1.53e-06	6.04	1.28e-06	0.96
chr17-425	chr17	62971294	62971436	+	4.7	0.706	non-coding (NR_026903, exon 1 of 5)	non-coding (NR_026903, exon 1 of 5)	338	338	NR_026903	201283	Hs.396447	NM_153032		AMZ2P1	AMZ2P1	-	archaelysin family metallopeptidase 2 pseudogene 1	pseudo	4.7	0.706	10	10	2	4.94	5.11e-05	9.13	2.53e-07	0.97
chr2-166	chr2	112466716	112466856	+	5.3	0.733	Intergenic	L1ME4a|LINE|L1	174955	174955	NM_022662	64682	Hs.436527	NM_022662	ENSG00000153107	ANAPC1	ANAPC1	APC1|MCPR|TSG24	anaphase promoting complex subunit 1	protein-coding	5.3	0.733	10	10	2	5.03	4.45e-05	7.04	2.54e-06	0.97
chr4-70	chr4	146043227	146043367	+	5.3	0.733	intron (NM_001040876, intron 13 of 17)	L1M4|LINE|L1	-23604	23604	NM_001256708	10393	Hs.480876	NM_001256706	ENSG00000164162	ANAPC10	ANAPC10	APC10|DOC1	anaphase promoting complex subunit 10	protein-coding	5.3	0.733	11	10	1.8	5.66	1.66e-05	10.51	6.46e-08	0.97
chr10-157	chr10	73939542	73939682	+	4.8	0.692	intron (NR_045564, intron 5 of 9)	intron (NR_045564, intron 5 of 9)	-36146	36146	NR_038392	119504	Hs.426296	NM_001242546	ENSG00000166295	ANAPC16	ANAPC16	APC16|C10orf104|CENP-27|MSAG|bA570G20.3	anaphase promoting complex subunit 16	protein-coding	4.8	0.692	9	9	1.8	5.09	9.58e-05	6.28	1.96e-05	0.97
chr1-245	chr1	213187970	213188112	+	5.1	0.857	intron (NM_144567, intron 1 of 8)	L2b|LINE|L2	1127	1127	NM_144567	90806	Hs.157078	NM_144567	ENSG00000174606	ANGEL2	ANGEL2	KIAA0759L	angel homolog 2 (Drosophila)	protein-coding	5.1	0.857	11	11	2	5.44	9.23e-06	5.92	4.21e-06	0.97
chr8-21	chr8	108502993	108503135	+	6.6	0.56	intron (NM_001146, intron 1 of 8)	MER58A|DNA|hAT-Charlie	7190	7190	NM_001146	284	Hs.369675	NM_001146	ENSG00000154188	ANGPT1	ANGPT1	AGP1|AGPT|ANG1	angiopoietin 1	protein-coding	6.6	0.56	14	14	4	3.48	8.22e-05	4.36	7.29e-06	0.96
chr9-453	chr9	129929716	129929856	+	4.8	0.667	intron (NM_014636, intron 9 of 18)	MIRb|SINE|MIR	-44742	44742	NM_012098	23452	Hs.653262	NM_012098	ENSG00000136859	ANGPTL2	ANGPTL2	ARP2|HARP	angiopoietin-like 2	protein-coding	4.8	0.667	9	9	1.8	5.09	9.58e-05	5.37	6.43e-05	0.97
chr19-27	chr19	8422204	8422346	+	5.1	0.786	Intergenic	L1MC4|LINE|L1	-6736	6736	NM_139314	51129	Hs.9613	NM_001039667	ENSG00000167772	ANGPTL4	ANGPTL4	ANGPTL2|ARP4|FIAF|HFARP|NL2|PGAR|pp1158	angiopoietin-like 4	protein-coding	5.1	0.786	11	11	2	5.44	9.23e-06	10.87	1.13e-08	0.97
chr10-87	chr10	62477668	62477808	+	5.3	0.765	intron (NM_001204403, intron 1 of 43)	MER57C2|LTR|ERV1	15546	15546	NM_001204403	288	Hs.499725	NM_001149	ENSG00000151150	ANK3	ANK3	ANKYRIN-G	ankyrin 3, node of Ranvier (ankyrin G)	protein-coding	5.3	0.765	11	10	1.8	5.66	1.66e-05	6.34	6.28e-06	0.97
chr17-165	chr17	4152232	4152372	+	4.8	0.75	intron (NR_047571, intron 1 of 23)	intron (NR_047571, intron 1 of 23)	14840	14840	NM_001257999	51479	Hs.696087	NM_001257999	ENSG00000185722	ANKFY1	ANKFY1	ANKHZN|ZFYVE14	ankyrin repeat and FYVE domain containing 1	protein-coding	4.8	0.75	9	9	1.8	5.09	9.58e-05	7.46	5.08e-06	0.97
chr5-128	chr5	14936822	14936964	+	7	0.792	Intergenic	L1MB5|LINE|L1	-65006	65006	NM_054027	56172	Hs.156727	NM_054027	ENSG00000154122	ANKH	ANKH	ANK|CCAL2|CMDJ|CPPDD|HANK|MANK	ankylosis, progressive homolog (mouse)	protein-coding	7	0.792	15	15	3.2	4.65	1.6e-06	4.84	9.88e-07	0.95
chr16-71	chr16	89545503	89545645	+	5.6	0.737	intron (NM_001256182, intron 1 of 13)	intron (NM_001256182, intron 1 of 13)	11395	11395	NR_045839	29123	Hs.740440	NM_001256182	ENSG00000167522	ANKRD11	ANKRD11	ANCO-1|ANCO1|LZ16|T13	ankyrin repeat domain 11	protein-coding	5.6	0.737	13	12	2.4	4.96	9.07e-06	5.71	2.27e-06	0.96
chr18-26	chr18	9199781	9199921	+	5.8	0.857	intron (NM_001204056, intron 3 of 11)	HAL1b|LINE|L1	62290	62290	NM_001204056	23253	Hs.464585	NM_001083625	ENSG00000101745	ANKRD12	ANKRD12	ANCO-2|ANCO1|GAC-1|Nbla00144	ankyrin repeat domain 12	protein-coding	5.8	0.857	11	11	1.8	6.22	2.63e-06	9.11	6.59e-08	0.97
chr17-279	chr17	27919042	27919184	+	4.7	0.579	Intergenic	Intergenic	-1414	1414	NM_152345	124930	Hs.662164	NM_152345	ENSG00000198720	ANKRD13B	ANKRD13B	-	ankyrin repeat domain 13B	protein-coding	4.7	0.579	10	10	2	4.94	5.11e-05	5.03	4.42e-05	0.97
chr11-106	chr11	67055555	67055697	+	5.1	0.579	Intergenic	Intergenic	-1136	1136	NM_207354	338692	Hs.438673	NM_207354	ENSG00000172932	ANKRD13D	ANKRD13D	-	ankyrin repeat domain 13 family, member D	protein-coding	5.1	0.579	11	11	2.4	4.55	4.58e-05	6.42	1.97e-06	0.97
chr10-157	chr10	90612013	90612155	+	4.7	0.857	promoter-TSS (NM_144590)	promoter-TSS (NM_144590)	-352	352	NM_144590	118932	Hs.217484	NM_144590	ENSG00000152766	ANKRD22	ANKRD22	-	ankyrin repeat domain 22	protein-coding	4.7	0.857	10	10	2	4.94	5.11e-05	6.14	8.27e-06	0.97
chr16-267	chr16	46553929	46554069	+	4.8	0.643	intron (NR_026556, intron 8 of 16)	intron (NR_026556, intron 8 of 16)	49010	49010	NR_026556	124149	Hs.97414	NM_001004299		ANKRD26P1	ANKRD26P1	-	ankyrin repeat domain 26 pseudogene 1	pseudo	4.8	0.643	9	9	1.8	5.09	9.58e-05	6.82	1.03e-05	0.97
chr18-40	chr18	21206124	21206266	+	4.7	0.917	intron (NM_173505, intron 6 of 9)	intron (NM_173505, intron 6 of 9)	36654	36654	NM_173505	147463	Hs.374774	NM_173505	ENSG00000154065	ANKRD29	ANKRD29	-	ankyrin repeat domain 29	protein-coding	4.7	0.917	11	10	2	4.94	5.11e-05	6.14	8.27e-06	0.97
chr5-6921	chr5	93969113	93969253	+	4.8	0.818	intron (NM_032290, intron 4 of 20)	L1MD|LINE|L1	14792	14792	NM_032290	84250	Hs.657315	NM_032290	ENSG00000133302	ANKRD32	ANKRD32	BRCTD1|BRCTx	ankyrin repeat domain 32	protein-coding	4.8	0.818	9	9	1.8	5.09	9.58e-05	8.34	2.08e-06	0.97
chr5-497	chr5	10607667	10607809	+	6.1	0.625	intron (NM_001164440, intron 1 of 3)	intron (NM_001164440, intron 1 of 3)	43303	43303	NM_001164440	651746	Hs.26039	NM_001164440	ENSG00000164236	ANKRD33B	ANKRD33B	-	ankyrin repeat domain 33B	protein-coding	6.1	0.625	13	13	2.4	5.38	1.66e-06	3.92	4.41e-05	0.96
chr4-33	chr4	186316776	186316918	+	7	0.8	promoter-TSS (NM_181726)	promoter-TSS (NM_181726)	-993	993	NM_181726	353322	Hs.508154	NM_181726	ENSG00000186352	ANKRD37	ANKRD37	Lrp2bp	ankyrin repeat domain 37	protein-coding	7	0.8	15	15	3.2	4.65	1.6e-06	8.2	1.19e-09	0.95
chr17-403	chr17	48785362	48785504	+	4.7	0.647	promoter-TSS (NM_052855)	promoter-TSS (NM_052855)	-163	163	NM_052855	91369	Hs.463426	NM_052855	ENSG00000154945	ANKRD40	ANKRD40	-	ankyrin repeat domain 40	protein-coding	4.7	0.647	10	10	2	4.94	5.11e-05	5.3	2.88e-05	0.97
chr11-153	chr11	82906113	82906253	+	4.8	0.786	intron (NM_182603, intron 1 of 9)	intron (NM_182603, intron 1 of 9)	892	892	NM_182603	338699	Hs.657164	NM_182603	ENSG00000137494	ANKRD42	ANKRD42	SARP	ankyrin repeat domain 42	protein-coding	4.8	0.786	10	9	1.8	5.09	9.58e-05	7.29	6.11e-06	0.97
chr5-3359	chr5	55479685	55479825	+	4.8	0.833	intron (NM_024669, intron 2 of 11)	intron (NM_024669, intron 2 of 11)	49431	49431	NM_024669	79722	Hs.436214	NM_001039935	ENSG00000164512	ANKRD55	ANKRD55	-	ankyrin repeat domain 55	protein-coding	4.8	0.833	10	9	1.8	5.09	9.58e-05	8.8	1.35e-06	0.97
chr7-406	chr7	118479378	118479518	+	4.8	0.9	Intergenic	LTR43B|LTR|ERV1	614736	614736	NM_019644	56311	Hs.729340	NM_001077708	ENSG00000106013	ANKRD7	ANKRD7	TSA806	ankyrin repeat domain 7	protein-coding	4.8	0.9	9	9	1.8	5.09	9.58e-05	6.6	1.32e-05	0.97
chr11-300	chr11	69909366	69909506	+	4.8	0.909	Intergenic	Intergenic	-14972	14972	NM_018043	55107	Hs.503074	NM_018043	ENSG00000131620	ANO1	ANO1	DOG1|ORAOV2|TAOS2|TMEM16A	anoctamin 1, calcium activated chloride channel	protein-coding	4.8	0.909	9	9	1.8	5.09	9.58e-05	6.74	1.12e-05	0.97
chr12-96	chr12	45874004	45874144	+	4.8	0.833	Intergenic	Intergenic	187608	187608	NM_001142678	196527	Hs.505339	NM_001025356	ENSG00000177119	ANO6	ANO6	BDPLT7|SCTS|TMEM16F	anoctamin 6	protein-coding	4.8	0.833	9	9	1.8	5.09	9.58e-05	8.34	2.08e-06	0.97
chr15-73	chr15	35508380	35508522	+	4.7	0.909	Intergenic	Intergenic	-21076	21076	NR_003144	723972	Hs.631698	NR_003144		ANP32AP1	ANP32AP1	-	acidic (leucine-rich) nuclear phosphoprotein 32 family, member A pseudogene 1	pseudo	4.7	0.909	10	10	2	4.94	5.11e-05	9.64	1.55e-07	0.97
chr9-371	chr9	100744441	100744581	+	4.8	0.818	promoter-TSS (NM_006401)	promoter-TSS (NM_006401)	-978	978	NM_006401	10541	Hs.730654	NM_006401	ENSG00000136938	ANP32B	ANP32B	APRIL|PHAPI2|SSP29	acidic (leucine-rich) nuclear phosphoprotein 32 family, member B	protein-coding	4.8	0.818	9	9	1.8	5.09	9.58e-05	7.37	5.58e-06	0.97
chr4-135	chr4	165208748	165208888	+	5.3	0.846	intron (NM_001166373, intron 1 of 7)	intron (NM_001166373, intron 1 of 7)	-89955	89955	NM_012403	23520	Hs.661161	NM_012403		ANP32C	ANP32C	PP32R1	acidic (leucine-rich) nuclear phosphoprotein 32 family, member C	protein-coding	5.3	0.846	10	10	1.8	5.66	1.66e-05	8.19	6.73e-07	0.97
chr9-359	chr9	75753312	75753454	+	4.7	0.667	Intergenic	Intergenic	-13398	13398	NM_000700	301	Hs.494173	NM_000700	ENSG00000135046	ANXA1	ANXA1	ANX1|LPC1	annexin A1	protein-coding	4.7	0.667	10	10	2	4.94	5.11e-05	5.26	3.06e-05	0.97
chr4-298	chr4	169048756	169048898	+	4.7	0.909	intron (NM_007193, intron 1 of 11)	intron (NM_007193, intron 1 of 11)	35139	35139	NM_007193	11199	Hs.188401	NM_007193	ENSG00000109511	ANXA10	ANXA10	ANX14	annexin A10	protein-coding	4.7	0.909	10	10	2	4.94	5.11e-05	5.1	3.92e-05	0.97
chr15-15	chr15	60672270	60672410	+	6.3	0.765	intron (NM_001002857, intron 4 of 13)	(TG)n|Simple_repeat|Simple_repeat	17845	17845	NM_001002858	302	Hs.511605	NM_001002857	ENSG00000182718	ANXA2	ANXA2	ANX2|ANX2L4|CAL1H|LIP2|LPC2|LPC2D|P36|PAP-IV	annexin A2	protein-coding	6.3	0.765	12	12	1.8	6.79	3.83e-07	6.71	4.34e-07	0.96
chr4-62	chr4	79490161	79490301	+	5.3	0.75	intron (NM_005139, intron 2 of 12)	L2b|LINE|L2	17489	17489	NM_005139	306	Hs.480042	NM_005139	ENSG00000138772	ANXA3	ANXA3	ANX3	annexin A3	protein-coding	5.3	0.75	11	10	1.8	5.66	1.66e-05	5.55	1.97e-05	0.97
chr7-228	chr7	36707118	36707258	+	4.8	0.75	intron (NM_001637, intron 3 of 20)	MER44B|DNA|TcMar-Tigger	56966	56966	NM_001177507	313	Hs.488007	NM_001177506	ENSG00000136250	AOAH	AOAH	-	acyloxyacyl hydrolase (neutrophil)	protein-coding	4.8	0.75	9	9	1.8	5.09	9.58e-05	8.13	2.56e-06	0.97
chr2-408	chr2	201577311	201577453	+	4.7	0.786	non-coding (NR_037886, exon 3 of 3)	non-coding (NR_037886, exon 3 of 3)	16936	16936	NR_001557	344454	Hs.148269	NR_001557		AOX2P	AOX2P	AOH2|AOX2	aldehyde oxidase 2 pseudogene	pseudo	4.7	0.786	10	10	2	4.94	5.11e-05	6.43	5.61e-06	0.97
chr16-203	chr16	71818263	71818403	+	5.3	0.769	intron (NM_001030007, intron 2 of 23)	intron (NM_001030007, intron 2 of 23)	24643	24643	NM_001030007	164	Hs.461253	NM_001030007	ENSG00000166747	AP1G1	AP1G1	ADTG|CLAPG1	adaptor-related protein complex 1, gamma 1 subunit	protein-coding	5.3	0.769	10	10	1.8	5.66	1.66e-05	7.34	1.78e-06	0.97
chr19-19	chr19	47378693	47378835	+	6.1	0.812	Intergenic	Intergenic	-24561	24561	NM_004069	1175	Hs.119591	NM_004069	ENSG00000042753	AP2S1	AP2S1	AP17|AP17-DELTA|CLAPS2	adaptor-related protein complex 2, sigma 1 subunit	protein-coding	6.1	0.812	13	13	2.4	5.38	1.66e-06	11.28	3.49e-10	0.96
chr5-1573	chr5	77562929	77563069	+	5.3	0.857	intron (NM_003664, intron 2 of 26)	intron (NM_003664, intron 2 of 26)	27529	27529	NM_003664	8546	Hs.532091	NM_003664	ENSG00000132842	AP3B1	AP3B1	ADTB3|ADTB3A|HPS|HPS2|PE	adaptor-related protein complex 3, beta 1 subunit	protein-coding	5.3	0.857	11	10	1.8	5.66	1.66e-05	8	8.26e-07	0.97
chr15-50	chr15	51176697	51176837	+	5.3	0.857	Intergenic	MER47A|DNA|TcMar-Tigger	-24102	24102	NM_007347	23431	Hs.413366	NM_001252127	ENSG00000081014	AP4E1	AP4E1	CPSQ4|SPG51	adaptor-related protein complex 4, epsilon 1 subunit	protein-coding	5.3	0.857	10	10	2	5.03	4.45e-05	8	8.26e-07	0.97
chr14-294	chr14	31551453	31551593	+	4.8	0.706	intron (NM_007077, intron 5 of 5)	intron (NM_007077, intron 5 of 5)	55674	55674	NM_001254728	11154	Hs.293411	NM_001128126	ENSG00000100478	AP4S1	AP4S1	AP47B|CLA20|CLAPS4|CPSQ6|SPG52	adaptor-related protein complex 4, sigma 1 subunit	protein-coding	4.8	0.706	10	9	1.8	5.09	9.58e-05	8.45	1.87e-06	0.97
chr14-1211	chr14	57669206	57669348	+	4.7	0.857	TTS (NM_006544)	TTS (NM_006544)	-66329	66329	NM_018229	55745	Hs.597349	NM_018229	ENSG00000053770	AP5M1	AP5M1	C14orf108|MUDENG|Mu5|MuD	adaptor-related protein complex 5, mu 1 subunit	protein-coding	4.7	0.857	10	10	2	4.94	5.11e-05	4.79	6.63e-05	0.97
chr4-94	chr4	41188855	41188995	+	4.8	0.909	intron (NM_001166050, intron 1 of 17)	MIRb|SINE|MIR	27710	27710	NM_001166050	323	Hs.479602	NM_001166050	ENSG00000163697	APBB2	APBB2	FE65L|FE65L1	amyloid beta (A4) precursor protein-binding, family B, member 2	protein-coding	4.8	0.909	10	9	1.8	5.09	9.58e-05	6.09	2.46e-05	0.97
chr20-388	chr20	57038362	57038502	+	5.3	0.833	intron (NM_153360, intron 3 of 3)	intron (NM_153360, intron 3 of 3)	51517	51517	NM_153360	164284	Hs.119286	NM_153360	ENSG00000198768	APCDD1L	APCDD1L	-	adenomatosis polyposis coli down-regulated 1-like	protein-coding	5.3	0.833	10	10	2	5.03	4.45e-05	5.18	3.48e-05	0.97
chr1-147	chr1	10490902	10491044	+	4.7	0.824	non-coding (NR_037187, exon 1 of 3)	non-coding (NR_037187, exon 1 of 3)	169	169	NM_001243768	100526739	Hs.412311	NM_001243768	ENSG00000175279	APITD1-CORT	APITD1-CORT	-	APITD1-CORT readthrough	protein-coding	4.7	0.824	11	10	2	4.94	5.11e-05	6.68	4.05e-06	0.97
chr2-131	chr2	68715146	68715286	+	5.3	0.846	intron (NM_173545, intron 1 of 9)	intron (NM_173545, intron 1 of 9)	20525	20525	NM_173545	200558	Hs.720369	NM_173545	ENSG00000169621	APLF	APLF	APFL|C2orf13|PALF|Xip1	aprataxin and PNKP like factor	protein-coding	5.3	0.846	10	10	1.8	5.66	1.66e-05	8.49	4.9e-07	0.97
chr11-74	chr11	57041036	57041178	+	4.7	0.824	Intergenic	MLT1H1|LTR|ERVL-MaLR	-36180	36180	NM_005161	187	Hs.438311	NM_005161		APLNR	APLNR	AGTRL1|APJ|APJR|HG11	apelin receptor	protein-coding	4.7	0.824	11	10	2	4.94	5.11e-05	4.69	7.83e-05	0.97
chr1-221	chr1	183636928	183637068	+	4.8	0.786	intron (NM_015149, intron 1 of 18)	L1MCa|LINE|L1	-14550	14550	NM_203454	403314	Hs.97335	NM_203454	ENSG00000173627	APOBEC4	APOBEC4	C1orf169	apolipoprotein B mRNA editing enzyme, catalytic polypeptide-like 4 (putative)	protein-coding	4.8	0.786	10	9	1.8	5.09	9.58e-05	6.04	2.65e-05	0.97
chr16-122	chr16	88882354	88882494	+	5.3	0.786	intron (NM_000512, intron 13 of 13)	intron (NM_000512, intron 13 of 13)	-4082	4082	NM_001030018	353	Hs.28914	NM_000485	ENSG00000198931	APRT	APRT	AMP|APRTD	adenine phosphoribosyltransferase	protein-coding	5.3	0.786	11	10	1.8	5.66	1.66e-05	8.19	6.73e-07	0.97
chr11-145	chr11	77313323	77313463	+	4.8	0.688	intron (NM_173039, intron 1 of 2)	intron (NM_173039, intron 1 of 2)	12713	12713	NM_173039	282679	Hs.503345	NM_173039	ENSG00000178301	AQP11	AQP11	AQPX1	aquaporin 11	protein-coding	4.8	0.688	10	9	1.8	5.09	9.58e-05	5.42	6.03e-05	0.97
chr9-131	chr9	33445163	33445305	+	5.1	0.923	intron (NM_004925, intron 1 of 5)	MamRep38|DNA|hAT	2397	2397	NM_004925	360	Hs.234642	NM_004925	ENSG00000165272	AQP3	AQP3	AQP-3|GIL	aquaporin 3 (Gill blood group)	protein-coding	5.1	0.923	11	11	2	5.44	9.23e-06	8.3	1.65e-07	0.97
chr18-42	chr18	24373776	24373918	+	5.1	0.733	Intergenic	L1MA9|LINE|L1	68728	68728	NM_004028	361	Hs.315369	NM_001650	ENSG00000171885	AQP4	AQP4	HMIWC2|MIWC	aquaporin 4	protein-coding	5.1	0.733	11	11	2	5.44	9.23e-06	9.92	2.84e-08	0.97
chr15-106	chr15	58526664	58526804	+	4.8	0.75	Intergenic	Intergenic	96326	96326	NM_020980	366	Hs.104624	NM_020980	ENSG00000103569	AQP9	AQP9	AQP-9|HsT17287|SSC1	aquaporin 9	protein-coding	4.8	0.75	9	9	1.8	5.09	9.58e-05	6.21	2.12e-05	0.97
chr4-204	chr4	36259868	36260010	+	4.7	0.909	Intergenic	Intergenic	-13960	13960	NM_015230	116984	Hs.479451	NM_015230	ENSG00000047365	ARAP2	ARAP2	CENTD1|PARX	ArfGAP with RhoGAP domain, ankyrin repeat and PH domain 2	protein-coding	4.7	0.909	10	10	2	4.94	5.11e-05	8.79	3.58e-07	0.97
chr4-255	chr4	75350442	75350582	+	4.8	0.75	Intergenic	Intergenic	39659	39659	NM_001657	374	Hs.270833	NM_001657	ENSG00000109321	AREG	AREG	AR|CRDGF|SDGF	amphiregulin	protein-coding	4.8	0.75	9	9	1.8	5.09	9.58e-05	5.51	5.29e-05	0.97
chr14-99	chr14	50345486	50345628	+	6.1	0.824	Intergenic	L1MDa|LINE|L1	-14179	14179	NM_001663	382	Hs.719973	NM_001663	ENSG00000165527	ARF6	ARF6	-	ADP-ribosylation factor 6	protein-coding	6.1	0.824	13	13	3.2	4.03	3.35e-05	4.42	1.31e-05	0.96
chr8-621	chr8	68185829	68185969	+	4.8	0.75	intron (NM_006421, intron 9 of 38)	intron (NM_006421, intron 9 of 38)	70013	70013	NM_006421	10565	Hs.656902	NM_006421	ENSG00000066777	ARFGEF1	ARFGEF1	ARFGEP1|BIG1|P200	ADP-ribosylation factor guanine nucleotide-exchange factor 1 (brefeldin A-inhibited)	protein-coding	4.8	0.75	9	9	1.8	5.09	9.58e-05	8.23	2.31e-06	0.97
chr20-290	chr20	47562641	47562783	+	5.1	0.522	intron (NM_006420, intron 3 of 38)	intron (NM_006420, intron 3 of 38)	24437	24437	NM_006420	10564	Hs.62578	NM_006420	ENSG00000124198	ARFGEF2	ARFGEF2	BIG2|PVNH2|dJ1164I10.1	ADP-ribosylation factor guanine nucleotide-exchange factor 2 (brefeldin A-inhibited)	protein-coding	5.1	0.522	11	11	2.4	4.55	4.58e-05	4.34	6.96e-05	0.97
chr17-243	chr17	30530800	30530940	+	4.8	0.714	intron (NM_001033568, intron 15 of 20)	intron (NM_001033568, intron 15 of 20)	-52280	52280	NR_002222	503640	Hs.631752	NR_002222		ARGFXP2	ARGFXP2	-	arginine-fifty homeobox pseudogene 2	pseudo	4.8	0.714	9	9	1.8	5.09	9.58e-05	5.92	3.06e-05	0.97
chr4-269	chr4	86417942	86418082	+	4.8	0.75	intron (NM_001025616, intron 1 of 9)	intron (NM_001025616, intron 1 of 9)	21728	21728	NM_001025616	83478	Hs.444229	NM_001025616	ENSG00000138639	ARHGAP24	ARHGAP24	FILGAP|RC-GAP72|RCGAP72|p73|p73RhoGAP	Rho GTPase activating protein 24	protein-coding	4.8	0.75	9	9	1.8	5.09	9.58e-05	5.56	4.95e-05	0.97
chr5-6713	chr5	142413899	142414041	+	4.7	0.647	intron (NM_001135608, intron 12 of 22)	L1MB7|LINE|L1	-165495	165495	NR_046680	100874239	Hs.570896	NR_046680		ARHGAP26-AS1	ARHGAP26-AS1	-	ARHGAP26 antisense RNA 1	miscRNA	4.7	0.647	10	10	2	4.94	5.11e-05	5.74	1.48e-05	0.97
chr11-427	chr11	128883677	128883817	+	4.8	0.692	intron (NM_001142685, intron 10 of 21)	intron (NM_001142685, intron 10 of 21)	10341	10341	NM_014715	9743	Hs.440379	NM_001142685	ENSG00000134909	ARHGAP32	ARHGAP32	GC-GAP|GRIT|PX-RICS|RICS|p200RhoGAP|p250GAP	Rho GTPase activating protein 32	protein-coding	4.8	0.692	9	9	1.8	5.09	9.58e-05	7.29	6.11e-06	0.97
chr20-273	chr20	37227975	37228115	+	5.3	0.714	Intergenic	MIRb|SINE|MIR	-2532	2532	NM_001164431	343578	Hs.451997	NM_001164431	ENSG00000124143	ARHGAP40	ARHGAP40	C20orf95|dJ1100H13.4	Rho GTPase activating protein 40	protein-coding	5.3	0.714	10	10	1.8	5.66	1.66e-05	7.11	2.33e-06	0.97
chr11-141	chr11	100672490	100672632	+	5.1	0.857	intron (NM_152432, intron 3 of 23)	intron (NM_152432, intron 3 of 23)	114154	114154	NM_152432	143872	Hs.741465	NM_152432	ENSG00000165895	ARHGAP42	ARHGAP42	GRAF3	Rho GTPase activating protein 42	protein-coding	5.1	0.857	11	11	2.4	4.55	4.58e-05	9.67	3.67e-08	0.97
chr14-298	chr14	32529000	32529140	+	5.3	0.706	Intergenic	Intergenic	16835	16835	NR_027263	84837	Hs.496755	NM_032751		ARHGAP5-AS1	ARHGAP5-AS1	C14orf128	ARHGAP5 antisense RNA 1	miscRNA	5.3	0.706	10	10	2	5.03	4.45e-05	6.02	9.84e-06	0.97
chr12-24	chr12	15103962	15104104	+	5.1	0.857	intron (NM_001175, intron 1 of 5)	intron (NM_001175, intron 1 of 5)	10529	10529	NM_001175	397	Hs.504877	NM_001175	ENSG00000111348	ARHGDIB	ARHGDIB	D4|GDIA2|GDID4|LYGDI|Ly-GDI|RAP1GN1|RhoGDI2	Rho GDP dissociation inhibitor (GDI) beta	protein-coding	5.1	0.857	11	11	2	5.44	9.23e-06	5.45	8.97e-06	0.97
chr11-414	chr11	120242860	120243000	+	4.8	0.818	intron (NM_015313, intron 1 of 40)	intron (NM_015313, intron 1 of 40)	35312	35312	NM_001198665	23365	Hs.24598	NM_001198665	ENSG00000196914	ARHGEF12	ARHGEF12	LARG|PRO2792	Rho guanine nucleotide exchange factor (GEF) 12	protein-coding	4.8	0.818	9	9	1.8	5.09	9.58e-05	8.57	1.68e-06	0.97
chr3-352	chr3	153600909	153601049	+	4.8	0.769	Intergenic	Intergenic	-237813	237813	NM_001251962	26084	Hs.240845	NM_001251962	ENSG00000114790	ARHGEF26	ARHGEF26	CSGEF|HMFN1864|SGEF	Rho guanine nucleotide exchange factor (GEF) 26	protein-coding	4.8	0.769	9	9	1.8	5.09	9.58e-05	8.45	1.87e-06	0.97
chr5-3366	chr5	73233236	73233376	+	5.3	0.667	intron (NM_001080479, intron 36 of 36)	intron (NM_001080479, intron 36 of 36)	123963	123963	NM_001244364	64283	Hs.482521	NM_001080479	ENSG00000214944	ARHGEF28	ARHGEF28	RGNEF|RIP2|p190RHOGEF	Rho guanine nucleotide exchange factor (GEF) 28	protein-coding	5.3	0.667	10	10	2	5.03	4.45e-05	5.5	2.1e-05	0.97
chr3-193	chr3	57111484	57111624	+	4.8	0.818	intron (NM_001128615, intron 1 of 12)	intron (NM_001128615, intron 1 of 12)	1782	1782	NM_001128615	50650	Hs.476402	NM_001128615	ENSG00000163947	ARHGEF3	ARHGEF3	GEF3|STA3|XPLN	Rho guanine nucleotide exchange factor (GEF) 3	protein-coding	4.8	0.818	9	9	1.8	5.09	9.58e-05	9.6	6.02e-07	0.97
chr7-338	chr7	144079469	144079611	+	4.7	0.8	Intergenic	Intergenic	27051	27051	NM_005435	7984	Hs.534621	NM_005435	ENSG00000050327	ARHGEF5	ARHGEF5	GEF5|P60|TIM|TIM1	Rho guanine nucleotide exchange factor (GEF) 5	protein-coding	4.7	0.8	10	10	2	4.94	5.11e-05	7.55	1.39e-06	0.97
chr13-48	chr13	111809224	111809364	+	5.3	0.769	intron (NM_145735, intron 2 of 18)	intron (NM_145735, intron 2 of 18)	3233	3233	NM_003899	8874	Hs.508738	NM_001113511	ENSG00000102606	ARHGEF7	ARHGEF7	BETA-PIX|COOL-1|COOL1|Nbla10314|P50|P50BP|P85|P85COOL1|P85SPR|PAK3|PIXB	Rho guanine nucleotide exchange factor (GEF) 7	protein-coding	5.3	0.769	10	10	1.8	5.66	1.66e-05	8.29	6.06e-07	0.97
chr14-609	chr14	58797470	58797612	+	5.1	0.765	intron (NM_023000, intron 11 of 23)	intron (NM_023000, intron 11 of 23)	32319	32319	NM_023000	5926	Hs.161000	NM_002892	ENSG00000032219	ARID4A	ARID4A	RBBP-1|RBBP1|RBP-1|RBP1	AT rich interactive domain 4A (RBP1-like)	protein-coding	5.1	0.765	11	11	2.4	4.55	4.58e-05	4.31	7.32e-05	0.97
chr10-98	chr10	63579557	63579699	+	5.1	0.8	Intergenic	Intergenic	-81385	81385	NM_032199	84159	Hs.535297	NM_001244638	ENSG00000150347	ARID5B	ARID5B	DESRT|MRF-2|MRF2	AT rich interactive domain 5B (MRF1-like)	protein-coding	5.1	0.8	11	11	2	5.44	9.23e-06	8.04	2.26e-07	0.97
chr5-6862	chr5	53605303	53605443	+	4.8	0.818	intron (NM_019087, intron 1 of 4)	intron (NM_019087, intron 1 of 4)	1030	1030	NM_019087	54622	Hs.659125	NM_019087	ENSG00000185305	ARL15	ARL15	ARFRP2	ADP-ribosylation factor-like 15	protein-coding	4.8	0.818	9	9	1.8	5.09	9.58e-05	7.73	3.82e-06	0.97
chr7-44	chr7	13071129	13071271	+	5.6	0.882	Intergenic	Intergenic	344289	344289	NM_005738	10124	Hs.741524	NM_001037164	ENSG00000122644	ARL4A	ARL4A	ARL4	ADP-ribosylation factor-like 4A	protein-coding	5.6	0.882	12	12	2	5.93	1.53e-06	9.58	9.89e-09	0.96
chr2-440	chr2	235331777	235331919	+	4.7	0.769	Intergenic	MLT1D|LTR|ERVL-MaLR	73845	73845	NM_005737	10123	Hs.730678	NM_005737	ENSG00000188042	ARL4C	ARL4C	ARL7|LAK	ADP-ribosylation factor-like 4C	protein-coding	4.7	0.769	10	10	2	4.94	5.11e-05	7.63	1.26e-06	0.97
chr17-133	chr17	41475766	41475906	+	4.8	0.769	promoter-TSS (NM_001661)	promoter-TSS (NM_001661)	-517	517	NM_001661	379	Hs.709866	NM_001661	ENSG00000175906	ARL4D	ARL4D	ARF4L|ARL6	ADP-ribosylation factor-like 4D	protein-coding	4.8	0.769	10	9	1.8	5.09	9.58e-05	5.2	8.25e-05	0.97
chr3-244	chr3	97328661	97328801	+	4.8	0.9	intron (NM_001080448, intron 12 of 17)	intron (NM_001080448, intron 12 of 17)	-154864	154864	NM_177976	84100	Hs.373801	NM_032146	ENSG00000113966	ARL6	ARL6	BBS3|RP55	ADP-ribosylation factor-like 6	protein-coding	4.8	0.9	9	9	1.8	5.09	9.58e-05	6.89	9.49e-06	0.97
chr12-74	chr12	27528834	27528976	+	4.7	0.8	intron (NM_001248002, intron 3 of 15)	intron (NM_001248002, intron 3 of 15)	43118	43118	NM_001248002	56938	Hs.445447	NM_001248002	ENSG00000029153	ARNTL2	ARNTL2	BMAL2|CLIF|MOP9|PASD9|bHLHe6	aryl hydrocarbon receptor nuclear translocator-like 2	protein-coding	4.7	0.8	10	10	2	4.94	5.11e-05	8.47	5e-07	0.97
chr5-6914	chr5	90677274	90677414	+	4.8	0.818	intron (NR_027435, intron 1 of 2)	intron (NR_027435, intron 1 of 2)	1180	1180	NR_027435	100129716	Hs.116364	NR_027435		ARRDC3-AS1	ARRDC3-AS1	-	ARRDC3 antisense RNA 1	miscRNA	4.8	0.818	9	9	1.8	5.09	9.58e-05	5.42	6.03e-05	0.97
chr4-115	chr4	115150617	115150759	+	5.1	0.786	Intergenic	MLT1I|LTR|ERVL-MaLR	-249810	249810	NM_024590	79642	Hs.712042	NM_024590	ENSG00000180801	ARSJ	ARSJ	-	arylsulfatase family, member J	protein-coding	5.1	0.786	11	11	2	5.44	9.23e-06	9.2	6e-08	0.97
chr1-148	chr1	44350740	44350880	+	5.3	0.833	intron (NR_073018, intron 6 of 10)	intron (NR_073018, intron 6 of 10)	-48182	48182	NM_001136215	9048	Hs.632404	NM_001136215	ENSG00000117407	ARTN	ARTN	ENOVIN|EVN|NBN	artemin	protein-coding	5.3	0.833	10	10	1.8	5.66	1.66e-05	5.68	1.61e-05	0.97
chr10-103	chr10	52077136	52077276	+	4.8	0.588	intron (NM_147156, intron 8 of 10)	MIRc|SINE|MIR	-68836	68836	NM_019893	56624	Hs.512645	NM_001143974	ENSG00000188611	ASAH2	ASAH2	BCDase|HNAC1|LCDase|N-CDase|NCDase	N-acylsphingosine amidohydrolase (non-lysosomal ceramidase) 2	protein-coding	4.8	0.588	10	9	1.8	5.09	9.58e-05	6.82	1.03e-05	0.97
chr10-140	chr10	73986686	73986828	+	4.7	0.786	intron (NM_001242548, intron 2 of 2)	intron (NM_001242548, intron 2 of 2)	-9865	9865	NR_045564	51008	Hs.500007	NM_001198798	ENSG00000138303	ASCC1	ASCC1	ASC1p50|p50	activating signal cointegrator 1 complex subunit 1	protein-coding	4.7	0.786	10	10	2	4.94	5.11e-05	7.63	1.26e-06	0.97
chr6-128	chr6	101232314	101232456	+	4.7	0.722	intron (NM_006828, intron 8 of 41)	L1M5|LINE|L1	96839	96839	NM_006828	10973	Hs.486031	NM_006828	ENSG00000112249	ASCC3	ASCC3	ASC1p200|DJ467N11.1|HELIC1|RNAH|dJ121G13.4|p200	activating signal cointegrator 1 complex subunit 3	protein-coding	4.7	0.722	11	10	2	4.94	5.11e-05	6.43	5.61e-06	0.97
chr8-615	chr8	62574097	62574237	+	4.8	0.833	intron (NM_032468, intron 4 of 14)	intron (NM_032468, intron 4 of 14)	28241	28241	NM_001164752	444	Hs.332422	NM_001164750	ENSG00000198363	ASPH	ASPH	AAH|BAH|CASQ2BP1|HAAH|JCTN|junctin	aspartate beta-hydroxylase	protein-coding	4.8	0.833	9	9	1.8	5.09	9.58e-05	6.15	2.28e-05	0.97
chr9-397	chr9	119449284	119449424	+	4.8	0.9	promoter-TSS (NM_001099679)	promoter-TSS (NM_001099679)	140	140	NM_198186	23245	Hs.601562	NM_001184734	ENSG00000148219	ASTN2	ASTN2	bA67K19.1	astrotactin 2	protein-coding	4.8	0.9	9	9	1.8	5.09	9.58e-05	9.6	6.02e-07	0.97
chr20-34	chr20	30945076	30945218	+	6.6	0.708	Intergenic	Intergenic	-1000	1000	NM_001164603	171023	Hs.374043	NM_001164603	ENSG00000171456	ASXL1	ASXL1	BOPS|MDS	additional sex combs like 1 (Drosophila)	protein-coding	6.6	0.708	14	14	3.2	4.34	7.56e-06	4.32	8.04e-06	0.96
chr10-102	chr10	89521908	89522050	+	5.1	0.737	intron (NM_032810, intron 8 of 9)	intron (NM_032810, intron 8 of 9)	55938	55938	NM_032810	84896	Hs.435948	NM_032810	ENSG00000138138	ATAD1	ATAD1	AFDC1|THORASE	ATPase family, AAA domain containing 1	protein-coding	5.1	0.737	11	11	2.4	4.55	4.58e-05	7.64	3.73e-07	0.97
chr8-205	chr8	124387622	124387764	+	5.1	0.6	intron (NM_014109, intron 2 of 27)	L1MB8|LINE|L1	21012	21012	NM_014109	29028	Hs.370834	NM_014109	ENSG00000156802	ATAD2	ATAD2	ANCCA|PRO2000	ATPase family, AAA domain containing 2	protein-coding	5.1	0.6	12	11	2.4	4.55	4.58e-05	4.99	2.01e-05	0.97
chr17-233	chr17	29160381	29160521	+	4.8	0.643	intron (NM_024857, intron 1 of 22)	intron (NM_024857, intron 1 of 22)	1428	1428	NM_024857	79915	Hs.528902	NM_024857	ENSG00000176208	ATAD5	ATAD5	C17orf41|ELG1|FRAG1	ATPase family, AAA domain containing 5	protein-coding	4.8	0.643	9	9	1.8	5.09	9.58e-05	5.61	4.63e-05	0.97
chr1-103	chr1	212769099	212769239	+	5.3	0.846	intron (NM_001030287, intron 1 of 3)	MER45A|DNA|hAT-Tip100	-12801	12801	NM_001674	467	Hs.460	NM_001030287	ENSG00000162772	ATF3	ATF3	-	activating transcription factor 3	protein-coding	5.3	0.846	11	10	1.8	5.66	1.66e-05	7.26	1.95e-06	0.97
chr12-117	chr12	53999438	53999578	+	4.8	0.75	intron (NR_073163, intron 1 of 12)	intron (NR_073163, intron 1 of 12)	-4703	4703	NM_001130059	11016	Hs.633602	NM_001130059	ENSG00000170653	ATF7	ATF7	ATFA	activating transcription factor 7	protein-coding	4.8	0.75	9	9	1.8	5.09	9.58e-05	7.83	3.47e-06	0.97
chr5-3373	chr5	81360045	81360185	+	4.8	0.833	intron (NM_031482, intron 3 of 7)	intron (NM_031482, intron 3 of 7)	92271	92271	NM_001131028	83734	Hs.713698	NM_001131028	ENSG00000152348	ATG10	ATG10	APG10|APG10L|pp12616	autophagy related 10	protein-coding	4.8	0.833	10	9	1.8	5.09	9.58e-05	8.68	1.5e-06	0.97
chr14-247	chr14	55879209	55879349	+	5.8	0.812	promoter-TSS (NM_014924)	promoter-TSS (NM_014924)	-703	703	NM_014924	22863	Hs.414809	NM_014924	ENSG00000126775	ATG14	ATG14	ATG14L|BARKOR|KIAA0831	autophagy related 14	protein-coding	5.8	0.812	11	11	2	5.53	7.92e-06	4.67	3.67e-05	0.97
chr11-55	chr11	72683445	72683585	+	5.3	0.812	intron (NM_014824, intron 8 of 19)	intron (NM_014824, intron 8 of 19)	158064	158064	NM_033388	89849	Hs.653186	NM_033388	ENSG00000168010	ATG16L2	ATG16L2	ATG16B|WDR80	autophagy related 16-like 2 (S. cerevisiae)	protein-coding	5.3	0.812	11	10	1.8	5.66	1.66e-05	5.82	1.31e-05	0.97
chr11-18	chr11	64683889	64684031	+	5.6	0.625	intron (NM_015104, intron 1 of 40)	intron (NM_015104, intron 1 of 40)	762	762	NM_015104	23130	Hs.370671	NM_015104	ENSG00000110046	ATG2A	ATG2A	-	autophagy related 2A	protein-coding	5.6	0.625	14	12	2.4	4.96	9.07e-06	8.41	3.98e-08	0.96
chrX-16	chrX	107463503	107463643	+	5.8	0.812	intron (NM_001847, intron 4 of 44)	LTR53|LTR|ERVL	128674	128674	NM_178270	115201	Hs.8763	NM_052936	ENSG00000101844	ATG4A	ATG4A	APG4A|AUTL2	autophagy related 4A, cysteine peptidase	protein-coding	5.8	0.812	12	11	1.8	6.22	2.63e-06	6.57	1.59e-06	0.97
chr6-303	chr6	106705388	106705528	+	4.8	0.75	intron (NM_004849, intron 5 of 7)	MIRb|SINE|MIR	68237	68237	NM_004849	9474	Hs.486063	NM_004849	ENSG00000057663	ATG5	ATG5	APG5|APG5-LIKE|APG5L|ASP|hAPG5	autophagy related 5	protein-coding	4.8	0.75	9	9	1.8	5.09	9.58e-05	5.76	3.78e-05	0.97
chr3-15	chr3	11330653	11330793	+	4.8	0.846	intron (NM_001144912, intron 1 of 16)	intron (NM_001144912, intron 1 of 16)	16713	16713	NM_001144912	10533	Hs.38032	NM_001136031	ENSG00000197548	ATG7	ATG7	APG7-LIKE|APG7L|GSA7	autophagy related 7	protein-coding	4.8	0.846	11	9	1.8	5.09	9.58e-05	7.64	4.21e-06	0.97
chr14-57	chr14	51028388	51028530	+	6.6	0.593	intron (NM_181598, intron 1 of 12)	intron (NM_181598, intron 1 of 12)	1716	1716	NM_015915	51062	Hs.584905	NM_001127713	ENSG00000198513	ATL1	ATL1	AD-FSP|FSP1|GBP3|HSN1D|SPG3|SPG3A|atlastin1	atlastin GTPase 1	protein-coding	6.6	0.593	14	14	2	6.92	3.37e-08	4.34	7.66e-06	0.96
chr2-123	chr2	38593630	38593772	+	4.7	0.812	intron (NM_001135673, intron 1 of 12)	intron (NM_001135673, intron 1 of 12)	10731	10731	NM_022374	64225	Hs.727652	NM_001135673	ENSG00000119787	ATL2	ATL2	ARL3IP2|ARL6IP2|atlastin2	atlastin GTPase 2	protein-coding	4.7	0.812	11	10	2	4.94	5.11e-05	9.26	2.24e-07	0.97
chr11-94	chr11	63435693	63435835	+	5.1	0.7	intron (NM_015459, intron 1 of 12)	intron (NM_015459, intron 1 of 12)	3319	3319	NM_015459	25923	Hs.356719	NM_015459	ENSG00000184743	ATL3	ATL3	-	atlastin GTPase 3	protein-coding	5.1	0.7	11	11	2.4	4.55	4.58e-05	4.9	2.39e-05	0.97
chr4-283	chr4	94686078	94686218	+	4.8	0.643	intron (NM_001510, intron 14 of 15)	intron (NM_001510, intron 14 of 15)	-63930	63930	NM_005172	474	Hs.532680	NM_005172	ENSG00000172238	ATOH1	ATOH1	ATH1|HATH1|MATH-1|bHLHa14	atonal homolog 1 (Drosophila)	protein-coding	4.8	0.643	9	9	1.8	5.09	9.58e-05	9.19	8.6e-07	0.97
chr10-152	chr10	69945303	69945443	+	4.8	0.833	intron (NR_045662, intron 12 of 19)	intron (NR_045662, intron 12 of 19)	46497	46497	NM_145178	220202	Hs.737072	NM_145178	ENSG00000179774	ATOH7	ATOH7	Math5|bHLHa13	atonal homolog 7 (Drosophila)	protein-coding	4.8	0.833	9	9	1.8	5.09	9.58e-05	10.18	3.74e-07	0.97
chr2-300	chr2	85969361	85969501	+	4.8	0.818	Intergenic	Intergenic	-11478	11478	NM_032827	84913	Hs.135569	NM_032827	ENSG00000168874	ATOH8	ATOH8	HATH6|bHLHa21	atonal homolog 8 (Drosophila)	protein-coding	4.8	0.818	9	9	1.8	5.09	9.58e-05	9.32	7.65e-07	0.97
chr5-7093	chr5	160164896	160165036	+	4.8	0.667	intron (NM_025153, intron 2 of 25)	L1MEf|LINE|L1	114253	114253	NM_025153	23120	Hs.109358	NM_025153	ENSG00000118322	ATP10B	ATP10B	ATPVB	ATPase, class V, type 10B	protein-coding	4.8	0.667	9	9	1.8	5.09	9.58e-05	8.68	1.5e-06	0.97
chr1-27	chr1	203595154	203595296	+	5.6	0.619	promoter-TSS (NM_001684)	promoter-TSS (NM_001684)	-690	690	NM_001001396	493	Hs.733333	NM_001001396	ENSG00000058668	ATP2B4	ATP2B4	ATP2B2|MXRA1|PMCA4|PMCA4b|PMCA4x	ATPase, Ca++ transporting, plasma membrane 4	protein-coding	5.6	0.619	14	12	2.4	4.96	9.07e-06	5.59	2.79e-06	0.96
chr18-51	chr18	43684045	43684187	+	4.7	0.846	promoter-TSS (NR_026978)	promoter-TSS (NR_026978)	83	83	NM_001001937	498	Hs.298280	NM_001001935	ENSG00000152234	ATP5A1	ATP5A1	ATP5A|ATP5AL2|ATPM|MOM2|OMR|ORM|hATP1	ATP synthase, H+ transporting, mitochondrial F1 complex, alpha subunit 1, cardiac muscle	protein-coding	4.7	0.846	11	10	2	4.94	5.11e-05	9.64	1.55e-07	0.97
chr21-10	chr21	27253816	27253958	+	8.4	0.76	3' UTR (NM_201414, exon 16 of 16)	3' UTR (NM_201414, exon 16 of 16)	-145922	145922	NM_001685	522	Hs.246310	NM_001003696	ENSG00000154723	ATP5J	ATP5J	ATP5|ATP5A|ATPM|CF6|F6	ATP synthase, H+ transporting, mitochondrial Fo complex, subunit F6	protein-coding	8.4	0.76	18	18	2	8.9	7.45e-12	13.73	5.9e-15	0.94
chr17-300	chr17	40622323	40622463	+	4.8	0.688	intron (NM_001130021, intron 5 of 21)	intron (NM_001130021, intron 5 of 21)	11531	11531	NM_001130020	535	Hs.463074	NM_001130020	ENSG00000033627	ATP6V0A1	ATP6V0A1	ATP6N1|ATP6N1A|Stv1|VPP1|Vph1|a1	ATPase, H+ transporting, lysosomal V0 subunit a1	protein-coding	4.8	0.688	9	9	1.8	5.09	9.58e-05	5.24	7.76e-05	0.97
chr16-394	chr16	67512020	67512160	+	4.8	0.9	intron (NM_004691, intron 1 of 7)	MIRb|SINE|MIR	2999	2999	NM_004691	9114	Hs.106876	NM_004691	ENSG00000159720	ATP6V0D1	ATP6V0D1	ATP6D|ATP6DV|P39|VATX|VMA6|VPATPD	ATPase, H+ transporting, lysosomal 38kDa, V0 subunit d1	protein-coding	4.8	0.9	9	9	1.8	5.09	9.58e-05	6.53	1.43e-05	0.97
chr22-13	chr22	18111738	18111880	+	4.7	0.667	promoter-TSS (NM_001696)	promoter-TSS (NM_001696)	-221	221	NM_001039367	529	Hs.517338	NM_001039366	ENSG00000131100	ATP6V1E1	ATP6V1E1	ATP6E|ATP6E2|ATP6V1E|P31|Vma4	ATPase, H+ transporting, lysosomal 31kDa, V1 subunit E1	protein-coding	4.7	0.667	10	10	2	4.94	5.11e-05	7.16	2.21e-06	0.97
chr9-152	chr9	117351747	117351889	+	4.7	0.846	intron (NM_004888, intron 1 of 2)	intron (NM_004888, intron 1 of 2)	1824	1824	NM_004888	9550	Hs.388654	NM_004888	ENSG00000136888	ATP6V1G1	ATP6V1G1	ATP6G|ATP6G1|ATP6GL|ATP6J|Vma10	ATPase, H+ transporting, lysosomal 13kDa, V1 subunit G1	protein-coding	4.7	0.846	11	10	2	4.94	5.11e-05	7.46	1.53e-06	0.97
chr8-605	chr8	54489403	54489543	+	4.8	0.818	Intergenic	L1MD2|LINE|L1	266129	266129	NM_213620	51606	Hs.491737	NM_015941	ENSG00000047249	ATP6V1H	ATP6V1H	MSTP042|NBP1|SFD|SFDalpha|SFDbeta|VMA13	ATPase, H+ transporting, lysosomal 50/57kDa, V1 subunit H	protein-coding	4.8	0.818	9	9	1.8	5.09	9.58e-05	9.9	4.69e-07	0.97
chr13-56	chr13	26179400	26179540	+	4.8	0.917	intron (NM_016529, intron 24 of 36)	intron (NM_016529, intron 24 of 36)	233261	233261	NM_016529	51761	Hs.444957	NM_016529	ENSG00000132932	ATP8A2	ATP8A2	ATP|ATPIB|IB|ML-1	ATPase, aminophospholipid transporter, class I, type 8A, member 2	protein-coding	4.8	0.917	9	9	1.8	5.09	9.58e-05	9.75	5.32e-07	0.97
chr20-351	chr20	50368008	50368148	+	5.3	0.786	intron (NM_006045, intron 1 of 27)	AluJo|SINE|Alu	16830	16830	NM_006045	10079	Hs.649234	NM_006045	ENSG00000054793	ATP9A	ATP9A	ATPIIA	ATPase, class II, type 9A	protein-coding	5.3	0.786	10	10	1.8	5.66	1.66e-05	5.18	3.48e-05	0.97
chr15-23	chr15	36023024	36023166	+	5.1	0.857	intron (NR_038251, intron 2 of 2)	L1MB7|LINE|L1	-184691	184691	NM_001141972	89978	Hs.107196	NM_001141972	ENSG00000134146	ATPBD4	ATPBD4	-	ATP binding domain 4	protein-coding	5.1	0.857	12	11	2	5.44	9.23e-06	8.78	9.56e-08	0.97
chr6-106	chr6	16766382	16766524	+	5.1	0.786	Intergenic	Intergenic	-4732	4732	NM_000332	6310	Hs.434961	NM_000332	ENSG00000124788	ATXN1	ATXN1	ATX1|D6S504E|SCA1	ataxin 1	protein-coding	5.1	0.786	11	11	2.4	4.55	4.58e-05	5.7	5.99e-06	0.97
chr17-42	chr17	42278100	42278242	+	5.6	0.609	Intergenic	Intergenic	-2642	2642	NM_001098833	56970	Hs.512651	NM_001098833	ENSG00000087152	ATXN7L3	ATXN7L3	-	ataxin 7-like 3	protein-coding	5.6	0.609	13	12	2.4	4.96	9.07e-06	6.26	8.79e-07	0.96
chr8-259	chr8	103881786	103881926	+	5.3	0.917	Intergenic	Intergenic	-5459	5459	NM_015878	51582	Hs.459106	NM_015878	ENSG00000155096	AZIN1	AZIN1	OAZI|OAZIN|ODC1L	antizyme inhibitor 1	protein-coding	5.3	0.917	10	10	1.8	5.66	1.66e-05	9.03	2.81e-07	0.97
chr1-822	chr1	235611630	235611770	+	4.8	0.688	exon (NM_003193, exon 16 of 17)	exon (NM_003193, exon 16 of 17)	56081	56081	NM_152490	148789	Hs.498143	NM_152490	ENSG00000162885	B3GALNT2	B3GALNT2	B3GalNAc-T2	beta-1,3-N-acetylgalactosaminyltransferase 2	protein-coding	4.8	0.688	9	9	1.8	5.09	9.58e-05	6.89	9.49e-06	0.97
chr1-223	chr1	194111417	194111557	+	5.3	0.833	Intergenic	Intergenic	-955744	955744	NM_003783	8707	Hs.518834	NM_003783	ENSG00000162630	B3GALT2	B3GALT2	BETA3GALT2|GLCT2|beta3Gal-T2	UDP-Gal:betaGlcNAc beta 1,3-galactosyltransferase, polypeptide 2	protein-coding	5.3	0.833	10	10	1.8	5.66	1.66e-05	8.92	3.15e-07	0.97
chr3-383	chr3	182974003	182974143	+	4.8	0.9	intron (NM_032047, intron 1 of 1)	intron (NM_032047, intron 1 of 1)	3041	3041	NM_032047	84002	Hs.718506	NM_032047	ENSG00000176597	B3GNT5	B3GNT5	B3GN-T5|beta3Gn-T5	UDP-GlcNAc:betaGal beta-1,3-N-acetylglucosaminyltransferase 5	protein-coding	4.8	0.9	9	9	1.8	5.09	9.58e-05	6.47	1.55e-05	0.97
chr16-393	chr16	67182010	67182150	+	4.8	0.643	TTS (NM_033309)	TTS (NM_033309)	2822	2822	NM_033309	84752	Hs.732160	NM_033309	ENSG00000237172	B3GNT9	B3GNT9	-	UDP-GlcNAc:betaGal beta-1,3-N-acetylglucosaminyltransferase 9	protein-coding	4.8	0.643	9	9	1.8	5.09	9.58e-05	7.64	4.21e-06	0.97
chr9-55	chr9	33182384	33182524	+	5.3	0.846	Intergenic	Intergenic	-15098	15098	NM_001497	2683	Hs.272011	NM_001497	ENSG00000086062	B4GALT1	B4GALT1	B4GAL-T1|CDG2D|GGTB2|GT1|GTB|beta4Gal-T1	UDP-Gal:betaGlcNAc beta 1,4- galactosyltransferase, polypeptide 1	protein-coding	5.3	0.846	11	10	1.8	5.66	1.66e-05	8.69	3.94e-07	0.97
chr20-139	chr20	48331270	48331410	+	5.8	0.765	promoter-TSS (NM_004776)	promoter-TSS (NM_004776)	-919	919	NM_004776	9334	Hs.370487	NM_004776	ENSG00000158470	B4GALT5	B4GALT5	B4Gal-T5|BETA4-GALT-IV|beta4Gal-T5|beta4GalT-V|gt-V	UDP-Gal:betaGlcNAc beta 1,4- galactosyltransferase, polypeptide 5	protein-coding	5.8	0.765	11	11	2	5.53	7.92e-06	4.97	2.1e-05	0.97
chr5-3465	chr5	177027895	177028035	+	5.3	0.667	intron (NM_007255, intron 1 of 5)	intron (NM_007255, intron 1 of 5)	846	846	NM_007255	11285	Hs.455109	NM_007255	ENSG00000027847	B4GALT7	B4GALT7	XGALT1|XGPT1	xylosylprotein beta 1,4-galactosyltransferase, polypeptide 7	protein-coding	5.3	0.667	10	10	2	5.03	4.45e-05	8.1	7.46e-07	0.97
chr21-92	chr21	30634980	30635120	+	4.8	0.6	intron (NR_027072, intron 1 of 1)	Tigger1|DNA|TcMar-Tigger	-36170	36170	NM_001186	571	Hs.154276	NM_001186	ENSG00000156273	BACH1	BACH1	BACH-1	BTB and CNC homology 1, basic leucine zipper transcription factor 1	protein-coding	4.8	0.6	9	9	1.8	5.09	9.58e-05	6.04	2.65e-05	0.97
chr6-249	chr6	90928535	90928677	+	4.7	0.909	intron (NM_001170794, intron 1 of 6)	intron (NM_001170794, intron 1 of 6)	77956	77956	NM_021813	60468	Hs.269764	NM_001170794	ENSG00000112182	BACH2	BACH2	-	BTB and CNC homology 1, basic leucine zipper transcription factor 2	protein-coding	4.7	0.909	10	10	2	4.94	5.11e-05	5.64	1.7e-05	0.97
chr10-189	chr10	121439868	121440010	+	4.7	0.688	Intergenic	Intergenic	29057	29057	NM_004281	9531	Hs.523309	NM_004281	ENSG00000151929	BAG3	BAG3	BAG-3|BIS|CAIR-1	BCL2-associated athanogene 3	protein-coding	4.7	0.688	10	10	2	4.94	5.11e-05	6.55	4.78e-06	0.97
chr6-269	chr6	68794428	68794568	+	4.8	0.75	Intergenic	Intergenic	-551134	551134	NM_001704	577	Hs.13261	NM_001704	ENSG00000135298	BAI3	BAI3	-	brain-specific angiogenesis inhibitor 3	protein-coding	4.8	0.75	9	9	1.8	5.09	9.58e-05	6.89	9.49e-06	0.97
chr11-161	chr11	129328525	129328665	+	4.8	0.625	Intergenic	Intergenic	82714	82714	NM_003658	8538	Hs.591944	NM_003658	ENSG00000043039	BARX2	BARX2	-	BARX homeobox 2	protein-coding	4.8	0.625	10	9	1.8	5.09	9.58e-05	7.73	3.82e-06	0.97
chr5-63	chr5	17228672	17228814	+	7	0.759	intron (NM_006317, intron 1 of 1)	intron (NM_006317, intron 1 of 1)	10993	10993	NM_006317	10409	Hs.201641	NM_006317	ENSG00000176788	BASP1	BASP1	CAP-23|CAP23|NAP-22|NAP22	brain abundant, membrane attached signal protein 1	protein-coding	7	0.759	16	15	4	3.72	2.16e-05	3.3	8.34e-05	0.95
chr1-110	chr1	212894769	212894911	+	5.6	0.812	Intergenic	L3b|LINE|CR1	-21513	21513	NM_018664	55509	Hs.62919	NM_018664	ENSG00000123685	BATF3	BATF3	JDP1|JUNDM1|SNFT	basic leucine zipper transcription factor, ATF-like 3	protein-coding	5.6	0.812	12	12	2.4	4.96	9.07e-06	9.47	1.12e-08	0.96
chr2-184	chr2	160471573	160471715	+	4.7	0.667	intron (NM_013450, intron 1 of 36)	intron (NM_013450, intron 1 of 36)	1415	1415	NM_013450	29994	Hs.470369	NM_013450	ENSG00000123636	BAZ2B	BAZ2B	WALp4	bromodomain adjacent to zinc finger domain, 2B	protein-coding	4.7	0.667	11	10	2	4.94	5.11e-05	5.42	2.37e-05	0.97
chr11-159	chr11	27189311	27189453	+	4.7	0.786	Intergenic	LTR16B1|LTR|ERVL	126873	126873	NM_003986	8424	Hs.591996	NM_003986	ENSG00000129151	BBOX1	BBOX1	BBH|BBOX|G-BBH|gamma-BBH	butyrobetaine (gamma), 2-oxoglutarate dioxygenase (gamma-butyrobetaine hydroxylase) 1	protein-coding	4.7	0.786	10	10	2	4.94	5.11e-05	9.89	1.24e-07	0.97
chr3-245	chr3	107255294	107255436	+	4.7	0.733	intron (NM_001142568, intron 2 of 17)	intron (NM_001142568, intron 2 of 17)	13582	13582	NM_001142568	56987	Hs.124366	NM_001142568	ENSG00000114439	BBX	BBX	HBP2|HSPC339|MDS001	bobby sox homolog (Drosophila)	protein-coding	4.7	0.733	10	10	2	4.94	5.11e-05	7.31	1.84e-06	0.97
chr16-460	chr16	75356448	75356588	+	4.8	0.643	intron (NM_006324, intron 5 of 6)	Tigger4a|DNA|TcMar-Tigger	-54567	54567	NM_001170715	9564	Hs.479747	NM_001170714	ENSG00000050820	BCAR1	BCAR1	CAS|CAS1|CASS1|CRKAS|P130Cas	breast cancer anti-estrogen resistance 1	protein-coding	4.8	0.643	9	9	1.8	5.09	9.58e-05	7.37	5.58e-06	0.97
chr20-185	chr20	52726117	52726259	+	5.6	0.737	Intergenic	Intergenic	-38884	38884	NM_003657	8537	Hs.731932	NM_003657	ENSG00000064787	BCAS1	BCAS1	AIBC1|NABC1	breast carcinoma amplified sequence 1	protein-coding	5.6	0.737	12	12	2	5.93	1.53e-06	4.17	4.89e-05	0.96
chr1-474	chr1	115124039	115124179	+	4.8	0.692	intron (NM_005872, intron 1 of 6)	intron (NM_005872, intron 1 of 6)	156	156	NM_005872	10286	Hs.22960	NM_005872	ENSG00000116752	BCAS2	BCAS2	DAM1|SPF27|Snt309	breast carcinoma amplified sequence 2	protein-coding	4.8	0.692	9	9	1.8	5.09	9.58e-05	8.34	2.08e-06	0.97
chr3-110	chr3	165573611	165573753	+	5.1	0.647	Intergenic	Intergenic	-18429	18429	NM_000055	590	Hs.420483	NM_000055	ENSG00000114200	BCHE	BCHE	CHE1|E1	butyrylcholinesterase	protein-coding	5.1	0.647	11	11	2	5.44	9.23e-06	6.11	3.13e-06	0.97
chr6-125	chr6	80793858	80794000	+	5.1	0.917	Intergenic	L1MC4|LINE|L1	-22415	22415	NM_000056	594	Hs.654441	NM_000056	ENSG00000083123	BCKDHB	BCKDHB	E1B|dJ279A18.1	branched chain keto acid dehydrogenase E1, beta polypeptide	protein-coding	5.1	0.917	11	11	2	5.44	9.23e-06	9.43	4.71e-08	0.97
chr2-274	chr2	60790109	60790249	+	4.8	0.909	Intergenic	L2c|LINE|L2	-9546	9546	NM_138559	53335	Hs.370549	NM_018014	ENSG00000119866	BCL11A	BCL11A	BCL11A-L|BCL11A-S|BCL11A-XL|BCL11a-M|CTIP1|EVI9|HBFQTL5|ZNF856	B-cell CLL/lymphoma 11A (zinc finger protein)	protein-coding	4.8	0.909	9	9	1.8	5.09	9.58e-05	10.18	3.74e-07	0.97
chr20-6	chr20	30298966	30299108	+	8.9	0.75	intron (NM_001191, intron 2 of 2)	intron (NM_001191, intron 2 of 2)	11619	11619	NM_138578	598	Hs.516966	NM_001191	ENSG00000171552	BCL2L1	BCL2L1	BCL-XL/S|BCL2L|BCLX|BCLXL|BCLXS|Bcl-X|PPP1R52|bcl-xL|bcl-xS	BCL2-like 1	protein-coding	8.9	0.75	19	19	3.2	5.9	1.77e-09	5.66	3.37e-09	0.94
chr11-145	chr11	112067046	112067188	+	5.1	0.75	intron (NM_001256397, intron 5 of 11)	intron (NM_001256397, intron 5 of 11)	20028	20028	NM_001256397	83875	Hs.728325	NM_001037290	ENSG00000197580	BCO2	BCO2	B-DIOX-II|BCDO2	beta-carotene oxygenase 2	protein-coding	5.1	0.75	11	11	2	5.44	9.23e-06	7.87	2.77e-07	0.97
chr3-310	chr3	197221008	197221150	+	4.7	0.917	Intergenic	L2c|LINE|L2	61779	61779	NM_203314	622	Hs.274539	NM_004051	ENSG00000161267	BDH1	BDH1	BDH|SDR9C1	3-hydroxybutyrate dehydrogenase, type 1	protein-coding	4.7	0.917	10	10	2	4.94	5.11e-05	6.74	3.73e-06	0.97
chr5-3364	chr5	70778920	70779060	+	4.8	0.714	intron (NM_018429, intron 7 of 38)	intron (NM_018429, intron 7 of 38)	27548	27548	NM_018429	55814	Hs.258272	NM_018429	ENSG00000145734	BDP1	BDP1	HSA238520|TAF3B1|TFC5|TFIIIB''|TFIIIB150|TFIIIB90|TFNR	B double prime 1, subunit of RNA polymerase III transcription initiation factor IIIB	protein-coding	4.8	0.714	10	9	1.8	5.09	9.58e-05	7.46	5.08e-06	0.97
chr6-255	chr6	56824107	56824247	+	4.8	0.769	intron (NM_152731, intron 1 of 6)	intron (NM_152731, intron 1 of 6)	4404	4404	NM_152731	221336	Hs.582993	NM_152731	ENSG00000151917	BEND6	BEND6	C6orf65|bA203B9.1	BEN domain containing 6	protein-coding	4.8	0.769	9	9	1.8	5.09	9.58e-05	6.4	1.68e-05	0.97
chr12-30	chr12	26306676	26306816	+	5.3	0.667	Intergenic	Intergenic	-28743	28743	NM_030762	79365	Hs.177841	NM_030762	ENSG00000123095	BHLHE41	BHLHE41	BHLHB3|DEC2|SHARP1|hDEC2	basic helix-loop-helix family, member e41	protein-coding	5.3	0.667	10	10	1.8	5.66	1.66e-05	6.52	4.96e-06	0.97
chr12-33	chr12	32329619	32329759	+	5.3	0.769	intron (NM_001003398, intron 1 of 8)	L1ME2|LINE|L1	69504	69504	NM_001714	636	Hs.505202	NM_001003398	ENSG00000151746	BICD1	BICD1	BICD	bicaudal D homolog 1 (Drosophila)	protein-coding	5.3	0.769	10	10	1.8	5.66	1.66e-05	9.39	1.97e-07	0.97
chr20-125	chr20	36154444	36154586	+	5.6	0.722	intron (NM_001167820, intron 1 of 2)	intron (NM_001167820, intron 1 of 2)	-1562	1562	NM_001167823	10904	Hs.472651	NM_001167820	ENSG00000166619	BLCAP	BLCAP	BC10	bladder cancer associated protein	protein-coding	5.6	0.722	12	12	2.4	4.96	9.07e-06	4.38	3.01e-05	0.96
chr4-89	chr4	6732988	6733130	+	5.1	0.632	Intergenic	Intergenic	15217	15217	NM_018366	55330	Hs.7570	NM_018366	ENSG00000186222	BLOC1S4	BLOC1S4	BCAS4L|CNO	biogenesis of lysosomal organelles complex-1, subunit 4, cappuccino	protein-coding	5.1	0.632	11	11	2	5.44	9.23e-06	9.79	3.23e-08	0.97
chr7-229	chr7	43804454	43804594	+	4.8	0.857	intron (NM_001253823, intron 2 of 8)	MIR3|SINE|MIR	6252	6252	NM_001253823	644	Hs.488143	NM_000712	ENSG00000106605	BLVRA	BLVRA	BLVR|BVR|BVRA	biliverdin reductase A	protein-coding	4.8	0.857	9	9	1.8	5.09	9.58e-05	6.89	9.49e-06	0.97
chr20-418	chr20	6707056	6707196	+	4.8	0.818	Intergenic	Intergenic	-41619	41619	NM_001200	650	Hs.73853	NM_001200	ENSG00000125845	BMP2	BMP2	BDA2|BMP2A	bone morphogenetic protein 2	protein-coding	4.8	0.818	9	9	1.8	5.09	9.58e-05	9.32	7.65e-07	0.97
chr4-106	chr4	81943383	81943523	+	5.3	0.714	Intergenic	Intergenic	-8666	8666	NM_001201	651	Hs.387411	NM_001201	ENSG00000152785	BMP3	BMP3	BMP-3A	bone morphogenetic protein 3	protein-coding	5.3	0.714	10	10	1.8	5.66	1.66e-05	9.27	2.22e-07	0.97
chr14-554	chr14	54433626	54433768	+	5.1	0.611	Intergenic	Intergenic	-10143	10143	NM_001202	652	Hs.68879	NM_001202	ENSG00000125378	BMP4	BMP4	BMP2B|BMP2B1|MCOPS6|OFC11|ZYME	bone morphogenetic protein 4	protein-coding	5.1	0.611	11	11	2	5.44	9.23e-06	4.74	3.17e-05	0.97
chr6-253	chr6	55813293	55813433	+	4.8	0.833	Intergenic	L1M5|LINE|L1	-72988	72988	NM_021073	653	Hs.296648	NM_021073	ENSG00000112175	BMP5	BMP5	-	bone morphogenetic protein 5	protein-coding	4.8	0.833	9	9	1.8	5.09	9.58e-05	9.6	6.02e-07	0.97
chr20-762	chr20	55583431	55583573	+	4.7	0.667	Intergenic	Intergenic	258205	258205	NM_001719	655	Hs.473163	NM_001719	ENSG00000101144	BMP7	BMP7	OP-1	bone morphogenetic protein 7	protein-coding	4.7	0.667	10	10	2	4.94	5.11e-05	5.47	2.22e-05	0.97
chr7-91	chr7	33804723	33804865	+	4.7	0.857	Intergenic	MIRb|SINE|MIR	-139729	139729	NM_133468	168667	Hs.735847	NM_133468	ENSG00000164619	BMPER	BMPER	CRIM3|CV-2|CV2	BMP binding endothelial regulator	protein-coding	4.7	0.857	11	10	2	4.94	5.11e-05	9.89	1.24e-07	0.97
chr4-285	chr4	95897689	95897829	+	4.8	0.692	intron (NM_001203, intron 2 of 12)	MLT1G-int|LTR|ERVL-MaLR	-19624	19624	NM_001256792	658	Hs.598475	NM_001203	ENSG00000138696	BMPR1B	BMPR1B	ALK-6|ALK6|CDw293	bone morphogenetic protein receptor, type IB	protein-coding	4.8	0.692	9	9	1.8	5.09	9.58e-05	9.06	9.65e-07	0.97
chr9-263	chr9	16790410	16790550	+	4.8	0.692	intron (NM_017637, intron 1 of 6)	Tigger6a|DNA|TcMar-Tigger	80306	80306	NM_017637	54796	Hs.740070	NM_017637	ENSG00000173068	BNC2	BNC2	BSN2	basonuclin 2	protein-coding	4.8	0.692	9	9	1.8	5.09	9.58e-05	7.37	5.58e-06	0.97
chr5-210	chr5	172570951	172571093	+	6.6	0.833	promoter-TSS (NM_013978)	promoter-TSS (NM_013978)	-423	423	NM_001205	662	Hs.145726	NM_001205	ENSG00000113734	BNIP1	BNIP1	NIP1|SEC20|TRG-8	BCL2/adenovirus E1B 19kDa interacting protein 1	protein-coding	6.6	0.833	15	14	4	3.48	8.22e-05	8.1	4.89e-09	0.96
chr5-3571	chr5	173155269	173155411	+	4.7	0.786	Intergenic	MIRb|SINE|MIR	-111674	111674	NM_138369	91272	Hs.425091	NM_001159651	ENSG00000145919	BOD1	BOD1	FAM44B	biorientation of chromosomes in cell division 1	protein-coding	4.7	0.786	11	10	2	4.94	5.11e-05	7.71	1.14e-06	0.97
chr20-103	chr20	31879574	31879716	+	5.6	0.778	intron (NM_033197, intron 5 of 15)	MIR3|SINE|MIR	8704	8704	NM_033197	92747	Hs.65551	NM_033197	ENSG00000125999	BPIFB1	BPIFB1	C20orf114|LPLUNC1	BPI fold containing family B, member 1	protein-coding	5.6	0.778	12	12	2	5.93	1.53e-06	6.94	3.04e-07	0.96
chr7-427	chr7	140623540	140623680	+	4.8	0.909	intron (NM_004333, intron 1 of 17)	intron (NM_004333, intron 1 of 17)	954	954	NM_004333	673	Hs.550061	NM_004333	ENSG00000157764	BRAF	BRAF	B-RAF1|BRAF1|NS7|RAFB1	v-raf murine sarcoma viral oncogene homolog B1	protein-coding	4.8	0.909	9	9	1.8	5.09	9.58e-05	6.97	8.71e-06	0.97
chr13-57	chr13	32912516	32912658	+	4.7	0.769	exon (NM_000059, exon 11 of 27)	exon (NM_000059, exon 11 of 27)	22970	22970	NM_000059	675	Hs.34012	NM_000059	ENSG00000139618	BRCA2	BRCA2	BRCC2|BROVCA2|FACD|FAD|FAD1|FANCB|FANCD|FANCD1|GLM3|PNCA2	breast cancer 2, early onset	protein-coding	4.7	0.769	10	10	2	4.94	5.11e-05	8.17	6.89e-07	0.97
chr6-327	chr6	118597373	118597513	+	4.8	0.818	intron (NM_001029858, intron 5 of 7)	intron (NM_001029858, intron 5 of 7)	-225093	225093	NR_002730	23629	Hs.648050	NR_002730		BRD7P3	BRD7P3	BP75	bromodomain containing 7 pseudogene 3	pseudo	4.8	0.818	9	9	1.8	5.09	9.58e-05	9.46	6.79e-07	0.97
chr14-751	chr14	36295030	36295172	+	4.7	0.722	promoter-TSS (NM_032352)	promoter-TSS (NM_032352)	-496	496	NM_032352	84312	Hs.525299	NM_032352	ENSG00000100916	BRMS1L	BRMS1L	BRMS1	breast cancer metastasis-suppressor 1-like	protein-coding	4.7	0.722	10	10	2	4.94	5.11e-05	4.82	6.27e-05	0.97
chr3-190	chr3	49561513	49561653	+	4.8	0.75	intron (NM_001177643, intron 2 of 2)	intron (NM_001177643, intron 2 of 2)	30216	30216	NR_038866	100132677	Hs.435651	NR_038866		BSN-AS2	BSN-AS2	-	BSN antisense RNA 2	miscRNA	4.8	0.75	9	9	1.8	5.09	9.58e-05	9.75	5.32e-07	0.97
chr12-176	chr12	107690147	107690287	+	4.8	0.786	Intergenic	MIRb|SINE|MIR	-21980	21980	NM_001018072	121551	Hs.271272	NM_152322	ENSG00000151136	BTBD11	BTBD11	-	BTB (POZ) domain containing 11	protein-coding	4.8	0.786	9	9	1.8	5.09	9.58e-05	7.2	6.69e-06	0.97
chr21-78	chr21	19068237	19068377	+	4.8	0.692	Intergenic	Intergenic	-83039	83039	NM_001130914	10950	Hs.473420	NM_001130914	ENSG00000154640	BTG3	BTG3	ANA|TOB5|TOB55|TOFA	BTG family, member 3	protein-coding	4.8	0.692	9	9	1.8	5.09	9.58e-05	10.18	3.74e-07	0.97
chr3-36	chr3	112200799	112200941	+	5.1	0.765	intron (NM_181780, intron 1 of 4)	MSTD-int|LTR|ERVL-MaLR	17538	17538	NM_001085357	151888	Hs.445162	NM_001085357	ENSG00000186265	BTLA	BTLA	BTLA1|CD272	B and T lymphocyte associated	protein-coding	5.1	0.765	12	11	2.4	4.55	4.58e-05	9.79	3.23e-08	0.97
chr10-114	chr10	103206160	103206300	+	4.8	0.769	intron (NM_001256856, intron 2 of 13)	intron (NM_001256856, intron 2 of 13)	92440	92440	NM_001256856	8945	Hs.713753	NM_001256856	ENSG00000166167	BTRC	BTRC	BETA-TRCP|FBW1A|FBXW1|FBXW1A|FWD1|bTrCP|bTrCP1|betaTrCP	beta-transducin repeat containing E3 ubiquitin protein ligase	protein-coding	4.8	0.769	10	9	1.8	5.09	9.58e-05	6.09	2.46e-05	0.97
chr15-86	chr15	40453311	40453451	+	4.8	0.9	5' UTR (NM_001211, exon 1 of 23)	5' UTR (NM_001211, exon 1 of 23)	171	171	NM_001211	701	Hs.513645	NM_001211	ENSG00000156970	BUB1B	BUB1B	BUB1beta|BUBR1|Bub1A|MAD3L|SSK1|hBUBR1	budding uninhibited by benzimidazoles 1 homolog beta (yeast)	protein-coding	4.8	0.9	9	9	1.8	5.09	9.58e-05	5.76	3.78e-05	0.97
chr10-117	chr10	124914497	124914637	+	5.3	0.846	exon (NM_004725, exon 2 of 8)	exon (NM_004725, exon 2 of 8)	807	807	NM_004725	9184	Hs.418533	NM_001007793	ENSG00000154473	BUB3	BUB3	BUB3L|hBUB3	budding uninhibited by benzimidazoles 3 homolog (yeast)	protein-coding	5.3	0.846	10	10	2	5.03	4.45e-05	7.49	1.48e-06	0.97
chr10-168	chr10	96950245	96950387	+	4.7	0.786	Intergenic	L1ME1|LINE|L1	-3641	3641	NM_207321	142827	Hs.134229	NM_207321	ENSG00000173124	C10orf129	C10orf129	ACSM6|bA310E22.3	chromosome 10 open reading frame 129	protein-coding	4.7	0.786	10	10	2	4.94	5.11e-05	5.74	1.48e-05	0.97
chr10-88	chr10	73532293	73532433	+	5.3	0.636	intron (NM_022153, intron 1 of 6)	intron (NM_022153, intron 1 of 6)	974	974	NM_022153	64115	Hs.47382	NM_022153	ENSG00000107738	C10orf54	C10orf54	B7-H5|B7H5|GI24|PP2135|SISP1	chromosome 10 open reading frame 54	protein-coding	5.3	0.636	11	10	1.8	5.66	1.66e-05	6.84	3.29e-06	0.97
chr11-98	chr11	64068357	64068499	+	4.7	0.8	TTS (NM_033310)	TTS (NM_033310)	565	565	NM_001039496	25858	Hs.97174	NM_001039496	ENSG00000219435	C11orf20	C11orf20	-	chromosome 11 open reading frame 20	protein-coding	4.7	0.8	11	10	2	4.94	5.11e-05	7.8	1.04e-06	0.97
chr11-286	chr11	76198428	76198570	+	4.7	0.846	intron (NM_020193, intron 8 of 20)	Tigger4|DNA|TcMar-Tigger	42430	42430	NM_020193	56946	Hs.352588	NM_020193	ENSG00000158636	C11orf30	C11orf30	EMSY	chromosome 11 open reading frame 30	protein-coding	4.7	0.846	10	10	2	4.94	5.11e-05	9.51	1.76e-07	0.97
chr11-408	chr11	112191183	112191323	+	4.8	0.769	Intergenic	Intergenic	-59670	59670	NM_001145024	349633	Hs.632097	NM_001145024	ENSG00000188771	C11orf34	C11orf34	PLET1	chromosome 11 open reading frame 34	protein-coding	4.8	0.769	9	9	1.8	5.09	9.58e-05	5.24	7.76e-05	0.97
chr11-280	chr11	66536135	66536275	+	4.8	0.625	intron (NR_048553, intron 2 of 14)	intron (NR_048553, intron 2 of 14)	23998	23998	NM_024650	79703	Hs.292088	NM_024650	ENSG00000173715	C11orf80	C11orf80	-	chromosome 11 open reading frame 80	protein-coding	4.8	0.625	9	9	1.8	5.09	9.58e-05	5.46	5.65e-05	0.97
chr11-49	chr11	66738169	66738309	+	5.3	0.722	Intergenic	MSTD|LTR|ERVL-MaLR	-4515	4515	NM_001136485	254439	Hs.232604	NM_001136485	ENSG00000173237	C11orf86	C11orf86	-	chromosome 11 open reading frame 86	protein-coding	5.3	0.722	11	10	1.8	5.66	1.66e-05	6.29	6.78e-06	0.97
chr11-144	chr11	108969210	108969352	+	4.7	0.688	Intergenic	L1ME3D|LINE|L1	-323565	323565	NM_207645	399947	Hs.172982	NM_207645	ENSG00000185742	C11orf87	C11orf87	LOH11CR1A	chromosome 11 open reading frame 87	protein-coding	4.7	0.688	11	10	2	4.94	5.11e-05	6.55	4.78e-06	0.97
chr11-43	chr11	61491379	61491521	+	5.6	0.8	intron (NM_006133, intron 5 of 19)	MIR|SINE|MIR	-28671	28671	NM_001127392	745	Hs.473109	NM_001127392	ENSG00000124920	C11orf9	C11orf9	MRF|Ndt80	chromosome 11 open reading frame 9	protein-coding	5.6	0.8	12	12	2	5.93	1.53e-06	9.06	1.81e-08	0.96
chr12-69	chr12	13818871	13819011	+	4.8	0.818	intron (NM_000834, intron 4 of 12)	intron (NM_000834, intron 4 of 12)	-289262	289262	NR_036555	283422	Hs.448717	NM_182558		C12orf36	C12orf36	-	chromosome 12 open reading frame 36	miscRNA	4.8	0.818	9	9	1.8	5.09	9.58e-05	8.93	1.2e-06	0.97
chr12-138	chr12	64486048	64486188	+	4.8	0.818	intron (NM_020762, intron 12 of 21)	intron (NM_020762, intron 12 of 21)	129958	129958	NM_152440	144577	Hs.505871	NM_152440	ENSG00000174206	C12orf66	C12orf66	-	chromosome 12 open reading frame 66	protein-coding	4.8	0.818	9	9	1.8	5.09	9.58e-05	7.12	7.31e-06	0.97
chr12-73	chr12	27218703	27218845	+	4.7	0.769	Intergenic	Intergenic	16681	16681	NM_001080406	728858	Hs.334003	NM_001080406	ENSG00000214700	C12orf71	C12orf71	-	chromosome 12 open reading frame 71	protein-coding	4.7	0.769	10	10	2	4.94	5.11e-05	9.89	1.24e-07	0.97
chr13-116	chr13	76888026	76888168	+	4.7	0.769	Intergenic	Intergenic	442923	442923	NM_001257995	729420	Hs.586820	NM_001257995	ENSG00000178734	C13orf45	C13orf45	-	chromosome 13 open reading frame 45	protein-coding	4.7	0.769	10	10	2	4.94	5.11e-05	9.89	1.24e-07	0.97
chr14-1208	chr14	57012469	57012611	+	4.7	0.765	Intergenic	Intergenic	-33971	33971	NM_017799	54916	Hs.497253	NM_017799	ENSG00000070269	C14orf101	C14orf101	-	chromosome 14 open reading frame 101	protein-coding	4.7	0.765	10	10	2	4.94	5.11e-05	5.83	1.28e-05	0.97
chr14-475	chr14	52450883	52451023	+	5.3	0.769	Intergenic	Intergenic	-5275	5275	NM_016039	51637	Hs.534457	NM_016039	ENSG00000087302	C14orf166	C14orf166	CGI99|CLE|CLE7|LCRP369|RLLM1	chromosome 14 open reading frame 166	protein-coding	5.3	0.769	10	10	1.8	5.66	1.66e-05	4.66	8.2e-05	0.97
chr14-13	chr14	50469839	50469981	+	7	0.625	intron (NM_001012706, intron 1 of 3)	intron (NM_001012706, intron 1 of 3)	4328	4328	NM_001012706	283551	Hs.660867	NM_001012706	ENSG00000214900	C14orf182	C14orf182	-	chromosome 14 open reading frame 182	protein-coding	7	0.625	16	15	4	3.72	2.16e-05	3.36	6.77e-05	0.95
chr14-386	chr14	50537978	50538118	+	5.3	0.846	Intergenic	MIRc|SINE|MIR	21313	21313	NM_001014830	196913	Hs.406934	NM_001014830	ENSG00000168260	C14orf183	C14orf183	-	chromosome 14 open reading frame 183	protein-coding	5.3	0.846	10	10	2	5.03	4.45e-05	5.55	1.97e-05	0.97
chr14-656	chr14	29362284	29362424	+	4.8	0.833	Intergenic	MIR|SINE|MIR	120444	120444	NR_026731	387978	Hs.633254	NR_026731		C14orf23	C14orf23	c14_5148	chromosome 14 open reading frame 23	miscRNA	4.8	0.833	9	9	1.8	5.09	9.58e-05	7.29	6.11e-06	0.97
chr14-374	chr14	45256316	45256458	+	5.1	0.786	Intergenic	Intergenic	-110120	110120	NM_001017923	122525	Hs.82098	NM_001017923	ENSG00000179476	C14orf28	C14orf28	DRIP-1|DRIP1|c14_5270	chromosome 14 open reading frame 28	protein-coding	5.1	0.786	11	11	2	5.44	9.23e-06	5.06	1.79e-05	0.97
chr14-294	chr14	58605448	58605590	+	5.1	0.875	exon (NM_001001872, exon 2 of 8)	exon (NM_001001872, exon 2 of 8)	13328	13328	NM_001001872	145407	Hs.535420	NM_001001872	ENSG00000139971	C14orf37	C14orf37	c14_5376	chromosome 14 open reading frame 37	protein-coding	5.1	0.875	12	11	2	5.44	9.23e-06	6.31	2.31e-06	0.97
chr14-1290	chr14	60936532	60936672	+	4.8	0.75	intron (NM_174978, intron 7 of 17)	intron (NM_174978, intron 7 of 17)	16162	16162	NM_174978	317761	Hs.335754	NM_174978	ENSG00000179008	C14orf39	C14orf39	Six6os1	chromosome 14 open reading frame 39	protein-coding	4.8	0.75	9	9	1.8	5.09	9.58e-05	5.56	4.95e-05	0.97
chr15-46	chr15	39578251	39578391	+	5.3	0.833	Intergenic	Intergenic	35436	35436	NM_207445	400360	Hs.376109	NM_207445	ENSG00000175746	C15orf54	C15orf54	-	chromosome 15 open reading frame 54	protein-coding	5.3	0.833	10	10	1.8	5.66	1.66e-05	9.15	2.5e-07	0.97
chr16-239	chr16	4577509	4577649	+	4.8	0.714	intron (NM_001199055, intron 1 of 5)	intron (NM_001199055, intron 1 of 5)	10892	10892	NM_001199054	29965	Hs.654653	NM_001199054	ENSG00000089486	C16orf5	C16orf5	CDIP|I1	chromosome 16 open reading frame 5	protein-coding	4.8	0.714	9	9	1.8	5.09	9.58e-05	10.18	3.74e-07	0.97
chr16-165	chr16	58176625	58176765	+	4.8	0.667	Intergenic	L1MB8|LINE|L1	-13399	13399	NM_013242	29105	Hs.532755	NM_013242	ENSG00000070761	C16orf80	C16orf80	EVORF|GTL3|fSAP23	chromosome 16 open reading frame 80	protein-coding	4.8	0.667	10	9	1.8	5.09	9.58e-05	10.18	3.74e-07	0.97
chr16-134	chr16	46888326	46888466	+	5.3	0.8	Intergenic	Intergenic	-23322	23322	NM_001001436	388272	Hs.406551	NM_001001436	ENSG00000155330	C16orf87	C16orf87	-	chromosome 16 open reading frame 87	protein-coding	5.3	0.8	10	10	1.8	5.66	1.66e-05	5.97	1.06e-05	0.97
chr16-171	chr16	87350358	87350500	+	5.1	0.812	intron (NM_001195124, intron 1 of 6)	MLT1K|LTR|ERVL-MaLR	597	597	NM_001256917	100506581	Hs.729380	NM_001195124	ENSG00000131152	C16orf95	C16orf95	-	chromosome 16 open reading frame 95	protein-coding	5.1	0.812	11	11	2	5.44	9.23e-06	6.82	1.11e-06	0.97
chr17-52	chr17	32862034	32862174	+	5.3	0.714	Intergenic	Intergenic	44284	44284	NM_207454	400591	Hs.514090	NM_207454	ENSG00000197322	C17orf102	C17orf102	-	chromosome 17 open reading frame 102	protein-coding	5.3	0.714	11	10	2	5.03	4.45e-05	11.32	3.31e-08	0.97
chr17-115	chr17	21160250	21160392	+	4.7	0.722	Intergenic	Intergenic	-3743	3743	NM_152914	256302	Hs.654713	NM_152914	ENSG00000154035	C17orf103	C17orf103	Gtlf3b	chromosome 17 open reading frame 103	protein-coding	4.7	0.722	11	10	2	4.94	5.11e-05	7.63	1.26e-06	0.97
chr17-135	chr17	41866163	41866303	+	4.8	0.909	Intergenic	L1MDa|LINE|L1	8430	8430	NM_001136483	284067	Hs.252707	NM_001136483	ENSG00000231256	C17orf105	C17orf105	-	chromosome 17 open reading frame 105	protein-coding	4.8	0.909	10	9	1.8	5.09	9.58e-05	8.23	2.31e-06	0.97
chr17-174	chr17	8094991	8095131	+	4.8	0.692	Intergenic	Intergenic	-1497	1497	NM_017622	54785	Hs.129563	NM_017622	ENSG00000196544	C17orf59	C17orf59	PRO2472	chromosome 17 open reading frame 59	protein-coding	4.8	0.692	9	9	1.8	5.09	9.58e-05	7.37	5.58e-06	0.97
chr17-201	chr17	58519678	58519820	+	5.1	0.75	TTS (NM_006380)	TTS (NM_006380)	19884	19884	NM_181707	124773	Hs.129312	NM_181707	ENSG00000141371	C17orf64	C17orf64	-	chromosome 17 open reading frame 64	protein-coding	5.1	0.75	11	11	2	5.44	9.23e-06	10.61	1.45e-08	0.97
chr18-80	chr18	33552735	33552877	+	4.7	0.769	5' UTR (NM_001201475, exon 1 of 4)	5' UTR (NM_001201475, exon 1 of 4)	218	218	NM_001201474	83608	Hs.37883	NM_001201474	ENSG00000141428	C18orf21	C18orf21	HsT3108|PNAS-131|XTP13	chromosome 18 open reading frame 21	protein-coding	4.7	0.769	10	10	2	4.94	5.11e-05	6.74	3.73e-06	0.97
chr18-25	chr18	43823328	43823468	+	6.3	0.857	intron (NM_145055, intron 3 of 4)	intron (NM_145055, intron 3 of 4)	69410	69410	NM_145055	147339	Hs.116486	NM_001008239	ENSG00000152242	C18orf25	C18orf25	ARKL1	chromosome 18 open reading frame 25	protein-coding	6.3	0.857	12	12	1.8	6.79	3.83e-07	9.5	1.08e-08	0.96
chr19-42	chr19	16607570	16607710	+	4.8	0.667	promoter-TSS (NM_145046)	promoter-TSS (NM_145046)	435	435	NM_032207	84167	Hs.631627	NM_032207	ENSG00000105072	C19orf44	C19orf44	-	chromosome 19 open reading frame 44	protein-coding	4.8	0.667	9	9	1.8	5.09	9.58e-05	10.18	3.74e-07	0.97
chr2-130	chr2	68258889	68259029	+	4.8	0.786	Intergenic	Intergenic	31200	31200	NM_173177	10438	Hs.697447	NM_001190263	ENSG00000197223	C1D	C1D	LRP1|SUN-CoR|SUNCOR|hC1D	C1D nuclear receptor corepressor	protein-coding	4.8	0.786	10	9	1.8	5.09	9.58e-05	8.13	2.56e-06	0.97
chr7-198	chr7	7368453	7368593	+	4.8	0.9	Intergenic	L2c|LINE|L2	146277	146277	NM_020156	56913	Hs.239666	NM_020156	ENSG00000106392	C1GALT1	C1GALT1	C1GALT|T-synthase	core 1 synthase, glycoprotein-N-acetylgalactosamine 3-beta-galactosyltransferase, 1	protein-coding	4.8	0.9	9	9	1.8	5.09	9.58e-05	7.2	6.69e-06	0.97
chr1-734	chr1	244507533	244507675	+	4.7	0.909	Intergenic	Intergenic	-8333	8333	NM_001012970	200159	Hs.442703	NM_001012970	ENSG00000173728	C1orf100	C1orf100	-	chromosome 1 open reading frame 100	protein-coding	4.7	0.909	10	10	2	4.94	5.11e-05	5.69	1.58e-05	0.97
chr1-535	chr1	169394848	169394988	+	4.8	0.769	intron (NM_021179, intron 1 of 5)	intron (NM_021179, intron 1 of 5)	1752	1752	NM_021179	57821	Hs.567557	NM_021179	ENSG00000117477	C1orf114	C1orf114	RP1-206D15.2	chromosome 1 open reading frame 114	protein-coding	4.8	0.769	9	9	1.8	5.09	9.58e-05	10.18	3.74e-07	0.97
chr1-265	chr1	220848989	220849131	+	5.1	0.65	Intergenic	Intergenic	-14568	14568	NM_024709	79762	Hs.519839	NM_024709	ENSG00000162817	C1orf115	C1orf115	RP11-322F10.4	chromosome 1 open reading frame 115	protein-coding	5.1	0.65	11	11	2.4	4.55	4.58e-05	7.49	4.52e-07	0.97
chr1-18	chr1	207201048	207201188	+	7.4	0.75	intron (NM_023938, intron 1 of 3)	intron (NM_023938, intron 1 of 3)	4983	4983	NM_023938	79098	Hs.32417	NM_001083924	ENSG00000182795	C1orf116	C1orf116	SARG	chromosome 1 open reading frame 116	protein-coding	7.4	0.75	15	14	3.3	4.22	1.03e-05	5.24	8.99e-07	0.95
chr1-119	chr1	221642781	221642923	+	5.6	0.857	Intergenic	Intergenic	-133214	133214	NR_024236	400804	Hs.722626	NR_024236		C1orf140	C1orf140	-	uncharacterized LOC400804	miscRNA	5.6	0.857	12	12	2	5.93	1.53e-06	6.56	5.47e-07	0.96
chr1-559	chr1	184378078	184378218	+	4.8	0.769	intron (NM_030806, intron 1 of 5)	intron (NM_030806, intron 1 of 5)	21998	21998	NM_030806	81563	Hs.741286	NM_030806	ENSG00000116667	C1orf21	C1orf21	PIG13	chromosome 1 open reading frame 21	protein-coding	4.8	0.769	9	9	1.8	5.09	9.58e-05	10.06	4.13e-07	0.97
chr1-171	chr1	85729591	85729733	+	5.1	0.786	Intergenic	L1M5|LINE|L1	-4307	4307	NR_024113	148423	Hs.26226	NM_198077	ENSG00000162642	C1orf52	C1orf52	RP11-234D19.1|gm117	chromosome 1 open reading frame 52	protein-coding	5.1	0.786	11	11	2	5.44	9.23e-06	8.68	1.07e-07	0.97
chr1-123	chr1	223704960	223705102	+	5.1	0.65	Intergenic	L2a|LINE|L2	138316	138316	NM_152610	164127	Hs.192090	NM_152610	ENSG00000178395	C1orf65	C1orf65	RP11-76K24.1	chromosome 1 open reading frame 65	protein-coding	5.1	0.65	12	11	2	5.44	9.23e-06	8.3	1.65e-07	0.97
chr1-214	chr1	200341158	200341300	+	4.7	0.733	intron (NR_040064, intron 2 of 4)	intron (NR_040064, intron 2 of 4)	1691	1691	NR_040064	554279	Hs.575858	NR_040064		C1orf98	C1orf98	-	chromosome 1 open reading frame 98	miscRNA	4.7	0.733	11	10	2	4.94	5.11e-05	7.16	2.21e-06	0.97
chr5-6026	chr5	34059181	34059323	+	4.7	0.706	intron (NR_037951, intron 1 of 8)	MLT1B|LTR|ERVL-MaLR	-15881	15881	NM_181435	114899	Hs.171929	NM_030945	ENSG00000082196	C1QTNF3	C1QTNF3	C1ATNF3|CORCS|CORS|CORS-26|CORS26|CTRP3	C1q and tumor necrosis factor related protein 3	protein-coding	4.7	0.706	10	10	2	4.94	5.11e-05	4.89	5.59e-05	0.97
chr5-3206	chr5	34353737	34353879	+	5.1	0.846	Intergenic	Intergenic	-229175	229175	NR_037951	100534612	Hs.171929	NR_037951		C1QTNF3-AMACR	C1QTNF3-AMACR	-	C1QTNF3-AMACR readthrough	miscRNA	5.1	0.846	11	11	2	5.44	9.23e-06	10.87	1.13e-08	0.97
chr22-34	chr22	37585569	37585709	+	4.8	0.692	Intergenic	MER41-int|LTR|ERV1	-1309	1309	NM_031910	114904	Hs.22011	NM_031910	ENSG00000133466	C1QTNF6	C1QTNF6	CTRP6|ZACRP6	C1q and tumor necrosis factor related protein 6	protein-coding	4.8	0.692	9	9	1.8	5.09	9.58e-05	6.97	8.71e-06	0.97
chr20-202	chr20	31062918	31063058	+	5.3	0.667	intron (NM_001256798, intron 4 of 10)	intron (NM_001256798, intron 4 of 10)	8397	8397	NM_080616	140688	Hs.729596	NM_001256798	ENSG00000197183	C20orf112	C20orf112	C20orf113|dJ1184F4.2|dJ1184F4.4	chromosome 20 open reading frame 112	protein-coding	5.3	0.667	10	10	1.8	5.66	1.66e-05	5.42	2.39e-05	0.97
chr20-31	chr20	35808741	35808881	+	6.9	0.737	promoter-TSS (NM_213632)	promoter-TSS (NM_213632)	-837	837	NM_213631	140699	Hs.349125	NM_152503	ENSG00000101353	C20orf132	C20orf132	C20orf131|dJ621N11.3|dJ621N11.4	chromosome 20 open reading frame 132	protein-coding	6.9	0.737	13	13	2.7	4.9	4.48e-06	6.27	3.09e-07	0.96
chr20-754	chr20	55030363	55030505	+	4.7	0.769	intron (NM_001164114, intron 5 of 5)	intron (NM_001164114, intron 5 of 5)	-13213	13213	NM_016407	51507	Hs.517134	NM_016407	ENSG00000022277	C20orf43	C20orf43	CDAO5|HSPC164|SHUJUN-3	chromosome 20 open reading frame 43	protein-coding	4.7	0.769	10	10	2	4.94	5.11e-05	6.94	2.88e-06	0.97
chr20-74	chr20	56687709	56687849	+	5.8	0.737	Intergenic	MLT1J2|LTR|ERVL-MaLR	-38204	38204	NM_178456	128602	Hs.43977	NM_178456	ENSG00000124237	C20orf85	C20orf85	LLC1|bA196N14.1	chromosome 20 open reading frame 85	protein-coding	5.8	0.737	12	11	2	5.53	7.92e-06	4.43	5.84e-05	0.97
chr20-371	chr20	10519774	10519916	+	4.7	0.769	intron (NM_001009608, intron 2 of 7)	intron (NM_001009608, intron 2 of 7)	103894	103894	NM_001009608	128710	Hs.668782	NM_001009608	ENSG00000149346	C20orf94	C20orf94	bA204H22.1|bA254M13.1|dJ1099D15.3	chromosome 20 open reading frame 94	protein-coding	4.7	0.769	10	10	2	4.94	5.11e-05	7.01	2.64e-06	0.97
chr21-79	chr21	19204082	19204222	+	4.8	0.833	Intergenic	MLT1L|LTR|ERVL-MaLR	-12449	12449	NM_001100421	54149	Hs.293811	NM_001100420	ENSG00000154642	C21orf91	C21orf91	C21orf14|C21orf38|CSSG1|EURL|YG81	chromosome 21 open reading frame 91	protein-coding	4.8	0.833	9	9	1.8	5.09	9.58e-05	9.19	8.6e-07	0.97
chr22-21	chr22	24860883	24861023	+	4.8	0.526	intron (NR_028483, intron 3 of 7)	Tigger3b|DNA|TcMar-Tigger	29830	29830	NR_028484	646023	Hs.632761	NR_028483		C22orf45	C22orf45	-	chromosome 22 open reading frame 45	miscRNA	4.8	0.526	9	9	1.8	5.09	9.58e-05	8.45	1.87e-06	0.97
chr2-338	chr2	101870567	101870707	+	4.8	0.667	intron (NM_017546, intron 1 of 6)	intron (NM_017546, intron 1 of 6)	1292	1292	NM_017546	55571	Hs.593973	NM_017546	ENSG00000158435	C2orf29	C2orf29	-	chromosome 2 open reading frame 29	protein-coding	4.8	0.667	9	9	1.8	5.09	9.58e-05	5.33	6.85e-05	0.97
chr2-55	chr2	105953311	105953453	+	6.1	0.667	promoter-TSS (NM_024093)	promoter-TSS (NM_024093)	-631	631	NM_024093	79074	Hs.549577	NM_024093	ENSG00000135974	C2orf49	C2orf49	asw	chromosome 2 open reading frame 49	protein-coding	6.1	0.667	14	13	2	6.43	2.36e-07	6.18	3.62e-07	0.96
chr2-258	chr2	47371326	47371466	+	4.8	0.625	intron (NM_173649, intron 3 of 4)	intron (NM_173649, intron 3 of 4)	11121	11121	NM_173649	285051	Hs.531575	NM_001163561	ENSG00000239605	C2orf61	C2orf61	-	chromosome 2 open reading frame 61	protein-coding	4.8	0.625	9	9	1.8	5.09	9.58e-05	9.9	4.69e-07	0.97
chr3-359	chr3	157277959	157278099	+	4.8	0.75	intron (NM_001099777, intron 2 of 4)	L1ME1|LINE|L1	16896	16896	NM_001130002	152078	Hs.259046	NM_001099777	ENSG00000174899	C3orf55	C3orf55	-	chromosome 3 open reading frame 55	protein-coding	4.8	0.75	9	9	1.8	5.09	9.58e-05	8.93	1.2e-06	0.97
chr3-340	chr3	144437663	144437803	+	4.8	0.9	Intergenic	L1MA8|LINE|L1	745566	745566	NM_001134470	205428	Hs.288954	NM_001134470	ENSG00000181744	C3orf58	C3orf58	DIA1	chromosome 3 open reading frame 58	protein-coding	4.8	0.9	9	9	1.8	5.09	9.58e-05	9.06	9.65e-07	0.97
chr3-56	chr3	58983706	58983848	+	5.1	0.75	intron (NM_198463, intron 4 of 15)	intron (NM_198463, intron 4 of 15)	51938	51938	NM_198463	200844	Hs.368434	NM_198463	ENSG00000163689	C3orf67	C3orf67	-	chromosome 3 open reading frame 67	protein-coding	5.1	0.75	11	11	2	5.44	9.23e-06	6.76	1.21e-06	0.97
chr3-364	chr3	159829474	159829614	+	4.8	0.75	Intergenic	Intergenic	-113879	113879	NM_001168214	401097	Hs.729755	NM_001168214	ENSG00000180044	C3orf80	C3orf80	-	chromosome 3 open reading frame 80	protein-coding	4.8	0.75	9	9	1.8	5.09	9.58e-05	10.18	3.74e-07	0.97
chr1-52	chr1	207378646	207378786	+	6.3	0.7	Intergenic	MLT1J2|LTR|ERVL-MaLR	101109	101109	NM_000715	722	Hs.1012	NM_000715	ENSG00000123838	C4BPA	C4BPA	C4BP|PRP	complement component 4 binding protein, alpha	protein-coding	6.3	0.7	12	12	2	6.03	1.29e-06	13.58	1.96e-10	0.96
chr4-256	chr4	76501844	76501984	+	4.8	0.818	3' UTR (NM_003948, exon 12 of 12)	3' UTR (NM_003948, exon 12 of 12)	20656	20656	NR_046429	152816	Hs.24510	NM_001206981	ENSG00000174792	C4orf26	C4orf26	-	chromosome 4 open reading frame 26	protein-coding	4.8	0.818	9	9	1.8	5.09	9.58e-05	8.93	1.2e-06	0.97
chr4-311	chr4	120222018	120222158	+	4.8	0.846	promoter-TSS (NM_001001701)	promoter-TSS (NM_001001701)	-120	120	NM_001001701	401152	Hs.741263	NM_001001701	ENSG00000164096	C4orf3	C4orf3	-	chromosome 4 open reading frame 3	protein-coding	4.8	0.846	9	9	1.8	5.09	9.58e-05	7.12	7.31e-06	0.97
chr4-259	chr4	113021196	113021338	+	4.7	0.867	Intergenic	MER49|LTR|ERV1	-45286	45286	NM_152400	132720	Hs.23439	NM_152400	ENSG00000174749	C4orf32	C4orf32	-	chromosome 4 open reading frame 32	protein-coding	4.7	0.867	10	10	2	4.94	5.11e-05	6.04	9.61e-06	0.97
chr4-126	chr4	131739095	131739235	+	5.3	0.909	Intergenic	Intergenic	1721883	1721883	NM_001099783	132321	Hs.567679	NM_001099783	ENSG00000151470	C4orf33	C4orf33	-	chromosome 4 open reading frame 33	protein-coding	5.3	0.909	10	10	1.8	5.66	1.66e-05	7.41	1.62e-06	0.97
chr4-292	chr4	159948920	159949062	+	4.7	0.769	intron (NM_152543, intron 1 of 4)	intron (NM_152543, intron 1 of 4)	7342	7342	NM_152543	152940	Hs.415576	NM_152543	ENSG00000164123	C4orf45	C4orf45	-	chromosome 4 open reading frame 45	protein-coding	4.7	0.769	10	10	2	4.94	5.11e-05	9.13	2.53e-07	0.97
chr4-41	chr4	146728918	146729058	+	5.8	0.857	intron (NM_178835, intron 8 of 14)	intron (NM_178835, intron 8 of 14)	127632	127632	NM_001080531	646603	Hs.452865	NM_001080531	ENSG00000237136	C4orf51	C4orf51	-	chromosome 4 open reading frame 51	protein-coding	5.8	0.857	12	11	1.8	6.22	2.63e-06	9.01	7.4e-08	0.97
chr9-71	chr9	123767759	123767901	+	5.1	0.722	intron (NM_001735, intron 20 of 40)	L2|LINE|L2	44724	44724	NM_001735	727	Hs.494997	NM_001735	ENSG00000106804	C5	C5	CPAMD4	complement component 5	protein-coding	5.1	0.722	12	11	2	5.44	9.23e-06	6.7	1.31e-06	0.97
chr5-1622	chr5	31581560	31581702	+	5.6	0.56	Intergenic	Intergenic	49258	49258	NM_018356	55322	Hs.519246	NM_018356	ENSG00000082213	C5orf22	C5orf22	-	chromosome 5 open reading frame 22	protein-coding	5.6	0.56	12	12	2	5.93	1.53e-06	4.76	1.37e-05	0.96
chr5-94	chr5	2771688	2771830	+	7	0.826	Intergenic	L1ME2|LINE|L1	19497	19497	NM_178569	153571	Hs.668017	NM_178569	ENSG00000186493	C5orf38	C5orf38	CEI|IRX2NB	chromosome 5 open reading frame 38	protein-coding	7	0.826	15	15	4	3.72	2.16e-05	4.07	7.85e-06	0.95
chr5-1670	chr5	37139262	37139404	+	5.1	0.571	intron (NM_023073, intron 44 of 51)	intron (NM_023073, intron 44 of 51)	110197	110197	NM_023073	65250	Hs.586199	NM_023073	ENSG00000197603	C5orf42	C5orf42	JBTS17	chromosome 5 open reading frame 42	protein-coding	5.1	0.571	12	11	2	5.44	9.23e-06	4.74	3.17e-05	0.97
chr5-7008	chr5	147352207	147352347	+	4.8	0.75	Intergenic	Tigger3b|DNA|TcMar-Tigger	-66176	66176	NM_206966	389336	Hs.660038	NM_206966	ENSG00000178776	C5orf46	C5orf46	-	chromosome 5 open reading frame 46	protein-coding	4.8	0.75	9	9	1.8	5.09	9.58e-05	6.4	1.68e-05	0.97
chr5-1909	chr5	7730513	7730655	+	5.1	0.706	intron (NM_020546, intron 14 of 24)	L1MEd|LINE|L1	121019	121019	NM_001089584	134121	Hs.709979	NM_001089584	ENSG00000215217	C5orf49	C5orf49	-	chromosome 5 open reading frame 49	protein-coding	5.1	0.706	11	11	2	5.44	9.23e-06	4.93	2.26e-05	0.97
chr5-907	chr5	159827381	159827523	+	6.1	0.75	promoter-TSS (NM_022090)	promoter-TSS (NM_022090)	-392	392	NM_022090	63920	Hs.529464	NM_022090	ENSG00000221886	C5orf54	C5orf54	Buster3	chromosome 5 open reading frame 54	protein-coding	6.1	0.75	13	13	2	6.43	2.36e-07	6.14	3.91e-07	0.96
chr5-148	chr5	387326	387466	+	6.9	0.727	intron (NM_001242412, intron 4 of 10)	L1MC4|LINE|L1	55862	55862	NM_138464	116349	Hs.446702	NM_138464	ENSG00000221990	C5orf55	C5orf55	-	chromosome 5 open reading frame 55	protein-coding	6.9	0.727	13	13	2	6.53	1.96e-07	4.4	1.37e-05	0.96
chr5-1746	chr5	41380013	41380155	+	5.6	0.75	intron (NM_001005473, intron 2 of 2)	intron (NM_001005473, intron 2 of 2)	-118544	118544	NM_001115131	729	Hs.481992	NM_000065	ENSG00000039537	C6	C6	-	complement component 6	protein-coding	5.6	0.75	12	12	2	5.93	1.53e-06	4.9	1.03e-05	0.96
chr6-328	chr6	120898695	120898835	+	4.8	0.692	Intergenic	L2a|LINE|L2	756879	756879	NM_152730	221322	Hs.121396	NM_152730	ENSG00000146350	C6orf170	C6orf170	BROMI|C6orf171|bA301B7.2|bA57L9.1|dJ310J6.1	chromosome 6 open reading frame 170	protein-coding	4.8	0.692	9	9	1.8	5.09	9.58e-05	9.06	9.65e-07	0.97
chr6-190	chr6	2675296	2675436	+	4.8	0.818	intron (NM_001012418, intron 10 of 12)	intron (NM_001012418, intron 10 of 12)	-40068	40068	NM_152554	154386	Hs.680574	NM_152554	ENSG00000164385	C6orf195	C6orf195	RP11-145H9.2|bA145H9.2	chromosome 6 open reading frame 195	protein-coding	4.8	0.818	9	9	1.8	5.09	9.58e-05	10.18	3.74e-07	0.97
chr7-387	chr7	109062353	109062493	+	4.8	0.692	Intergenic	L1MC3|LINE|L1	-537786	537786	NM_001024607	154907	Hs.638689	NM_001024607	ENSG00000205174	C7orf66	C7orf66	-	chromosome 7 open reading frame 66	protein-coding	4.8	0.692	9	9	1.8	5.09	9.58e-05	10.18	3.74e-07	0.97
chr8-595	chr8	40033150	40033290	+	4.8	0.667	Intergenic	Intergenic	22233	22233	NM_020130	56892	Hs.740580	NM_020130	ENSG00000176907	C8orf4	C8orf4	TC-1|TC1	chromosome 8 open reading frame 4	protein-coding	4.8	0.667	9	9	1.8	5.09	9.58e-05	5.61	4.63e-05	0.97
chr8-253	chr8	96210734	96210876	+	5.1	0.8	Intergenic	Intergenic	17797	17797	NR_046232	619344	Hs.741630	NR_046232		C8orf69	C8orf69	-	uncharacterized LOC619344	miscRNA	5.1	0.8	11	11	2	5.44	9.23e-06	6.01	3.63e-06	0.97
chr8-80	chr8	124261091	124261233	+	5.6	0.684	non-coding (NR_037874, exon 3 of 3)	non-coding (NR_037874, exon 3 of 3)	-7524	7524	NM_032847	84933	Hs.707401	NM_032847	ENSG00000189376	C8orf76	C8orf76	-	chromosome 8 open reading frame 76	protein-coding	5.6	0.684	13	12	2	5.93	1.53e-06	4.27	3.85e-05	0.96
chr8-640	chr8	94432816	94432956	+	4.8	0.818	intron (NR_033858, intron 7 of 10)	intron (NR_033858, intron 7 of 10)	-253807	253807	NM_001242668	389676	Hs.386711	NM_001242668	ENSG00000254318	C8orf87	C8orf87	-	chromosome 8 open reading frame 87	protein-coding	4.8	0.818	9	9	1.8	5.09	9.58e-05	10.18	3.74e-07	0.97
chr9-475	chr9	132090507	132090647	+	4.8	0.909	Intergenic	Intergenic	7282	7282	NM_001012715	414318	Hs.449434	NM_001012715		C9orf106	C9orf106	bA65J3.5	chromosome 9 open reading frame 106	protein-coding	4.8	0.909	9	9	1.8	5.09	9.58e-05	5.76	3.78e-05	0.97
chr9-167	chr9	130462044	130462186	+	5.1	0.647	Intergenic	MIR|SINE|MIR	-7156	7156	NM_001012502	286207	Hs.652519	NM_001012502	ENSG00000160401	C9orf117	C9orf117	-	chromosome 9 open reading frame 117	protein-coding	5.1	0.647	11	11	2	5.44	9.23e-06	6.88	1.02e-06	0.97
chr9-311	chr9	21901093	21901235	+	4.7	0.812	Intergenic	L1PA15|LINE|L1	-65974	65974	NR_024274	51198	Hs.721053	NM_016349		C9orf53	C9orf53	bA149I2.3	chromosome 9 open reading frame 53	miscRNA	4.7	0.812	10	10	2	4.94	5.11e-05	6.74	3.73e-06	0.97
chr2-115	chr2	231615465	231615607	+	5.1	0.636	intron (NM_001130849, intron 1 of 8)	MIRb|SINE|MIR	37273	37273	NM_001130849	51719	Hs.603930	NM_001130849	ENSG00000135932	CAB39	CAB39	MO25	calcium binding protein 39	protein-coding	5.1	0.636	12	11	2.4	4.55	4.58e-05	6.26	2.49e-06	0.97
chr18-87	chr18	20711988	20712128	+	4.8	0.75	Intergenic	MIRb|SINE|MIR	-2470	2470	NM_001256438	91768	Hs.11108	NM_001100619	ENSG00000134508	CABLES1	CABLES1	CABL1|CABLES|HsT2563|IK3-1	Cdk5 and Abl enzyme substrate 1	protein-coding	4.8	0.75	9	9	1.8	5.09	9.58e-05	7.92	3.14e-06	0.97
chr18-22	chr18	21717387	21717529	+	6.6	0.895	Intergenic	Intergenic	-1497	1497	NM_153770	26256	Hs.511983	NM_012189	ENSG00000154040	CABYR	CABYR	CABYRa|CABYRc|CABYRc/d|CABYRe|CBP86|CT88|FSP-2|FSP2	calcium binding tyrosine-(Y)-phosphorylation regulated	protein-coding	6.6	0.895	16	14	2	6.92	3.37e-08	8.76	1.85e-09	0.96
chr7-173	chr7	93192732	93192872	+	5.3	0.857	intron (NM_001164737, intron 2 of 15)	intron (NM_001164737, intron 2 of 15)	-3680	3680	NM_001164738	799	Hs.489127	NM_001164737	ENSG00000004948	CALCR	CALCR	CRT|CT-R|CTR|CTR1	calcitonin receptor	protein-coding	5.3	0.857	10	10	1.8	5.66	1.66e-05	7.41	1.62e-06	0.97
chr2-125	chr2	44589945	44590087	+	5.1	0.706	intron (NM_024766, intron 1 of 10)	intron (NM_024766, intron 1 of 10)	973	973	NM_024766	79823	Hs.468349	NM_024766	ENSG00000143919	CAMKMT	CAMKMT	C2orf34|CLNMT|CaM KMT|Cam|KMT	calmodulin-lysine N-methyltransferase	protein-coding	5.1	0.706	11	11	2	5.44	9.23e-06	9.09	6.76e-08	0.97
chr1-31	chr1	6929074	6929216	+	5.6	0.875	intron (NM_015215, intron 3 of 22)	intron (NM_015215, intron 3 of 22)	83761	83761	NR_038934	23261	Hs.671020	NM_001195563	ENSG00000171735	CAMTA1	CAMTA1	CANPMR	calmodulin binding transcription activator 1	protein-coding	5.6	0.875	13	12	2	5.93	1.53e-06	7.24	1.95e-07	0.96
chr5-3577	chr5	179125155	179125297	+	4.7	0.684	promoter-TSS (NM_001024649)	promoter-TSS (NM_001024649)	-704	704	NM_001024649	821	Hs.567968	NM_001024649	ENSG00000127022	CANX	CANX	CNX|IP90|P90	calnexin	protein-coding	4.7	0.684	11	10	2	4.94	5.11e-05	5.34	2.7e-05	0.97
chr1-145	chr1	40505778	40505918	+	5.3	0.667	promoter-TSS (NM_006367)	promoter-TSS (NM_006367)	-407	407	NM_001105530	10487	Hs.713078	NM_001105530	ENSG00000131236	CAP1	CAP1	CAP|CAP1-PEN	CAP, adenylate cyclase-associated protein 1 (yeast)	protein-coding	5.3	0.667	10	10	1.8	5.66	1.66e-05	6.52	4.96e-06	0.97
chr2-136	chr2	85648073	85648213	+	4.8	0.706	Intergenic	Intergenic	-6946	6946	NM_001256139	822	Hs.516155	NM_001256139	ENSG00000042493	CAPG	CAPG	AFCP|MCP	capping protein (actin filament), gelsolin-like	protein-coding	4.8	0.706	10	9	1.8	5.09	9.58e-05	7.73	3.82e-06	0.97
chr1-636	chr1	223914881	223915023	+	4.7	0.765	intron (NM_001748, intron 2 of 20)	intron (NM_001748, intron 2 of 20)	14833	14833	NM_001748	824	Hs.350899	NM_001146068	ENSG00000162909	CAPN2	CAPN2	CANP2|CANPL2|CANPml|mCANP	calpain 2, (m/II) large subunit	protein-coding	4.7	0.765	10	10	2	4.94	5.11e-05	4.57	9.71e-05	0.97
chrX-93	chrX	110569632	110569772	+	5.3	0.706	intron (NM_178151, intron 5 of 6)	intron (NM_178151, intron 5 of 6)	-55928	55928	NM_014289	827	Hs.496593	NM_014289	ENSG00000077274	CAPN6	CAPN6	CANPX|CAPNX|CalpM|DJ914P14.1	calpain 6	protein-coding	5.3	0.706	10	10	1.8	5.66	1.66e-05	6.64	4.22e-06	0.97
chr7-404	chr7	116420944	116421084	+	4.8	0.692	intron (NM_001127500, intron 17 of 20)	MER74A|LTR|ERVL	-81549	81549	NM_006136	830	Hs.446123	NM_006136	ENSG00000198898	CAPZA2	CAPZA2	CAPPA2|CAPZ	capping protein (actin filament) muscle Z-line, alpha 2	protein-coding	4.8	0.692	9	9	1.8	5.09	9.58e-05	5.87	3.28e-05	0.97
chrX-137	chrX	41778367	41778507	+	4.8	0.692	intron (NM_001126055, intron 1 of 24)	L2c|LINE|L2	3850	3850	NM_001126055	8573	Hs.495984	NM_001126054	ENSG00000147044	CASK	CASK	CAGH39|CAMGUK|CMG|FGS4|LIN2|MICPCH|MRXSNA|TNRC8	calcium/calmodulin-dependent serine protein kinase (MAGUK family)	protein-coding	4.8	0.692	9	9	1.8	5.09	9.58e-05	8.34	2.08e-06	0.97
chr2-107	chr2	202096822	202096962	+	4.8	0.769	Intergenic	LTR41|LTR|ERVL	-1274	1274	NM_033355	841	Hs.599762	NM_001080124	ENSG00000064012	CASP8	CASP8	ALPS2B|CAP4|Casp-8|FLICE|MACH|MCH5	caspase 8, apoptosis-related cysteine peptidase	protein-coding	4.8	0.769	11	9	1.8	5.09	9.58e-05	6.04	2.65e-05	0.97
chr6-123	chr6	90539069	90539209	+	5.3	0.909	promoter-TSS (NM_012115)	promoter-TSS (NM_012115)	-480	480	NM_012115	9994	Hs.558218	NM_001137667		CASP8AP2	CASP8AP2	CED-4|FLASH|RIP25	caspase 8 associated protein 2	protein-coding	5.3	0.909	10	10	1.8	5.66	1.66e-05	11.32	3.31e-08	0.97
chr1-475	chr1	116331015	116331155	+	4.8	0.8	Intergenic	L1ME1|LINE|L1	-19659	19659	NM_001232	845	Hs.57975	NM_001232	ENSG00000118729	CASQ2	CASQ2	PDIB2	calsequestrin 2 (cardiac muscle)	protein-coding	4.8	0.8	9	9	1.8	5.09	9.58e-05	6.67	1.22e-05	0.97
chr5-1577	chr5	96045620	96045760	+	5.3	0.706	intron (NM_173060, intron 1 of 28)	intron (NM_173060, intron 1 of 28)	7197	7197	NM_173060	831	Hs.436186	NM_001042440	ENSG00000153113	CAST	CAST	BS-17	calpastatin	protein-coding	5.3	0.706	11	10	1.8	5.66	1.66e-05	6.46	5.37e-06	0.97
chr3-50	chr3	8743745	8743885	+	5.3	0.786	Intergenic	SATR2|Satellite|Satellite	-31671	31671	NM_033337	859	Hs.98303	NM_001234	ENSG00000182533	CAV3	CAV3	LGMD1C|LQT9|VIP-21|VIP21	caveolin 3	protein-coding	5.3	0.786	10	10	1.8	5.66	1.66e-05	11.32	3.31e-08	0.97
chr20-423	chr20	32133454	32133596	+	4.7	0.625	intron (NM_001032999, intron 1 of 10)	AluSq2|SINE|Alu	-16646	16646	NM_001039709	9139	Hs.153934	NM_001032999	ENSG00000078699	CBFA2T2	CBFA2T2	EHT|MTGR1|ZMYND3|p85	core-binding factor, runt domain, alpha subunit 2; translocated to, 2	protein-coding	4.7	0.625	10	10	2	4.94	5.11e-05	4.66	8.27e-05	0.97
chr16-180	chr16	67090017	67090157	+	5.3	0.647	intron (NM_022845, intron 3 of 5)	MER82|DNA|TcMar-Tigger	27037	27037	NM_022845	865	Hs.460988	NM_001755	ENSG00000067955	CBFB	CBFB	PEBP2B	core-binding factor, beta subunit	protein-coding	5.3	0.647	10	10	1.8	5.66	1.66e-05	7.11	2.33e-06	0.97
chr16-141	chr16	49343367	49343507	+	4.8	0.706	Intergenic	L1ME3C|LINE|L1	-27695	27695	NM_004352	869	Hs.458423	NM_004352	ENSG00000102924	CBLN1	CBLN1	-	cerebellin 1 precursor	protein-coding	4.8	0.706	10	9	1.8	5.09	9.58e-05	7.37	5.58e-06	0.97
chr20-380	chr20	54308248	54308388	+	5.3	0.846	Intergenic	Intergenic	272210	272210	NM_080617	140689	Hs.741877	NM_080617	ENSG00000054803	CBLN4	CBLN4	CBLNL1	cerebellin 4 precursor	protein-coding	5.3	0.846	10	10	1.8	5.66	1.66e-05	6.84	3.29e-06	0.97
chr17-440	chr17	77819124	77819266	+	4.7	0.833	Intergenic	Intergenic	-5982	5982	NM_003655	8535	Hs.405046	NM_003655	ENSG00000141582	CBX4	CBX4	NBP16|PC2	chromobox homolog 4	protein-coding	4.7	0.833	10	10	2	4.94	5.11e-05	9.89	1.24e-07	0.97
chr22-10	chr22	39571255	39571395	+	5.3	0.769	Intergenic	Intergenic	-22787	22787	NM_175709	23492	Hs.356416	NM_175709	ENSG00000100307	CBX7	CBX7	-	chromobox homolog 7	protein-coding	5.3	0.769	10	10	2	5.03	4.45e-05	7.34	1.78e-06	0.97
chr2-237	chr2	55783002	55783144	+	4.7	0.714	intron (NM_020463, intron 14 of 14)	intron (NM_020463, intron 14 of 14)	36333	36333	NM_080667	112942	Hs.264208	NM_080667	ENSG00000163001	CCDC104	CCDC104	-	coiled-coil domain containing 104	protein-coding	4.7	0.714	10	10	2	4.94	5.11e-05	8.47	5e-07	0.97
chr4-155	chr4	186422959	186423099	+	4.8	0.833	non-coding (NR_047562, exon 6 of 6)	non-coding (NR_047562, exon 6 of 6)	-30116	30116	NM_152775	256309	Hs.41101	NM_001145411	ENSG00000168491	CCDC110	CCDC110	CT52|KM-HN-1|KMHN1	coiled-coil domain containing 110	protein-coding	4.8	0.833	10	9	1.8	5.09	9.58e-05	6.34	1.82e-05	0.97
chr4-152	chr4	185580458	185580598	+	4.8	0.786	exon (NM_152683, exon 4 of 14)	exon (NM_152683, exon 4 of 14)	9761	9761	NM_152683	201973	Hs.481307	NM_152683	ENSG00000164306	CCDC111	CCDC111	-	coiled-coil domain containing 111	protein-coding	4.8	0.786	10	9	1.8	5.09	9.58e-05	6.4	1.68e-05	0.97
chr2-445	chr2	131087422	131087562	+	4.8	0.833	Intergenic	Intergenic	12430	12430	NM_032357	84317	Hs.104203	NM_032357	ENSG00000136710	CCDC115	CCDC115	ccp1	coiled-coil domain containing 115	protein-coding	4.8	0.833	9	9	1.8	5.09	9.58e-05	8.13	2.56e-06	0.97
chr19-26	chr19	18043542	18043682	+	5.3	0.8	promoter-TSS (NM_001136203)	promoter-TSS (NM_001136203)	-212	212	NM_001136203	115098	Hs.100043	NM_001136203	ENSG00000007080	CCDC124	CCDC124	-	coiled-coil domain containing 124	protein-coding	5.3	0.8	10	10	1.8	5.66	1.66e-05	10.67	5.64e-08	0.97
chr19-28	chr19	13842223	13842365	+	4.7	0.812	Intergenic	Intergenic	-16459	16459	NM_030818	81576	Hs.24998	NM_030818	ENSG00000104957	CCDC130	CCDC130	-	coiled-coil domain containing 130	protein-coding	4.7	0.812	11	10	2	4.94	5.11e-05	9.89	1.24e-07	0.97
chr17-22	chr17	20838356	20838498	+	6.1	0.633	Intergenic	L1ME3A|LINE|L1	-38974	38974	NM_001004306	339184	Hs.674830	NM_001004306	ENSG00000205212	CCDC144NL	CCDC144NL	-	coiled-coil domain containing 144 family, N-terminal like	protein-coding	6.1	0.633	14	13	2	6.43	2.36e-07	4.38	1.44e-05	0.96
chr5-1540	chr5	42729214	42729354	+	5.3	0.667	Intergenic	Intergenic	-27636	27636	NM_001134848	100129792	Hs.741384	NM_001134848	ENSG00000198865	CCDC152	CCDC152	CH5400	coiled-coil domain containing 152	protein-coding	5.3	0.667	11	10	2	5.03	4.45e-05	5.38	2.55e-05	0.97
chr9-256	chr9	15823688	15823828	+	4.8	0.833	intron (NM_173550, intron 21 of 25)	intron (NM_173550, intron 21 of 25)	270661	270661	NM_173550	203238	Hs.17267	NM_173550	ENSG00000164989	CCDC171	CCDC171	C9orf93|bA536D16.1|bA778P13.1	coiled-coil domain containing 171	protein-coding	4.8	0.833	9	9	1.8	5.09	9.58e-05	10.18	3.74e-07	0.97
chr1-212	chr1	159871056	159871196	+	5.3	0.833	Intergenic	Intergenic	-1220	1220	NM_012337	25790	Hs.647705	NM_012337	ENSG00000213085	CCDC19	CCDC19	NESG1	coiled-coil domain containing 19	protein-coding	5.3	0.833	10	10	1.8	5.66	1.66e-05	11.32	3.31e-08	0.97
chr12-53	chr12	102422738	102422878	+	4.8	0.65	intron (NM_016053, intron 5 of 6)	intron (NM_016053, intron 5 of 6)	33091	33091	NM_016053	51019	Hs.405692	NM_016053	ENSG00000120860	CCDC53	CCDC53	CGI-116	coiled-coil domain containing 53	protein-coding	4.8	0.65	10	9	1.8	5.09	9.58e-05	6.82	1.03e-05	0.97
chr10-86	chr10	61596460	61596600	+	5.8	0.929	intron (NM_005436, intron 2 of 8)	intron (NM_005436, intron 2 of 8)	69884	69884	NM_005436	8030	Hs.591360	NM_005436	ENSG00000108091	CCDC6	CCDC6	D10S170|H4|PTC|TPC|TST1	coiled-coil domain containing 6	protein-coding	5.8	0.929	11	11	1.8	6.22	2.63e-06	10.91	1.09e-08	0.97
chr19-65	chr19	46499366	46499506	+	4.8	0.643	intron (NM_001267723, intron 1 of 13)	L2|LINE|L2	717	717	NM_001267723	729440	Hs.515479	NM_001080402	ENSG00000104983	CCDC61	CCDC61	-	coiled-coil domain containing 61	protein-coding	4.8	0.643	9	9	1.8	5.09	9.58e-05	10.06	4.13e-07	0.97
chr7-180	chr7	106402713	106402853	+	5.3	0.917	Intergenic	Intergenic	-101149	101149	NM_175884	168455	Hs.740672	NM_175884	ENSG00000253276	CCDC71L	CCDC71L	C7orf74	coiled-coil domain containing 71-like	protein-coding	5.3	0.917	10	10	1.8	5.66	1.66e-05	10.84	4.91e-08	0.97
chr2-237	chr2	37331629	37331769	+	4.8	0.667	TTS (NM_001135652)	TTS (NM_001135652)	20105	20105	NM_174931	253635	Hs.595250	NM_174931	ENSG00000152133	CCDC75	CCDC75	CENP-Y|CENPY|GPATCH11	coiled-coil domain containing 75	protein-coding	4.8	0.667	9	9	1.8	5.09	9.58e-05	6.97	8.71e-06	0.97
chr3-37	chr3	112390542	112390682	+	5.3	0.706	Intergenic	MIRb|SINE|MIR	-30635	30635	NM_199511	151887	Hs.477128	NM_199511	ENSG00000091986	CCDC80	CCDC80	DRO1|SSG1|URB|okuribin	coiled-coil domain containing 80	protein-coding	5.3	0.706	11	10	1.8	5.66	1.66e-05	5.87	1.22e-05	0.97
chr2-270	chr2	56692633	56692773	+	4.8	0.818	Intergenic	L1P4a|LINE|L1	281445	281445	NM_001080433	114800	Hs.117136	NM_001080433	ENSG00000055813	CCDC85A	CCDC85A	-	coiled-coil domain containing 85A	protein-coding	4.8	0.818	9	9	1.8	5.09	9.58e-05	9.46	6.79e-07	0.97
chr12-76	chr12	28745086	28745228	+	4.7	0.846	Intergenic	Intergenic	335024	335024	NM_018318	55297	Hs.653125	NM_018318	ENSG00000123106	CCDC91	CCDC91	p56	coiled-coil domain containing 91	protein-coding	4.7	0.846	10	10	2	4.94	5.11e-05	9.78	1.37e-07	0.97
chr16-63	chr16	57375126	57375268	+	6.1	0.727	Intergenic	Intergenic	-17498	17498	NM_002990	6367	Hs.534347	NM_002990	ENSG00000102962	CCL22	CCL22	ABCD-1|DC/B-CK|MDC|SCYA22|STCP-1	chemokine (C-C motif) ligand 22	protein-coding	6.1	0.727	13	13	2	6.43	2.36e-07	5.86	6.52e-07	0.96
chr15-25	chr15	59405504	59405644	+	5.3	0.786	intron (NM_004701, intron 3 of 8)	L2a|LINE|L2	8290	8290	NM_004701	9133	Hs.194698	NM_004701	ENSG00000157456	CCNB2	CCNB2	HsT17299	cyclin B2	protein-coding	5.3	0.786	11	10	1.8	5.66	1.66e-05	8.49	4.9e-07	0.97
chr6-205	chr6	42013050	42013192	+	4.7	0.857	intron (NM_001136017, intron 1 of 4)	MIRb|SINE|MIR	3489	3489	NM_001136126	896	Hs.534307	NM_001136017	ENSG00000112576	CCND3	CCND3	-	cyclin D3	protein-coding	4.7	0.857	10	10	2	4.94	5.11e-05	7.01	2.64e-06	0.97
chr5-3431	chr5	162678515	162678655	+	4.8	0.917	Intergenic	Intergenic	-185992	185992	NM_199246	900	Hs.79101	NM_004060	ENSG00000113328	CCNG1	CCNG1	CCNG	cyclin G1	protein-coding	4.8	0.917	10	9	1.8	5.09	9.58e-05	8.02	2.84e-06	0.97
chr5-1593	chr5	159744507	159744647	+	5.8	0.8	Intergenic	MER45B|DNA|hAT-Tip100	-5004	5004	NM_024565	79616	Hs.14070	NM_024565	ENSG00000135083	CCNJL	CCNJL	-	cyclin J-like	protein-coding	5.8	0.8	11	11	1.8	6.22	2.63e-06	6.1	3.18e-06	0.97
chr2-102	chr2	135685319	135685459	+	5.8	0.846	intron (NR_037649, intron 2 of 10)	intron (NR_037649, intron 2 of 10)	8997	8997	NM_001241	905	Hs.731949	NM_001241	ENSG00000082258	CCNT2	CCNT2	CYCT2	cyclin T2	protein-coding	5.8	0.846	11	11	2	5.53	7.92e-06	9.45	4.61e-08	0.97
chr2-414	chr2	208557194	208557336	+	4.7	0.846	Intergenic	Intergenic	-18999	18999	NM_001142300	151195	Hs.597952	NM_001142300	ENSG00000163249	CCNYL1	CCNYL1	-	cyclin Y-like 1	protein-coding	4.7	0.846	10	10	2	4.94	5.11e-05	7.55	1.39e-06	0.97
chr3-47	chr3	33064858	33065000	+	5.1	0.75	intron (NM_001079811, intron 11 of 15)	intron (NM_001079811, intron 11 of 15)	71863	71863	NM_005508	1233	Hs.184926	NM_005508	ENSG00000183813	CCR4	CCR4	CC-CKR-4|CD194|CKR4|CMKBR4|ChemR13|HGCN:14099|K5-5	chemokine (C-C motif) receptor 4	protein-coding	5.1	0.75	11	11	2	5.44	9.23e-06	10.87	1.13e-08	0.97
chr17-279	chr17	38698882	38699022	+	4.8	0.733	Intergenic	Intergenic	22784	22784	NM_001838	1236	Hs.370036	NM_001838	ENSG00000126353	CCR7	CCR7	BLR2|CD197|CDw197|CMKBR7|EBI1	chemokine (C-C motif) receptor 7	protein-coding	4.8	0.733	9	9	1.8	5.09	9.58e-05	6.15	2.28e-05	0.97
chr5-22	chr5	10251016	10251158	+	8	0.75	intron (NM_012073, intron 1 of 10)	intron (NM_012073, intron 1 of 10)	805	805	NM_012073	22948	Hs.1600	NM_012073	ENSG00000150753	CCT5	CCT5	CCT-epsilon|CCTE|TCP-1-epsilon	chaperonin containing TCP1, subunit 5 (epsilon)	protein-coding	8	0.75	17	17	4.8	3.52	1.31e-05	3.71	6.61e-06	0.95
chr6-119	chr6	75066711	75066851	+	5.3	0.714	Intergenic	Intergenic	661267	661267	NM_133493	135228	Hs.399891	NM_001159587	ENSG00000156535	CD109	CD109	CPAMD7|RP11-525G3.1	CD109 molecule	protein-coding	5.3	0.714	10	10	1.8	5.66	1.66e-05	8	8.26e-07	0.97
chr5-6661	chr5	66490827	66490969	+	4.7	0.857	intron (NM_005582, intron 1 of 2)	MLT1B|LTR|ERVL-MaLR	1719	1719	NM_005582	4064	Hs.87205	NM_005582	ENSG00000134061	CD180	CD180	LY64|Ly78|RP105	CD180 molecule	protein-coding	4.7	0.857	10	10	2	4.94	5.11e-05	9.64	1.55e-07	0.97
chr3-306	chr3	112062369	112062509	+	4.8	0.9	intron (NM_001004196, intron 3 of 6)	AluJr4|SINE|Alu	10523	10523	NM_005944	4345	Hs.79015	NM_001004196	ENSG00000091972	CD200	CD200	MOX1|MOX2|MRC|OX-2	CD200 molecule	protein-coding	4.8	0.9	9	9	1.8	5.09	9.58e-05	10.18	3.74e-07	0.97
chr15-133	chr15	73952796	73952936	+	4.8	0.688	Intergenic	MLT1I-int|LTR|ERVL-MaLR	-23756	23756	NM_025240	80381	Hs.741255	NM_001024736	ENSG00000103855	CD276	CD276	4Ig-B7-H3|B7-H3|B7H3|B7RP-2	CD276 molecule	protein-coding	4.8	0.688	9	9	1.8	5.09	9.58e-05	10.18	3.74e-07	0.97
chr1-624	chr1	208194617	208194757	+	4.8	0.643	TTS (NM_025179)	TTS (NM_025179)	-110004	110004	NM_001773	947	Hs.374990	NM_001025109	ENSG00000174059	CD34	CD34	-	CD34 molecule	protein-coding	4.8	0.643	9	9	1.8	5.09	9.58e-05	7.64	4.21e-06	0.97
chr11-172	chr11	35160945	35161087	+	4.7	0.923	intron (NM_001001389, intron 1 of 16)	intron (NM_001001389, intron 1 of 16)	599	599	NM_001202556	960	Hs.502328	NM_000610	ENSG00000026508	CD44	CD44	CDW44|CSPG8|ECMR-III|HCELL|HUTCH-I|IN|LHR|MC56|MDU2|MDU3|MIC4|Pgp1	CD44 molecule (Indian blood group)	protein-coding	4.7	0.923	10	10	2	4.94	5.11e-05	4.85	5.92e-05	0.97
chr1-98	chr1	207880467	207880609	+	5.6	0.6	intron (NM_175710, intron 9 of 11)	intron (NM_175710, intron 9 of 11)	-44845	44845	NM_002389	4179	Hs.510402	NM_002389	ENSG00000117335	CD46	CD46	AHUS2|MCP|MIC10|TLX|TRA2.10	CD46 molecule, complement regulatory protein	protein-coding	5.6	0.6	12	12	2.4	4.96	9.07e-06	7.37	1.62e-07	0.96
chr3-112	chr3	107706597	107706737	+	5.3	0.667	Intergenic	MIR3|SINE|MIR	103268	103268	NM_198793	961	Hs.446414	NM_001777	ENSG00000196776	CD47	CD47	IAP|MER6|OA3	CD47 molecule	protein-coding	5.3	0.667	10	10	1.8	5.66	1.66e-05	6.71	3.89e-06	0.97
chr1-92	chr1	207482917	207483057	+	5.8	0.812	Intergenic	Intergenic	-11830	11830	NM_000574	1604	Hs.126517	NM_000574	ENSG00000196352	CD55	CD55	CR|CROM|DAF|TC	CD55 molecule, decay accelerating factor for complement (Cromer blood group)	protein-coding	5.8	0.812	11	11	2	5.53	7.92e-06	6.8	1.14e-06	0.97
chr6-203	chr6	14223813	14223953	+	4.8	0.75	Intergenic	Intergenic	106018	106018	NM_004233	9308	Hs.595133	NM_001040280	ENSG00000112149	CD83	CD83	BL11|HB15	CD83 molecule	protein-coding	4.8	0.75	9	9	1.8	5.09	9.58e-05	9.75	5.32e-07	0.97
chr20-82	chr20	23081436	23081576	+	5.8	0.786	Intergenic	Intergenic	-14529	14529	NM_012072	22918	Hs.97199	NM_012072	ENSG00000125810	CD93	CD93	C1QR1|C1qR(P)|C1qRP|CDw93|ECSM3|MXRA4|dJ737E23.1	CD93 molecule	protein-coding	5.8	0.786	11	11	1.8	6.22	2.63e-06	9.22	5.86e-08	0.97
chr17-324	chr17	45194504	45194644	+	4.8	0.667	TTS (NM_001256)	TTS (NM_001256)	72091	72091	NM_001114091	996	Hs.463295	NM_001114091	ENSG00000004897	CDC27	CDC27	ANAPC3|APC3|CDC27Hs|D0S1430E|D17S978E|HNUC|NUC2	cell division cycle 27 homolog (S. cerevisiae)	protein-coding	4.8	0.667	9	9	1.8	5.09	9.58e-05	6.74	1.12e-05	0.97
chr1-339	chr1	22366511	22366653	+	4.7	0.55	Intergenic	Intergenic	-12538	12538	NM_001791	998	Hs.467637	NM_001039802	ENSG00000070831	CDC42	CDC42	CDC42Hs|G25K	cell division cycle 42 (GTP binding protein, 25kDa)	protein-coding	4.7	0.55	10	10	2	4.94	5.11e-05	4.69	7.83e-05	0.97
chr1-116	chr1	227504965	227505105	+	5.8	0.8	5' UTR (NM_014826, exon 1 of 35)	5' UTR (NM_014826, exon 1 of 35)	791	791	NM_014826	8476	Hs.35433	NM_003607	ENSG00000143776	CDC42BPA	CDC42BPA	MRCK|MRCKA|PK428	CDC42 binding protein kinase alpha (DMPK-like)	protein-coding	5.8	0.8	11	11	2	5.53	7.92e-06	5.06	1.77e-05	0.97
chr11-251	chr11	64612716	64612856	+	4.8	0.769	promoter-TSS (NM_017525)	promoter-TSS (NM_017525)	-745	745	NM_017525	55561	Hs.293590	NM_017525	ENSG00000171219	CDC42BPG	CDC42BPG	DMPK2|HSMDPKIN|KAPPA-200|MRCKG|MRCKgamma	CDC42 binding protein kinase gamma (DMPK-like)	protein-coding	4.8	0.769	9	9	1.8	5.09	9.58e-05	5.42	6.03e-05	0.97
chr16-64	chr16	68778089	68778231	+	6.1	0.667	intron (NM_004360, intron 2 of 15)	intron (NM_004360, intron 2 of 15)	6965	6965	NM_004360	999	Hs.461086	NM_004360	ENSG00000039068	CDH1	CDH1	Arc-1|CD324|CDHE|ECAD|LCAM|UVO	cadherin 1, type 1, E-cadherin (epithelial)	protein-coding	6.1	0.667	13	13	2.4	5.38	1.66e-06	5.37	1.68e-06	0.96
chr5-174	chr5	24640022	24640164	+	6.6	0.704	intron (NM_006727, intron 1 of 11)	intron (NM_006727, intron 1 of 11)	4992	4992	NM_006727	1008	Hs.92489	NM_006727	ENSG00000040731	CDH10	CDH10	-	cadherin 10, type 2 (T2-cadherin)	protein-coding	6.6	0.704	15	14	2.4	5.79	2.83e-07	3.56	6.4e-05	0.96
chr16-98	chr16	63878768	63878908	+	5.8	0.75	Intergenic	Charlie5|DNA|hAT-Charlie	1277081	1277081	NM_001797	1009	Hs.116471	NM_001797	ENSG00000140937	CDH11	CDH11	CAD11|CDHOB|OB|OSF-4	cadherin 11, type 2, OB-cadherin (osteoblast)	protein-coding	5.8	0.75	11	11	1.8	6.22	2.63e-06	7.99	2.41e-07	0.97
chr5-51	chr5	22896700	22896840	+	7.9	0.789	Intergenic	Intergenic	-43039	43039	NM_004061	1010	Hs.113684	NM_004061	ENSG00000154162	CDH12	CDH12	CDHB	cadherin 12, type 2 (N-cadherin 2)	protein-coding	7.9	0.789	15	15	3.3	4.52	2.25e-06	4.82	1.04e-06	0.95
chr16-168	chr16	82694171	82694313	+	5.1	0.786	intron (NM_001220488, intron 2 of 14)	intron (NM_001220488, intron 2 of 14)	33843	33843	NM_001220488	1012	Hs.661776	NM_001220488	ENSG00000140945	CDH13	CDH13	CDHH|P105	cadherin 13, H-cadherin (heart)	protein-coding	5.1	0.786	11	11	2	5.44	9.23e-06	9.09	6.76e-08	0.97
chr5-496	chr5	19991242	19991382	+	6.3	0.8	Intergenic	Intergenic	-2959	2959	NM_001167667	1016	Hs.317632	NM_001167667	ENSG00000145526	CDH18	CDH18	CDH14|CDH14L|CDH24	cadherin 18, type 2	protein-coding	6.3	0.8	12	12	2.7	4.52	2.23e-05	4.57	2.03e-05	0.96
chr20-362	chr20	58562728	58562870	+	5.1	0.667	intron (NM_177980, intron 8 of 17)	intron (NM_177980, intron 8 of 17)	-8618	8618	NM_021810	60437	Hs.729046	NM_021810	ENSG00000124215	CDH26	CDH26	VR20	cadherin 26	protein-coding	5.1	0.667	11	11	2	5.44	9.23e-06	4.63	3.95e-05	0.97
chr16-140	chr16	68678871	68679013	+	5.1	0.75	5' UTR (NM_001793, exon 1 of 16)	5' UTR (NM_001793, exon 1 of 16)	791	791	NM_001793	1001	Hs.191842	NM_001793	ENSG00000062038	CDH3	CDH3	CDHP|HJMD|PCAD	cadherin 3, type 1, P-cadherin (placental)	protein-coding	5.1	0.75	11	11	2.4	4.55	4.58e-05	6.76	1.21e-06	0.97
chr20-400	chr20	60013667	60013807	+	5.3	0.857	intron (NM_001794, intron 2 of 15)	intron (NM_001794, intron 2 of 15)	-60740	60740	NM_001252338	1002	Hs.473231	NM_001252338	ENSG00000179242	CDH4	CDH4	CAD4|RCAD	cadherin 4, type 1, R-cadherin (retinal)	protein-coding	5.3	0.857	10	10	1.8	5.66	1.66e-05	11.32	3.31e-08	0.97
chr16-378	chr16	66312389	66312529	+	4.8	0.714	Intergenic	L1PA16|LINE|L1	-88066	88066	NM_001795	1003	Hs.76206	NM_001795	ENSG00000179776	CDH5	CDH5	7B4|CD144	cadherin 5, type 2 (vascular endothelium)	protein-coding	4.8	0.714	9	9	1.8	5.09	9.58e-05	5.37	6.43e-05	0.97
chr5-123	chr5	31288727	31288867	+	6.9	0.682	intron (NM_004932, intron 2 of 11)	intron (NM_004932, intron 2 of 11)	95035	95035	NM_004932	1004	Hs.171054	NM_004932	ENSG00000113361	CDH6	CDH6	CAD6|KCAD	cadherin 6, type 2, K-cadherin (fetal kidney)	protein-coding	6.9	0.682	14	13	3.3	3.92	4.45e-05	5.55	1.18e-06	0.96
chr16-368	chr16	61996236	61996376	+	4.8	0.818	intron (NM_001796, intron 2 of 11)	intron (NM_001796, intron 2 of 11)	74433	74433	NM_001796	1006	Hs.368322	NM_001796	ENSG00000150394	CDH8	CDH8	Nbla04261	cadherin 8, type 2	protein-coding	4.8	0.818	9	9	1.8	5.09	9.58e-05	6.09	2.46e-05	0.97
chr5-1315	chr5	27008979	27009119	+	5.8	0.611	intron (NM_016279, intron 1 of 11)	MLT1I|LTR|ERVL-MaLR	29640	29640	NM_016279	1007	Hs.272212	NM_016279	ENSG00000113100	CDH9	CDH9	-	cadherin 9, type 2 (T1-cadherin)	protein-coding	5.8	0.611	11	11	1.8	6.22	2.63e-06	4.23	8.62e-05	0.97
chr17-33	chr17	37619831	37619971	+	6.3	0.722	intron (NM_016507, intron 1 of 13)	intron (NM_016507, intron 1 of 13)	2162	2162	NM_015083	51755	Hs.416108	NM_015083	ENSG00000167258	CDK12	CDK12	CRK7|CRKR|CRKRS|hCDK12	cyclin-dependent kinase 12	protein-coding	6.3	0.722	12	12	1.8	6.79	3.83e-07	8.37	4.23e-08	0.96
chr11-116	chr11	67276390	67276530	+	4.8	0.75	promoter-TSS (NM_005851)	promoter-TSS (NM_005851)	-358	358	NM_005851	10263	Hs.523835	NM_005851	ENSG00000167797	CDK2AP2	CDK2AP2	DOC-1R|p14	cyclin-dependent kinase 2 associated protein 2	protein-coding	4.8	0.75	10	9	1.8	5.09	9.58e-05	6.15	2.28e-05	0.97
chr17-248	chr17	30954785	30954925	+	4.8	0.786	intron (NM_015194, intron 20 of 21)	intron (NM_015194, intron 20 of 21)	140750	140750	NM_003885	8851	Hs.500015	NM_003885	ENSG00000176749	CDK5R1	CDK5R1	CDK5P35|CDK5R|NCK5A|p23|p25|p35|p35nck5a	cyclin-dependent kinase 5, regulatory subunit 1 (p35)	protein-coding	4.8	0.786	9	9	1.8	5.09	9.58e-05	8.68	1.5e-06	0.97
chr20-93	chr20	31961862	31962002	+	5.8	0.591	exon (NM_016408, exon 9 of 14)	exon (NM_016408, exon 9 of 14)	27405	27405	NM_016082	51654	Hs.435952	NM_016082	ENSG00000101391	CDK5RAP1	CDK5RAP1	C20orf34|C42|CDK5RAP1.3|CDK5RAP1.4|CGI-05|HSPC167	CDK5 regulatory subunit associated protein 1	protein-coding	5.8	0.591	11	11	1.8	6.22	2.63e-06	4.84	2.64e-05	0.97
chr17-146	chr17	46047932	46048072	+	5.3	0.786	promoter-TSS (NM_176096)	promoter-TSS (NM_176096)	-427	427	NM_176096	80279	Hs.20157	NM_176096	ENSG00000108465	CDK5RAP3	CDK5RAP3	C53|HSF-27|IC53|LZAP|MST016|OK/SW-cl.114	CDK5 regulatory subunit associated protein 3	protein-coding	5.3	0.786	10	10	2	5.03	4.45e-05	5.87	1.22e-05	0.97
chr7-153	chr7	92382564	92382706	+	5.1	0.688	intron (NM_001259, intron 3 of 7)	intron (NM_001259, intron 3 of 7)	80596	80596	NM_001259	1021	Hs.119882	NM_001145306	ENSG00000105810	CDK6	CDK6	PLSTIRE	cyclin-dependent kinase 6	protein-coding	5.1	0.688	11	11	2.4	4.55	4.58e-05	5.83	4.85e-06	0.97
chr6-191	chr6	20535200	20535342	+	4.7	0.647	intron (NM_017774, intron 1 of 15)	intron (NM_017774, intron 1 of 15)	583	583	NM_017774	54901	Hs.657604	NM_017774	ENSG00000145996	CDKAL1	CDKAL1	-	CDK5 regulatory subunit associated protein 1-like 1	protein-coding	4.7	0.647	10	10	2	4.94	5.11e-05	6.09	8.92e-06	0.97
chr14-109	chr14	50831934	50832076	+	6.1	0.577	intron (NM_004196, intron 1 of 8)	intron (NM_004196, intron 1 of 8)	30612	30612	NM_004196	8814	Hs.679430	NM_004196	ENSG00000100490	CDKL1	CDKL1	KKIALRE|P42	cyclin-dependent kinase-like 1 (CDC2-related kinase)	protein-coding	6.1	0.577	13	13	3.2	4.03	3.35e-05	5.68	9.25e-07	0.96
chr4-438	chr4	184384027	184384167	+	4.8	0.692	Intergenic	Tigger3b|DNA|TcMar-Tigger	18308	18308	NM_017632	55602	Hs.644077	NM_017632	ENSG00000168564	CDKN2AIP	CDKN2AIP	CARF	CDKN2A interacting protein	protein-coding	4.8	0.692	9	9	1.8	5.09	9.58e-05	7.29	6.11e-06	0.97
chr5-3387	chr5	133801325	133801465	+	5.3	0.769	Intergenic	MIRb|SINE|MIR	-53797	53797	NM_080656	91368	Hs.156506	NM_080656	ENSG00000237190	CDKN2AIPNL	CDKN2AIPNL	-	CDKN2A interacting protein N-terminal like	protein-coding	5.3	0.769	10	10	2	5.03	4.45e-05	8.49	4.9e-07	0.97
chr9-30	chr9	22009794	22009936	+	5.6	0.542	promoter-TSS (NM_078487)	promoter-TSS (NM_078487)	-553	553	NM_078487	1030	Hs.72901	NM_004936	ENSG00000147883	CDKN2B	CDKN2B	CDK4I|INK4B|MTS2|P15|TP15|p15INK4b	cyclin-dependent kinase inhibitor 2B (p15, inhibits CDK4)	protein-coding	5.6	0.542	13	12	2	5.93	1.53e-06	5.44	3.63e-06	0.96
chr14-237	chr14	54879125	54879265	+	5.8	0.75	intron (NM_005192, intron 5 of 7)	intron (NM_005192, intron 5 of 7)	15522	15522	NM_005192	1033	Hs.84113	NM_001130851	ENSG00000100526	CDKN3	CDKN3	CDI1|CIP2|KAP|KAP1	cyclin-dependent kinase inhibitor 3	protein-coding	5.8	0.75	11	11	1.8	6.22	2.63e-06	5.16	1.48e-05	0.97
chr5-6694	chr5	115141387	115141529	+	4.7	0.769	intron (NM_001801, intron 4 of 4)	intron (NM_001801, intron 4 of 4)	10947	10947	NM_001801	1036	Hs.442378	NM_001801	ENSG00000129596	CDO1	CDO1	-	cysteine dioxygenase, type I	protein-coding	4.7	0.769	10	10	2	4.94	5.11e-05	7.98	8.47e-07	0.97
chr17-180	chr17	15390578	15390718	+	4.8	0.818	intron (NR_037924, intron 4 of 5)	MER44C|DNA|TcMar-Tigger	-19723	19723	NM_001204477	284040	Hs.731765	NM_173622	ENSG00000239704	CDRT4	CDRT4	-	CMT1A duplicated region transcript 4	protein-coding	4.8	0.818	9	9	1.8	5.09	9.58e-05	8.93	1.2e-06	0.97
chr17-179	chr17	14944111	14944251	+	4.8	0.714	Intergenic	Intergenic	9889	9889	NR_033371	94150	Hs.147654	NR_033371		CDRT7	CDRT7	LINC00025|NCRNA00025	CMT1A duplicated region transcript 7 (non-protein coding)	miscRNA	4.8	0.714	9	9	1.8	5.09	9.58e-05	5.46	5.65e-05	0.97
chr4-109	chr4	85569035	85569175	+	4.8	0.909	intron (NM_001263, intron 12 of 12)	intron (NM_001263, intron 12 of 12)	65048	65048	NM_001263	1040	Hs.708641	NM_001263	ENSG00000163624	CDS1	CDS1	CDS	CDP-diacylglycerol synthase (phosphatidate cytidylyltransferase) 1	protein-coding	4.8	0.909	10	9	1.8	5.09	9.58e-05	7.37	5.58e-06	0.97
chr5-3413	chr5	149543635	149543775	+	4.8	0.733	Intergenic	L2b|LINE|L2	-2639	2639	NM_001804	1044	Hs.1545	NM_001804	ENSG00000113722	CDX1	CDX1	-	caudal type homeobox 1	protein-coding	4.8	0.733	10	9	1.8	5.09	9.58e-05	6.74	1.12e-05	0.97
chr16-483	chr16	80900981	80901121	+	4.8	0.714	Intergenic	L1PA16|LINE|L1	-62876	62876	NM_152342	124359	Hs.373908	NM_152342	ENSG00000166446	CDYL2	CDYL2	PCCP1	chromodomain protein, Y-like 2	protein-coding	4.8	0.714	9	9	1.8	5.09	9.58e-05	5.42	6.03e-05	0.97
chr8-600	chr8	48649597	48649737	+	4.8	0.818	3' UTR (NM_005195, exon 1 of 1)	3' UTR (NM_005195, exon 1 of 1)	1059	1059	NM_005195	1052	Hs.440829	NM_005195	ENSG00000221869	CEBPD	CEBPD	C/EBP-delta|CELF|CRP3|NF-IL6-beta	CCAAT/enhancer binding protein (C/EBP), delta	protein-coding	4.8	0.818	9	9	1.8	5.09	9.58e-05	9.6	6.02e-07	0.97
chr9-183	chr9	135955777	135955917	+	4.8	0.833	Intergenic	LTR29|LTR|ERV1	-2079	2079	NR_001275	1057	Hs.654361	NR_001275		CELP	CELP	CELL|cell1|cell2|cell3	carboxyl ester lipase pseudogene	pseudo	4.8	0.833	10	9	1.8	5.09	9.58e-05	10.18	3.74e-07	0.97
chr4-244	chr4	67733482	67733622	+	4.8	0.818	Intergenic	Intergenic	677704	677704	NM_001812	1060	Hs.479867	NM_001812	ENSG00000145241	CENPC1	CENPC1	CENP-C|CENPC|MIF2|hcp-4	centromere protein C 1	protein-coding	4.8	0.818	9	9	1.8	5.09	9.58e-05	8.68	1.5e-06	0.97
chr1-56	chr1	214776078	214776220	+	6.1	0.882	promoter-TSS (NM_016343)	promoter-TSS (NM_016343)	-383	383	NM_016343	1063	Hs.497741	NM_016343	ENSG00000117724	CENPF	CENPF	CENF|PRO1779|hcp-1	centromere protein F, 350/400kDa (mitosin)	protein-coding	6.1	0.882	13	13	3.2	4.03	3.35e-05	8.13	1.63e-08	0.96
chrX-59	chrX	100390064	100390204	+	5.3	0.909	intron (NM_006733, intron 14 of 20)	L2|LINE|L2	35336	35336	NM_006733	2491	Hs.737663	NM_006733	ENSG00000102384	CENPI	CENPI	CENP-I|FSHPRH1|LRPR1|Mis6	centromere protein I	protein-coding	5.3	0.909	10	10	1.8	5.66	1.66e-05	8.29	6.06e-07	0.97
chr1-469	chr1	173791453	173791595	+	4.7	0.667	intron (NM_001171182, intron 1 of 4)	intron (NM_001171182, intron 1 of 4)	1746	1746	NM_001171182	91687	Hs.720473	NM_001127181	ENSG00000120334	CENPL	CENPL	C1orf155|CENP-L|RP3-383J4.1|dJ383J4.3	centromere protein L	protein-coding	4.7	0.667	10	10	2	4.94	5.11e-05	7.16	2.21e-06	0.97
chr6-133	chr6	126939327	126939467	+	5.3	0.833	Intergenic	Intergenic	278144	278144	NM_001012507	387103	Hs.486401	NM_001012507	ENSG00000203760	CENPW	CENPW	C6orf173|CUG2	centromere protein W	protein-coding	5.3	0.833	10	10	1.8	5.66	1.66e-05	10.67	5.64e-08	0.97
chr5-6956	chr5	122759611	122759751	+	4.8	0.75	promoter-TSS (NM_001166226)	promoter-TSS (NM_001166226)	-395	395	NM_153223	153241	Hs.483209	NM_001166226	ENSG00000168944	CEP120	CEP120	CCDC100	centrosomal protein 120kDa	protein-coding	4.8	0.75	9	9	1.8	5.09	9.58e-05	5.87	3.28e-05	0.97
chr4-99	chr4	56814557	56814697	+	4.8	0.75	promoter-TSS (NM_025009)	promoter-TSS (NM_025009)	-347	347	NM_025009	9662	Hs.518767	NM_025009	ENSG00000174799	CEP135	CEP135	CEP4|KIAA0635|MCPH8	centrosomal protein 135kDa	protein-coding	4.8	0.75	10	9	1.8	5.09	9.58e-05	7.37	5.58e-06	0.97
chr1-208	chr1	179923358	179923500	+	4.7	0.706	promoter-TSS (NM_014810)	promoter-TSS (NM_014810)	-479	479	NM_014810	9857	Hs.413045	NM_014810	ENSG00000135837	CEP350	CEP350	CAP350|GM133	centrosomal protein 350kDa	protein-coding	4.7	0.706	11	10	2	4.94	5.11e-05	7.01	2.64e-06	0.97
chr5-1826	chr5	637317	637459	+	4.7	0.75	intron (NM_018140, intron 6 of 11)	intron (NM_018140, intron 6 of 11)	24983	24983	NM_018140	55722	Hs.591741	NM_018140	ENSG00000112877	CEP72	CEP72	-	centrosomal protein 72kDa	protein-coding	4.7	0.75	11	10	2	4.94	5.11e-05	4.72	7.41e-05	0.97
chr5-900	chr5	89704872	89705014	+	5.1	0.867	intron (NM_004365, intron 1 of 4)	intron (NM_004365, intron 1 of 4)	660	660	NM_004365	1070	Hs.591767	NM_004365	ENSG00000153140	CETN3	CETN3	CEN3	centrin, EF-hand protein, 3	protein-coding	5.1	0.867	13	11	2	5.44	9.23e-06	6.94	9.34e-07	0.97
chr16-208	chr16	75467990	75468130	+	4.8	0.7	promoter-TSS (NM_006324)	promoter-TSS (NM_006324)	-673	673	NM_006324	10428	Hs.461361	NM_006324	ENSG00000153774	CFDP1	CFDP1	BCNT|BUCENTAUR|CENP-29|CP27|SWC5|Yeti|p97	craniofacial development protein 1	protein-coding	4.8	0.7	10	9	1.8	5.09	9.58e-05	6.09	2.46e-05	0.97
chr2-409	chr2	202014475	202014617	+	4.7	0.833	exon (NM_003879, exon 8 of 10)	exon (NM_003879, exon 8 of 10)	7969	7969	NR_040030	65072	Hs.664613	NR_040030		CFLAR-AS1	CFLAR-AS1	ALS2CR10	CFLAR antisense RNA 1	miscRNA	4.7	0.833	10	10	2	4.94	5.11e-05	6.81	3.42e-06	0.97
chr14-569	chr14	54976727	54976869	+	5.1	0.8	intron (NM_006568, intron 1 of 5)	CpG	211	211	NM_006568	10668	Hs.59106	NM_006568	ENSG00000100532	CGRRF1	CGRRF1	CGR19|RNF197	cell growth regulator with ring finger domain 1	protein-coding	5.1	0.8	11	11	2	5.44	9.23e-06	4.44	5.7e-05	0.97
chr2-86	chr2	53703438	53703580	+	5.6	0.929	Intergenic	Intergenic	-291420	291420	NM_001008708	494143	Hs.585944	NM_001008708	ENSG00000143942	CHAC2	CHAC2	-	ChaC, cation transport regulator homolog 2 (E. coli)	protein-coding	5.6	0.929	12	12	2	5.93	1.53e-06	8.01	6.73e-08	0.96
chr7-160	chr7	132679059	132679201	+	5.1	0.846	intron (NM_017812, intron 3 of 7)	L4|LINE|RTE	87698	87698	NM_017812	54927	Hs.655010	NM_017812	ENSG00000106554	CHCHD3	CHCHD3	MINOS3|PPP1R22	coiled-coil-helix-coiled-coil-helix domain containing 3	protein-coding	5.1	0.846	11	11	2	5.44	9.23e-06	8.78	9.56e-08	0.97
chr2-157	chr2	113335885	113336027	+	5.1	0.733	Intergenic	L1MD2|LINE|L1	-6080	6080	NM_032309	84269	Hs.375707	NM_032309	ENSG00000125611	CHCHD5	CHCHD5	C2orf9	coiled-coil-helix-coiled-coil-helix domain containing 5	protein-coding	5.1	0.733	11	11	2	5.44	9.23e-06	6.21	2.69e-06	0.97
chr1-209	chr1	146713679	146713819	+	5.3	0.786	promoter-TSS (NM_004284)	promoter-TSS (NM_004284)	-542	542	NM_001256338	9557	Hs.191164	NM_001256336	ENSG00000131778	CHD1L	CHD1L	ALC1|CHDL	chromodomain helicase DNA binding protein 1-like	protein-coding	5.3	0.786	10	10	1.8	5.66	1.66e-05	9.65	1.54e-07	0.97
chr20-286	chr20	40959449	40959589	+	5.3	0.714	intron (NM_133170, intron 11 of 31)	MER5A1|DNA|hAT-Charlie	-712386	712386	NM_032221	84181	Hs.741381	NM_032221	ENSG00000124177	CHD6	CHD6	CHD5|RIGB	chromodomain helicase DNA binding protein 6	protein-coding	5.3	0.714	10	10	2	5.03	4.45e-05	7.26	1.95e-06	0.97
chr14-13	chr14	21903879	21904019	+	7.4	0.8	intron (NM_020920, intron 1 of 37)	intron (NM_020920, intron 1 of 37)	1508	1508	NM_020920	57680	Hs.530698	NM_001170629	ENSG00000100888	CHD8	CHD8	HELSNF1	chromodomain helicase DNA binding protein 8	protein-coding	7.4	0.8	14	14	1.8	7.92	6.44e-09	10.6	1.64e-10	0.95
chr16-143	chr16	53075431	53075571	+	5.3	0.846	Intergenic	Intergenic	-13444	13444	NM_025134	80205	Hs.622347	NM_025134	ENSG00000177200	CHD9	CHD9	AD013|CReMM|KISH2|PRIC320	chromodomain helicase DNA binding protein 9	protein-coding	5.3	0.846	10	10	2	5.03	4.45e-05	7.26	1.95e-06	0.97
chrX-160	chrX	85166535	85166675	+	4.8	0.692	intron (NM_000390, intron 8 of 14)	intron (NM_000390, intron 8 of 14)	135961	135961	NM_000390	1121	Hs.496449	NM_000390	ENSG00000188419	CHM	CHM	DXS540|GGTA|HSD-32|REP-1|TCD	choroideremia (Rab escort protein 1)	protein-coding	4.8	0.692	9	9	1.8	5.09	9.58e-05	8.23	2.31e-06	0.97
chr20-25	chr20	32382221	32382361	+	6.9	0.812	Intergenic	MIR|SINE|MIR	-16819	16819	NM_176812	128866	Hs.472471	NM_176812	ENSG00000101421	CHMP4B	CHMP4B	C20orf178|CHMP4A|CTPP3|SNF7|SNF7-2|Shax1|VPS32B|Vps32-2|dJ553F4.4	charged multivesicular body protein 4B	protein-coding	6.9	0.812	13	13	3.3	3.92	4.45e-05	5.65	9.7e-07	0.96
chr17-441	chr17	78840548	78840690	+	4.7	0.812	intron (NM_001163034, intron 13 of 29)	FLAM_C|SINE|Alu	-125022	125022	NM_024591	79643	Hs.514560	NM_024591	ENSG00000176108	CHMP6	CHMP6	VPS20	charged multivesicular body protein 6	protein-coding	4.7	0.812	10	10	2	4.94	5.11e-05	9.26	2.24e-07	0.97
chr11-317	chr11	90069354	90069496	+	4.7	0.846	Intergenic	MIR|SINE|MIR	-112893	112893	NM_001144073	26973	Hs.22857	NM_001144073	ENSG00000110172	CHORDC1	CHORDC1	CHP1	cysteine and histidine-rich domain (CHORD) containing 1	protein-coding	4.7	0.846	10	10	2	4.94	5.11e-05	7.39	1.68e-06	0.97
chr1-342	chr1	239770659	239770799	+	4.8	0.714	Intergenic	Intergenic	-21644	21644	NM_000740	1131	Hs.7138	NM_000740	ENSG00000133019	CHRM3	CHRM3	EGBRS|HM3	cholinergic receptor, muscarinic 3	protein-coding	4.8	0.714	10	9	1.8	5.09	9.58e-05	6.74	1.12e-05	0.97
chr20-367	chr20	62040621	62040763	+	4.7	0.667	intron (NM_172106, intron 14 of 15)	intron (NM_172106, intron 14 of 15)	-47944	47944	NM_001256573	1137	Hs.10734	NM_000744	ENSG00000101204	CHRNA4	CHRNA4	BFNC|EBN|EBN1|NACHR|NACHRA4|NACRA4	cholinergic receptor, nicotinic, alpha 4 (neuronal)	protein-coding	4.7	0.667	11	10	2	4.94	5.11e-05	9.89	1.24e-07	0.97
chr15-138	chr15	78873387	78873527	+	4.8	0.818	intron (NM_000745, intron 2 of 5)	intron (NM_000745, intron 2 of 5)	15595	15595	NM_000745	1138	Hs.719767	NM_000745	ENSG00000169684	CHRNA5	CHRNA5	LNCR2	cholinergic receptor, nicotinic, alpha 5 (neuronal)	protein-coding	4.8	0.818	9	9	1.8	5.09	9.58e-05	10.18	3.74e-07	0.97
chr4-209	chr4	40339129	40339269	+	4.8	0.818	intron (NM_017581, intron 2 of 4)	intron (NM_017581, intron 2 of 4)	1853	1853	NM_017581	55584	Hs.272278	NM_017581	ENSG00000174343	CHRNA9	CHRNA9	HSA243342|NACHRA9	cholinergic receptor, nicotinic, alpha 9 (neuronal)	protein-coding	4.8	0.818	9	9	1.8	5.09	9.58e-05	9.32	7.65e-07	0.97
chr18-77	chr18	24648340	24648482	+	4.7	0.769	intron (NM_031422, intron 2 of 5)	intron (NM_031422, intron 2 of 5)	116891	116891	NM_001256316	83539	Hs.706552	NM_001256316	ENSG00000154080	CHST9	CHST9	GALNAC4ST-2	carbohydrate (N-acetylgalactosamine 4-0) sulfotransferase 9	protein-coding	4.7	0.769	10	10	2	4.94	5.11e-05	6.94	2.88e-06	0.97
chr15-145	chr15	101667525	101667665	+	4.8	0.75	Intergenic	Intergenic	124542	124542	NM_014918	22856	Hs.110488	NM_014918	ENSG00000131873	CHSY1	CHSY1	CHSY|CSS1|ChSy-1|TPBS	chondroitin sulfate synthase 1	protein-coding	4.8	0.75	9	9	1.8	5.09	9.58e-05	10.18	3.74e-07	0.97
chr16-78	chr16	57481862	57482004	+	5.1	0.706	promoter-TSS (NM_020313)	promoter-TSS (NM_020313)	-564	564	NM_020313	57019	Hs.4900	NM_020313	ENSG00000005194	CIAPIN1	CIAPIN1	2810413N20Rik|Anamorsin|DRE2|PRO0915	cytokine induced apoptosis inhibitor 1	protein-coding	5.1	0.706	12	11	2	5.44	9.23e-06	6.11	3.13e-06	0.97
chr1-160	chr1	41352725	41352867	+	5.1	0.647	Intergenic	Intergenic	-24778	24778	NM_133467	163732	Hs.355820	NM_133467	ENSG00000179862	CITED4	CITED4	-	Cbp/p300-interacting transactivator, with Glu/Asp-rich carboxy-terminal domain, 4	protein-coding	5.1	0.647	11	11	2.4	4.55	4.58e-05	10.32	1.91e-08	0.97
chr13-76	chr13	53030348	53030490	+	4.7	0.857	intron (NM_018204, intron 1 of 8)	intron (NM_018204, intron 1 of 8)	924	924	NM_018204	26586	Hs.625768	NM_001098525	ENSG00000136108	CKAP2	CKAP2	LB1|TMAP|se20-10	cytoskeleton associated protein 2	protein-coding	4.7	0.857	10	10	2	4.94	5.11e-05	7.31	1.84e-06	0.97
chr2-100	chr2	113484213	113484355	+	5.6	0.706	Intergenic	Intergenic	37970	37970	NM_152515	150468	Hs.434250	NM_152515	ENSG00000169607	CKAP2L	CKAP2L	-	cytoskeleton associated protein 2-like	protein-coding	5.6	0.706	12	12	2	5.93	1.53e-06	7.24	1.95e-07	0.96
chr12-56	chr12	106620512	106620652	+	4.8	0.833	Intergenic	Intergenic	21131	21131	NM_006825	10970	Hs.74368	NM_006825	ENSG00000136026	CKAP4	CKAP4	CLIMP-63|ERGIC-63|p63	cytoskeleton-associated protein 4	protein-coding	4.8	0.833	10	9	1.8	5.09	9.58e-05	7.64	4.21e-06	0.97
chr14-1409	chr14	103978771	103978913	+	4.7	0.714	Intergenic	Intergenic	10354	10354	NM_001823	1152	Hs.173724	NM_001823	ENSG00000166165	CKB	CKB	B-CK|CKBB	creatine kinase, brain	protein-coding	4.7	0.714	10	10	2	4.94	5.11e-05	7.8	1.04e-06	0.97
chr1-175	chr1	109506858	109506998	+	4.8	0.769	promoter-TSS (NM_015127)	promoter-TSS (NM_015127)	-817	817	NM_015127	23155	Hs.658489	NM_001048210	ENSG00000121940	CLCC1	CLCC1	MCLC	chloride channel CLIC-like 1	protein-coding	4.8	0.769	10	9	1.8	5.09	9.58e-05	8.23	2.31e-06	0.97
chr3-300	chr3	190075142	190075284	+	4.7	0.857	Intergenic	Intergenic	-30448	30448	NM_006580	10686	Hs.251391	NM_006580	ENSG00000113946	CLDN16	CLDN16	HOMG3|PCLN1	claudin 16	protein-coding	4.7	0.857	10	10	2	4.94	5.11e-05	5.34	2.7e-05	0.97
chrX-64	chrX	106189302	106189442	+	5.3	0.667	intron (NM_024657, intron 14 of 16)	L1MB8|LINE|L1	25766	25766	NM_020384	9075	Hs.522746	NM_001171092	ENSG00000165376	CLDN2	CLDN2	-	claudin 2	protein-coding	5.3	0.667	10	10	1.8	5.66	1.66e-05	6.02	9.84e-06	0.97
chr4-436	chr4	184239279	184239419	+	4.8	0.714	3' UTR (NM_001111319, exon 1 of 1)	3' UTR (NM_001111319, exon 1 of 1)	2578	2578	NM_001111319	53842	Hs.712634	NM_001111319	ENSG00000177300	CLDN22	CLDN22	CLDN21	claudin 22	protein-coding	4.8	0.714	9	9	1.8	5.09	9.58e-05	6.4	1.68e-05	0.97
chr8-95	chr8	8527050	8527190	+	5.3	0.75	Intergenic	MIRb|SINE|MIR	-32546	32546	NM_194284	137075	Hs.183617	NM_194284	ENSG00000253958	CLDN23	CLDN23	CLDNL|hCG1646163	claudin 23	protein-coding	5.3	0.75	11	10	1.8	5.66	1.66e-05	7.34	1.78e-06	0.97
chr14-739	chr14	38905771	38905911	+	4.8	0.818	Intergenic	Intergenic	-180266	180266	NM_175060	161198	Hs.525307	NM_175060	ENSG00000176435	CLEC14A	CLEC14A	C14orf27|CEG1|EGFR-5	C-type lectin domain family 14, member A	protein-coding	4.8	0.818	9	9	1.8	5.09	9.58e-05	6.6	1.32e-05	0.97
chr16-162	chr16	74527044	74527186	+	4.7	0.667	intron (NR_027264, intron 6 of 26)	intron (NR_027264, intron 6 of 26)	-71747	71747	NM_001011880	497190	Hs.592064	NM_001011880	ENSG00000140839	CLEC18B	CLEC18B	MRCL2	C-type lectin domain family 18, member B	protein-coding	4.7	0.667	11	10	2	4.94	5.11e-05	7.01	2.64e-06	0.97
chr6-210	chr6	45668587	45668729	+	4.7	0.769	Intergenic	L1ME4a|LINE|L1	236676	236676	NR_045674	53405	Hs.734348	NM_001114086	ENSG00000112782	CLIC5	CLIC5	MST130|MSTP130	chloride intracellular channel 5	protein-coding	4.7	0.769	10	10	2	4.94	5.11e-05	5.42	2.37e-05	0.97
chr5-6796	chr5	157346144	157346286	+	4.7	0.667	Intergenic	MER50|LTR|ERV1	-60032	60032	NM_001195555	9685	Hs.644000	NM_001195555	ENSG00000113282	CLINT1	CLINT1	CLINT|ENTH|EPN4|EPNR	clathrin interactor 1	protein-coding	4.7	0.667	10	10	2	4.94	5.11e-05	9.26	2.24e-07	0.97
chr2-115	chr2	29344600	29344740	+	5.3	0.667	intron (NM_024692, intron 2 of 15)	intron (NM_024692, intron 2 of 15)	6362	6362	NM_024692	79745	Hs.122927	NM_024692	ENSG00000115295	CLIP4	CLIP4	RSNL2	CAP-GLY domain containing linker protein family, member 4	protein-coding	5.3	0.667	10	10	1.8	5.66	1.66e-05	5.46	2.24e-05	0.97
chr5-3466	chr5	178063355	178063495	+	4.8	0.714	Intergenic	Intergenic	-9371	9371	NM_020666	57396	Hs.406557	NM_020666	ENSG00000113240	CLK4	CLK4	-	CDC-like kinase 4	protein-coding	4.8	0.714	10	9	1.8	5.09	9.58e-05	6.89	9.49e-06	0.97
chr11-158	chr11	123058370	123058510	+	5.3	0.909	intron (NM_024769, intron 1 of 6)	intron (NM_024769, intron 1 of 6)	7567	7567	NM_024769	79827	Hs.591949	NM_024769	ENSG00000166250	CLMP	CLMP	ACAM|ASAM	CXADR-like membrane protein	protein-coding	5.3	0.909	10	10	1.8	5.66	1.66e-05	9.78	1.36e-07	0.97
chr4-176	chr4	10658215	10658355	+	4.8	0.643	intron (NM_052964, intron 2 of 18)	L1ME3E|LINE|L1	28101	28101	NM_052964	116449	Hs.678910	NM_052964	ENSG00000109684	CLNK	CLNK	MIST	cytokine-dependent hematopoietic cell linker	protein-coding	4.8	0.643	9	9	1.8	5.09	9.58e-05	7.64	4.21e-06	0.97
chr11-125	chr11	72153045	72153185	+	4.8	0.786	Intergenic	MLT1E1A|LTR|ERVL-MaLR	-7391	7391	NM_001258392	81570	Hs.523877	NM_001258392	ENSG00000162129	CLPB	CLPB	HSP78|SKD3	ClpB caseinolytic peptidase B homolog (E. coli)	protein-coding	4.8	0.786	10	9	1.8	5.09	9.58e-05	6.6	1.32e-05	0.97
chr9-56	chr9	36191878	36192018	+	5.8	0.765	intron (NM_001184762, intron 1 of 2)	intron (NM_001184762, intron 1 of 2)	1095	1095	NM_007096	1211	Hs.522114	NM_001076677	ENSG00000122705	CLTA	CLTA	LCA	clathrin, light chain A	protein-coding	5.8	0.765	11	11	2	5.53	7.92e-06	5.7	6.01e-06	0.97
chr8-239	chr8	27472515	27472657	+	4.7	0.786	promoter-TSS (NM_001831)	promoter-TSS (NM_001831)	-258	258	NM_001831	1191	Hs.436657	NM_001831	ENSG00000120885	CLU	CLU	APO-J|APOJ|CLI|KUB1|NA1/NA2|SGP-2|SGP2|SP-40|TRPM-2|TRPM2	clusterin	protein-coding	4.7	0.786	11	10	2	4.94	5.11e-05	6.14	8.27e-06	0.97
chr5-111	chr5	10310417	10310559	+	6.6	0.708	Intergenic	Intergenic	-2320	2320	NM_138809	134147	Hs.192586	NM_138809	ENSG00000164237	CMBL	CMBL	JS-1	carboxymethylenebutenolidase homolog (Pseudomonas)	protein-coding	6.6	0.708	15	14	3.2	4.34	7.56e-06	3.92	2.32e-05	0.96
chr16-222	chr16	81533566	81533706	+	5.3	0.733	intron (NM_030629, intron 1 of 20)	intron (NM_030629, intron 1 of 20)	4682	4682	NM_030629	80790	Hs.594095	NM_030629	ENSG00000153815	CMIP	CMIP	TCMIP	c-Maf inducing protein	protein-coding	5.3	0.733	10	10	2	5.03	4.45e-05	5.59	1.84e-05	0.97
chr16-83	chr16	66748360	66748502	+	5.1	0.824	Intergenic	Intergenic	-17821	17821	NM_178818	146223	Hs.643961	NM_178818	ENSG00000183723	CMTM4	CMTM4	CKLFSF4	CKLF-like MARVEL transmembrane domain containing 4	protein-coding	5.1	0.824	12	11	2	5.44	9.23e-06	8.04	2.26e-07	0.97
chr16-79	chr16	57926168	57926310	+	5.6	0.778	intron (NM_001297, intron 31 of 32)	intron (NM_001297, intron 31 of 32)	78781	78781	NM_001135639	1258	Hs.147062	NM_001135639	ENSG00000070729	CNGB1	CNGB1	CNCG2|CNCG3L|CNCG4|CNG4|CNGB1B|GAR1|GARP|RCNC2|RCNCb|RCNCbeta|RP45	cyclic nucleotide gated channel beta 1	protein-coding	5.6	0.778	12	12	2	5.93	1.53e-06	6.22	9.5e-07	0.96
chr14-513	chr14	54924449	54924589	+	4.8	0.625	Intergenic	Intergenic	-16371	16371	NM_005776	10175	Hs.741202	NM_001009551	ENSG00000100528	CNIH	CNIH	CNIH1|CNIL|TGAM77	cornichon homolog (Drosophila)	protein-coding	4.8	0.625	10	9	1.8	5.09	9.58e-05	5.15	8.77e-05	0.97
chr1-643	chr1	224730794	224730936	+	4.7	0.632	Intergenic	MER21C|LTR|ERVL	-73314	73314	NM_152495	149111	Hs.731723	NM_152495	ENSG00000143786	CNIH3	CNIH3	CNIH-3	cornichon homolog 3 (Drosophila)	protein-coding	4.7	0.632	10	10	2	4.94	5.11e-05	5.03	4.42e-05	0.97
chr7-161	chr7	135138033	135138175	+	5.1	0.667	intron (NM_001190847, intron 1 of 10)	intron (NM_001190847, intron 1 of 10)	56771	56771	NM_001190850	4850	Hs.490224	NM_001008225	ENSG00000080802	CNOT4	CNOT4	CLONE243|NOT4|NOT4H	CCR4-NOT transcription complex, subunit 4	protein-coding	5.1	0.667	11	11	2	5.44	9.23e-06	9.55	4.16e-08	0.97
chr5-6868	chr5	179923308	179923450	+	4.7	0.786	intron (NM_015455, intron 1 of 11)	intron (NM_015455, intron 1 of 11)	1962	1962	NM_015455	57472	Hs.608380	NM_015455	ENSG00000113300	CNOT6	CNOT6	CCR4	CCR4-NOT transcription complex, subunit 6	protein-coding	4.7	0.786	10	10	2	4.94	5.11e-05	5.3	2.88e-05	0.97
chr1-748	chr1	246742126	246742268	+	4.7	0.917	intron (NM_001139459, intron 1 of 8)	MIR|SINE|MIR	12558	12558	NM_152609	163882	Hs.368353	NM_001139459	ENSG00000162852	CNST	CNST	C1orf71|PPP1R64	consortin, connexin sorting protein	protein-coding	4.7	0.917	10	10	2	4.94	5.11e-05	5.93	1.11e-05	0.97
chr11-24	chr11	58426626	58426768	+	5.6	0.667	Intergenic	Intergenic	36551	36551	NM_000614	1270	Hs.524920	NM_000614	ENSG00000242689	CNTF	CNTF	HCNTF	ciliary neurotrophic factor	protein-coding	5.6	0.667	13	12	2.4	4.96	9.07e-06	4.82	1.22e-05	0.96
chr9-32	chr9	17131483	17131623	+	5.3	0.75	Intergenic	Intergenic	-3485	3485	NM_017738	54875	Hs.435381	NM_001114395	ENSG00000044459	CNTLN	CNTLN	C9orf101|C9orf39|RP11-340N12.1|bA340N12.1	centlein, centrosomal protein	protein-coding	5.3	0.75	12	10	1.8	5.66	1.66e-05	5.77	1.4e-05	0.97
chr7-431	chr7	145496608	145496748	+	4.8	0.733	Intergenic	L1MEe|LINE|L1	-316775	316775	NM_014141	26047	Hs.655684	NM_014141	ENSG00000174469	CNTNAP2	CNTNAP2	AUTS15|CASPR2|CDFE|NRXN4|PTHSL1	contactin associated protein-like 2	protein-coding	4.8	0.733	9	9	1.8	5.09	9.58e-05	9.06	9.65e-07	0.97
chr16-468	chr16	76225767	76225907	+	4.8	0.692	Intergenic	Intergenic	-85339	85339	NM_033401	85445	Hs.461389	NM_033401	ENSG00000152910	CNTNAP4	CNTNAP4	CASPR4	contactin associated protein-like 4	protein-coding	4.8	0.692	9	9	1.8	5.09	9.58e-05	6.34	1.82e-05	0.97
chr9-156	chr9	123900553	123900693	+	5.3	0.786	intron (NM_007018, intron 13 of 41)	intron (NM_007018, intron 13 of 41)	50049	50049	NM_007018	11064	Hs.653263	NM_007018	ENSG00000119397	CNTRL	CNTRL	CEP1|CEP110|FAN|bA165P4.1	centriolin	protein-coding	5.3	0.786	10	10	1.8	5.66	1.66e-05	6.12	8.5e-06	0.97
chr7-193	chr7	51498463	51498605	+	4.7	0.75	Intergenic	Tigger5|DNA|TcMar-Tigger	-114019	114019	NM_015198	23242	Hs.99141	NM_015198	ENSG00000106078	COBL	COBL	-	cordon-bleu homolog (mouse)	protein-coding	4.7	0.75	10	10	2	4.94	5.11e-05	8.9	3.2e-07	0.97
chr6-71	chr6	75913660	75913802	+	5.1	0.667	intron (NM_004370, intron 1 of 65)	intron (NM_004370, intron 1 of 65)	1892	1892	NM_080645	1303	Hs.101302	NM_004370	ENSG00000111799	COL12A1	COL12A1	BA209D8.1|COL12A1L|DJ234P15.1	collagen, type XII, alpha 1	protein-coding	5.1	0.667	12	11	2	5.44	9.23e-06	8.21	1.84e-07	0.97
chr8-72	chr8	121162880	121163020	+	5.3	0.923	intron (NM_021110, intron 2 of 47)	L2c|LINE|L2	25598	25598	NM_021110	7373	Hs.409662	NM_021110	ENSG00000187955	COL14A1	COL14A1	UND	collagen, type XIV, alpha 1	protein-coding	5.3	0.923	12	10	2	5.03	4.45e-05	5.1	3.93e-05	0.97
chr17-195	chr17	48296603	48296745	+	4.7	0.786	Intergenic	Charlie25|DNA|hAT-Charlie	-17674	17674	NM_000088	1277	Hs.681002	NM_000088	ENSG00000108821	COL1A1	COL1A1	OI4	collagen, type I, alpha 1	protein-coding	4.7	0.786	11	10	2	4.94	5.11e-05	5.18	3.47e-05	0.97
chr6-112	chr6	56285707	56285847	+	5.3	0.917	intron (NR_046940, intron 2 of 5)	MIR|SINE|MIR	-173399	173399	NM_030820	81578	Hs.47629	NM_030820	ENSG00000124749	COL21A1	COL21A1	COLA1L|dJ682J15.1|dJ708F5.1	collagen, type XXI, alpha 1	protein-coding	5.3	0.917	10	10	1.8	5.66	1.66e-05	8.49	4.9e-07	0.97
chr13-163	chr13	110716253	110716393	+	4.8	0.818	Intergenic	Intergenic	243173	243173	NM_001845	1282	Hs.17441	NM_001845	ENSG00000187498	COL4A1	COL4A1	HANAC|POREN1|arresten	collagen, type IV, alpha 1	protein-coding	4.8	0.818	9	9	1.8	5.09	9.58e-05	10.18	3.74e-07	0.97
chrX-11	chrX	107685296	107685436	+	6.9	0.609	intron (NM_033380, intron 1 of 50)	intron (NM_033380, intron 1 of 50)	2292	2292	NM_033380	1287	Hs.369089	NM_000495	ENSG00000188153	COL4A5	COL4A5	ASLN|ATS|CA54	collagen, type IV, alpha 5	protein-coding	6.9	0.609	13	13	1.8	7.36	5.15e-08	4.36	1.52e-05	0.96
chrX-79	chrX	107656093	107656233	+	5.3	0.846	intron (NM_001847, intron 2 of 44)	intron (NM_001847, intron 2 of 44)	25495	25495	NM_033641	1288	Hs.145586	NM_001847	ENSG00000197565	COL4A6	COL4A6	CXDELq22.3|DELXq22.3	collagen, type IV, alpha 6	protein-coding	5.3	0.846	10	10	2	5.03	4.45e-05	4.66	8.2e-05	0.97
chr3-30	chr3	99386109	99386251	+	5.6	0.8	intron (NM_020351, intron 1 of 3)	intron (NM_020351, intron 1 of 3)	28740	28740	NM_001850	1295	Hs.740617	NM_001850	ENSG00000144810	COL8A1	COL8A1	C3orf7	collagen, type VIII, alpha 1	protein-coding	5.6	0.8	12	12	2.4	4.96	9.07e-06	5.83	1.84e-06	0.96
chr8-429	chr8	120087215	120087357	+	5.1	0.812	intron (NM_006438, intron 1 of 5)	intron (NM_006438, intron 1 of 5)	7862	7862	NM_006438	10584	Hs.176615	NM_006438	ENSG00000184374	COLEC10	COLEC10	CLL1	collectin sub-family member 10 (C-type lectin)	protein-coding	5.1	0.812	11	11	2	5.44	9.23e-06	5.16	1.49e-05	0.97
chr20-91	chr20	31286412	31286552	+	5.8	0.917	Intergenic	Intergenic	45332	45332	NM_001099339	149951	Hs.408427	NM_001099339	ENSG00000149600	COMMD7	COMMD7	C20orf92|dJ1085F17.3	COMM domain containing 7	protein-coding	5.8	0.917	11	11	2	5.53	7.92e-06	9.56	4.08e-08	0.97
chr17-53	chr17	17183869	17184011	+	5.6	0.857	promoter-TSS (NM_001199125)	promoter-TSS (NM_001199125)	72	72	NM_001199125	8533	Hs.6076	NM_001199125	ENSG00000141030	COPS3	COPS3	CSN3|SGN3	COP9 constitutive photomorphogenic homolog subunit 3 (Arabidopsis)	protein-coding	5.6	0.857	12	12	2.4	4.96	9.07e-06	6.94	3.04e-07	0.96
chr9-464	chr9	131091513	131091653	+	4.8	0.818	intron (NM_016035, intron 4 of 6)	MIRb|SINE|MIR	6792	6792	NM_016035	51117	Hs.98541	NM_016035	ENSG00000167113	COQ4	COQ4	CGI-92	coenzyme Q4 homolog (S. cerevisiae)	protein-coding	4.8	0.818	9	9	1.8	5.09	9.58e-05	7.92	3.14e-06	0.97
chr14-1422	chr14	74416705	74416845	+	4.8	0.75	promoter-TSS (NM_182476)	promoter-TSS (NM_182476)	138	138	NM_182480	51004	Hs.131555	NM_182476	ENSG00000119723	COQ6	COQ6	CGI10|COQ10D6	coenzyme Q6 homolog, monooxygenase (S. cerevisiae)	protein-coding	4.8	0.75	9	9	1.8	5.09	9.58e-05	10.18	3.74e-07	0.97
chr17-127	chr17	27967912	27968054	+	5.1	0.8	intron (NM_033389, intron 13 of 14)	L1ME3E|LINE|L1	-19542	19542	NM_032854	84940	Hs.143046	NM_032854	ENSG00000167549	CORO6	CORO6	-	coronin 6	protein-coding	5.1	0.8	11	11	2.4	4.55	4.58e-05	5.57	7.35e-06	0.97
chr16-117	chr16	84655079	84655219	+	5.3	0.733	Intergenic	L1MC4a|LINE|L1	-3480	3480	NM_021149	23406	Hs.289092	NM_021149	ENSG00000103187	COTL1	COTL1	CLP	coactosin-like 1 (Dictyostelium)	protein-coding	5.3	0.733	11	10	1.8	5.66	1.66e-05	5.38	2.55e-05	0.97
chr14-1417	chr14	70825703	70825843	+	4.8	0.846	intron (NM_001202548, intron 3 of 5)	MIRb|SINE|MIR	675	675	NM_001204090	51241	Hs.709581	NM_001204090	ENSG00000133983	COX16	COX16	C14orf112	COX16 cytochrome c oxidase assembly homolog (S. cerevisiae)	protein-coding	4.8	0.846	9	9	1.8	5.09	9.58e-05	8.02	2.84e-06	0.97
chr1-127	chr1	244997856	244997996	+	5.8	0.667	promoter-TSS (NM_198076)	promoter-TSS (NM_198076)	-713	713	NM_198076	116228	Hs.732085	NM_198076	ENSG00000203667	COX20	COX20	FAM36A	COX20 Cox2 chaperone homolog (S. cerevisiae)	protein-coding	5.8	0.667	11	11	2	5.53	7.92e-06	5.82	4.89e-06	0.97
chr8-649	chr8	100994907	100995047	+	4.8	0.692	intron (NM_015668, intron 21 of 27)	intron (NM_015668, intron 21 of 27)	-88735	88735	NM_004374	1345	Hs.351875	NM_004374	ENSG00000164919	COX6C	COX6C	-	cytochrome c oxidase subunit VIc	protein-coding	4.8	0.692	9	9	1.8	5.09	9.58e-05	7.12	7.31e-06	0.97
chr2-225	chr2	42647417	42647559	+	4.7	0.833	Intergenic	MIRb|SINE|MIR	-59132	59132	NM_004718	9167	Hs.741313	NM_004718	ENSG00000115944	COX7A2L	COX7A2L	COX7AR|COX7RP|EB1|SIG81	cytochrome c oxidase subunit VIIa polypeptide 2 like	protein-coding	4.7	0.833	10	10	2	4.94	5.11e-05	8.17	6.89e-07	0.97
chr11-96	chr11	63743402	63743544	+	4.7	0.846	intron (NM_004074, intron 1 of 1)	intron (NM_004074, intron 1 of 1)	1394	1394	NM_004074	1351	Hs.433901	NM_004074	ENSG00000176340	COX8A	COX8A	COX|COX8|COX8-2|COX8L|VIII|VIII-L	cytochrome c oxidase subunit VIIIA (ubiquitous)	protein-coding	4.7	0.846	11	10	2	4.94	5.11e-05	7.08	2.42e-06	0.97
chr17-23	chr17	28709515	28709655	+	6.3	0.722	intron (NM_001199775, intron 1 of 20)	intron (NM_001199775, intron 1 of 20)	2089	2089	NM_001199775	1362	Hs.446079	NM_001199775	ENSG00000108582	CPD	CPD	GP180	carboxypeptidase D	protein-coding	6.3	0.722	13	12	2	6.03	1.29e-06	5.87	1.71e-06	0.96
chr4-91	chr4	15037212	15037354	+	4.7	0.857	intron (NM_182646, intron 4 of 9)	L3|LINE|CR1	32985	32985	NM_001177381	132864	Hs.656937	NM_001177381	ENSG00000137449	CPEB2	CPEB2	CPE-BP2|CPEB-2|hCPEB-2	cytoplasmic polyadenylation element binding protein 2	protein-coding	4.7	0.857	11	10	2	4.94	5.11e-05	6.31	6.57e-06	0.97
chr5-3456	chr5	173347588	173347728	+	4.8	0.833	intron (NM_030627, intron 2 of 9)	MIR3|SINE|MIR	32327	32327	NM_030627	80315	Hs.127126	NM_030627	ENSG00000113742	CPEB4	CPEB4	-	cytoplasmic polyadenylation element binding protein 4	protein-coding	4.8	0.833	10	9	1.8	5.09	9.58e-05	5.71	4.05e-05	0.97
chr5-3461	chr5	175236172	175236312	+	5.3	0.667	intron (NM_006650, intron 2 of 4)	MIRb|SINE|MIR	12632	12632	NM_006650	10814	Hs.193235	NM_001008220	ENSG00000145920	CPLX2	CPLX2	921-L|CPX-2|CPX2|Hfb1	complexin 2	protein-coding	5.3	0.667	10	10	1.8	5.66	1.66e-05	7.19	2.13e-06	0.97
chr20-237	chr20	34261879	34262019	+	5.3	0.714	intron (NR_037570, intron 11 of 13)	intron (NR_037570, intron 11 of 13)	-9071	9071	NM_152928	8904	Hs.700188	NM_001198863	ENSG00000214078	CPNE1	CPNE1	COPN1|CPN1	copine I	protein-coding	5.3	0.714	10	10	1.8	5.66	1.66e-05	6.58	4.58e-06	0.97
chr3-259	chr3	131865136	131865278	+	4.7	0.909	Intergenic	MLT1J1|LTR|ERVL-MaLR	-111363	111363	NM_130808	131034	Hs.199877	NM_130808	ENSG00000196353	CPNE4	CPNE4	COPN4|CPN4	copine IV	protein-coding	4.7	0.909	10	10	2	4.94	5.11e-05	9.89	1.24e-07	0.97
chr3-28	chr3	98365600	98365740	+	5.8	0.733	Intergenic	Intergenic	-53215	53215	NM_000097	1371	Hs.476982	NM_000097	ENSG00000080819	CPOX	CPOX	CPO|CPX|HCP	coproporphyrinogen oxidase	protein-coding	5.8	0.733	11	11	1.8	6.22	2.63e-06	8.07	2.18e-07	0.97
chr2-214	chr2	212319949	212320089	+	5.3	0.733	intron (NM_005235, intron 20 of 27)	intron (NM_005235, intron 20 of 27)	837724	837724	NR_002763	29034	Hs.658398	NR_002763		CPS1-IT1	CPS1-IT1	CPS1-IT|CPS1IT|CPS1IT1|PRO0132	CPS1 intronic transcript 1 (non-protein coding)	miscRNA	5.3	0.733	10	10	2	5.03	4.45e-05	9.27	2.22e-07	0.97
chr1-245	chr1	207568518	207568658	+	5.3	0.667	Intergenic	L1MC1|LINE|L1	-59057	59057	NM_001006658	1380	Hs.445757	NM_001006658	ENSG00000117322	CR2	CR2	C3DR|CD21|CR|CVID7|SLEB9	complement component (3d/Epstein Barr virus) receptor 2	protein-coding	5.3	0.667	10	10	2	5.03	4.45e-05	4.66	8.2e-05	0.97
chr1-570	chr1	197406825	197406965	+	4.8	0.9	intron (NR_047564, intron 9 of 11)	intron (NR_047564, intron 9 of 11)	169561	169561	NR_047564	23418	Hs.126135	NM_001193640	ENSG00000134376	CRB1	CRB1	LCA8|RP12	crumbs homolog 1 (Drosophila)	protein-coding	4.8	0.9	9	9	1.8	5.09	9.58e-05	8.68	1.5e-06	0.97
chr7-179	chr7	28459731	28459873	+	4.7	0.769	intron (NM_182898, intron 1 of 10)	intron (NM_182898, intron 1 of 10)	7658	7658	NM_182898	9586	Hs.437075	NM_001011666	ENSG00000146592	CREB5	CREB5	CRE-BPA	cAMP responsive element binding protein 5	protein-coding	4.7	0.769	10	10	2	4.94	5.11e-05	7.98	8.47e-07	0.97
chr16-175	chr16	4000720	4000862	+	4.7	0.786	Intergenic	Intergenic	-70670	70670	NM_004380	1387	Hs.459759	NM_001079846	ENSG00000005339	CREBBP	CREBBP	CBP|KAT3A|RSTS	CREB binding protein	protein-coding	4.7	0.786	10	10	2	4.94	5.11e-05	9.64	1.55e-07	0.97
chr2-344	chr2	101995726	101995866	+	4.8	0.714	intron (NM_153836, intron 2 of 3)	intron (NM_153836, intron 2 of 3)	8169	8169	NM_153836	200407	Hs.732289	NM_153836	ENSG00000175874	CREG2	CREG2	-	cellular repressor of E1A-stimulated genes 2	protein-coding	4.8	0.714	9	9	1.8	5.09	9.58e-05	6.6	1.32e-05	0.97
chr2-121	chr2	36660888	36661030	+	5.1	0.786	intron (NM_016441, intron 2 of 16)	intron (NM_016441, intron 2 of 16)	77589	77589	NM_016441	51232	Hs.699247	NM_016441	ENSG00000150938	CRIM1	CRIM1	CRIM-1|S52	cysteine rich transmembrane BMP regulator 1 (chordin-like)	protein-coding	5.1	0.786	11	11	2	5.44	9.23e-06	7.34	5.45e-07	0.97
chr14-1410	chr14	105947448	105947590	+	4.7	0.833	Intergenic	Intergenic	3936	3936	NR_073085	1397	Hs.534309	NM_001270837	ENSG00000182809	CRIP2	CRIP2	CRIP|CRP2|ESP1	cysteine-rich protein 2	protein-coding	4.7	0.833	10	10	2	4.94	5.11e-05	8.26	6.2e-07	0.97
chr6-108	chr6	49796784	49796924	+	5.3	0.733	Intergenic	MIRb|SINE|MIR	37364	37364	NM_001131	167	Hs.109620	NM_001131	ENSG00000124812	CRISP1	CRISP1	AEGL1|ARP|CRISP-1|HSCRISP1D|HSCRISP1G|HUMARP	cysteine-rich secretory protein 1	protein-coding	5.3	0.733	10	10	1.8	5.66	1.66e-05	8.29	6.06e-07	0.97
chr17-67	chr17	29152084	29152226	+	4.7	0.765	promoter-TSS (NM_015986)	promoter-TSS (NM_015986)	-377	377	NR_073118	51379	Hs.649372	NM_015986	ENSG00000176390	CRLF3	CRLF3	CREME-9|CREME9|CYTOR4|FRWS|p48.2	cytokine receptor-like factor 3	protein-coding	4.7	0.765	12	10	2	4.94	5.11e-05	4.85	5.92e-05	0.97
chr20-177	chr20	5989181	5989321	+	4.8	0.667	intron (NM_001127458, intron 1 of 6)	intron (NM_001127458, intron 1 of 6)	1353	1353	NM_001127458	54675	Hs.224764	NM_001127458	ENSG00000088766	CRLS1	CRLS1	C20orf155|CLS|CLS1|GCD10|dJ967N21.6	cardiolipin synthase 1	protein-coding	4.8	0.667	10	9	1.8	5.09	9.58e-05	8.23	2.31e-06	0.97
chr16-147	chr16	54831377	54831517	+	4.8	0.833	Intergenic	MLT2B1|LTR|ERVL	131243	131243	NR_034106	643911	Hs.237396	NR_034105		CRNDE	CRNDE	LINC00180|NCRNA00180	colorectal neoplasia differentially expressed (non-protein coding)	miscRNA	4.8	0.833	10	9	1.8	5.09	9.58e-05	7.73	3.82e-06	0.97
chr1-150	chr1	17232042	17232184	+	5.1	0.632	Intergenic	LTR4|LTR|ERV1	-16332	16332	NM_014675	9696	Hs.309403	NM_014675	ENSG00000058453	CROCC	CROCC	ROLT	ciliary rootlet coiled-coil, rootletin	protein-coding	5.1	0.632	11	11	2.4	4.55	4.58e-05	5.34	1.09e-05	0.97
chr11-147	chr11	122653625	122653767	+	5.1	0.857	intron (NM_032873, intron 4 of 13)	intron (NM_032873, intron 4 of 13)	-55559	55559	NM_019604	56253	Hs.159523	NM_019604	ENSG00000109943	CRTAM	CRTAM	CD355	cytotoxic and regulatory T cell molecule	protein-coding	5.1	0.857	11	11	2	5.44	9.23e-06	10.87	1.13e-08	0.97
chr15-108	chr15	91031804	91031946	+	4.7	0.769	intron (NM_003870, intron 33 of 37)	intron (NM_003870, intron 33 of 37)	-41243	41243	NM_001042574	64784	Hs.567572	NM_001042574	ENSG00000140577	CRTC3	CRTC3	TORC-3|TORC3	CREB regulated transcription coactivator 3	protein-coding	4.7	0.769	10	10	2	4.94	5.11e-05	9.89	1.24e-07	0.97
chr3-25	chr3	97590140	97590282	+	5.1	0.684	intron (NM_153605, intron 3 of 21)	intron (NM_153605, intron 3 of 21)	49327	49327	NM_153605	131544	Hs.733378	NM_153605	ENSG00000080200	CRYBG3	CRYBG3	DKFZp667G2110	beta-gamma crystallin domain containing 3	protein-coding	5.1	0.684	12	11	2	5.44	9.23e-06	4.49	5.14e-05	0.97
chr13-52	chr13	21069282	21069422	+	4.8	0.833	intron (NM_015974, intron 2 of 7)	intron (NM_015974, intron 2 of 7)	30660	30660	NM_015974	51084	Hs.370703	NM_015974	ENSG00000165475	CRYL1	CRYL1	GDH|lambda-CRY	crystallin, lambda 1	protein-coding	4.8	0.833	9	9	1.8	5.09	9.58e-05	8.57	1.68e-06	0.97
chr21-52	chr21	35014318	35014458	+	4.8	0.846	promoter-TSS (NM_145858)	promoter-TSS (NM_145858)	-228	228	NM_145858	9946	Hs.352671	NM_145858	ENSG00000205758	CRYZL1	CRYZL1	4P11|QOH-1	crystallin, zeta (quinone reductase)-like 1	protein-coding	4.8	0.846	10	9	1.8	5.09	9.58e-05	6.21	2.12e-05	0.97
chr12-115	chr12	53549698	53549838	+	4.8	0.818	Intergenic	Intergenic	8509	8509	NM_001244706	51380	Hs.279815	NM_001244705	ENSG00000139631	CSAD	CSAD	CSD|PCAP	cysteine sulfinic acid decarboxylase	protein-coding	4.8	0.818	9	9	1.8	5.09	9.58e-05	10.18	3.74e-07	0.97
chr22-13	chr22	41959674	41959814	+	4.8	0.909	intron (NM_014460, intron 1 of 3)	MIRb|SINE|MIR	2730	2730	NM_014460	27254	Hs.310893	NM_014460	ENSG00000172346	CSDC2	CSDC2	PIPPIN|dJ347H13.2	cold shock domain containing C2, RNA binding	protein-coding	4.8	0.909	10	9	1.8	5.09	9.58e-05	6.74	1.12e-05	0.97
chr20-55	chr20	47675162	47675302	+	5.8	0.7	intron (NM_001316, intron 2 of 24)	intron (NM_001316, intron 2 of 24)	12449	12449	NR_045796	1434	Hs.90073	NM_001256135	ENSG00000124207	CSE1L	CSE1L	CAS|CSE1|XPO2	CSE1 chromosome segregation 1-like (yeast)	protein-coding	5.8	0.7	12	11	2	5.53	7.92e-06	5.23	1.31e-05	0.97
chr8-139	chr8	114391183	114391325	+	5.1	0.895	intron (NM_198123, intron 1 of 70)	L2a|LINE|L2	-1872	1872	NM_198124	114788	Hs.91381	NM_052900	ENSG00000164796	CSMD3	CSMD3	-	CUB and Sushi multiple domains 3	protein-coding	5.1	0.895	12	11	2	5.44	9.23e-06	4.24	8.47e-05	0.97
chr5-742	chr5	148941677	148941817	+	6.3	0.722	Intergenic	Intergenic	-10740	10740	NM_001892	1452	Hs.712555	NM_001025105	ENSG00000113712	CSNK1A1	CSNK1A1	CK1|CK1a|CK1alpha|CKIa|CKIalpha|HLCDGP1|PRO2975	casein kinase 1, alpha 1	protein-coding	6.3	0.722	12	12	2.7	4.52	2.23e-05	6.98	2.85e-07	0.96
chr3-7	chr3	47711097	47711239	+	5.6	0.722	intron (NM_003074, intron 19 of 27)	intron (NM_003074, intron 19 of 27)	-89438	89438	NM_001206942	10675	Hs.45127	NM_001206942	ENSG00000114646	CSPG5	CSPG5	NGC	chondroitin sulfate proteoglycan 5 (neuroglycan C)	protein-coding	5.6	0.722	13	12	2	5.93	1.53e-06	9.8	7.68e-09	0.96
chr12-20	chr12	51511737	51511877	+	5.8	0.765	intron (NM_005653, intron 2 of 14)	MIRb|SINE|MIR	-34353	34353	NM_030809	81566	Hs.524425	NM_030809	ENSG00000110925	CSRNP2	CSRNP2	C12orf2|C12orf22|FAM130A1|PPP1R72|TAIP-12	cysteine-serine-rich nuclear protein 2	protein-coding	5.8	0.765	11	11	1.8	6.22	2.63e-06	8.9	8.29e-08	0.97
chr2-199	chr2	166462953	166463093	+	5.3	0.909	intron (NM_024969, intron 2 of 4)	L1M5|LINE|L1	34177	34177	NM_024969	80034	Hs.470479	NM_001172173	ENSG00000178662	CSRNP3	CSRNP3	FAM130A2|PPP1R73|TAIP-2|TAIP2	cysteine-serine-rich nuclear protein 3	protein-coding	5.3	0.909	10	10	1.8	5.66	1.66e-05	9.39	1.97e-07	0.97
chr20-382	chr20	54971909	54972049	+	5.3	0.579	intron (NM_001324, intron 2 of 5)	intron (NM_001324, intron 2 of 5)	4272	4272	NM_001033522	1477	Hs.172865	NM_001033521	ENSG00000101138	CSTF1	CSTF1	CstF-50|CstFp50	cleavage stimulation factor, 3' pre-RNA, subunit 1, 50kDa	protein-coding	5.3	0.579	10	10	2	5.03	4.45e-05	4.57	9.61e-05	0.97
chr10-96	chr10	53614187	53614329	+	5.1	0.846	intron (NM_001098512, intron 4 of 17)	L1MC|LINE|L1	-154903	154903	NM_015235	23283	Hs.591358	NM_015235	ENSG00000177613	CSTF2T	CSTF2T	CstF-64T	cleavage stimulation factor, 3' pre-RNA, subunit 2, 64kDa, tau variant	protein-coding	5.1	0.846	11	11	2	5.44	9.23e-06	10.87	1.13e-08	0.97
chr18-38	chr18	20143395	20143537	+	5.1	0.632	Intergenic	Intergenic	-145588	145588	NM_172241	64693	Hs.406709	NM_022663	ENSG00000212710	CTAGE1	CTAGE1	CT21.1|CT21.2|CTAGE|CTAGE-1|CTAGE-2	cutaneous T-cell lymphoma-associated antigen 1	protein-coding	5.1	0.632	11	11	2	5.44	9.23e-06	6.01	3.63e-06	0.97
chr14-142	chr14	39752711	39752851	+	5.3	0.786	intron (NM_001247990, intron 4 of 23)	L1PA13|LINE|L1	16453	16453	NM_203355	4253	Hs.741763	NM_001247988	ENSG00000150527	CTAGE5	CTAGE5	MEA6|MGEA|MGEA11|MGEA6	CTAGE family, member 5	protein-coding	5.3	0.786	11	10	2	5.03	4.45e-05	9.92	1.2e-07	0.97
chr20-352	chr20	56095307	56095449	+	5.1	0.75	intron (NM_001269055, intron 1 of 7)	L1MEd|LINE|L1	4545	4545	NM_001269041	140690	Hs.131543	NM_001269040	ENSG00000124092	CTCFL	CTCFL	BORIS|CT27|CTCF-T|HMGB1L1|dJ579F20.2	CCCTC-binding factor (zinc finger protein)-like	protein-coding	5.1	0.75	11	11	2.4	4.55	4.58e-05	5.66	6.41e-06	0.97
chr18-112	chr18	46015851	46015991	+	4.8	0.692	Intergenic	Intergenic	-49506	49506	NM_014772	9811	Hs.145230	NM_001142397	ENSG00000134030	CTIF	CTIF	Gm672|KIAA0427	CBP80/20-dependent translation initiation factor	protein-coding	4.8	0.692	9	9	1.8	5.09	9.58e-05	7.2	6.69e-06	0.97
chr3-177	chr3	41504521	41504661	+	4.8	0.9	exon (NM_017886, exon 33 of 37)	exon (NM_017886, exon 33 of 37)	263649	263649	NM_001098209	1499	Hs.476018	NM_001098209	ENSG00000168036	CTNNB1	CTNNB1	CTNNB	catenin (cadherin-associated protein), beta 1, 88kDa	protein-coding	4.8	0.9	9	9	1.8	5.09	9.58e-05	9.46	6.79e-07	0.97
chr11-209	chr11	57566288	57566428	+	4.8	0.714	intron (NM_001085467, intron 4 of 16)	intron (NM_001085467, intron 4 of 16)	37124	37124	NM_001085467	1500	Hs.166011	NM_001085458	ENSG00000198561	CTNND1	CTNND1	CAS|CTNND|P120CAS|P120CTN|p120|p120(CAS)|p120(CTN)	catenin (cadherin-associated protein), delta 1	protein-coding	4.8	0.714	9	9	1.8	5.09	9.58e-05	5.66	4.33e-05	0.97
chr5-1039	chr5	11914409	11914551	+	5.6	0.737	Intergenic	MLT1F2|LTR|ERVL-MaLR	-10370	10370	NM_001332	1501	Hs.314543	NM_001332	ENSG00000169862	CTNND2	CTNND2	GT24|NPRAP	catenin (cadherin-associated protein), delta 2	protein-coding	5.6	0.737	12	12	2	5.93	1.53e-06	4.34	3.33e-05	0.96
chr1-162	chr1	41454225	41454367	+	5.1	0.923	exon (NM_001905, exon 5 of 19)	exon (NM_001905, exon 5 of 19)	9289	9289	NM_001905	1503	Hs.473087	NM_001905	ENSG00000171793	CTPS1	CTPS1	CTPS	CTP synthase 1	protein-coding	5.1	0.923	11	11	2	5.44	9.23e-06	6.94	9.34e-07	0.97
chr16-306	chr16	75223457	75223599	+	4.7	0.8	Intergenic	MER83B-int|LTR|ERV1	17544	17544	NM_001025200	440387	Hs.632211	NM_001025200	ENSG00000168928	CTRB2	CTRB2	-	chymotrypsinogen B2	protein-coding	4.7	0.8	10	10	2	4.94	5.11e-05	8.57	4.48e-07	0.97
chr1-520	chr1	150793909	150794049	+	4.8	0.692	intron (NM_001197325, intron 13 of 20)	Tigger2b_Pri|DNA|TcMar-Tigger	-13062	13062	NM_000396	1513	Hs.632466	NM_000396	ENSG00000143387	CTSK	CTSK	CTS02|CTSO|CTSO1|CTSO2|PKND|PYCD	cathepsin K	protein-coding	4.8	0.692	9	9	1.8	5.09	9.58e-05	7.83	3.47e-06	0.97
chr4-362	chr4	157246986	157247126	+	4.8	0.692	Intergenic	MER68|LTR|ERVL	-372008	372008	NM_001334	1519	Hs.75262	NM_001334	ENSG00000256043	CTSO	CTSO	CTSO1	cathepsin O	protein-coding	4.8	0.692	9	9	1.8	5.09	9.58e-05	7.29	6.11e-06	0.97
chr11-249	chr11	70313589	70313731	+	4.7	0.688	TTS (NM_012309)	TTS (NM_012309)	69048	69048	NM_138565	2017	Hs.596164	NM_001184740	ENSG00000085733	CTTN	CTTN	EMS1	cortactin	protein-coding	4.7	0.688	10	10	2	4.94	5.11e-05	6.2	7.67e-06	0.97
chr7-405	chr7	117410055	117410195	+	4.8	0.909	intron (NM_033427, intron 8 of 22)	intron (NM_033427, intron 8 of 22)	103436	103436	NM_033427	83992	Hs.592285	NM_033427	ENSG00000077063	CTTNBP2	CTTNBP2	C7orf8|CORTBP2|Orf4	cortactin binding protein 2	protein-coding	4.8	0.909	9	9	1.8	5.09	9.58e-05	10.18	3.74e-07	0.97
chr1-178	chr1	112924190	112924330	+	4.8	0.846	Intergenic	L2c|LINE|L2	-14540	14540	NM_018704	55917	Hs.731817	NM_018704	ENSG00000143079	CTTNBP2NL	CTTNBP2NL	-	CTTNBP2 N-terminal like	protein-coding	4.8	0.846	10	9	1.8	5.09	9.58e-05	10.06	4.13e-07	0.97
chr2-203	chr2	181241801	181241941	+	5.3	0.786	Intergenic	L3|LINE|CR1	-370091	370091	NM_020943	57703	Hs.311363	NM_020943	ENSG00000163510	CWC22	CWC22	EIF4GL|NCM|fSAPb	CWC22 spliceosome-associated protein homolog (S. cerevisiae)	protein-coding	5.3	0.786	10	10	1.8	5.66	1.66e-05	9.03	2.81e-07	0.97
chr4-22	chr4	49120664	49120804	+	8.4	0.793	Intergenic	(CATTC)n|Satellite|Satellite	132469	132469	NM_025087	80157	Hs.479703	NM_025087	ENSG00000109182	CWH43	CWH43	CWH43-C	cell wall biogenesis 43 C-terminal homolog (S. cerevisiae)	protein-coding	8.4	0.793	17	16	4	4.02	4.59e-06	4.99	3e-07	0.95
chr2-444	chr2	237685222	237685364	+	4.7	0.769	Intergenic	Intergenic	206913	206913	NM_020311	57007	Hs.471751	NM_020311	ENSG00000144476	CXCR7	CXCR7	CMKOR1|CXC-R7|CXCR-7|GPR159|RDC-1|RDC1	chemokine (C-X-C motif) receptor 7	protein-coding	4.7	0.769	10	10	2	4.94	5.11e-05	7.63	1.26e-06	0.97
chrX-131	chrX	30588437	30588577	+	4.8	0.75	intron (NM_025159, intron 2 of 2)	MIR|SINE|MIR	7526	7526	NM_025159	80231	Hs.665009	NM_025159	ENSG00000120280	CXorf21	CXorf21	-	chromosome X open reading frame 21	protein-coding	4.8	0.75	9	9	1.8	5.09	9.58e-05	10.18	3.74e-07	0.97
chrX-142	chrX	45170417	45170557	+	4.8	0.692	Intergenic	L1ME4a|LINE|L1	-110341	110341	NM_176819	79742	Hs.98321	NM_024689	ENSG00000147113	CXorf36	CXorf36	4930578C19Rik|DIA1R|EPQL1862|PRO3743|bA435K1.1	chromosome X open reading frame 36	protein-coding	4.8	0.692	9	9	1.8	5.09	9.58e-05	6.89	9.49e-06	0.97
chrX-111	chrX	125992663	125992803	+	4.8	0.769	Intergenic	L1MA1|LINE|L1	38986	38986	NM_001122716	100130613	Hs.130370	NM_001122716	ENSG00000183631	CXorf64	CXorf64	-	chromosome X open reading frame 64	protein-coding	4.8	0.769	10	9	1.8	5.09	9.58e-05	10.06	4.13e-07	0.97
chr16-415	chr16	69456839	69456979	+	4.8	0.769	Intergenic	Intergenic	-1589	1589	NM_030579	80777	Hs.461131	NM_030579	ENSG00000103018	CYB5B	CYB5B	CYB5-M|CYPB5M|OMB5	cytochrome b5 type B (outer mitochondrial membrane)	protein-coding	4.8	0.769	9	9	1.8	5.09	9.58e-05	5.66	4.33e-05	0.97
chr2-117	chr2	38319346	38319486	+	5.3	0.667	Intergenic	Intergenic	-16093	16093	NM_000104	1545	Hs.154654	NM_000104	ENSG00000138061	CYP1B1	CYP1B1	CP1B|CYPIB1|GLC3A|P4501B1	cytochrome P450, family 1, subfamily B, polypeptide 1	protein-coding	5.3	0.667	10	10	1.8	5.66	1.66e-05	6.71	3.89e-06	0.97
chr20-39	chr20	52795909	52796049	+	6.3	0.789	Intergenic	Intergenic	-5463	5463	NM_001128915	1591	Hs.89663	NM_000782	ENSG00000019186	CYP24A1	CYP24A1	CP24|CYP24|HCAI|P450-CC24	cytochrome P450, family 24, subfamily A, polypeptide 1	protein-coding	6.3	0.789	13	12	1.8	6.79	3.83e-07	4.2	4.48e-05	0.96
chr4-300	chr4	108836023	108836163	+	4.8	0.75	3' UTR (NM_001136258, exon 7 of 7)	3' UTR (NM_001136258, exon 7 of 7)	-16624	16624	NM_183075	113612	Hs.109087	NM_183075	ENSG00000155016	CYP2U1	CYP2U1	P450TEC	cytochrome P450, family 2, subfamily U, polypeptide 1	protein-coding	4.8	0.75	9	9	1.8	5.09	9.58e-05	5.66	4.33e-05	0.97
chr17-439	chr17	76702890	76703032	+	4.7	0.688	intron (NM_004762, intron 3 of 12)	L1ME1|LINE|L1	75415	75415	NM_017456	9267	Hs.191215	NM_004762	ENSG00000108669	CYTH1	CYTH1	B2-1|CYTOHESIN-1|D17S811E|PSCD1|SEC7	cytohesin 1	protein-coding	4.7	0.688	10	10	2	4.94	5.11e-05	7.01	2.64e-06	0.97
chr21-88	chr21	27777909	27778049	+	4.8	0.769	Intergenic	LTR16A|LTR|ERVL	167602	167602	NM_052954	116159	Hs.37445	NM_052954	ENSG00000166265	CYYR1	CYYR1	C21orf95	cysteine/tyrosine-rich 1	protein-coding	4.8	0.769	9	9	1.8	5.09	9.58e-05	7.29	6.11e-06	0.97
chr21-44	chr21	24894105	24894247	+	4.7	0.857	Intergenic	L1MA8|LINE|L1	-137020	137020	NR_040254	266917	Hs.145622	NR_040254		D21S2088E	D21S2088E	-	D21S2088E	miscRNA	4.7	0.857	11	10	2	4.94	5.11e-05	7.8	1.04e-06	0.97
chr14-616	chr14	59729677	59729819	+	5.1	0.706	promoter-TSS (NM_014992)	promoter-TSS (NM_014992)	-411	411	NM_014992	23002	Hs.19156	NM_001270520	ENSG00000100592	DAAM1	DAAM1	-	dishevelled associated activator of morphogenesis 1	protein-coding	5.1	0.706	11	11	2	5.44	9.23e-06	4.49	5.14e-05	0.97
chr5-196	chr5	39409647	39409789	+	6.6	0.739	intron (NM_001244871, intron 1 of 13)	intron (NM_001244871, intron 1 of 13)	15617	15617	NM_001244871	1601	Hs.696631	NM_001244871	ENSG00000153071	DAB2	DAB2	DOC-2|DOC2	disabled homolog 2, mitogen-responsive phosphoprotein (Drosophila)	protein-coding	6.6	0.739	15	14	2	6.92	3.37e-08	3.68	4.5e-05	0.96
chr9-421	chr9	124374226	124374366	+	4.8	0.818	intron (NM_032552, intron 1 of 16)	intron (NM_032552, intron 1 of 16)	44897	44897	NM_032552	153090	Hs.522378	NM_032552	ENSG00000136848	DAB2IP	DAB2IP	AF9Q34|AIP1|DIP1/2	DAB2 interacting protein	protein-coding	4.8	0.818	9	9	1.8	5.09	9.58e-05	5.92	3.06e-05	0.97
chr13-106	chr13	72454504	72454644	+	4.8	0.818	Intergenic	Intergenic	-13244	13244	NM_004392	1602	Hs.129452	NM_004392	ENSG00000165659	DACH1	DACH1	DACH	dachshund homolog 1 (Drosophila)	protein-coding	4.8	0.818	9	9	1.8	5.09	9.58e-05	10.18	3.74e-07	0.97
chr14-77	chr14	59101634	59101776	+	6.6	0.824	intron (NR_046093, intron 1 of 3)	intron (NR_046093, intron 1 of 3)	919	919	NR_046093	51339	Hs.714204	NM_001079520	ENSG00000165617	DACT1	DACT1	DAPPER|DAPPER1|DPR1|FRODO|HDPR1|THYEX3	dapper, antagonist of beta-catenin, homolog 1 (Xenopus laevis)	protein-coding	6.6	0.824	14	14	2	6.92	3.37e-08	7.9	6.64e-09	0.96
chr14-326	chr14	23006263	23006405	+	4.7	0.8	Intergenic	Intergenic	51809	51809	NM_001344	1603	Hs.82890	NM_001344	ENSG00000129562	DAD1	DAD1	OST2	defender against cell death 1	protein-coding	4.7	0.8	11	10	2	4.94	5.11e-05	8.17	6.89e-07	0.97
chr11-87	chr11	61095173	61095315	+	5.1	0.722	intron (NM_001923, intron 4 of 26)	intron (NM_001923, intron 4 of 26)	-5410	5410	NM_015533	26007	Hs.6278	NM_015533	ENSG00000149476	DAK	DAK	NET45	dihydroxyacetone kinase 2 homolog (S. cerevisiae)	protein-coding	5.1	0.722	11	11	2	5.44	9.23e-06	5.16	1.49e-05	0.97
chr13-157	chr13	105038817	105038957	+	4.8	0.9	Intergenic	Intergenic	-1079329	1079329	NM_001161814	267012	Hs.381382	NM_001161812	ENSG00000182346	DAOA	DAOA	G72|LG72|SG72	D-amino acid oxidase activator	protein-coding	4.8	0.9	9	9	1.8	5.09	9.58e-05	10.18	3.74e-07	0.97
chr13-159	chr13	106237592	106237732	+	4.8	0.833	Intergenic	MIRb|SINE|MIR	-79632	79632	NR_040247	282706	Hs.558713	NR_040247		DAOA-AS1	DAOA-AS1	DAOA-AS|DAOAAS|G30	DAOA antisense RNA 1	miscRNA	4.8	0.833	9	9	1.8	5.09	9.58e-05	6.4	1.68e-05	0.97
chr5-501	chr5	10728821	10728963	+	6.1	0.765	intron (NM_004394, intron 2 of 3)	intron (NM_004394, intron 2 of 3)	32495	32495	NM_004394	1611	Hs.75189	NM_004394	ENSG00000112977	DAP	DAP	-	death-associated protein	protein-coding	6.1	0.765	13	13	3.2	4.03	3.35e-05	4.03	3.38e-05	0.96
chr1-457	chr1	155660481	155660623	+	4.7	0.909	intron (NM_033657, intron 1 of 12)	AluJr|SINE|Alu	1667	1667	NM_004632	7818	Hs.516746	NM_001199849	ENSG00000132676	DAP3	DAP3	DAP-3|MRP-S29|MRPS29|bMRP-10	death associated protein 3	protein-coding	4.7	0.909	10	10	2	4.94	5.11e-05	9.89	1.24e-07	0.97
chr1-177	chr1	100714531	100714673	+	4.7	0.733	intron (NM_001918, intron 1 of 10)	L2c|LINE|L2	807	807	NM_001918	1629	Hs.709187	NM_001918	ENSG00000137992	DBT	DBT	BCATE2|BCKAD-E2|BCKADE2|E2|E2B	dihydrolipoamide branched chain transacylase E2	protein-coding	4.7	0.733	11	10	2	4.94	5.11e-05	7.71	1.14e-06	0.97
chr11-158	chr11	20243831	20243973	+	4.7	0.833	Intergenic	Intergenic	-62032	62032	NM_001029865	120237	Hs.558604	NM_001029865	ENSG00000109851	DBX1	DBX1	-	developing brain homeobox 1	protein-coding	4.7	0.833	10	10	2	4.94	5.11e-05	9.89	1.24e-07	0.97
chrX-109	chrX	125753685	125753825	+	5.3	0.688	Intergenic	L1M4b|LINE|L1	-66913	66913	NM_178470	139170	Hs.120403	NM_178470	ENSG00000198889	DCAF12L1	DCAF12L1	KIAA1892L|WDR40B	DDB1 and CUL4 associated factor 12-like 1	protein-coding	5.3	0.688	10	10	1.8	5.66	1.66e-05	7.66	1.22e-06	0.97
chrX-32	chrX	125012959	125013101	+	5.6	0.857	Intergenic	L1M4|LINE|L1	287050	287050	NM_001013628	340578	Hs.181867	NM_001013628	ENSG00000198354	DCAF12L2	DCAF12L2	WDR40C	DDB1 and CUL4 associated factor 12-like 2	protein-coding	5.6	0.857	12	12	2	5.93	1.53e-06	10.04	5.93e-09	0.96
chr17-140	chr17	43128560	43128700	+	4.8	0.667	intron (NM_024819, intron 1 of 4)	MIRb|SINE|MIR	348	348	NM_001128631	79877	Hs.463148	NM_001128631	ENSG00000172992	DCAKD	DCAKD	-	dephospho-CoA kinase domain containing	protein-coding	4.8	0.667	10	9	1.8	5.09	9.58e-05	5.76	3.78e-05	0.97
chr3-30	chr3	98631249	98631389	+	5.8	0.733	Intergenic	Intergenic	-10786	10786	NM_080927	131566	Hs.203691	NM_080927	ENSG00000057019	DCBLD2	DCBLD2	CLCP1|ESDN	discoidin, CUB and LCCL domain containing 2	protein-coding	5.8	0.733	11	11	1.8	6.22	2.63e-06	6.4	2.02e-06	0.97
chr12-161	chr12	91721735	91721875	+	4.8	0.75	Intergenic	Intergenic	-144999	144999	NM_001920	1634	Hs.706674	NM_001920	ENSG00000011465	DCN	DCN	CSCD|DSPG2|PG40|PGII|PGS2|SLRR1B	decorin	protein-coding	4.8	0.75	9	9	1.8	5.09	9.58e-05	9.6	6.02e-07	0.97
chr3-71	chr3	53379410	53379550	+	5.3	0.714	intron (NM_018403, intron 1 of 9)	intron (NM_018403, intron 1 of 9)	2174	2174	NM_018403	55802	Hs.476353	NM_018403		DCP1A	DCP1A	HSA275986|Nbla00360|SMAD4IP1|SMIF	DCP1 decapping enzyme homolog A (S. cerevisiae)	protein-coding	5.3	0.714	10	10	2	5.03	4.45e-05	6.97	2.77e-06	0.97
chrX-95	chrX	110657592	110657732	+	5.3	0.688	intron (NR_046489, intron 1 of 3)	intron (NR_046489, intron 1 of 3)	-2202	2202	NM_001195553	1641	Hs.34780	NM_000555	ENSG00000077279	DCX	DCX	DBCN|DC|LISX|SCLH|XLIS	doublecortin	protein-coding	5.3	0.688	10	10	2	5.03	4.45e-05	6.12	8.5e-06	0.97
chr11-91	chr11	61103689	61103829	+	5.3	0.733	intron (NM_015533, intron 2 of 17)	intron (NM_015533, intron 2 of 17)	-3075	3075	NM_001923	1642	Hs.290758	NM_001923	ENSG00000167986	DDB1	DDB1	DDBA|UV-DDB1|XAP1|XPCE|XPE|XPE-BF	damage-specific DNA binding protein 1, 127kDa	protein-coding	5.3	0.733	10	10	2	5.03	4.45e-05	5.63	1.72e-05	0.97
chr14-1100	chr14	53675376	53675516	+	4.8	0.643	Intergenic	L3|LINE|CR1	-55400	55400	NM_001160148	80821	Hs.125525	NM_001160147	ENSG00000100523	DDHD1	DDHD1	PA-PLA1|PAPLA1	DDHD domain containing 1	protein-coding	4.8	0.643	9	9	1.8	5.09	9.58e-05	6.89	9.49e-06	0.97
chr11-64	chr11	103836795	103836937	+	5.6	0.929	intron (NM_025208, intron 3 of 6)	intron (NM_025208, intron 3 of 6)	-70442	70442	NM_001001711	414301	Hs.591941	NM_001001711	ENSG00000170967	DDI1	DDI1	-	DNA-damage inducible 1 homolog 1 (S. cerevisiae)	protein-coding	5.6	0.929	12	12	2	5.93	1.53e-06	10.82	2.61e-09	0.96
chr11-68	chr11	108604076	108604216	+	5.3	0.786	intron (NM_004398, intron 13 of 17)	intron (NM_004398, intron 13 of 17)	68330	68330	NM_004398	1662	Hs.591931	NM_004398	ENSG00000178105	DDX10	DDX10	HRH-J8	DEAD (Asp-Glu-Ala-Asp) box polypeptide 10	protein-coding	5.3	0.786	11	10	1.8	5.66	1.66e-05	9.03	2.81e-07	0.97
chr1-177	chr1	112297841	112297981	+	4.8	0.769	promoter-TSS (NM_007204)	promoter-TSS (NM_007204)	-279	279	NM_007204	11218	Hs.591405	NM_007204	ENSG00000064703	DDX20	DDX20	DP103|GEMIN3	DEAD (Asp-Glu-Ala-Asp) box polypeptide 20	protein-coding	4.8	0.769	10	9	1.8	5.09	9.58e-05	7.64	4.21e-06	0.97
chr20-292	chr20	47860306	47860448	+	5.1	0.75	3' UTR (NM_017895, exon 21 of 21)	3' UTR (NM_017895, exon 21 of 21)	24545	24545	NM_017895	55661	Hs.65234	NM_017895	ENSG00000124228	DDX27	DDX27	DRS1|PP3241|RHLP|Rrp3p|dJ686N3.1	DEAD (Asp-Glu-Ala-Asp) box polypeptide 27	protein-coding	5.1	0.75	11	11	2.4	4.55	4.58e-05	5.74	5.59e-06	0.97
chr9-178	chr9	135549011	135549153	+	5.1	0.611	intron (NM_012204, intron 1 of 4)	intron (NM_012204, intron 1 of 4)	-3294	3294	NM_022779	64794	Hs.660767	NM_022779	ENSG00000125485	DDX31	DDX31	PPP1R25	DEAD (Asp-Glu-Ala-Asp) box polypeptide 31	protein-coding	5.1	0.611	11	11	2	5.44	9.23e-06	5.49	8.39e-06	0.97
chr5-6652	chr5	55047418	55047560	+	4.7	0.786	intron (NM_001166533, intron 3 of 20)	L1ME5|LINE|L1	13644	13644	NM_024415	54514	Hs.223581	NM_019039	ENSG00000152670	DDX4	DDX4	VASA	DEAD (Asp-Glu-Ala-Asp) box polypeptide 4	protein-coding	4.7	0.786	10	10	2	4.94	5.11e-05	9.89	1.24e-07	0.97
chr12-22	chr12	12965956	12966098	+	5.1	0.846	promoter-TSS (NM_016355)	promoter-TSS (NM_016355)	-253	253	NM_016355	51202	Hs.719938	NM_016355	ENSG00000213782	DDX47	DDX47	E4-DBP|HQ0256|MSTP162|RRP3	DEAD (Asp-Glu-Ala-Asp) box polypeptide 47	protein-coding	5.1	0.846	11	11	2.4	4.55	4.58e-05	7.07	7.83e-07	0.97
chr17-149	chr17	36053417	36053559	+	5.1	0.733	intron (NM_000458, intron 8 of 8)	intron (NM_000458, intron 8 of 8)	-49995	49995	NM_007010	11056	Hs.590937	NM_152300	ENSG00000141141	DDX52	DDX52	HUSSY19|ROK1	DEAD (Asp-Glu-Ala-Asp) box polypeptide 52	protein-coding	5.1	0.733	11	11	2	5.44	9.23e-06	6.7	1.31e-06	0.97
chr7-95	chr7	44614053	44614195	+	5.1	0.733	promoter-TSS (NM_019082)	promoter-TSS (NM_019082)	13	13	NM_001257189	54606	Hs.654762	NM_001257189	ENSG00000136271	DDX56	DDX56	DDX21|DDX26|NOH61	DEAD (Asp-Glu-Ala-Asp) box helicase 56	protein-coding	5.1	0.733	11	11	2	5.44	9.23e-06	7.49	4.52e-07	0.97
chr1-495	chr1	200660921	200661063	+	4.7	0.714	Intergenic	L1MC5|LINE|L1	-21866	21866	NM_001031725	83479	Hs.497332	NM_031306	ENSG00000118197	DDX59	DDX59	ZNHIT5	DEAD (Asp-Glu-Ala-Asp) box polypeptide 59	protein-coding	4.7	0.714	10	10	2	4.94	5.11e-05	6.94	2.88e-06	0.97
chr4-387	chr4	169212987	169213127	+	4.8	0.818	exon (NM_017631, exon 8 of 38)	exon (NM_017631, exon 8 of 38)	26901	26901	NM_017631	55601	Hs.591710	NM_017631	ENSG00000137628	DDX60	DDX60	-	DEAD (Asp-Glu-Ala-Asp) box polypeptide 60	protein-coding	4.8	0.818	9	9	1.8	5.09	9.58e-05	9.06	9.65e-07	0.97
chr20-461	chr20	29949479	29949619	+	4.8	0.786	Intergenic	Intergenic	-6872	6872	NM_054112	117285	Hs.274124	NM_054112	ENSG00000131068	DEFB118	DEFB118	C20orf63|DEFB-18|ESC42|ESP13.6	defensin, beta 118	protein-coding	4.8	0.786	9	9	1.8	5.09	9.58e-05	5.92	3.06e-05	0.97
chr9-420	chr9	126696268	126696410	+	4.7	0.846	Intergenic	Mam_R4|LINE|Dong-R4	-3922	3922	NM_024820	57706	Hs.568340	NM_020946	ENSG00000119522	DENND1A	DENND1A	FAM31A|KIAA1608|RP11-230L22.3	DENN/MADD domain containing 1A	protein-coding	4.7	0.846	10	10	2	4.94	5.11e-05	5.93	1.11e-05	0.97
chr7-335	chr7	140304556	140304698	+	4.7	0.556	Intergenic	L2c|LINE|L2	-2285	2285	NM_015689	27147	Hs.6385	NM_015689	ENSG00000146966	DENND2A	DENND2A	FAM31D|KIAA1277	DENN/MADD domain containing 2A	protein-coding	4.7	0.556	10	10	2	4.94	5.11e-05	7.8	1.04e-06	0.97
chr8-555	chr8	142141476	142141618	+	4.7	0.688	intron (NM_014957, intron 1 of 22)	MER3|DNA|hAT-Charlie	2827	2827	NM_014957	22898	Hs.18166	NM_014957	ENSG00000105339	DENND3	DENND3	-	DENN/MADD domain containing 3	protein-coding	4.7	0.688	11	10	2	4.94	5.11e-05	6.87	3.14e-06	0.97
chr8-31	chr8	124053711	124053853	+	6.1	0.727	intron (NM_024295, intron 1 of 7)	intron (NM_024295, intron 1 of 7)	881	881	NM_024295	79139	Hs.241576	NM_001134671	ENSG00000136986	DERL1	DERL1	DER-1|DER1	derlin 1	protein-coding	6.1	0.727	14	13	2.4	5.38	1.66e-06	4.38	1.44e-05	0.96
chr1-737	chr1	244762900	244763042	+	4.7	0.647	intron (NM_001130957, intron 17 of 21)	L2|LINE|L2	-53381	53381	NM_016076	51029	Hs.498317	NM_016076	ENSG00000121644	DESI2	DESI2	C1orf121|DESI|DESI1|DeSI-2|FAM152A|PNAS-4|PPPDE1	desumoylating isopeptidase 2	protein-coding	4.7	0.647	10	10	2	4.94	5.11e-05	6.09	8.92e-06	0.97
chr7-17	chr7	24860909	24861051	+	5.6	0.933	intron (NM_145320, intron 15 of 21)	intron (NM_145320, intron 15 of 21)	-63341	63341	NM_001127454	1687	Hs.520708	NM_001127453	ENSG00000105928	DFNA5	DFNA5	ICERE-1	deafness, autosomal dominant 5	protein-coding	5.6	0.933	14	12	2	5.93	1.53e-06	7.18	2.13e-07	0.96
chr22-15	chr22	19131989	19132131	+	4.7	0.769	exon (NM_022719, exon 1 of 10)	exon (NM_022719, exon 1 of 10)	130	130	NM_022719	8220	Hs.741535	NM_022719	ENSG00000100056	DGCR14	DGCR14	DGCR13|DGS-H|DGS-I|DGSH|DGSI|ES2|Es2el	DiGeorge syndrome critical region gene 14	protein-coding	4.7	0.769	10	10	2	4.94	5.11e-05	9.89	1.24e-07	0.97
chr7-201	chr7	14570783	14570923	+	4.8	0.9	intron (NM_004080, intron 19 of 24)	L1M4|LINE|L1	310222	310222	NM_145695	1607	Hs.567255	NM_004080	ENSG00000136267	DGKB	DGKB	DAGK2|DGK|DGK-BETA	diacylglycerol kinase, beta 90kDa	protein-coding	4.8	0.9	9	9	1.8	5.09	9.58e-05	8.13	2.56e-06	0.97
chr11-195	chr11	46384471	46384611	+	4.8	0.75	intron (NM_001105540, intron 1 of 31)	intron (NM_001105540, intron 1 of 31)	1396	1396	NM_001105540	8525	Hs.502461	NM_001105540	ENSG00000149091	DGKZ	DGKZ	DAGK5|DAGK6|DGK-ZETA|hDGKzeta	diacylglycerol kinase, zeta	protein-coding	4.8	0.75	9	9	1.8	5.09	9.58e-05	10.18	3.74e-07	0.97
chr3-26	chr3	93851923	93852063	+	5.8	0.733	Intergenic	Intergenic	-69926	69926	NM_001195643	200895	Hs.718516	NM_001195643	ENSG00000178700	DHFRL1	DHFRL1	DHFRP4	dihydrofolate reductase-like 1	protein-coding	5.8	0.733	11	11	1.8	6.22	2.63e-06	6.98	8.87e-07	0.97
chr14-308	chr14	60623391	60623533	+	5.6	0.722	intron (NM_016029, intron 1 of 6)	intron (NM_016029, intron 1 of 6)	8749	8749	NM_016029	51635	Hs.59719	NM_016029	ENSG00000100612	DHRS7	DHRS7	SDR34C1|retDSR4|retSDR4	dehydrogenase/reductase (SDR family) member 7	protein-coding	5.6	0.722	12	12	2	5.93	1.53e-06	4.45	2.59e-05	0.96
chr17-114	chr17	21031191	21031333	+	4.7	0.684	intron (NM_015510, intron 1 of 6)	intron (NM_015510, intron 1 of 6)	1021	1021	NM_015510	25979	Hs.386989	NM_015510	ENSG00000109016	DHRS7B	DHRS7B	SDR32C1	dehydrogenase/reductase (SDR family) member 7B	protein-coding	4.7	0.684	11	10	2	4.94	5.11e-05	4.99	4.69e-05	0.97
chr20-50	chr20	37591629	37591769	+	6.3	0.706	intron (NR_033905, intron 1 of 21)	intron (NR_033905, intron 1 of 21)	718	718	NM_021931	60625	Hs.444520	NM_001190809	ENSG00000101452	DHX35	DHX35	C20orf15|DDX35|KAIA0875	DEAH (Asp-Glu-Ala-His) box polypeptide 35	protein-coding	6.3	0.706	12	12	1.8	6.79	3.83e-07	4.62	1.83e-05	0.96
chr3-125	chr3	153954642	153954782	+	4.8	0.917	intron (NM_001251962, intron 11 of 14)	intron (NM_001251962, intron 11 of 14)	87574	87574	NM_020865	170506	Hs.446270	NM_001114397	ENSG00000174953	DHX36	DHX36	DDX36|G4R1|MLEL1|RHAU	DEAH (Asp-Glu-Ala-His) box polypeptide 36	protein-coding	4.8	0.917	10	9	1.8	5.09	9.58e-05	8.45	1.87e-06	0.97
chr17-423	chr17	57601230	57601372	+	4.7	0.909	Intergenic	Charlie17a|DNA|hAT-Charlie	-41585	41585	NM_001166301	79665	Hs.29403	XM_003846599	ENSG00000108406	DHX40	DHX40	DDX40|PAD	DEAH (Asp-Glu-Ala-His) box polypeptide 40	protein-coding	4.7	0.909	10	10	2	4.94	5.11e-05	9.51	1.76e-07	0.97
chr1-552	chr1	182808140	182808280	+	4.8	0.643	promoter-TSS (NR_033302)	promoter-TSS (NR_033302)	-229	229	NM_001357	1660	Hs.191518	NM_001357	ENSG00000135829	DHX9	DHX9	DDX9|LKP|NDH2|NDHII|RHA	DEAH (Asp-Glu-Ala-His) box polypeptide 9	protein-coding	4.8	0.643	9	9	1.8	5.09	9.58e-05	6.67	1.22e-05	0.97
chr12-58	chr12	122708799	122708939	+	5.3	0.786	intron (NR_024600, intron 3 of 6)	intron (NR_024600, intron 3 of 6)	3199	3199	NR_024601	56616	Hs.169611	NM_019887	ENSG00000184047	DIABLO	DIABLO	DFNA64|DIABLO-S|SMAC|SMAC3	diablo, IAP-binding mitochondrial protein	protein-coding	5.3	0.786	10	10	2	5.03	4.45e-05	11.32	3.31e-08	0.97
chr13-9	chr13	60552949	60553091	+	4.7	0.8	intron (NM_030932, intron 8 of 20)	intron (NM_030932, intron 8 of 20)	-33865	33865	NR_046539	100874195	Hs.664101	NR_046539		DIAPH3-AS1	DIAPH3-AS1	-	DIAPH3 antisense RNA 1	miscRNA	4.7	0.8	12	10	2	4.94	5.11e-05	7.71	1.14e-06	0.97
chr20-16	chr20	61555412	61555552	+	7.9	0.739	intron (NM_080797, intron 1 of 14)	intron (NM_080797, intron 1 of 14)	2421	2421	NM_001193369	11083	Hs.517172	NM_001193369	ENSG00000101191	DIDO1	DIDO1	BYE1|C20orf158|DATF-1|DATF1|DIDO2|DIDO3|DIO-1|DIO1|dJ885L7.8	death inducer-obliterator 1	protein-coding	7.9	0.739	15	15	4	3.77	1.88e-05	5.97	7.39e-08	0.95
chr1-55	chr1	209996795	209996937	+	6.1	0.714	Intergenic	Intergenic	-4446	4446	NM_014388	27042	Hs.194754	NM_014388	ENSG00000117597	DIEXF	DIEXF	C1orf107|DEF|DJ434O14.5|UTP25	digestive organ expansion factor homolog (zebrafish)	protein-coding	6.1	0.714	13	13	3.2	4.03	3.35e-05	4.49	1.12e-05	0.96
chr12-109	chr12	50942037	50942177	+	4.8	0.692	intron (NM_173602, intron 1 of 37)	intron (NM_173602, intron 1 of 37)	43339	43339	NM_173602	57609	Hs.505516	NM_173602	ENSG00000066084	DIP2B	DIP2B	-	DIP2 disco-interacting protein 2 homolog B (Drosophila)	protein-coding	4.8	0.692	9	9	1.8	5.09	9.58e-05	8.02	2.84e-06	0.97
chr2-209	chr2	189472197	189472337	+	5.3	0.786	Intergenic	MLT1I|LTR|ERVL-MaLR	182564	182564	NM_052952	116093	Hs.470892	NM_052952	ENSG00000174325	DIRC1	DIRC1	-	disrupted in renal carcinoma 1	protein-coding	5.3	0.786	10	10	1.8	5.66	1.66e-05	9.78	1.36e-07	0.97
chr2-436	chr2	232825465	232825607	+	4.7	0.917	promoter-TSS (NM_152383)	promoter-TSS (NM_152383)	-757	757	NM_152383	129563	Hs.732236	NM_001257281	ENSG00000144535	DIS3L2	DIS3L2	FAM6A|PRLMNS	DIS3 mitotic control homolog (S. cerevisiae)-like 2	protein-coding	4.7	0.917	10	10	2	4.94	5.11e-05	7.46	1.53e-06	0.97
chr1-320	chr1	232251953	232252093	+	5.3	0.688	Intergenic	L1MB5|LINE|L1	-297760	297760	NR_002227	27184	Hs.720568	NR_002227		DISC2	DISC2	DISC1-AS1|DISC1OS|NCRNA00015	disrupted in schizophrenia 2 (non-protein coding)	miscRNA	5.3	0.688	10	10	1.8	5.66	1.66e-05	9.65	1.54e-07	0.97
chr1-122	chr1	222989653	222989795	+	5.6	0.812	intron (NM_032890, intron 1 of 9)	intron (NM_032890, intron 1 of 9)	1293	1293	NM_032890	84976	Hs.692324	NM_032890	ENSG00000154309	DISP1	DISP1	DISPA	dispatched homolog 1 (Drosophila)	protein-coding	5.6	0.812	12	12	2.4	4.96	9.07e-06	5.31	4.7e-06	0.96
chr2-180	chr2	145594379	145594521	+	4.7	0.75	intron (NR_033870, intron 2 of 4)	intron (NR_033870, intron 2 of 4)	168916	168916	NR_033870	401014	Hs.742290	NR_033870		DKFZp686O1327	DKFZp686O1327	-	uncharacterized LOC401014	miscRNA	4.7	0.75	11	10	2	4.94	5.11e-05	7.63	1.26e-06	0.97
chr10-133	chr10	54117699	54117841	+	4.7	0.733	Intergenic	Intergenic	43729	43729	NM_012242	22943	Hs.40499	NM_012242	ENSG00000107984	DKK1	DKK1	DKK-1|SK	dickkopf 1 homolog (Xenopus laevis)	protein-coding	4.7	0.733	10	10	2	4.94	5.11e-05	8.79	3.58e-07	0.97
chr8-235	chr8	13145141	13145283	+	4.7	0.786	intron (NM_182643, intron 5 of 17)	intron (NM_182643, intron 5 of 17)	-154403	154403	NM_006094	10395	Hs.134296	NM_001164271	ENSG00000164741	DLC1	DLC1	ARHGAP7|HP|STARD12|p122-RhoGAP	deleted in liver cancer 1	protein-coding	4.7	0.786	11	10	2	4.94	5.11e-05	6.68	4.05e-06	0.97
chr3-309	chr3	197121806	197121948	+	4.7	0.733	Intergenic	Intergenic	-96430	96430	NM_001098424	1739	Hs.292549	NM_001098424	ENSG00000075711	DLG1	DLG1	DLGH1|SAP-97|SAP97|dJ1061C18.1.1|hdlg	discs, large homolog 1 (Drosophila)	protein-coding	4.7	0.733	10	10	2	4.94	5.11e-05	6.55	4.78e-06	0.97
chr18-24	chr18	3624685	3624827	+	6.1	0.783	intron (NM_001003809, intron 4 of 9)	intron (NM_001003809, intron 4 of 9)	30644	30644	NR_024101	649446	Hs.19872	NM_001039796		DLGAP1-AS1	DLGAP1-AS1	HsT914	DLGAP1 antisense RNA 1	miscRNA	6.1	0.783	13	13	2.4	5.38	1.66e-06	5.54	1.21e-06	0.96
chr18-31	chr18	4086184	4086324	+	4.8	0.714	intron (NM_001242761, intron 2 of 11)	intron (NM_001242761, intron 2 of 11)	-178348	178348	NR_036489	284215	Hs.647594	NR_036489		DLGAP1-AS5	DLGAP1-AS5	-	DLGAP1 antisense RNA 5	miscRNA	4.8	0.714	10	9	1.8	5.09	9.58e-05	10.18	3.74e-07	0.97
chr20-247	chr20	35088990	35089132	+	5.1	0.591	promoter-TSS (NM_001042486)	promoter-TSS (NM_001042486)	-781	781	NM_001042486	22839	Hs.249600	NM_001042486	ENSG00000080845	DLGAP4	DLGAP4	DAP4|DLP4|RP5-977B1.6|SAPAP4	discs, large (Drosophila) homolog-associated protein 4	protein-coding	5.1	0.591	11	11	2.4	4.55	4.58e-05	5.16	1.49e-05	0.97
chr14-245	chr14	55645255	55645395	+	5.8	0.733	intron (NM_001146015, intron 7 of 19)	intron (NM_001146015, intron 7 of 19)	13071	13071	NM_001146015	9787	Hs.77695	NM_001146015	ENSG00000126787	DLGAP5	DLGAP5	DLG7|HURP	discs, large (Drosophila) homolog-associated protein 5	protein-coding	5.8	0.733	11	11	2	5.53	7.92e-06	5.38	1.02e-05	0.97
chr14-1404	chr14	101227694	101227836	+	4.7	0.688	Intergenic	L1MB8|LINE|L1	34563	34563	NM_003836	8788	Hs.533717	NM_003836	ENSG00000185559	DLK1	DLK1	DLK|Delta1|FA1|PREF1|Pref-1|ZOG|pG2	delta-like 1 homolog (Drosophila)	protein-coding	4.7	0.688	10	10	2	4.94	5.11e-05	7.98	8.47e-07	0.97
chr17-149	chr17	48101882	48102022	+	5.3	0.733	Intergenic	(CATG)n|Simple_repeat|Simple_repeat	-29364	29364	NM_005220	1747	Hs.134194	NM_005220	ENSG00000064195	DLX3	DLX3	AI4|TDO	distal-less homeobox 3	protein-coding	5.3	0.733	10	10	1.8	5.66	1.66e-05	7.26	1.95e-06	0.97
chrX-132	chrX	32049951	32050091	+	4.8	0.818	intron (NM_004007, intron 43 of 77)	intron (NM_004007, intron 43 of 77)	123565	123565	NM_004021	1756	Hs.495912	NM_000109	ENSG00000198947	DMD	DMD	BMD|CMD3B|DXS142|DXS164|DXS206|DXS230|DXS239|DXS268|DXS269|DXS270|DXS272	dystrophin	protein-coding	4.8	0.818	9	9	1.8	5.09	9.58e-05	10.18	3.74e-07	0.97
chr9-30	chr9	894238	894378	+	6.3	0.737	intron (NM_021951, intron 3 of 4)	(CA)n|Simple_repeat|Simple_repeat	52618	52618	NM_021951	1761	Hs.98586	NM_021951	ENSG00000137090	DMRT1	DMRT1	DMT1	doublesex and mab-3 related transcription factor 1	protein-coding	6.3	0.737	12	12	1.8	6.79	3.83e-07	9.39	1.22e-08	0.96
chr9-187	chr9	1064607	1064749	+	4.7	0.733	Intergenic	L3|LINE|CR1	14058	14058	NM_181872	10655	Hs.59506	NM_001130865	ENSG00000173253	DMRT2	DMRT2	-	doublesex and mab-3 related transcription factor 2	protein-coding	4.7	0.733	10	10	2	4.94	5.11e-05	9.89	1.24e-07	0.97
chr9-186	chr9	934209	934351	+	4.7	0.833	intron (NM_021951, intron 4 of 4)	L1M4|LINE|L1	-42684	42684	NM_021240	58524	Hs.672740	NM_021240	ENSG00000064218	DMRT3	DMRT3	DMRTA3	doublesex and mab-3 related transcription factor 3	protein-coding	4.7	0.833	10	10	2	4.94	5.11e-05	6.14	8.27e-06	0.97
chr9-33	chr9	22237830	22237972	+	5.6	0.8	Intergenic	Intergenic	-208939	208939	NM_022160	63951	Hs.371976	NM_022160	ENSG00000176399	DMRTA1	DMRTA1	DMO|DMRT4	DMRT-like family A1	protein-coding	5.6	0.8	13	12	2	5.93	1.53e-06	4.87	1.09e-05	0.96
chr1-276	chr1	225250923	225251065	+	4.7	0.647	intron (NM_001373, intron 17 of 83)	MER2|DNA|TcMar-Tigger	133631	133631	NM_144989	127602	Hs.133977	NM_001145154	ENSG00000185842	DNAH14	DNAH14	C1orf67|Dnahc14|HL-18|HL18	dynein, axonemal, heavy chain 14	protein-coding	4.7	0.647	11	10	2	4.94	5.11e-05	9.89	1.24e-07	0.97
chr5-2214	chr5	13858888	13859030	+	5.1	0.786	intron (NM_001369, intron 30 of 78)	intron (NM_001369, intron 30 of 78)	85630	85630	NM_001369	1767	Hs.212360	NM_001369	ENSG00000039139	DNAH5	DNAH5	CILD3|DNAHC5|HL1|KTGNR|PCD	dynein, axonemal, heavy chain 5	protein-coding	5.1	0.786	11	11	2	5.44	9.23e-06	6.06	3.38e-06	0.97
chr16-112	chr16	47011259	47011401	+	5.1	0.688	Intergenic	Intergenic	-3705	3705	NM_005880	10294	Hs.368078	NM_005880	ENSG00000069345	DNAJA2	DNAJA2	CPR3|DJ3|DJA2|DNAJ|DNJ3|HIRIP4|PRO3015|RDJ2	DnaJ (Hsp40) homolog, subfamily A, member 2	protein-coding	5.1	0.688	11	11	2	5.44	9.23e-06	5.02	1.9e-05	0.97
chr2-521	chr2	183581862	183582002	+	4.8	0.733	intron (NM_018981, intron 2 of 23)	intron (NM_018981, intron 2 of 23)	933	933	NM_018981	54431	Hs.516632	NM_018981	ENSG00000077232	DNAJC10	DNAJC10	ERdj5|JPDI|PDIA19	DnaJ (Hsp40) homolog, subfamily C, member 10	protein-coding	4.8	0.733	9	9	1.8	5.09	9.58e-05	5.28	7.29e-05	0.97
chr5-3225	chr5	34978907	34979049	+	4.7	0.688	Intergenic	Intergenic	49280	49280	NM_001012339	134218	Hs.131887	NM_001012339	ENSG00000168724	DNAJC21	DNAJC21	DNAJA5|GS3|JJJ1	DnaJ (Hsp40) homolog, subfamily C, member 21	protein-coding	4.7	0.688	11	10	2	4.94	5.11e-05	5.34	2.7e-05	0.97
chr9-384	chr9	114397927	114398067	+	4.8	0.667	intron (NM_004125, intron 1 of 2)	intron (NM_004125, intron 1 of 2)	4365	4365	NM_004125	552891	Hs.534196	NM_004125	ENSG00000059769	DNAJC25-GNG10	DNAJC25-GNG10	-	DNAJC25-GNG10 readthrough	protein-coding	4.8	0.667	9	9	1.8	5.09	9.58e-05	7.04	7.98e-06	0.97
chr20-218	chr20	31377827	31377969	+	4.7	0.75	intron (NM_175849, intron 7 of 19)	intron (NM_175849, intron 7 of 19)	10240	10240	NM_175850	1789	Hs.713611	NM_001207055	ENSG00000088305	DNMT3B	DNMT3B	ICF|ICF1|M.HsaIIIB	DNA (cytosine-5-)-methyltransferase 3 beta	protein-coding	4.7	0.75	11	10	2	4.94	5.11e-05	5.93	1.11e-05	0.97
chr9-82	chr9	264025	264167	+	4.7	0.846	intron (NM_203447, intron 1 of 47)	intron (NM_203447, intron 1 of 47)	-8952	8952	NM_001190458	81704	Hs.132599	NM_001190458	ENSG00000107099	DOCK8	DOCK8	MRD2|ZIR8	dedicator of cytokinesis 8	protein-coding	4.7	0.846	11	10	2	4.94	5.11e-05	7.08	2.42e-06	0.97
chr20-856	chr20	53027875	53028015	+	4.8	0.667	Intergenic	L1M4|LINE|L1	-64321	64321	NM_018431	55816	Hs.656582	NM_018431	ENSG00000101134	DOK5	DOK5	C20orf180	docking protein 5	protein-coding	4.8	0.667	9	9	1.8	5.09	9.58e-05	5.11	9.31e-05	0.97
chr9-175	chr9	131710031	131710171	+	5.3	0.706	promoter-TSS (NM_014908)	promoter-TSS (NM_014908)	-89	89	NM_014908	22845	Hs.531563	NM_014908	ENSG00000175283	DOLK	DOLK	CDG1M|DK|DK1|SEC59|TMEM15	dolichol kinase	protein-coding	5.3	0.706	10	10	1.8	5.66	1.66e-05	6.23	7.31e-06	0.97
chr20-173	chr20	61475375	61475515	+	5.8	0.786	intron (NM_006602, intron 5 of 5)	L1MB4|LINE|L1	-1031	1031	NM_080750	100132911	Hs.126248	NM_080750		DPH3P1	DPH3P1	C20orf143|DPH3B|ZCSL1|dJ885L7.5	DPH3, KTI11 homolog (S. cerevisiae) pseudogene 1	protein-coding	5.8	0.786	11	11	1.8	6.22	2.63e-06	6.3	2.35e-06	0.97
chr2-171	chr2	115727389	115727531	+	5.1	0.786	intron (NM_001178036, intron 2 of 26)	MLT1J1|LTR|ERVL-MaLR	-94787	94787	NM_001178037	57628	Hs.580539	NM_001004360	ENSG00000175497	DPP10	DPP10	DPL2|DPPY|DPRP3	dipeptidyl-peptidase 10 (non-functional)	protein-coding	5.1	0.786	11	11	2	5.44	9.23e-06	10.61	1.45e-08	0.97
chr7-299	chr7	89723969	89724111	+	4.7	0.917	Intergenic	Intergenic	-24674	24674	NR_003551	442523	Hs.406964	NR_003551		DPY19L2P4	DPY19L2P4	-	dpy-19-like 2 pseudogene 4 (C. elegans)	pseudo	4.7	0.917	10	10	2	4.94	5.11e-05	9.89	1.24e-07	0.97
chr5-389	chr5	31531447	31531589	+	6.1	0.571	promoter-TSS (NM_018356)	promoter-TSS (NM_018356)	764	764	NM_013235	29102	Hs.97997	NM_001100412	ENSG00000113360	DROSHA	DROSHA	ETOHI2|HSA242976|RANSE3L|RN3|RNASE3L|RNASEN	drosha, ribonuclease type III	protein-coding	6.1	0.571	14	13	2	6.43	2.36e-07	3.7	7.91e-05	0.96
chr18-100	chr18	28689115	28689255	+	4.8	0.769	Intergenic	Intergenic	-6797	6797	NM_004949	1824	Hs.95612	NM_004949	ENSG00000134755	DSC2	DSC2	ARVD11|CDHF2|DG2|DGII/III|DSC3	desmocollin 2	protein-coding	4.8	0.769	9	9	1.8	5.09	9.58e-05	6.6	1.32e-05	0.97
chr18-42	chr18	29006078	29006218	+	5.3	0.667	Intergenic	Intergenic	-21584	21584	NM_001944	1830	Hs.1925	NM_001944	ENSG00000134757	DSG3	DSG3	CDHF6|PVA	desmoglein 3	protein-coding	5.3	0.667	10	10	1.8	5.66	1.66e-05	6.52	4.96e-06	0.97
chr6-176	chr6	7559251	7559393	+	4.7	0.667	intron (NM_001008844, intron 3 of 23)	intron (NM_001008844, intron 3 of 23)	17452	17452	NM_004415	1832	Hs.519873	NM_001008844	ENSG00000096696	DSP	DSP	DP|DPI|DPII	desmoplakin	protein-coding	4.7	0.667	10	10	2	4.94	5.11e-05	7.23	2.02e-06	0.97
chr1-101	chr1	212118818	212118958	+	4.8	0.75	intron (NR_037667, intron 19 of 20)	MLT1L|LTR|ERVL-MaLR	-90031	90031	NM_016448	51514	Hs.656473	NM_016448	ENSG00000143476	DTL	DTL	CDT2|DCAF2|L2DTL|RAMP	denticleless E3 ubiquitin protein ligase homolog (Drosophila)	protein-coding	4.8	0.75	11	9	1.8	5.09	9.58e-05	5.15	8.77e-05	0.97
chr6-183	chr6	15650281	15650423	+	4.7	0.733	intron (NR_036448, intron 4 of 9)	intron (NR_036448, intron 4 of 9)	12937	12937	NR_036448	84062	Hs.571148	NM_032122	ENSG00000047579	DTNBP1	DTNBP1	BLOC1S8|DBND|HPS7|My031|SDY	dystrobrevin binding protein 1	protein-coding	4.7	0.733	10	10	2	4.94	5.11e-05	7.01	2.64e-06	0.97
chr11-40	chr11	58942028	58942168	+	5.8	0.812	intron (NM_015177, intron 1 of 8)	intron (NM_015177, intron 1 of 8)	2286	2286	NM_015177	23220	Hs.523696	NM_015177	ENSG00000110042	DTX4	DTX4	RNF155	deltex homolog 4 (Drosophila)	protein-coding	5.8	0.812	11	11	1.8	6.22	2.63e-06	6.86	1.05e-06	0.97
chr5-747	chr5	172193707	172193847	+	6.3	0.812	Intergenic	Intergenic	4426	4426	NM_004417	1843	Hs.171695	NM_004417	ENSG00000120129	DUSP1	DUSP1	CL100|HVH1|MKP-1|MKP1|PTPN10	dual specificity phosphatase 1	protein-coding	6.3	0.812	12	12	1.8	6.79	3.83e-07	5.63	2.58e-06	0.96
chr1-619	chr1	221914881	221915023	+	4.7	0.714	intron (NM_007207, intron 1 of 3)	intron (NM_007207, intron 1 of 3)	564	564	NM_007207	11221	Hs.732301	NM_007207	ENSG00000143507	DUSP10	DUSP10	MKP-5|MKP5	dual specificity phosphatase 10	protein-coding	4.7	0.714	10	10	2	4.94	5.11e-05	5.42	2.37e-05	0.97
chr1-530	chr1	161719013	161719153	+	4.8	0.692	promoter-TSS (NM_007240)	promoter-TSS (NM_007240)	-498	498	NM_007240	11266	Hs.416216	NM_007240	ENSG00000081721	DUSP12	DUSP12	DUSP1|YVH1	dual specificity phosphatase 12	protein-coding	4.8	0.692	9	9	1.8	5.09	9.58e-05	7.29	6.11e-06	0.97
chr17-308	chr17	35836296	35836438	+	4.7	0.765	intron (NM_001166105, intron 15 of 15)	intron (NM_001166105, intron 15 of 15)	-13584	13584	NM_007026	11072	Hs.91448	NM_007026	ENSG00000161326	DUSP14	DUSP14	MKP-L|MKP6	dual specificity phosphatase 14	protein-coding	4.7	0.765	10	10	2	4.94	5.11e-05	5.07	4.17e-05	0.97
chr12-68	chr12	12642237	12642377	+	4.8	0.692	intron (NM_030640, intron 4 of 6)	intron (NM_030640, intron 4 of 6)	73141	73141	NM_030640	80824	Hs.536535	NM_030640	ENSG00000111266	DUSP16	DUSP16	MKP-7|MKP7	dual specificity phosphatase 16	protein-coding	4.8	0.692	9	9	1.8	5.09	9.58e-05	8.13	2.56e-06	0.97
chr2-112	chr2	241500862	241501002	+	5.3	0.8	3' UTR (NM_001033575, exon 2 of 3)	3' UTR (NM_001033575, exon 2 of 3)	1461	1461	NM_001033575	285193	Hs.369297	NM_001033575	ENSG00000188542	DUSP28	DUSP28	DUSP26|VHP	dual specificity phosphatase 28	protein-coding	5.3	0.8	11	10	2	5.03	4.45e-05	6.84	3.29e-06	0.97
chr8-233	chr8	29214842	29214982	+	5.3	0.846	Intergenic	L1MA5|LINE|L1	-6645	6645	NM_001394	1846	Hs.417962	NM_001394	ENSG00000120875	DUSP4	DUSP4	HVH2|MKP-2|MKP2|TYP	dual specificity phosphatase 4	protein-coding	5.3	0.846	10	10	1.8	5.66	1.66e-05	8.92	3.15e-07	0.97
chr10-201	chr10	112287142	112287282	+	4.8	0.667	Intergenic	MIRb|SINE|MIR	29587	29587	NM_004419	1847	Hs.2128	NM_004419	ENSG00000138166	DUSP5	DUSP5	DUSP|HVH3	dual specificity phosphatase 5	protein-coding	4.8	0.667	9	9	1.8	5.09	9.58e-05	5.37	6.43e-05	0.97
chr7-301	chr7	95332444	95332586	+	4.7	0.909	Intergenic	L1MD2|LINE|L1	-69303	69303	NM_004411	1780	Hs.440364	NM_001135556	ENSG00000158560	DYNC1I1	DYNC1I1	DNCI1|DNCIC1	dynein, cytoplasmic 1, intermediate chain 1	protein-coding	4.7	0.909	10	10	2	4.94	5.11e-05	8.26	6.2e-07	0.97
chr3-170	chr3	32614627	32614767	+	4.8	0.9	Intergenic	Intergenic	-2331	2331	NM_016141	51143	Hs.529495	NM_016141	ENSG00000144635	DYNC1LI1	DYNC1LI1	DNCLI1|LIC1	dynein, cytoplasmic 1, light intermediate chain 1	protein-coding	4.8	0.9	9	9	1.8	5.09	9.58e-05	6.74	1.12e-05	0.97
chr16-84	chr16	66777787	66777929	+	4.7	0.75	intron (NM_006141, intron 3 of 12)	L1MC5|LINE|L1	7667	7667	NM_006141	1783	Hs.369068	NM_006141	ENSG00000135720	DYNC1LI2	DYNC1LI2	DNCLI2|LIC2	dynein, cytoplasmic 1, light intermediate chain 2	protein-coding	4.7	0.75	12	10	2	4.94	5.11e-05	5.22	3.26e-05	0.97
chr16-315	chr16	80479502	80479644	+	4.7	0.769	Intergenic	Intergenic	-95281	95281	NM_130897	83657	Hs.98849	NM_130897	ENSG00000168589	DYNLRB2	DYNLRB2	DNCL2B|DNLC2B|ROBLD2	dynein, light chain, roadblock-type 2	protein-coding	4.7	0.769	10	10	2	4.94	5.11e-05	7.39	1.68e-06	0.97
chr1-242	chr1	206808124	206808264	+	5.3	0.647	promoter-TSS (NM_003582)	promoter-TSS (NM_003582)	-687	687	NM_003582	8444	Hs.164267	NM_001004023	ENSG00000143479	DYRK3	DYRK3	DYRK5|RED|REDK|hYAK3-2	dual-specificity tyrosine-(Y)-phosphorylation regulated kinase 3	protein-coding	5.3	0.647	10	10	2	5.03	4.45e-05	4.79	6.59e-05	0.97
chr8-291	chr8	110491828	110491970	+	5.1	0.786	intron (NM_177531, intron 54 of 77)	intron (NM_177531, intron 54 of 77)	-60030	60030	NM_198120	9166	Hs.409368	NM_004215	ENSG00000147654	EBAG9	EBAG9	EB9|PDAF|RCAS1	estrogen receptor binding site associated, antigen, 9	protein-coding	5.1	0.786	11	11	2.4	4.55	4.58e-05	4.36	6.63e-05	0.97
chr5-6800	chr5	158220566	158220708	+	4.7	0.769	intron (NM_024007, intron 9 of 15)	MIR|SINE|MIR	306151	306151	NM_024007	1879	Hs.573143	NM_024007	ENSG00000164330	EBF1	EBF1	COE1|EBF|O/E-1|OLF1	early B-cell factor 1	protein-coding	4.7	0.769	10	10	2	4.94	5.11e-05	7.46	1.53e-06	0.97
chr3-159	chr3	73359245	73359387	+	4.7	0.786	Intergenic	Intergenic	248506	248506	NM_018029	55096	Hs.658858	NM_018029	ENSG00000255423	EBLN2	EBLN2	EBLN-2	endogenous Bornavirus-like nucleoprotein 2	protein-coding	4.7	0.786	10	10	2	4.94	5.11e-05	9.89	1.24e-07	0.97
chr2-64	chr2	109539343	109539485	+	6.1	0.708	intron (NM_022336, intron 5 of 11)	intron (NM_022336, intron 5 of 11)	66414	66414	NM_022336	10913	Hs.171971	NM_022336	ENSG00000135960	EDAR	EDAR	DL|ED1R|ED3|ED5|EDA-A1R|EDA1R|EDA3|HRM1	ectodysplasin A receptor	protein-coding	6.1	0.708	13	13	2.4	5.38	1.66e-06	7.46	4.39e-08	0.96
chr3-42	chr3	5236871	5237013	+	5.1	0.667	exon (NM_014674, exon 2 of 12)	exon (NM_014674, exon 2 of 12)	7583	7583	NM_014674	9695	Hs.224616	NM_014674	ENSG00000134109	EDEM1	EDEM1	EDEM	ER degradation enhancer, mannosidase alpha-like 1	protein-coding	5.1	0.667	11	11	2	5.44	9.23e-06	6.7	1.31e-06	0.97
chr20-18	chr20	33735301	33735443	+	7	0.789	promoter-TSS (NM_018217)	promoter-TSS (NM_018217)	-211	211	NM_001145025	55741	Hs.720177	NM_001145025	ENSG00000088298	EDEM2	EDEM2	C20orf31|C20orf49|bA4204.1	ER degradation enhancer, mannosidase alpha-like 2	protein-coding	7	0.789	15	15	2.4	6.21	4.51e-08	5.21	4.08e-07	0.95
chr1-222	chr1	184745669	184745809	+	4.8	0.733	Intergenic	Intergenic	-21698	21698	NM_025191	80267	Hs.523811	NM_025191	ENSG00000116406	EDEM3	EDEM3	C1orf22	ER degradation enhancer, mannosidase alpha-like 3	protein-coding	4.8	0.733	10	9	1.8	5.09	9.58e-05	9.32	7.65e-07	0.97
chr5-1574	chr5	83545956	83546096	+	5.3	0.75	intron (NM_005711, intron 2 of 10)	intron (NM_005711, intron 2 of 10)	134585	134585	NM_005711	10085	Hs.482730	NM_005711	ENSG00000164176	EDIL3	EDIL3	DEL1	EGF-like repeats and discoidin I-like domains 3	protein-coding	5.3	0.75	11	10	1.8	5.66	1.66e-05	7.26	1.95e-06	0.97
chr11-32	chr11	85955103	85955245	+	6.1	0.696	promoter-TSS (NM_152991)	promoter-TSS (NM_152991)	-632	632	NM_152991	8726	Hs.503510	NM_003797	ENSG00000074266	EED	EED	HEED|WAIT1	embryonic ectoderm development	protein-coding	6.1	0.696	13	13	2.4	5.38	1.66e-06	7.28	5.8e-08	0.96
chr17-37	chr17	45383189	45383329	+	6.3	0.765	intron (NM_000212, intron 13 of 14)	MIR|SINE|MIR	-18068	18068	NM_152347	124989	Hs.463303	NM_001195192	ENSG00000178852	EFCAB13	EFCAB13	C17orf57	EF-hand calcium binding domain 13	protein-coding	6.3	0.765	12	12	1.8	6.79	3.83e-07	7.97	7.07e-08	0.96
chr17-224	chr17	28113854	28113994	+	4.8	0.733	intron (NM_033389, intron 2 of 14)	AluJo|SINE|Alu	-142950	142950	NM_001145053	374786	Hs.662411	NM_001033562	ENSG00000176927	EFCAB5	EFCAB5	-	EF-hand calcium binding domain 5	protein-coding	4.8	0.733	9	9	1.8	5.09	9.58e-05	7.37	5.58e-06	0.97
chr5-746	chr5	171637525	171637665	+	6.3	0.867	3' UTR (NM_152277, exon 3 of 3)	3' UTR (NM_152277, exon 3 of 3)	16419	16419	NM_001171183	285588	Hs.716824	NM_001171183	ENSG00000214360	EFCAB9	EFCAB9	-	EF-hand calcium binding domain 9	protein-coding	6.3	0.867	12	12	1.8	6.79	3.83e-07	8.71	2.74e-08	0.96
chr6-245	chr6	52304776	52304916	+	4.8	0.818	intron (NR_033327, intron 3 of 9)	intron (NR_033327, intron 3 of 9)	19041	19041	NM_001172420	114327	Hs.403171	NM_001172420	ENSG00000096093	EFHC1	EFHC1	dJ304B14.2	EF-hand domain (C-terminal) containing 1	protein-coding	4.8	0.818	9	9	1.8	5.09	9.58e-05	10.18	3.74e-07	0.97
chr5-6938	chr5	107093679	107093819	+	4.8	0.9	Intergenic	Intergenic	-87153	87153	NM_001962	1946	Hs.288741	NM_001962	ENSG00000184349	EFNA5	EFNA5	AF1|EFL5|EPLG7|GLC1M|LERK7|RAGS	ephrin-A5	protein-coding	4.8	0.9	9	9	1.8	5.09	9.58e-05	9.75	5.32e-07	0.97
chr9-185	chr9	139525652	139525792	+	5.3	0.647	Intergenic	(CA)n|Simple_repeat|Simple_repeat	-27586	27586	NR_046367	51162	Hs.91481	NM_016215	ENSG00000172889	EGFL7	EGFL7	NEU1|RP11-251M1.2|VE-STATIN|ZNEU1	EGF-like-domain, multiple 7	protein-coding	5.3	0.647	10	10	2	5.03	4.45e-05	8	8.26e-07	0.97
chr5-1680	chr5	38265595	38265737	+	5.6	0.591	intron (NM_152403, intron 1 of 21)	intron (NM_152403, intron 1 of 21)	7155	7155	NM_152403	133584	Hs.20103	NM_182799	ENSG00000164318	EGFLAM	EGFLAM	AGRINL|AGRNL	EGF-like, fibronectin type III and laminin G domains	protein-coding	5.6	0.591	12	12	2	5.93	1.53e-06	5.83	1.84e-06	0.96
chr5-3296	chr5	38289412	38289554	+	5.1	0.706	intron (NR_046219, intron 1 of 3)	MLT1I|LTR|ERVL-MaLR	1605	1605	NR_046219	100852408	Hs.570954	NR_046219		EGFLAM-AS4	EGFLAM-AS4	-	EGFLAM antisense RNA 4	miscRNA	5.1	0.706	11	11	2	5.44	9.23e-06	4.9	2.39e-05	0.97
chr14-730	chr14	34058949	34059091	+	4.7	0.923	intron (NM_001165893, intron 4 of 10)	intron (NM_001165893, intron 4 of 10)	361264	361264	NM_022073	112399	Hs.135507	NM_022073	ENSG00000129521	EGLN3	EGLN3	HIFP4H3|HIFPH3|PHD3	egl nine homolog 3 (C. elegans)	protein-coding	4.7	0.923	10	10	2	4.94	5.11e-05	4.89	5.59e-05	0.97
chr11-35	chr11	34706729	34706869	+	5.8	0.733	Intergenic	Intergenic	52788	52788	NM_001206616	26298	Hs.653859	NM_001206615	ENSG00000135373	EHF	EHF	ESE3|ESE3B|ESEJ	ets homologous factor	protein-coding	5.8	0.733	11	11	2	5.53	7.92e-06	9.22	5.86e-08	0.97
chr12-125	chr12	104725167	104725309	+	4.7	0.632	intron (NM_001261445, intron 11 of 14)	intron (NM_001261445, intron 11 of 14)	27728	27728	NM_001008394	493861	Hs.659857	NM_001008394	ENSG00000255150	EID3	EID3	NS4EB|NSE4B|NSMCE4B	EP300 interacting inhibitor of differentiation 3	protein-coding	4.7	0.632	10	10	2	4.94	5.11e-05	5.93	1.11e-05	0.97
chr17-9	chr17	39845199	39845341	+	13.6	0.938	5' UTR (NM_005801, exon 1 of 4)	5' UTR (NM_005801, exon 1 of 4)	143	143	NM_005801	10209	Hs.150580	NM_005801	ENSG00000173812	EIF1	EIF1	A121|EIF-1|EIF1A|ISO1|SUI1	eukaryotic translation initiation factor 1	protein-coding	13.6	0.938	30	29	2.4	12	1.43e-21	13.07	1.44e-22	0.91
chr2-238	chr2	37361739	37361879	+	4.8	0.6	intron (NM_001135651, intron 10 of 16)	HERVFH19-int|LTR|ERV1	13156	13156	NM_001135652	5610	Hs.131431	NM_001135651	ENSG00000055332	EIF2AK2	EIF2AK2	EIF2AK1|PKR|PRKR	eukaryotic translation initiation factor 2-alpha kinase 2	protein-coding	4.8	0.6	9	9	1.8	5.09	9.58e-05	8.13	2.56e-06	0.97
chr2-138	chr2	88956239	88956379	+	5.3	0.714	Intergenic	Intergenic	-29215	29215	NM_004836	9451	Hs.591589	NM_004836	ENSG00000172071	EIF2AK3	EIF2AK3	PEK|PERK|WRS	eukaryotic translation initiation factor 2-alpha kinase 3	protein-coding	5.3	0.714	10	10	1.8	5.66	1.66e-05	8.1	7.46e-07	0.97
chr1-143	chr1	36419667	36419807	+	4.8	0.769	intron (NM_177422, intron 2 of 16)	intron (NM_177422, intron 2 of 16)	23054	23054	NM_177422	192669	Hs.657659	NM_024852	ENSG00000126070	EIF2C3	EIF2C3	AGO3	eukaryotic translation initiation factor 2C, 3	protein-coding	4.8	0.769	10	9	1.8	5.09	9.58e-05	8.68	1.5e-06	0.97
chr20-110	chr20	32698461	32698603	+	5.6	0.519	intron (NM_003908, intron 1 of 8)	intron (NM_003908, intron 1 of 8)	1553	1553	NM_003908	8894	Hs.429180	NM_003908	ENSG00000125977	EIF2S2	EIF2S2	EIF2|EIF2B|EIF2beta|PPP1R67|eIF-2-beta	eukaryotic translation initiation factor 2, subunit 2 beta, 38kDa	protein-coding	5.6	0.519	12	12	2.4	4.96	9.07e-06	4.32	3.49e-05	0.96
chr8-46	chr8	109243195	109243335	+	6.3	0.8	intron (NM_001568, intron 5 of 12)	L1ME2|LINE|L1	17694	17694	NM_001568	3646	Hs.405590	NM_001568	ENSG00000104408	EIF3E	EIF3E	EIF3-P48|EIF3S6|INT6|eIF3-p46	eukaryotic translation initiation factor 3, subunit E	protein-coding	6.3	0.8	12	12	1.8	6.79	3.83e-07	5.6	2.76e-06	0.96
chr8-66	chr8	117725422	117725564	+	6.1	0.7	intron (NM_003756, intron 2 of 7)	intron (NM_003756, intron 2 of 7)	42569	42569	NM_003756	8667	Hs.492599	NM_003756	ENSG00000147677	EIF3H	EIF3H	EIF3S3|eIF3-gamma|eIF3-p40	eukaryotic translation initiation factor 3, subunit H	protein-coding	6.1	0.7	13	13	2.4	5.38	1.66e-06	3.79	6.19e-05	0.96
chr7-389	chr7	109834296	109834436	+	4.8	0.818	Intergenic	Intergenic	-234096	234096	NR_003024	442720	Hs.535194	NR_003024		EIF3IP1	EIF3IP1	RG208K23	eukaryotic translation initiation factor 3, subunit I pseudogene 1	pseudo	4.8	0.818	9	9	1.8	5.09	9.58e-05	9.9	4.69e-07	0.97
chr12-114	chr12	53375044	53375184	+	4.8	0.818	Intergenic	Intergenic	-24948	24948	NM_001417	1975	Hs.702041	NM_018507	ENSG00000063046	EIF4B	EIF4B	EIF-4B|PRO1843	eukaryotic translation initiation factor 4B	protein-coding	4.8	0.818	9	9	1.8	5.09	9.58e-05	10.18	3.74e-07	0.97
chr4-112	chr4	99715590	99715732	+	4.7	0.846	Intergenic	Intergenic	134582	134582	NM_001130678	1977	Hs.249718	NM_001130678	ENSG00000151247	EIF4E	EIF4E	CBP|EIF4E1|EIF4EL1|EIF4F	eukaryotic translation initiation factor 4E	protein-coding	4.7	0.846	11	10	2	4.94	5.11e-05	5.83	1.28e-05	0.97
chr3-205	chr3	71728378	71728518	+	4.8	0.643	TTS (NM_001134649)	TTS (NM_001134649)	46078	46078	NM_001134651	317649	Hs.581355	NM_001134649	ENSG00000163412	EIF4E3	EIF4E3	-	eukaryotic translation initiation factor 4E family member 3	protein-coding	4.8	0.643	9	9	1.8	5.09	9.58e-05	6.82	1.03e-05	0.97
chr14-690	chr14	103751508	103751650	+	4.7	0.8	Intergenic	Intergenic	-48760	48760	NM_001969	1983	Hs.741278	NM_001969	ENSG00000100664	EIF5	EIF5	EIF-5|EIF-5A	eukaryotic translation initiation factor 5	protein-coding	4.7	0.8	11	10	2	4.94	5.11e-05	8.36	5.57e-07	0.97
chr2-144	chr2	100024174	100024314	+	5.3	0.667	intron (NM_001037872, intron 15 of 22)	intron (NM_001037872, intron 15 of 22)	70410	70410	NM_015904	9669	Hs.158688	NM_015904	ENSG00000158417	EIF5B	EIF5B	IF2	eukaryotic translation initiation factor 5B	protein-coding	5.3	0.667	10	10	1.8	5.66	1.66e-05	7.04	2.54e-06	0.97
chr9-54	chr9	23827402	23827542	+	5.3	0.846	Intergenic	Intergenic	-1409	1409	NM_004432	1993	Hs.166109	NM_001171195	ENSG00000107105	ELAVL2	ELAVL2	HEL-N1|HELN1|HUB	ELAV (embryonic lethal, abnormal vision, Drosophila)-like 2 (Hu antigen B)	protein-coding	5.3	0.846	11	10	1.8	5.66	1.66e-05	7.91	9.13e-07	0.97
chr11-35	chr11	34585643	34585785	+	5.1	0.824	Intergenic	Intergenic	-50367	50367	NM_001243080	2001	Hs.11713	NM_001243080	ENSG00000135374	ELF5	ELF5	ESE2	E74-like factor 5 (ets domain transcription factor)	protein-coding	5.1	0.824	12	11	2	5.44	9.23e-06	5.79	5.21e-06	0.97
chr1-88	chr1	205600131	205600271	+	5.3	0.8	intron (NM_021795, intron 1 of 2)	intron (NM_021795, intron 1 of 2)	1799	1799	NM_001973	2005	Hs.602654	NM_001973	ENSG00000158711	ELK4	ELK4	SAP1	ELK4, ETS-domain protein (SRF accessory protein 1)	protein-coding	5.3	0.8	11	10	1.8	5.66	1.66e-05	5.63	1.72e-05	0.97
chr14-1387	chr14	74264454	74264596	+	4.7	0.786	Intergenic	Intergenic	-10629	10629	NM_001043318	91748	Hs.594157	NM_001043318	ENSG00000156030	ELMSAN1	ELMSAN1	C14orf117|C14orf43|LSR68|c14_5541	ELM2 and Myb/SANT-like domain containing 1	protein-coding	4.7	0.786	10	10	2	4.94	5.11e-05	6.74	3.73e-06	0.97
chr7-249	chr7	73373059	73373199	+	4.8	0.818	Intergenic	L1MEf|LINE|L1	-69298	69298	NM_001081753	2006	Hs.647061	NM_000501	ENSG00000049540	ELN	ELN	SVAS|WBS|WS	elastin	protein-coding	4.8	0.818	9	9	1.8	5.09	9.58e-05	7.04	7.98e-06	0.97
chr4-301	chr4	111046459	111046599	+	4.8	0.75	intron (NM_024090, intron 1 of 3)	intron (NM_024090, intron 1 of 3)	73242	73242	NM_001130721	79071	Hs.412939	NM_001130721	ENSG00000170522	ELOVL6	ELOVL6	FACE|FAE|LCE	ELOVL fatty acid elongase 6	protein-coding	4.8	0.75	9	9	1.8	5.09	9.58e-05	10.18	3.74e-07	0.97
chr1-430	chr1	80418677	80418817	+	4.8	0.909	Intergenic	L2|LINE|L2	-946252	946252	NM_022159	64123	Hs.132314	NM_022159	ENSG00000162618	ELTD1	ELTD1	ETL|KPG_003	EGF, latrophilin and seven transmembrane domain containing 1	protein-coding	4.8	0.909	9	9	1.8	5.09	9.58e-05	9.46	6.79e-07	0.97
chr8-112	chr8	109437191	109437333	+	5.1	0.619	Intergenic	MLT1B|LTR|ERVL-MaLR	-18591	18591	NM_014673	9694	Hs.654351	NM_014673	ENSG00000104412	EMC2	EMC2	KIAA0103|TTC35	ER membrane protein complex subunit 2	protein-coding	5.1	0.619	12	11	2	5.44	9.23e-06	5.57	7.35e-06	0.97
chr3-151	chr3	10017599	10017739	+	4.8	0.833	intron (NM_018447, intron 3 of 7)	intron (NM_018447, intron 3 of 7)	10853	10853	NM_018447	55831	Hs.475392	NM_018447	ENSG00000125037	EMC3	EMC3	POB|TMEM111	ER membrane protein complex subunit 3	protein-coding	4.8	0.833	9	9	1.8	5.09	9.58e-05	7.64	4.21e-06	0.97
chr4-114	chr4	101711418	101711558	+	4.8	0.786	Intergenic	L2c|LINE|L2	-115218	115218	NR_046811	100874275	Hs.136318	NR_046811		EMCN-IT3	EMCN-IT3	-	EMCN intronic transcript 3 (non-protein coding)	miscRNA	4.8	0.786	10	9	1.8	5.09	9.58e-05	7.55	4.63e-06	0.97
chr20-284	chr20	40020733	40020873	+	5.3	0.846	Intergenic	Intergenic	-25305	25305	NM_052846	90187	Hs.726525	NM_052846	ENSG00000183798	EMILIN3	EMILIN3	C20orf130|EMILIN5|dJ620E11.4	elastin microfibril interfacer 3	protein-coding	5.3	0.846	10	10	2	5.03	4.45e-05	6.77	3.58e-06	0.97
chr10-209	chr10	119403700	119403840	+	4.8	0.818	Intergenic	L1MD3|LINE|L1	-99191	99191	NR_002791	196047	Hs.312592	NR_002791		EMX2OS	EMX2OS	EMX2-AS1|NCRNA00045	EMX2 opposite strand/antisense RNA	miscRNA	4.8	0.818	9	9	1.8	5.09	9.58e-05	10.18	3.74e-07	0.97
chr1-649	chr1	225832340	225832482	+	4.7	0.8	intron (NM_001008493, intron 1 of 14)	intron (NM_001008493, intron 1 of 14)	8434	8434	NM_001008493	55740	Hs.497893	NM_001008493	ENSG00000154380	ENAH	ENAH	ENA|MENA|NDPP1	enabled homolog (Drosophila)	protein-coding	4.7	0.8	10	10	2	4.94	5.11e-05	4.75	7.01e-05	0.97
chr5-3367	chr5	73700273	73700413	+	4.8	0.786	Intergenic	Intergenic	236906	236906	NM_001256575	8507	Hs.104925	NM_001256574	ENSG00000171617	ENC1	ENC1	CCL28|ENC-1|KLHL35|KLHL37|NRPB|PIG10|TP53I10	ectodermal-neural cortex 1 (with BTB-like domain)	protein-coding	4.8	0.786	10	9	1.8	5.09	9.58e-05	8.8	1.35e-06	0.97
chr11-384	chr11	94873895	94874035	+	4.8	0.769	Intergenic	Intergenic	50991	50991	NM_015036	23052	Hs.167115	NM_015036	ENSG00000149218	ENDOD1	ENDOD1	-	endonuclease domain containing 1	protein-coding	4.8	0.769	9	9	1.8	5.09	9.58e-05	9.06	9.65e-07	0.97
chr13-17	chr13	43923386	43923528	+	4.7	0.786	intron (NM_001242863, intron 8 of 16)	intron (NM_001242863, intron 8 of 16)	280156	280156	NM_001127615	55068	Hs.128258	NM_001127615	ENSG00000120658	ENOX1	ENOX1	CNOX|PIG38|bA64J21.1|cCNOX	ecto-NOX disulfide-thiol exchanger 1	protein-coding	4.7	0.786	11	10	2	4.94	5.11e-05	8.07	7.65e-07	0.97
chr8-433	chr8	120658934	120659076	+	5.1	0.688	Intergenic	Intergenic	-7899	7899	NM_006209	5168	Hs.190977	NM_001040092	ENSG00000136960	ENPP2	ENPP2	ATX|ATX-X|AUTOTAXIN|LysoPLD|NPP2|PD-IALPHA|PDNP2	ectonucleotide pyrophosphatase/phosphodiesterase 2	protein-coding	5.1	0.688	11	11	2	5.44	9.23e-06	4.93	2.26e-05	0.97
chr1-519	chr1	150585952	150586092	+	4.8	0.714	Intergenic	MIR3|SINE|MIR	15587	15587	NM_207045	2029	Hs.632456	NM_004436	ENSG00000143420	ENSA	ENSA	ARPP-19e	endosulfine alpha	protein-coding	4.8	0.714	9	9	1.8	5.09	9.58e-05	7.04	7.98e-06	0.97
chr20-85	chr20	25182804	25182944	+	5.3	0.706	intron (NM_001114089, intron 1 of 13)	Tigger2a|DNA|TcMar-Tigger	6535	6535	NM_001114089	955	Hs.500375	NM_001114089	ENSG00000197586	ENTPD6	ENTPD6	CD39L2|IL-6SAG|IL6ST2|NTPDase-6|dJ738P15.3	ectonucleoside triphosphate diphosphohydrolase 6 (putative)	protein-coding	5.3	0.706	11	10	1.8	5.66	1.66e-05	6.12	8.5e-06	0.97
chr3-17	chr3	27738770	27738910	+	5.8	0.867	Intergenic	MLT1A1|LTR|ERVL-MaLR	24945	24945	NM_005442	8320	Hs.591663	NM_005442	ENSG00000163508	EOMES	EOMES	TBR2	eomesodermin	protein-coding	5.8	0.867	11	11	2	5.53	7.92e-06	11.07	8.67e-09	0.97
chr2-122	chr2	46235091	46235231	+	4.8	0.714	intron (NM_005400, intron 9 of 14)	intron (NM_005400, intron 9 of 14)	-289380	289380	NM_001430	2034	Hs.468410	NM_001430	ENSG00000116016	EPAS1	EPAS1	ECYT4|HIF2A|HLF|MOP2|PASD2|bHLHe73	endothelial PAS domain protein 1	protein-coding	4.8	0.714	10	9	1.8	5.09	9.58e-05	6.97	8.71e-06	0.97
chr20-10	chr20	34675225	34675367	+	7.5	0.903	Intergenic	MIR3|SINE|MIR	-4130	4130	NM_001258331	2036	Hs.437422	NM_001258329	ENSG00000088367	EPB41L1	EPB41L1	4.1N|MRD11	erythrocyte membrane protein band 4.1-like 1	protein-coding	7.5	0.903	17	16	4	3.97	5.34e-06	4.81	4.8e-07	0.95
chr2-75	chr2	120771705	120771847	+	5.6	0.714	intron (NM_001184938, intron 1 of 16)	intron (NM_001184938, intron 1 of 16)	991	991	NM_001184938	57669	Hs.369232	NM_001184937	ENSG00000115109	EPB41L5	EPB41L5	BE37|YMO1	erythrocyte membrane protein band 4.1 like 5	protein-coding	5.6	0.714	13	12	2	5.93	1.53e-06	7	2.78e-07	0.96
chr2-260	chr2	47599338	47599478	+	4.8	0.818	intron (NM_002354, intron 1 of 8)	intron (NM_002354, intron 1 of 8)	3121	3121	NM_002354	4072	Hs.542050	NM_002354	ENSG00000119888	EPCAM	EPCAM	DIAR5|EGP-2|EGP314|EGP40|ESA|HNPCC8|KS1/4|KSA|M4S1|MIC18|MK-1|TACSTD1|TROP1	epithelial cell adhesion molecule	protein-coding	4.8	0.818	9	9	1.8	5.09	9.58e-05	8.68	1.5e-06	0.97
chr4-230	chr4	75199424	75199566	+	4.7	0.786	Intergenic	AluSz6|SINE|Alu	25308	25308	NM_001270991	255324	Hs.401237	NM_001270989	ENSG00000182585	EPGN	EPGN	ALGV3072|EPG|PRO9904	epithelial mitogen homolog (mouse)	protein-coding	4.7	0.786	10	10	2	4.94	5.11e-05	6.81	3.42e-06	0.97
chr7-337	chr7	143113923	143114065	+	4.7	0.769	intron (NR_033897, intron 2 of 4)	intron (NR_033897, intron 2 of 4)	-8009	8009	NM_005232	2041	Hs.89839	NM_005232	ENSG00000146904	EPHA1	EPHA1	EPH|EPHT|EPHT1	EPH receptor A1	protein-coding	4.7	0.769	10	10	2	4.94	5.11e-05	7.71	1.14e-06	0.97
chr3-170	chr3	89327312	89327454	+	4.7	0.714	intron (NM_182644, intron 3 of 6)	intron (NM_182644, intron 3 of 6)	170709	170709	NM_182644	2042	Hs.123642	NM_005233	ENSG00000044524	EPHA3	EPHA3	EK4|ETK|ETK1|HEK|HEK4|TYRO4	EPH receptor A3	protein-coding	4.7	0.714	10	10	2	4.94	5.11e-05	7.23	2.02e-06	0.97
chr3-240	chr3	96444826	96444966	+	4.8	0.846	Intergenic	Intergenic	-88529	88529	NM_001080448	285220	Hs.653244	NM_001080448	ENSG00000080224	EPHA6	EPHA6	EK12|EPA6|PRO57066	EPH receptor A6	protein-coding	4.8	0.846	9	9	1.8	5.09	9.58e-05	5.82	3.52e-05	0.97
chr1-63	chr1	226019504	226019646	+	5.6	0.765	exon (NM_000120, exon 3 of 9)	exon (NM_000120, exon 3 of 9)	6573	6573	NM_000120	2052	Hs.89649	NM_000120	ENSG00000143819	EPHX1	EPHX1	EPHX|EPOX|HYL1|MEH	epoxide hydrolase 1, microsomal (xenobiotic)	protein-coding	5.6	0.765	13	12	2	5.93	1.53e-06	8.09	6.07e-08	0.96
chr1-260	chr1	220218253	220218395	+	5.1	0.722	intron (NM_004446, intron 1 of 31)	intron (NM_004446, intron 1 of 31)	1676	1676	NM_004446	2058	Hs.497788	NM_004446	ENSG00000136628	EPRS	EPRS	EARS|GLUPRORS|PARS|QARS|QPRS	glutamyl-prolyl-tRNA synthetase	protein-coding	5.1	0.722	11	11	2	5.44	9.23e-06	5.87	4.52e-06	0.97
chr1-471	chr1	110316042	110316182	+	4.8	0.833	Intergenic	L3|LINE|CR1	-9468	9468	NM_024526	79574	Hs.485352	NM_024526	ENSG00000198758	EPS8L3	EPS8L3	EPS8R3	EPS8-like 3	protein-coding	4.8	0.833	9	9	1.8	5.09	9.58e-05	6.6	1.32e-05	0.97
chr5-6678	chr5	96204920	96205062	+	4.7	0.923	Intergenic	Intergenic	-6653	6653	NM_001130140	64167	Hs.482910	NM_001130140	ENSG00000164308	ERAP2	ERAP2	L-RAP|LRAP	endoplasmic reticulum aminopeptidase 2	protein-coding	4.7	0.923	10	10	2	4.94	5.11e-05	6.37	6.08e-06	0.97
chr5-6883	chr5	65202964	65203104	+	4.8	0.643	Intergenic	Intergenic	-19348	19348	NM_001253701	55914	Hs.740465	NM_001006600	ENSG00000112851	ERBB2IP	ERBB2IP	ERBIN|LAP2	erbb2 interacting protein	protein-coding	4.8	0.643	9	9	1.8	5.09	9.58e-05	8.8	1.35e-06	0.97
chr12-24	chr12	1101892	1102032	+	4.8	0.846	intron (NR_027948, intron 1 of 19)	intron (NR_027948, intron 1 of 19)	1558	1558	NR_027946	23085	Hs.601216	NM_178039	ENSG00000082805	ERC1	ERC1	Cast2|ELKS|RAB6IP2	ELKS/RAB6-interacting/CAST family member 1	protein-coding	4.8	0.846	10	9	1.8	5.09	9.58e-05	5.92	3.06e-05	0.97
chr10-66	chr10	50760788	50760930	+	6.6	0.933	Intergenic	Intergenic	-13712	13712	NM_000124	2074	Hs.654449	NM_000124	ENSG00000225830	ERCC6	ERCC6	ARMD5|CKN2|COFS|COFS1|CSB|RAD26|UVSS1	excision repair cross-complementing rodent repair deficiency, complementation group 6	protein-coding	6.6	0.933	14	14	2.4	5.79	2.83e-07	8.17	4.41e-09	0.96
chr4-231	chr4	75236468	75236610	+	4.7	0.688	intron (NM_001432, intron 1 of 4)	intron (NM_001432, intron 1 of 4)	5679	5679	NM_001432	2069	Hs.115263	NM_001432	ENSG00000124882	EREG	EREG	ER	epiregulin	protein-coding	4.7	0.688	10	10	2	4.94	5.11e-05	4.99	4.69e-05	0.97
chr21-87	chr21	39859443	39859585	+	4.7	0.588	intron (NM_001243428, intron 3 of 11)	intron (NM_001243428, intron 3 of 11)	10914	10914	NM_001136155	2078	Hs.473819	NM_001136154	ENSG00000157554	ERG	ERG	erg-3|p55	v-ets erythroblastosis virus E26 oncogene homolog (avian)	protein-coding	4.7	0.588	10	10	2	4.94	5.11e-05	7.71	1.14e-06	0.97
chr5-1803	chr5	172295665	172295807	+	5.1	0.875	intron (NM_001031711, intron 1 of 9)	L1MC1|LINE|L1	34513	34513	NM_001031711	57222	Hs.509163	NM_001031711	ENSG00000113719	ERGIC1	ERGIC1	ERGIC-32|ERGIC32|NET24	endoplasmic reticulum-golgi intermediate compartment (ERGIC) 1	protein-coding	5.1	0.875	12	11	2	5.44	9.23e-06	5.87	4.52e-06	0.97
chr8-96	chr8	8861404	8861544	+	5.8	0.857	intron (NM_153332, intron 1 of 6)	L2|LINE|L2	1160	1160	NM_153332	90459	Hs.20000	NM_153332	ENSG00000104626	ERI1	ERI1	3'HEXO|HEXO|THEX1	exoribonuclease 1	protein-coding	5.8	0.857	11	11	1.8	6.22	2.63e-06	10.06	2.46e-08	0.97
chr14-35	chr14	53166902	53167044	+	6.6	0.81	Intergenic	Intergenic	-4554	4554	NM_014584	30001	Hs.592304	NM_014584	ENSG00000197930	ERO1L	ERO1L	ERO1-alpha|ERO1A	ERO1-like (S. cerevisiae)	protein-coding	6.6	0.81	15	14	3.2	4.34	7.56e-06	5.12	1.2e-06	0.96
chr9-377	chr9	102860315	102860455	+	4.8	0.769	intron (NM_015051, intron 1 of 11)	intron (NM_015051, intron 1 of 11)	945	945	NM_015051	23071	Hs.154023	NM_015051	ENSG00000023318	ERP44	ERP44	PDIA10|TXNDC4	endoplasmic reticulum protein 44	protein-coding	4.8	0.769	9	9	1.8	5.09	9.58e-05	6.97	8.71e-06	0.97
chr6-104	chr6	11132043	11132185	+	5.1	0.733	intron (NM_001135575, intron 1 of 1)	L1MB7|LINE|L1	-20043	20043	NM_207582	405754	Hs.631996	NM_207582	ENSG00000244476	ERVFRD-1	ERVFRD-1	ERVFRDE1|GLLL6191|HERV-FRD|HERV-W/FRD|UNQ6191|envFRD	endogenous retrovirus group FRD, member 1	protein-coding	5.1	0.733	11	11	2	5.44	9.23e-06	7.71	3.38e-07	0.97
chr13-19	chr13	47307244	47307386	+	5.1	0.846	intron (NM_015116, intron 17 of 18)	intron (NM_015116, intron 17 of 18)	64052	64052	NM_001984	2098	Hs.432491	NM_001984	ENSG00000139684	ESD	ESD	FGH	esterase D	protein-coding	5.1	0.846	11	11	2	5.44	9.23e-06	8.68	1.07e-07	0.97
chr16-67	chr16	68268099	68268239	+	5.8	0.8	intron (NM_024939, intron 2 of 14)	intron (NM_024939, intron 2 of 14)	1967	1967	NM_024939	80004	Hs.592053	NM_024939	ENSG00000103067	ESRP2	ESRP2	RBM35B	epithelial splicing regulatory protein 2	protein-coding	5.8	0.8	12	11	2	5.53	7.92e-06	6.4	2.02e-06	0.97
chr11-97	chr11	64077465	64077605	+	5.3	0.846	intron (NM_004451, intron 2 of 6)	MIR|SINE|MIR	4491	4491	NM_004451	2101	Hs.110849	NM_004451	ENSG00000173153	ESRRA	ESRRA	ERR1|ERRa|ERRalpha|ESRL1|NR3B1	estrogen-related receptor alpha	protein-coding	5.3	0.846	10	10	2	5.03	4.45e-05	7.41	1.62e-06	0.97
chr14-1389	chr14	76800108	76800250	+	4.7	0.909	Intergenic	MER33|DNA|hAT-Charlie	-37511	37511	NM_004452	2103	Hs.435845	NM_004452	ENSG00000119715	ESRRB	ESRRB	DFNB35|ERR2|ERRb|ESRL2|NR3B2	estrogen-related receptor beta	protein-coding	4.7	0.909	10	10	2	4.94	5.11e-05	9.89	1.24e-07	0.97
chr1-695	chr1	217092472	217092612	+	4.8	0.692	intron (NM_001243507, intron 2 of 7)	intron (NM_001243507, intron 2 of 7)	20473	20473	NM_001243512	2104	Hs.738938	NM_001134285	ENSG00000196482	ESRRG	ESRRG	ERR3|ERRgamma|NR3B3	estrogen-related receptor gamma	protein-coding	4.8	0.692	9	9	1.8	5.09	9.58e-05	6.4	1.68e-05	0.97
chrX-182	chrX	103516424	103516564	+	4.8	0.846	Intergenic	L1MC4|LINE|L1	-16895	16895	NM_153448	80712	Hs.223782	NM_153448	ENSG00000123576	ESX1	ESX1	ESX1L|ESXR1	ESX homeobox 1	protein-coding	4.8	0.846	9	9	1.8	5.09	9.58e-05	6.34	1.82e-05	0.97
chr5-6973	chr5	137876319	137876459	+	4.8	0.909	intron (NM_004730, intron 2 of 10)	intron (NM_004730, intron 2 of 10)	1011	1011	NR_045992	2107	Hs.483494	NM_004730	ENSG00000120705	ETF1	ETF1	D5S1995|ERF|ERF1|RF1|SUP45L1|TB3-1	eukaryotic translation termination factor 1	protein-coding	4.8	0.909	9	9	1.8	5.09	9.58e-05	6.04	2.65e-05	0.97
chr15-105	chr15	76604695	76604837	+	4.7	0.706	promoter-TSS (NM_001127716)	promoter-TSS (NM_001127716)	-956	956	NM_001127716	2108	Hs.39925	NM_000126	ENSG00000140374	ETFA	ETFA	EMA|GA2|MADD	electron-transfer-flavoprotein, alpha polypeptide	protein-coding	4.7	0.706	10	10	2	4.94	5.11e-05	4.6	9.21e-05	0.97
chr21-29	chr21	40185726	40185868	+	5.6	0.789	intron (NM_005239, intron 3 of 9)	intron (NM_005239, intron 3 of 9)	8042	8042	NM_005239	2114	Hs.644231	NM_001256295	ENSG00000157557	ETS2	ETS2	ETS2IT1	v-ets erythroblastosis virus E26 oncogene homolog 2 (avian)	protein-coding	5.6	0.789	13	12	2	5.93	1.53e-06	7	2.78e-07	0.96
chr7-102	chr7	13673925	13674065	+	5.3	0.786	Intergenic	L1MC3|LINE|L1	352144	352144	NM_001163150	2115	Hs.22634	NM_001163147	ENSG00000006468	ETV1	ETV1	ER81	ets variant 1	protein-coding	5.3	0.786	10	10	1.8	5.66	1.66e-05	9.92	1.2e-07	0.97
chr17-361	chr17	41661287	41661429	+	4.7	0.667	Intergenic	L2c|LINE|L2	-37558	37558	NM_001079675	2118	Hs.434059	NM_001079675	ENSG00000175832	ETV4	ETV4	E1A-F|E1AF|PEA3|PEAS3	ets variant 4	protein-coding	4.7	0.667	10	10	2	4.94	5.11e-05	6.43	5.61e-06	0.97
chr17-102	chr17	29644802	29644942	+	5.3	0.846	3' UTR (NM_014210, exon 2 of 2)	3' UTR (NM_014210, exon 2 of 2)	-3742	3742	NM_006495	2124	Hs.5509	NM_006495	ENSG00000185862	EVI2B	EVI2B	CD361|D17S376|EVDB	ecotropic viral integration site 2B	protein-coding	5.3	0.846	10	10	1.8	5.66	1.66e-05	5.14	3.7e-05	0.97
chr1-450	chr1	93124066	93124206	+	4.8	0.818	intron (NM_005665, intron 11 of 17)	L1PB4|LINE|L1	133825	133825	NM_005665	7813	Hs.594434	NM_005665	ENSG00000067208	EVI5	EVI5	NB4S	ecotropic viral integration site 5	protein-coding	4.8	0.818	9	9	1.8	5.09	9.58e-05	7.29	6.11e-06	0.97
chr7-177	chr7	27303047	27303189	+	4.7	0.769	Intergenic	Intergenic	20954	20954	NM_001989	2128	Hs.369879	NM_001989	ENSG00000106038	EVX1	EVX1	-	even-skipped homeobox 1	protein-coding	4.7	0.769	10	10	2	4.94	5.11e-05	9.89	1.24e-07	0.97
chr15-13	chr15	41523044	41523184	+	6.3	0.857	promoter-TSS (NM_152596)	promoter-TSS (NM_152596)	-219	219	NM_152596	161829	Hs.307999	NM_152596	ENSG00000178997	EXD1	EXD1	EXDL1	exonuclease 3'-5' domain containing 1	protein-coding	6.3	0.857	12	12	1.8	6.79	3.83e-07	11.27	1.67e-09	0.96
chr1-725	chr1	241946911	241947053	+	4.7	0.75	intron (NM_144625, intron 22 of 26)	intron (NM_144625, intron 22 of 26)	-64511	64511	NM_130398	9156	Hs.498248	NM_003686	ENSG00000174371	EXO1	EXO1	HEX1|hExoI	exonuclease 1	protein-coding	4.7	0.75	10	10	2	4.94	5.11e-05	5.51	2.08e-05	0.97
chr4-227	chr4	56720517	56720657	+	4.8	0.818	intron (NM_001024924, intron 1 of 18)	intron (NM_001024924, intron 1 of 18)	771	771	NM_178237	55763	Hs.269665	NM_001024924	ENSG00000090989	EXOC1	EXOC1	BM-102|SEC3|SEC3L1|SEC3P	exocyst complex component 1	protein-coding	4.8	0.818	9	9	1.8	5.09	9.58e-05	6.82	1.03e-05	0.97
chr6-182	chr6	704776	704916	+	4.8	0.833	Intergenic	Intergenic	-11705	11705	NM_018303	55770	Hs.484412	NM_018303	ENSG00000112685	EXOC2	EXOC2	SEC5|SEC5L1|Sec5p	exocyst complex component 2	protein-coding	4.8	0.833	9	9	1.8	5.09	9.58e-05	9.06	9.65e-07	0.97
chr14-57	chr14	57739499	57739639	+	6.9	0.765	intron (NR_026895, intron 1 of 6)	intron (NR_026895, intron 1 of 6)	-3952	3952	NM_006544	10640	Hs.645295	NM_006544	ENSG00000070367	EXOC5	EXOC5	HSEC10|PRO1912|SEC10|SEC10L1|SEC10P	exocyst complex component 5	protein-coding	6.9	0.765	13	13	3.3	3.92	4.45e-05	5.39	1.64e-06	0.96
chr10-163	chr10	94582074	94582216	+	4.7	0.733	Intergenic	Intergenic	-12325	12325	NM_001013848	54536	Hs.655657	NM_001013848	ENSG00000138190	EXOC6	EXOC6	EXOC6A|SEC15|SEC15L|SEC15L1|SEC15L3|Sec15p	exocyst complex component 6	protein-coding	4.7	0.733	10	10	2	4.94	5.11e-05	7.31	1.84e-06	0.97
chr9-452	chr9	133556305	133556447	+	4.7	0.857	intron (NM_021619, intron 4 of 4)	MIRc|SINE|MIR	-12782	12782	NM_014285	23404	Hs.654643	NM_014285	ENSG00000130713	EXOSC2	EXOSC2	RRP4|Rrp4p|hRrp4p|p7	exosome component 2	protein-coding	4.7	0.857	10	10	2	4.94	5.11e-05	8.47	5e-07	0.97
chr8-1231	chr8	145129069	145129211	+	4.7	0.611	Intergenic	Arthur1B|DNA|hAT-Tip100	-4382	4382	NM_019037	54512	Hs.632041	NM_019037	ENSG00000178896	EXOSC4	EXOSC4	RRP41|RRP41A|Rrp41p|SKI6|Ski6p|hRrp41p|p12A	exosome component 4	protein-coding	4.7	0.611	10	10	2	4.94	5.11e-05	8.57	4.48e-07	0.97
chr8-30	chr8	119043142	119043282	+	6.9	0.625	intron (NM_000127, intron 1 of 10)	intron (NM_000127, intron 1 of 10)	80846	80846	NM_000127	2131	Hs.492618	NM_000127	ENSG00000182197	EXT1	EXT1	EXT|LGCR|LGS|TRPS2|TTV	exostosin 1	protein-coding	6.9	0.625	13	13	1.8	7.36	5.15e-08	3.83	5.6e-05	0.96
chr11-179	chr11	44166389	44166531	+	4.7	0.769	intron (NM_001178083, intron 8 of 14)	intron (NM_001178083, intron 8 of 14)	48713	48713	NM_000401	2132	Hs.368404	NM_000401	ENSG00000151348	EXT2	EXT2	SOTV	exostosin 2	protein-coding	4.7	0.769	10	10	2	4.94	5.11e-05	7.55	1.39e-06	0.97
chr8-572	chr8	28472600	28472742	+	4.7	0.688	Intergenic	L1M4b|LINE|L1	-86482	86482	NM_001440	2137	Hs.491354	NM_001440	ENSG00000012232	EXTL3	EXTL3	BOTV|EXTR1|REG|REGR|RPR	exostoses (multiple)-like 3	protein-coding	4.7	0.688	10	10	2	4.94	5.11e-05	9.89	1.24e-07	0.97
chr6-234	chr6	66007986	66008128	+	4.7	0.769	intron (NM_001142800, intron 11 of 42)	intron (NM_001142800, intron 11 of 42)	281640	281640	NM_198283	346007	Hs.25067	NM_001142800	ENSG00000188107	EYS	EYS	C6orf178|C6orf179|C6orf180|EGFL10|EGFL11|RP25|SPAM|bA166P24.2|bA307F22.3|bA74E24.1|dJ1018A4.2|dJ22I17.2|dJ303F19.1	eyes shut homolog (Drosophila)	protein-coding	4.7	0.769	10	10	2	4.94	5.11e-05	9.89	1.24e-07	0.97
chr4-159	chr4	187289678	187289820	+	4.7	0.846	intron (NR_033900, intron 1 of 3)	L1MC5|LINE|L1	102631	102631	NM_000128	2160	Hs.1430	NM_000128	ENSG00000088926	F11	F11	FXI	coagulation factor XI	protein-coding	4.7	0.846	11	10	2	4.94	5.11e-05	5.69	1.58e-05	0.97
chr1-45	chr1	160992152	160992294	+	6.1	0.929	Intergenic	Intergenic	-1090	1090	NM_016946	50848	Hs.517293	NM_016946	ENSG00000158769	F11R	F11R	CD321|JAM|JAM1|JAMA|JCAM|KAT|PAM-1	F11 receptor	protein-coding	6.1	0.929	13	13	2	6.43	2.36e-07	10.49	8.25e-10	0.96
chr1-349	chr1	31840225	31840367	+	4.7	0.909	exon (NM_004102, exon 3 of 4)	exon (NM_004102, exon 3 of 4)	5627	5627	NM_004102	2170	Hs.657242	NM_004102	ENSG00000121769	FABP3	FABP3	FABP11|H-FABP|M-FABP|MDGI|O-FABP	fatty acid binding protein 3, muscle and heart (mammary-derived growth inhibitor)	protein-coding	4.7	0.909	10	10	2	4.94	5.11e-05	9.51	1.76e-07	0.97
chr8-246	chr8	82199592	82199732	+	5.3	0.714	Intergenic	Intergenic	6944	6944	NM_001444	2171	Hs.408061	NM_001444	ENSG00000164687	FABP5	FABP5	E-FABP|EFABP|KFABP|PA-FABP|PAFABP	fatty acid binding protein 5 (psoriasis-associated)	protein-coding	5.3	0.714	10	10	2	5.03	4.45e-05	6.77	3.58e-06	0.97
chr1-151	chr1	51171787	51171927	+	5.3	0.846	intron (NM_007051, intron 6 of 18)	intron (NM_007051, intron 6 of 18)	254079	254079	NM_007051	11124	Hs.530402	NM_007051	ENSG00000185104	FAF1	FAF1	HFAF1s|UBXD12|UBXN3A|hFAF1	Fas (TNFRSF6) associated factor 1	protein-coding	5.3	0.846	10	10	1.8	5.66	1.66e-05	6.64	4.22e-06	0.97
chr1-527	chr1	207085803	207085945	+	4.7	0.611	intron (NM_005449, intron 3 of 7)	intron (NM_005449, intron 3 of 7)	9361	9361	NM_001193338	9214	Hs.741469	NM_001142472	ENSG00000162894	FAIM3	FAIM3	FCMR|TOSO	Fas apoptotic inhibitory molecule 3	protein-coding	4.7	0.611	10	10	2	4.94	5.11e-05	4.66	8.27e-05	0.97
chr5-126	chr5	14469560	14469702	+	7	0.889	intron (NM_007118, intron 37 of 56)	L1M5|LINE|L1	-112260	112260	NM_019018	54491	Hs.155085	NM_019018	ENSG00000145569	FAM105A	FAM105A	NET20	family with sequence similarity 105, member A	protein-coding	7	0.889	15	15	4	3.72	2.16e-05	3.96	1.07e-05	0.95
chr5-995	chr5	14637496	14637636	+	5.3	0.611	Intergenic	LTR16D1|LTR|ERVL	-27217	27217	NM_138348	90268	Hs.406335	NM_138348	ENSG00000154124	FAM105B	FAM105B	-	family with sequence similarity 105, member B	protein-coding	5.3	0.611	11	10	2	5.03	4.45e-05	4.7	7.77e-05	0.97
chr9-131	chr9	74510753	74510893	+	4.8	0.667	intron (NM_001025780, intron 1 of 3)	intron (NM_001025780, intron 1 of 3)	15325	15325	NM_001025780	51104	Hs.380389	NM_001025780	ENSG00000107362	FAM108B1	FAM108B1	C9orf77|RP11-409O11.2	family with sequence similarity 108, member B1	protein-coding	4.8	0.667	10	9	1.8	5.09	9.58e-05	6.6	1.32e-05	0.97
chr9-447	chr9	129073021	129073161	+	4.8	0.818	Intergenic	MIR|SINE|MIR	-16032	16032	NM_001011703	89853	Hs.162659	NM_001011703	ENSG00000196814	FAM125B	FAM125B	C9orf28|MVB12B	family with sequence similarity 125, member B	protein-coding	4.8	0.818	9	9	1.8	5.09	9.58e-05	7.37	5.58e-06	0.97
chr1-561	chr1	184842557	184842697	+	4.8	0.769	intron (NM_052966, intron 5 of 13)	MER34A|LTR|ERV1	101055	101055	NM_052966	116496	Hs.518662	NM_052966	ENSG00000135842	FAM129A	FAM129A	C1orf24|NIBAN	family with sequence similarity 129, member A	protein-coding	4.8	0.769	9	9	1.8	5.09	9.58e-05	6.97	8.71e-06	0.97
chrX-123	chrX	93233805	93233947	+	4.7	0.647	Intergenic	Intergenic	304864	304864	NM_001171111	286499	Hs.110069	NM_001171109	ENSG00000179083	FAM133A	FAM133A	CT115	family with sequence similarity 133, member A	protein-coding	4.7	0.647	10	10	2	4.94	5.11e-05	8.68	4.01e-07	0.97
chr7-371	chr7	92274690	92274830	+	4.8	0.714	intron (NM_001259, intron 5 of 7)	intron (NM_001259, intron 5 of 7)	-55054	55054	NM_001040057	257415	Hs.489105	NM_001040057	ENSG00000234545	FAM133B	FAM133B	-	family with sequence similarity 133, member B	protein-coding	4.8	0.714	9	9	1.8	5.09	9.58e-05	6.04	2.65e-05	0.97
chr7-370	chr7	92217559	92217699	+	4.8	0.9	intron (NM_001040057, intron 1 of 11)	intron (NM_001040057, intron 1 of 11)	2067	2067	NR_034169	728066	Hs.470311	NR_034169		FAM133DP	FAM133DP	-	family with sequence similarity 133, member A pseudogene	pseudo	4.8	0.9	9	9	1.8	5.09	9.58e-05	6.28	1.96e-05	0.97
chr5-130	chr5	16616183	16616325	+	6.1	0.577	intron (NM_001034850, intron 1 of 8)	intron (NM_001034850, intron 1 of 8)	913	913	NM_001034850	54463	Hs.481704	NM_001034850	ENSG00000154153	FAM134B	FAM134B	JK-1|JK1	family with sequence similarity 134, member B	protein-coding	6.1	0.577	15	13	3.2	4.03	3.35e-05	3.98	3.87e-05	0.96
chr6-272	chr6	71127300	71127440	+	4.8	0.917	intron (NM_001105531, intron 2 of 21)	intron (NM_001105531, intron 2 of 21)	4263	4263	NM_001105531	57579	Hs.211700	NM_001105531	ENSG00000082269	FAM135A	FAM135A	KIAA1411	family with sequence similarity 135, member A	protein-coding	4.8	0.917	9	9	1.8	5.09	9.58e-05	6.28	1.96e-05	0.97
chr2-129	chr2	70609453	70609595	+	4.7	0.8	Intergenic	Intergenic	-80304	80304	NM_032822	84908	Hs.516077	NM_032822	ENSG00000035141	FAM136A	FAM136A	-	family with sequence similarity 136, member A	protein-coding	4.7	0.8	11	10	2	4.94	5.11e-05	6.68	4.05e-06	0.97
chr5-3388	chr5	137369993	137370133	+	4.8	0.833	Intergenic	Intergenic	-1261	1261	NM_001101801	51306	Hs.567453	NM_001101800	ENSG00000031003	FAM13B	FAM13B	ARHGAP49|C5orf5|FAM13B1|KHCHP|N61	family with sequence similarity 13, member B	protein-coding	4.8	0.833	10	9	1.8	5.09	9.58e-05	6.15	2.28e-05	0.97
chr4-355	chr4	152331898	152332038	+	4.8	0.692	intron (NM_001109977, intron 1 of 13)	intron (NM_001109977, intron 1 of 13)	1570	1570	NM_001109977	729830	Hs.633810	NM_001109977	ENSG00000164142	FAM160A1	FAM160A1	-	family with sequence similarity 160, member A1	protein-coding	4.8	0.692	9	9	1.8	5.09	9.58e-05	7.92	3.14e-06	0.97
chr11-316	chr11	73288845	73288985	+	4.8	0.667	intron (NM_015159, intron 1 of 7)	intron (NM_015159, intron 1 of 7)	20313	20313	NM_015159	23201	Hs.475334	NM_015159	ENSG00000054965	FAM168A	FAM168A	KIAA0280|TCRP1	family with sequence similarity 168, member A	protein-coding	4.8	0.667	9	9	1.8	5.09	9.58e-05	6.82	1.03e-05	0.97
chr5-69	chr5	10203962	10204102	+	6.9	0.737	Intergenic	Intergenic	45989	45989	NR_047669	134145	Hs.481569	NM_001258388	ENSG00000150756	FAM173B	FAM173B	JS-2	family with sequence similarity 173, member B	protein-coding	6.9	0.737	14	13	2.7	4.9	4.48e-06	4.95	4.04e-06	0.96
chr5-6929	chr5	99928579	99928719	+	4.8	0.769	Intergenic	Intergenic	57525	57525	NM_198507	345757	Hs.741358	NM_198507	ENSG00000174132	FAM174A	FAM174A	TMEM157|UNQ1912	family with sequence similarity 174, member A	protein-coding	4.8	0.769	9	9	1.8	5.09	9.58e-05	8.8	1.35e-06	0.97
chr4-108	chr4	84406460	84406600	+	5.3	0.917	promoter-TSS (NM_139076)	promoter-TSS (NM_139076)	-240	240	NM_139076	84142	Hs.334772	NM_139076	ENSG00000163322	FAM175A	FAM175A	ABRA1|CCDC98	family with sequence similarity 175, member A	protein-coding	5.3	0.917	10	10	1.8	5.66	1.66e-05	10.06	9.6e-08	0.97
chr21-50	chr21	33783156	33783296	+	5.3	0.667	Intergenic	L1M3|LINE|L1	-1526	1526	NM_058187	59271	Hs.208358	NM_058187	ENSG00000166979	FAM176C	FAM176C	B18|B19|C21orf63|C21orf64|EVA-1|EVA1|SUE21	family with sequence similarity 176, member C	protein-coding	5.3	0.667	10	10	1.8	5.66	1.66e-05	7.57	1.35e-06	0.97
chr14-703	chr14	35501301	35501441	+	4.8	0.917	Intergenic	Intergenic	-12742	12742	NM_001079519	283635	Hs.446357	NM_001079519	ENSG00000151327	FAM177A1	FAM177A1	C14orf24	family with sequence similarity 177, member A1	protein-coding	4.8	0.917	9	9	1.8	5.09	9.58e-05	9.32	7.65e-07	0.97
chr14-337	chr14	45479459	45479599	+	5.3	0.714	intron (NM_015091, intron 6 of 18)	intron (NM_015091, intron 6 of 18)	48113	48113	NM_015091	23116	Hs.371078	NM_015091	ENSG00000198718	FAM179B	FAM179B	KIAA0423	family with sequence similarity 179, member B	protein-coding	5.3	0.714	10	10	2	5.03	4.45e-05	6.34	6.28e-06	0.97
chr14-40	chr14	94407131	94407273	+	7	0.72	intron (NM_016150, intron 5 of 7)	MIR|SINE|MIR	13471	13471	NM_001207072	90050	Hs.525550	NM_001207071	ENSG00000140067	FAM181A	FAM181A	C14orf152	family with sequence similarity 181, member A	protein-coding	7	0.72	15	15	2	7.41	4.5e-09	8.4	8.66e-10	0.95
chr11-308	chr11	82486732	82486874	+	4.7	0.786	Intergenic	L1M1|LINE|L1	-41897	41897	NM_175885	220382	Hs.448218	NM_175885	ENSG00000182103	FAM181B	FAM181B	-	family with sequence similarity 181, member B	protein-coding	4.7	0.786	10	10	2	4.94	5.11e-05	4.57	9.71e-05	0.97
chr1-360	chr1	43539275	43539417	+	4.7	0.769	Intergenic	Intergenic	-74248	74248	NM_001101376	440585	Hs.657614	NM_001101376	ENSG00000186973	FAM183A	FAM183A	-	family with sequence similarity 183, member A	protein-coding	4.7	0.769	10	10	2	4.94	5.11e-05	6.87	3.14e-06	0.97
chr7-92	chr7	38836786	38836928	+	5.1	0.786	intron (NM_080631, intron 6 of 27)	intron (NM_080631, intron 6 of 27)	-110168	110168	NR_028347	340286	Hs.144075	NM_001105282		FAM183B	FAM183B	-	acyloxyacyl hydrolase (neutrophil)	pseudo	5.1	0.786	11	11	2	5.44	9.23e-06	10.87	1.13e-08	0.97
chr4-110	chr4	91007465	91007607	+	4.7	0.706	Intergenic	MIRb|SINE|MIR	-41148	41148	NM_001145065	401145	Hs.654735	NM_001145065	ENSG00000184305	FAM190A	FAM190A	-	family with sequence similarity 190, member A	protein-coding	4.7	0.706	11	10	2	4.94	5.11e-05	8.47	5e-07	0.97
chr16-327	chr16	57201669	57201809	+	4.8	0.667	intron (NM_024946, intron 4 of 6)	U2|snRNA|snRNA	18237	18237	NM_024946	80011	Hs.396740	NM_024946	ENSG00000172775	FAM192A	FAM192A	C16orf94|CDA018|NIP30	family with sequence similarity 192, member A	protein-coding	4.8	0.667	9	9	1.8	5.09	9.58e-05	5.56	4.95e-05	0.97
chr5-1807	chr5	176981971	176982113	+	5.1	0.722	promoter-TSS (NR_024019)	promoter-TSS (NR_024019)	-494	494	NM_001190946	54540	Hs.484289	NM_019057	ENSG00000146067	FAM193B	FAM193B	IRIZIO	family with sequence similarity 193, member B	protein-coding	5.1	0.722	12	11	2	5.44	9.23e-06	5.27	1.24e-05	0.97
chr5-6838	chr5	169415794	169415936	+	4.7	0.846	intron (NM_004946, intron 29 of 51)	intron (NM_004946, intron 29 of 51)	-8121	8121	NM_001129891	100131897	Hs.721917	NM_001129891	ENSG00000204767	FAM196B	FAM196B	C5orf57	family with sequence similarity 196, member B	protein-coding	4.7	0.846	10	10	2	4.94	5.11e-05	6.25	7.1e-06	0.97
chr4-73	chr4	159016622	159016762	+	5.3	0.765	Intergenic	Intergenic	77026	77026	NM_016613	51313	Hs.567498	NM_001031700	ENSG00000164125	FAM198B	FAM198B	AD036|C4orf18	family with sequence similarity 198, member B	protein-coding	5.3	0.765	11	10	1.8	5.66	1.66e-05	9.15	2.5e-07	0.97
chr9-313	chr9	34744619	34744759	+	4.8	0.692	Intergenic	Intergenic	-15154	15154	NM_001141917	259308	Hs.522093	NM_001141917	ENSG00000205108	FAM205A	FAM205A	C9orf144B	family with sequence similarity 205, member A	protein-coding	4.8	0.692	9	9	1.8	5.09	9.58e-05	6.89	9.49e-06	0.97
chr9-314	chr9	34877888	34878028	+	4.8	0.75	Intergenic	L1MC1|LINE|L1	-39375	39375	NR_024481	389715	Hs.725618	NM_001126494		FAM205B	FAM205B	C9orf144	transmembrane protein C9orf144B pseudogene	pseudo	4.8	0.75	9	9	1.8	5.09	9.58e-05	10.18	3.74e-07	0.97
chr13-73	chr13	43359265	43359405	+	4.8	0.833	intron (NM_182508, intron 2 of 3)	LTR90B|LTR|LTR	3649	3649	NM_182508	144809	Hs.16970	NM_182508	ENSG00000179813	FAM216B	FAM216B	C13orf30	family with sequence similarity 216, member B	protein-coding	4.8	0.833	9	9	1.8	5.09	9.58e-05	8.13	2.56e-06	0.97
chr17-96	chr17	27134318	27134458	+	4.8	0.769	intron (NM_001077498, intron 1 of 2)	intron (NM_001077498, intron 1 of 2)	35453	35453	NM_001077498	55731	Hs.564533	NM_001077498	ENSG00000173065	FAM222B	FAM222B	C17orf63	family with sequence similarity 222, member B	protein-coding	4.8	0.769	10	9	1.8	5.09	9.58e-05	5.24	7.76e-05	0.97
chr6-72	chr6	82097035	82097177	+	5.1	0.857	Intergenic	Intergenic	365322	365322	NM_017633	55603	Hs.10784	NM_017633	ENSG00000112773	FAM46A	FAM46A	C6orf37|XTP11	family with sequence similarity 46, member A	protein-coding	5.1	0.857	12	11	2.4	4.55	4.58e-05	9.55	4.16e-08	0.97
chr8-1226	chr8	130943410	130943552	+	4.7	0.611	intron (NR_046360, intron 2 of 14)	intron (NR_046360, intron 2 of 14)	8637	8637	NM_001256763	51571	Hs.126941	NM_001256763	ENSG00000153310	FAM49B	FAM49B	L1	family with sequence similarity 49, member B	protein-coding	4.7	0.611	10	10	2	4.94	5.11e-05	7.23	2.02e-06	0.97
chr1-484	chr1	190249203	190249345	+	4.7	0.786	intron (NM_199051, intron 3 of 7)	L2a|LINE|L2	197485	197485	NM_199051	339479	Hs.65765	NM_199051	ENSG00000162670	FAM5C	FAM5C	BRINP3|DBCCR1L|DBCCR1L1	family with sequence similarity 5, member C	protein-coding	4.7	0.786	10	10	2	4.94	5.11e-05	7.31	1.84e-06	0.97
chr6-215	chr6	24856185	24856325	+	4.8	0.818	intron (NM_015864, intron 8 of 13)	AluJo|SINE|Alu	21328	21328	NM_015864	9750	Hs.559459	NM_014722	ENSG00000111913	FAM65B	FAM65B	C6orf32|DIFF40|DIFF48|PL48	family with sequence similarity 65, member B	protein-coding	4.8	0.818	9	9	1.8	5.09	9.58e-05	7.92	3.14e-06	0.97
chr20-312	chr20	49262403	49262545	+	5.1	0.722	Intergenic	Intergenic	-9048	9048	NM_080829	140876	Hs.372578	NM_080829	ENSG00000042062	FAM65C	FAM65C	C20orf175|C20orf176|dJ530I15.2|dJ530I15.3	family with sequence similarity 65, member C	protein-coding	5.1	0.722	11	11	2	5.44	9.23e-06	5.38	1.02e-05	0.97
chr1-398	chr1	93348039	93348181	+	4.7	0.769	intron (NM_001252270, intron 1 of 3)	L1ME3B|LINE|L1	-5403	5403	NM_001252271	388650	Hs.180946	NM_001006605	ENSG00000154511	FAM69A	FAM69A	-	family with sequence similarity 69, member A	protein-coding	4.7	0.769	10	10	2	4.94	5.11e-05	8.36	5.57e-07	0.97
chr2-122	chr2	38143674	38143816	+	4.7	0.917	Intergenic	MIRc|SINE|MIR	-8717	8717	NM_001170791	151393	Hs.591566	NM_001170791	ENSG00000115841	FAM82A1	FAM82A1	FAM82A|PRO34163|PYST9371|RMD-2|RMD2|RMD4	family with sequence similarity 82, member A1	protein-coding	4.7	0.917	11	10	2	4.94	5.11e-05	7.01	2.64e-06	0.97
chr8-79	chr8	124194106	124194248	+	6.1	0.762	promoter-TSS (NM_032899)	promoter-TSS (NM_032899)	-575	575	NM_207006	84985	Hs.379821	NM_032899	ENSG00000147689	FAM83A	FAM83A	BJ-TSA-9	family with sequence similarity 83, member A	protein-coding	6.1	0.762	13	13	2.4	5.38	1.66e-06	4.12	2.7e-05	0.96
chr20-27	chr20	33894458	33894598	+	6.9	0.762	exon (NM_001184977, exon 7 of 8)	exon (NM_001184977, exon 7 of 8)	-14303	14303	NM_178468	128876	Hs.592149	NM_178468	ENSG00000125998	FAM83C	FAM83C	C20orf128|dJ614O4.7	family with sequence similarity 83, member C	protein-coding	6.9	0.762	13	13	2	6.53	1.96e-07	4.24	2.02e-05	0.96
chr8-86	chr8	127567633	127567773	+	6.3	0.667	3' UTR (NM_174911, exon 2 of 2)	3' UTR (NM_174911, exon 2 of 2)	3008	3008	NM_174911	157638	Hs.124951	NM_174911	ENSG00000168672	FAM84B	FAM84B	BCMP101|NSE2	family with sequence similarity 84, member B	protein-coding	6.3	0.667	12	12	2.7	4.52	2.23e-05	4.42	2.76e-05	0.96
chr15-22	chr15	38765418	38765558	+	5.3	0.688	intron (NM_001042429, intron 4 of 6)	intron (NM_001042429, intron 4 of 6)	19160	19160	NM_001042429	283742	Hs.741224	NM_001042429	ENSG00000171262	FAM98B	FAM98B	-	family with sequence similarity 98, member B	protein-coding	5.3	0.688	11	10	1.8	5.66	1.66e-05	7.66	1.22e-06	0.97
chr2-273	chr2	58436104	58436244	+	4.8	0.769	intron (NM_001114636, intron 5 of 13)	intron (NM_001114636, intron 5 of 13)	32341	32341	NM_001114636	55120	Hs.741421	NM_001114636	ENSG00000115392	FANCL	FANCL	FAAP43|PHF9|POG	Fanconi anemia, complementation group L	protein-coding	4.8	0.769	9	9	1.8	5.09	9.58e-05	7.37	5.58e-06	0.97
chr12-28	chr12	29171989	29172131	+	4.7	0.786	Intergenic	Intergenic	-204538	204538	NM_018099	55711	Hs.741332	NM_018099	ENSG00000064763	FAR2	FAR2	MLSTD1|SDR10E2	fatty acyl CoA reductase 2	protein-coding	4.7	0.786	11	10	2	4.94	5.11e-05	8.47	5e-07	0.97
chr2-592	chr2	242368684	242368824	+	4.8	0.75	intron (NM_014808, intron 8 of 26)	L1MC4|LINE|L1	73090	73090	NM_014808	9855	Hs.726316	NM_014808	ENSG00000006607	FARP2	FARP2	FIR|FRG|PLEKHC3	FERM, RhoGEF and pleckstrin domain protein 2	protein-coding	4.8	0.75	9	9	1.8	5.09	9.58e-05	10.18	3.74e-07	0.97
chr1-541	chr1	172607762	172607902	+	4.8	0.818	Intergenic	L2c|LINE|L2	-20353	20353	NM_000639	356	Hs.2007	NM_000639	ENSG00000117560	FASLG	FASLG	ALPS1B|APT1LG1|CD178|CD95-L|CD95L|FASL|TNFSF6	Fas ligand (TNF superfamily, member 6)	protein-coding	4.8	0.818	9	9	1.8	5.09	9.58e-05	6.15	2.28e-05	0.97
chr5-152	chr5	7865174	7865314	+	6.3	0.667	intron (NM_024091, intron 3 of 6)	L1MC4a|LINE|L1	3906	3906	NR_036553	79072	Hs.653162	NM_024091	ENSG00000124279	FASTKD3	FASTKD3	-	FAST kinase domains 3	protein-coding	6.3	0.667	13	12	2.7	4.52	2.23e-05	4.04	6.45e-05	0.96
chr4-449	chr4	187593046	187593186	+	4.8	0.714	intron (NM_005245, intron 2 of 26)	intron (NM_005245, intron 2 of 26)	51871	51871	NM_005245	2195	Hs.481371	NM_005245	ENSG00000083857	FAT1	FAT1	CDHF7|CDHR8|FAT|ME5|hFat1	FAT tumor suppressor homolog 1 (Drosophila)	protein-coding	4.8	0.714	9	9	1.8	5.09	9.58e-05	5.07	9.89e-05	0.97
chr5-1796	chr5	150996269	150996411	+	5.6	0.7	Intergenic	Intergenic	-47835	47835	NM_001447	2196	Hs.591255	NM_001447	ENSG00000086570	FAT2	FAT2	CDHF8|CDHR9|HFAT2|MEGF1	FAT tumor suppressor homolog 2 (Drosophila)	protein-coding	5.6	0.7	12	12	2	5.93	1.53e-06	3.86	0.0001	0.96
chr11-381	chr11	91588951	91589091	+	4.8	0.769	Intergenic	L2a|LINE|L2	-496241	496241	NM_001008781	120114	Hs.98523	NM_001008781	ENSG00000165323	FAT3	FAT3	CDHF15|CDHR10	FAT tumor suppressor homolog 3 (Drosophila)	protein-coding	4.8	0.769	9	9	1.8	5.09	9.58e-05	8.57	1.68e-06	0.97
chr15-83	chr15	48959392	48959534	+	4.7	0.714	Intergenic	L1ME4a|LINE|L1	-21478	21478	NM_000138	2200	Hs.591133	NM_000138	ENSG00000166147	FBN1	FBN1	ACMICD|ECTOL1|FBN|GPHYSD2|MASS|MFS1|OCTD|SGS|SSKS|WMS|WMS2	fibrillin 1	protein-coding	4.7	0.714	10	10	2	4.94	5.11e-05	8.07	7.65e-07	0.97
chr5-6941	chr5	107681331	107681471	+	4.8	0.75	intron (NM_001163315, intron 4 of 8)	intron (NM_001163315, intron 4 of 8)	36398	36398	NM_001163315	64839	Hs.657225	NM_022824	ENSG00000145743	FBXL17	FBXL17	FBXO13|Fbl17|Fbx13	F-box and leucine-rich repeat protein 17	protein-coding	4.8	0.75	9	9	1.8	5.09	9.58e-05	6.04	2.65e-05	0.97
chr17-318	chr17	37561591	37561733	+	4.7	0.688	3' UTR (NM_004774, exon 17 of 17)	3' UTR (NM_004774, exon 17 of 17)	-3753	3753	NM_032875	84961	Hs.462946	NM_001184906	ENSG00000108306	FBXL20	FBXL20	Fbl2|Fbl20	F-box and leucine-rich repeat protein 20	protein-coding	4.7	0.688	10	10	2	4.94	5.11e-05	5.55	1.94e-05	0.97
chr15-118	chr15	63869130	63869270	+	4.8	0.8	intron (NM_001256702, intron 10 of 13)	intron (NM_001256702, intron 10 of 13)	-20352	20352	NM_203373	283807	Hs.656997	NM_203373	ENSG00000197361	FBXL22	FBXL22	Fbl22	F-box and leucine-rich repeat protein 22	protein-coding	4.8	0.8	9	9	1.8	5.09	9.58e-05	6.4	1.68e-05	0.97
chr4-92	chr4	15631632	15631774	+	4.7	0.786	intron (NM_012161, intron 6 of 10)	L2c|LINE|L2	25332	25332	NR_036464	26234	Hs.714386	NM_001193534	ENSG00000118564	FBXL5	FBXL5	FBL4|FBL5|FLR1	F-box and leucine-rich repeat protein 5	protein-coding	4.7	0.786	11	10	2	4.94	5.11e-05	9.89	1.24e-07	0.97
chr5-2292	chr5	15449750	15449892	+	5.1	0.737	Intergenic	Intergenic	-50484	50484	NM_012304	23194	Hs.433057	NM_012304	ENSG00000183580	FBXL7	FBXL7	FBL6|FBL7	F-box and leucine-rich repeat protein 7	protein-coding	5.1	0.737	11	11	2	5.44	9.23e-06	5.53	7.85e-06	0.97
chr1-30	chr1	224301483	224301623	+	6.9	0.722	promoter-TSS (NM_015176)	promoter-TSS (NM_015176)	-236	236	NR_049764	23219	Hs.64691	NM_001136115	ENSG00000143756	FBXO28	FBXO28	CENP-30|Fbx28	F-box protein 28	protein-coding	6.9	0.722	13	13	2	6.53	1.96e-07	7.04	8.42e-08	0.96
chr8-15	chr8	124555485	124555627	+	6.6	0.882	Intergenic	MLT1H2|LTR|ERVL-MaLR	-2063	2063	NM_001242463	114907	Hs.403933	NM_001242463	ENSG00000156804	FBXO32	FBXO32	Fbx32|MAFbx	F-box protein 32	protein-coding	6.6	0.882	15	14	2.4	5.79	2.83e-07	4.52	4.86e-06	0.96
chr14-89	chr14	39900532	39900674	+	6.1	0.824	intron (NM_203301, intron 1 of 3)	intron (NM_203301, intron 1 of 3)	1101	1101	NM_203301	254170	Hs.146632	NM_203301	ENSG00000165355	FBXO33	FBXO33	BMND12|Fbx33|c14_5247	F-box protein 33	protein-coding	6.1	0.824	13	13	2	6.43	2.36e-07	6.02	4.89e-07	0.96
chr5-1753	chr5	41927414	41927556	+	5.6	0.722	intron (NM_012176, intron 2 of 6)	MIR3|SINE|MIR	2129	2129	NM_033484	26272	Hs.165575	NM_012176	ENSG00000151876	FBXO4	FBXO4	FBX4	F-box protein 4	protein-coding	5.6	0.722	12	12	2.4	4.96	9.07e-06	4.12	5.37e-05	0.96
chr19-32	chr19	46219972	46220112	+	4.8	0.611	intron (NM_001080469, intron 1 of 1)	MIR|SINE|MIR	14109	14109	NM_001080469	23403	Hs.128702	NM_001080469	ENSG00000177051	FBXO46	FBXO46	20D7-FC4|FBXO34L|Fbx46	F-box protein 46	protein-coding	4.8	0.611	10	9	1.8	5.09	9.58e-05	8.13	2.56e-06	0.97
chr17-274	chr17	37128845	37128985	+	4.8	0.688	Intergenic	Intergenic	-5260	5260	NM_001008777	494188	Hs.549536	NM_001008777	ENSG00000204952	FBXO47	FBXO47	-	F-box protein 47	protein-coding	4.8	0.688	9	9	1.8	5.09	9.58e-05	9.75	5.32e-07	0.97
chr6-246	chr6	52931153	52931293	+	4.8	0.818	intron (NM_033480, intron 1 of 12)	intron (NM_033480, intron 1 of 12)	966	966	NM_033480	26268	Hs.216653	NM_012347	ENSG00000112146	FBXO9	FBXO9	FBX9|NY-REN-57|VCIA1|dJ341E18.2	F-box protein 9	protein-coding	4.8	0.818	9	9	1.8	5.09	9.58e-05	6.21	2.12e-05	0.97
chr5-1802	chr5	171184396	171184538	+	5.1	0.75	Intergenic	L1M5|LINE|L1	249410	249410	NM_012300	23291	Hs.484138	NM_012300	ENSG00000072803	FBXW11	FBXW11	BTRC2|BTRCP2|FBW1B|FBXW1B|Fbw11|Hos	F-box and WD repeat domain containing 11	protein-coding	5.1	0.75	12	11	2	5.44	9.23e-06	5.57	7.35e-06	0.97
chr9-508	chr9	139830881	139831021	+	4.8	0.769	Intergenic	Intergenic	8255	8255	NM_018998	54461	Hs.522507	NM_018998	ENSG00000159069	FBXW5	FBXW5	Fbw5	F-box and WD repeat domain containing 5	protein-coding	4.8	0.769	9	9	1.8	5.09	9.58e-05	6.4	1.68e-05	0.97
chr4-359	chr4	153277653	153277793	+	4.8	0.692	intron (NM_033632, intron 2 of 11)	intron (NM_033632, intron 2 of 11)	-3613	3613	NM_018315	55294	Hs.717081	NM_001013415	ENSG00000109670	FBXW7	FBXW7	AGO|CDC4|FBW6|FBW7|FBX30|FBXO30|FBXW6|SEL-10|SEL10|hAgo|hCdc4	F-box and WD repeat domain containing 7, E3 ubiquitin protein ligase	protein-coding	4.8	0.692	9	9	1.8	5.09	9.58e-05	5.37	6.43e-05	0.97
chr1-529	chr1	207158638	207158780	+	4.7	0.647	Intergenic	Intergenic	-14739	14739	NM_001122979	83953	Hs.145519	NM_001122980	ENSG00000162897	FCAMR	FCAMR	CD351|FCA/MR	Fc receptor, IgA, IgM, high affinity	protein-coding	4.7	0.647	10	10	2	4.94	5.11e-05	4.89	5.59e-05	0.97
chr11-127	chr11	72799736	72799876	+	5.3	0.55	intron (NM_014824, intron 2 of 19)	intron (NM_014824, intron 2 of 19)	53337	53337	NM_014824	9873	Hs.577053	NM_014824	ENSG00000137478	FCHSD2	FCHSD2	NWK|SH3MD3	FCH and double SH3 domains 2	protein-coding	5.3	0.55	10	10	1.8	5.66	1.66e-05	6.18	7.89e-06	0.97
chr15-123	chr15	68588005	68588145	+	4.8	0.786	Intergenic	Intergenic	17934	17934	NM_015322	10116	Hs.362733	NM_015322	ENSG00000169018	FEM1B	FEM1B	F1A-ALPHA|FIAA	fem-1 homolog b (C. elegans)	protein-coding	4.8	0.786	9	9	1.8	5.09	9.58e-05	8.45	1.87e-06	0.97
chr5-3528	chr5	114795912	114796054	+	5.1	0.867	Intergenic	Intergenic	84608	84608	NM_020177	56929	Hs.47367	NM_020177	ENSG00000145780	FEM1C	FEM1C	EUROIMAGE686608|EUROIMAGE783647|FEM1A	fem-1 homolog c (C. elegans)	protein-coding	5.1	0.867	11	11	2	5.44	9.23e-06	6.82	1.11e-06	0.97
chr11-201	chr11	61566044	61566186	+	4.7	0.667	TTS (NM_013402)	TTS (NM_013402)	6006	6006	NM_004111	2237	Hs.741166	NM_004111	ENSG00000168496	FEN1	FEN1	FEN-1|MF1|RAD2	flap structure-specific endonuclease 1	protein-coding	4.7	0.667	10	10	2	4.94	5.11e-05	5.98	1.03e-05	0.97
chr5-6943	chr5	108238123	108238263	+	4.8	0.833	intron (NM_005246, intron 10 of 19)	MER103C|DNA|hAT-Charlie	154670	154670	NM_005246	2241	Hs.221472	NM_005246	ENSG00000151422	FER	FER	FerT|PPP1R74|TYK3	fer (fps/fes related) tyrosine kinase	protein-coding	4.8	0.833	9	9	1.8	5.09	9.58e-05	7.73	3.82e-06	0.97
chr8-89	chr8	124851976	124852118	+	6.1	0.773	Intergenic	Intergenic	-12180	12180	NM_001039112	654463	Hs.632058	NM_001039112	ENSG00000214814	FER1L6	FER1L6	C8ORFK23	fer-1-like 6 (C. elegans)	protein-coding	6.1	0.773	13	13	2	6.43	2.36e-07	4.96	3.96e-06	0.96
chr8-485	chr8	125070649	125070789	+	5.3	0.733	intron (NM_001039112, intron 22 of 40)	intron (NM_001039112, intron 22 of 40)	-17696	17696	NR_040044	439941	Hs.683919	NM_001038706		FER1L6-AS1	FER1L6-AS1	C8orf54	FER1L6 antisense RNA 1	miscRNA	5.3	0.733	10	10	1.8	5.66	1.66e-05	5.82	1.31e-05	0.97
chr14-488	chr14	53497985	53498125	+	5.3	0.714	Intergenic	L1MC4a|LINE|L1	-80240	80240	NM_006832	10979	Hs.509343	NM_001134999	ENSG00000073712	FERMT2	FERMT2	KIND2|MIG2|PLEKHC1|UNC112|UNC112B|mig-2	fermitin family member 2	protein-coding	5.3	0.714	10	10	1.8	5.66	1.66e-05	5.59	1.84e-05	0.97
chr5-1773	chr5	44333741	44333883	+	5.1	0.722	intron (NM_004465, intron 1 of 2)	intron (NM_004465, intron 1 of 2)	54972	54972	NM_004465	2255	Hs.664499	NM_004465	ENSG00000070193	FGF10	FGF10	-	fibroblast growth factor 10	protein-coding	5.1	0.722	12	11	2	5.44	9.23e-06	4.44	5.7e-05	0.97
chrX-229	chrX	138196666	138196808	+	4.7	0.769	intron (NM_001139501, intron 2 of 7)	MIRb|SINE|MIR	90448	90448	NM_001139498	2258	Hs.6540	NM_001139498	ENSG00000129682	FGF13	FGF13	FGF-13|FGF2|FHF-2|FHF2	fibroblast growth factor 13	protein-coding	4.7	0.769	10	10	2	4.94	5.11e-05	7.8	1.04e-06	0.97
chr4-124	chr4	123785726	123785866	+	5.3	0.786	intron (NM_002006, intron 1 of 2)	intron (NM_002006, intron 1 of 2)	37933	37933	NM_002006	2247	Hs.284244	NM_002006	ENSG00000138685	FGF2	FGF2	BFGF|FGF-2|FGFB|HBGF-2	fibroblast growth factor 2 (basic)	protein-coding	5.3	0.786	10	10	1.8	5.66	1.66e-05	8.38	5.46e-07	0.97
chr4-94	chr4	15938521	15938663	+	5.1	0.846	intron (NM_005130, intron 2 of 2)	L2b|LINE|L2	1771	1771	NM_005130	9982	Hs.1690	NM_005130	ENSG00000137440	FGFBP1	FGFBP1	FGF-BP|FGF-BP1|FGFBP|FGFBP-1|HBP17	fibroblast growth factor binding protein 1	protein-coding	5.1	0.846	11	11	2	5.44	9.23e-06	7.64	3.73e-07	0.97
chr1-30	chr1	241645967	241646109	+	6.1	0.81	Intergenic	Intergenic	37047	37047	NM_000143	2271	Hs.592490	NM_000143	ENSG00000091483	FH	FH	HLRCC|LRCC|MCL|MCUL1	fumarate hydratase	protein-coding	6.1	0.81	14	13	2	6.43	2.36e-07	5.9	6.07e-07	0.96
chr2-360	chr2	106051070	106051210	+	4.8	0.9	intron (NM_201557, intron 1 of 5)	MIR|SINE|MIR	4090	4090	NM_201557	2274	Hs.443687	NM_001039492	ENSG00000115641	FHL2	FHL2	AAG11|DRAL|FHL-2|SLIM-3|SLIM3	four and a half LIM domains 2	protein-coding	4.8	0.9	9	9	1.8	5.09	9.58e-05	6.67	1.22e-05	0.97
chr3-4	chr3	99621606	99621748	+	7	0.615	intron (NR_031662, intron 1 of 4)	intron (NR_031662, intron 1 of 4)	-26631	26631	NM_014890	11259	Hs.104672	NM_001042459	ENSG00000168386	FILIP1L	FILIP1L	DOC-1|DOC1|GIP130|GIP130a|GIP130b|GIP130c|GIP90	filamin A interacting protein 1-like	protein-coding	7	0.615	15	15	3.2	4.65	1.6e-06	5.69	1.35e-07	0.95
chr9-65	chr9	115977392	115977532	+	5.3	0.8	intron (NM_015258, intron 1 of 27)	Tigger1|DNA|TcMar-Tigger	6179	6179	NM_015258	23307	Hs.522351	NM_015258	ENSG00000119321	FKBP15	FKBP15	FKBP133|KIAA0674|PPP1R76	FK506 binding protein 15, 133kDa	protein-coding	5.3	0.8	11	10	1.8	5.66	1.66e-05	8.69	3.94e-07	0.97
chr6-200	chr6	35694095	35694237	+	4.7	0.769	TTS (NR_027117)	TTS (NR_027117)	2194	2194	NM_001145775	2289	Hs.407190	NM_001145775	ENSG00000096060	FKBP5	FKBP5	AIG6|FKBP51|FKBP54|P54|PPIase|Ptg-10	FK506 binding protein 5	protein-coding	4.7	0.769	10	10	2	4.94	5.11e-05	9.38	1.99e-07	0.97
chr7-243	chr7	55712110	55712250	+	4.8	0.9	Intergenic	Intergenic	43545	43545	NR_027340	360132	Hs.446691	NM_182827		FKBP9L	FKBP9L	-	FK506 binding protein 9-like	pseudo	4.8	0.9	9	9	1.8	5.09	9.58e-05	10.18	3.74e-07	0.97
chr5-6854	chr5	174378163	174378305	+	4.7	0.769	intron (NR_046113, intron 2 of 2)	intron (NR_046113, intron 2 of 2)	44500	44500	NR_046113	441116	Hs.533036	NM_001004348		FLJ16171	FLJ16171	-	FLJ16171 protein	miscRNA	4.7	0.769	10	10	2	4.94	5.11e-05	6.37	6.08e-06	0.97
chr14-651	chr14	62076857	62076999	+	5.1	0.737	intron (NR_039985, intron 1 of 2)	Zaphod3|DNA|hAT-Tip100	39670	39670	NR_039985	400221	Hs.344000	NR_039985		FLJ22447	FLJ22447	-	uncharacterized LOC400221	miscRNA	5.1	0.737	11	11	2.4	4.55	4.58e-05	4.34	6.96e-05	0.97
chr3-247	chr3	109955368	109955510	+	4.7	0.833	Intergenic	Intergenic	826602	826602	NM_001145553	401082	Hs.477089	NM_001145553		FLJ25363	FLJ25363	-	uncharacterized LOC401082	protein-coding	4.7	0.833	10	10	2	4.94	5.11e-05	9.78	1.37e-07	0.97
chr1-446	chr1	90064893	90065033	+	4.8	0.833	Intergenic	Intergenic	33490	33490	NR_033981	400761	Hs.741594	NR_033981		FLJ27354	FLJ27354	-	uncharacterized LOC400761	miscRNA	4.8	0.833	9	9	1.8	5.09	9.58e-05	8.02	2.84e-06	0.97
chr5-782	chr5	6294186	6294326	+	5.8	0.765	Intergenic	L1PA17|LINE|L1	43149	43149	NR_028351	401172	Hs.376760	NM_001001702		FLJ33360	FLJ33360	-	FLJ33360 protein	miscRNA	5.8	0.765	11	11	2	5.53	7.92e-06	4.17	9.93e-05	0.97
chr9-43	chr9	140603408	140603550	+	6.1	0.737	intron (NM_001145527, intron 1 of 15)	Charlie1|DNA|hAT-Charlie	-53995	53995	NR_024341	643210	Hs.721002	NM_001039765		FLJ40292	FLJ40292	-	uncharacterized LOC643210	miscRNA	6.1	0.737	13	13	2	6.43	2.36e-07	10.37	9.47e-10	0.96
chr9-259	chr9	13452242	13452384	+	4.7	0.846	Intergenic	Intergenic	-20985	20985	NR_033863	401492	Hs.632651	NR_033863		FLJ41200	FLJ41200	-	uncharacterized LOC401492	miscRNA	4.7	0.846	10	10	2	4.94	5.11e-05	5.88	1.2e-05	0.97
chr7-175	chr7	96055842	96055982	+	4.8	0.833	Intergenic	Intergenic	76923	76923	NM_001201450	401388	Hs.734935	NM_207503	ENSG00000197851	FLJ42280	FLJ42280	-	putative uncharacterized protein FLJ42280	protein-coding	4.8	0.833	10	9	1.8	5.09	9.58e-05	6.89	9.49e-06	0.97
chr2-158	chr2	113374914	113375056	+	5.1	0.857	Intergenic	Intergenic	26772	26772	NR_033871	400999	Hs.635980	NR_033871		FLJ42351	FLJ42351	-	uncharacterized LOC400999	miscRNA	5.1	0.857	11	11	2	5.44	9.23e-06	8.04	2.26e-07	0.97
chr5-6918	chr5	92604681	92604821	+	4.8	0.818	Intergenic	L2a|LINE|L2	301748	301748	NR_015369	441094	Hs.457407	NR_015369		FLJ42709	FLJ42709	-	uncharacterized LOC441094	miscRNA	4.8	0.818	9	9	1.8	5.09	9.58e-05	10.18	3.74e-07	0.97
chr8-628	chr8	102047590	102047732	+	4.7	0.833	Intergenic	LTR33A|LTR|ERVL	-16621	16621	NR_033962	441374	Hs.652045	NR_033962		FLJ42969	FLJ42969	-	uncharacterized LOC441374	miscRNA	4.7	0.833	10	10	2	4.94	5.11e-05	7.8	1.04e-06	0.97
chr7-191	chr7	130793536	130793676	+	4.8	0.833	promoter-TSS (NR_015431)	promoter-TSS (NR_015431)	-44	44	NR_015431	378805	Hs.732223	NM_001085379		FLJ43663	FLJ43663	-	uncharacterized LOC378805	miscRNA	4.8	0.833	10	9	1.8	5.09	9.58e-05	6.28	1.96e-05	0.97
chr7-47	chr7	53520896	53521038	+	5.6	0.812	Intergenic	Intergenic	358657	358657	NR_038371	401337	Hs.531378	NM_001001707		FLJ45974	FLJ45974	-	uncharacterized LOC401337	miscRNA	5.6	0.812	12	12	2.4	4.96	9.07e-06	9.69	8.73e-09	0.96
chr3-5	chr3	57997287	57997429	+	6.6	0.818	intron (NM_001164317, intron 1 of 46)	intron (NM_001164317, intron 1 of 46)	3231	3231	NM_001164317	2317	Hs.476448	NM_001164317	ENSG00000136068	FLNB	FLNB	ABP-278|ABP-280|AOI|FH1|FLN-B|FLN1L|LRS1|SCT|TABP|TAP	filamin B, beta	protein-coding	6.6	0.818	14	14	2.4	5.79	2.83e-07	5.31	7.78e-07	0.96
chr14-635	chr14	85964525	85964665	+	5.3	0.909	Intergenic	Intergenic	-31893	31893	NM_013231	23768	Hs.731808	NM_013231	ENSG00000185070	FLRT2	FLRT2	-	fibronectin leucine rich transmembrane protein 2	protein-coding	5.3	0.909	10	10	1.8	5.66	1.66e-05	9.03	2.81e-07	0.97
chr1-344	chr1	240299510	240299650	+	5.3	0.714	intron (NM_020066, intron 2 of 17)	intron (NM_020066, intron 2 of 17)	44395	44395	NM_020066	56776	Hs.24889	NM_020066	ENSG00000155816	FMN2	FMN2	-	formin 2	protein-coding	5.3	0.714	10	10	2	5.03	4.45e-05	9.52	1.75e-07	0.97
chr2-365	chr2	153322060	153322202	+	4.7	0.769	intron (NM_052905, intron 1 of 25)	intron (NM_052905, intron 1 of 25)	130380	130380	NM_052905	114793	Hs.654630	NM_052905	ENSG00000157827	FMNL2	FMNL2	FHOD2	formin-like 2	protein-coding	4.7	0.769	10	10	2	4.94	5.11e-05	5.79	1.38e-05	0.97
chr1-26	chr1	203309158	203309300	+	6.6	0.737	TTS (NM_002023)	TTS (NM_002023)	11060	11060	NM_002023	2331	Hs.519168	NM_002023	ENSG00000122176	FMOD	FMOD	SLRR2E	fibromodulin	protein-coding	6.6	0.737	14	14	3.2	4.34	7.56e-06	8.76	1.85e-09	0.96
chr9-450	chr9	132795455	132795597	+	4.7	0.917	intron (NM_015033, intron 1 of 16)	MIRc|SINE|MIR	9947	9947	NM_015033	23048	Hs.189409	NM_015033	ENSG00000187239	FNBP1	FNBP1	FBP17	formin binding protein 1	protein-coding	4.7	0.917	10	10	2	4.94	5.11e-05	5.1	3.92e-05	0.97
chr1-175	chr1	93909464	93909606	+	5.1	0.75	Intergenic	Intergenic	-4153	4153	NM_017737	54874	Hs.134060	NM_001024948	ENSG00000137942	FNBP1L	FNBP1L	C1orf39|TOCA1	formin binding protein 1-like	protein-coding	5.1	0.75	11	11	2	5.44	9.23e-06	6.16	2.91e-06	0.97
chr3-39	chr3	171879517	171879659	+	5.1	0.812	intron (NM_022763, intron 3 of 25)	L1MB8|LINE|L1	121244	121244	NM_001135095	64778	Hs.159430	NM_001135095	ENSG00000075420	FNDC3B	FNDC3B	FAD104|PRO4979|YVTM2421	fibronectin type III domain containing 3B	protein-coding	5.1	0.812	12	11	2	5.44	9.23e-06	9.55	4.16e-08	0.97
chr5-1580	chr5	131110208	131110348	+	5.3	0.923	intron (NM_133372, intron 1 of 17)	intron (NM_133372, intron 1 of 17)	22478	22478	NM_133372	96459	Hs.591273	NM_001008738	ENSG00000217128	FNIP1	FNIP1	-	folliculin interacting protein 1	protein-coding	5.3	0.923	11	10	1.8	5.66	1.66e-05	8.8	3.53e-07	0.97
chr19-22	chr19	45970553	45970695	+	5.1	0.857	promoter-TSS (NM_001114171)	promoter-TSS (NM_001114171)	-629	629	NM_001114171	2354	Hs.590958	NM_001114171	ENSG00000125740	FOSB	FOSB	AP-1|G0S3|GOS3|GOSB	FBJ murine osteosarcoma viral oncogene homolog B	protein-coding	5.1	0.857	12	11	2	5.44	9.23e-06	6.94	9.34e-07	0.97
chr14-356	chr14	38188479	38188621	+	5.1	0.688	Intergenic	L1MD1|LINE|L1	-124225	124225	NM_004496	3169	Hs.163484	NM_004496	ENSG00000129514	FOXA1	FOXA1	HNF3A|TCF3A	forkhead box A1	protein-coding	5.1	0.688	11	11	2	5.44	9.23e-06	5.87	4.52e-06	0.97
chr20-182	chr20	22705796	22705936	+	5.3	0.667	Intergenic	Intergenic	-139765	139765	NM_153675	3170	Hs.155651	NM_021784	ENSG00000125798	FOXA2	FOXA2	HNF3B|TCF3B	forkhead box A2	protein-coding	5.3	0.667	10	10	2	5.03	4.45e-05	6.4	5.81e-06	0.97
chr14-14	chr14	29146452	29146592	+	7.4	0.737	Intergenic	MLT1E3|LTR|ERVL-MaLR	-89756	89756	NM_005249	2290	Hs.741222	NM_005249	ENSG00000176165	FOXG1	FOXG1	BF1|BF2|FHKL3|FKH2|FKHL1|FKHL2|FKHL3|FKHL4|FOXG1A|FOXG1B|FOXG1C|HBF-1|HBF-2|HBF-3|HBF-G2|HBF2|HFK1|HFK2|HFK3|KHL2|QIN	forkhead box G1	protein-coding	7.4	0.737	14	14	4	3.52	7.23e-05	6.16	1.36e-07	0.95
chr5-307	chr5	169577875	169578015	+	6.9	0.778	Intergenic	MIR|SINE|MIR	45028	45028	NM_012188	2299	Hs.87236	NM_012188	ENSG00000168269	FOXI1	FOXI1	FKH10|FKHL10|FREAC-6|FREAC6|HFH-3|HFH3	forkhead box I1	protein-coding	6.9	0.778	13	13	2.7	4.9	4.48e-06	8.8	6.5e-09	0.96
chr16-232	chr16	86697783	86697923	+	4.8	0.833	Intergenic	Intergenic	85738	85738	NM_005250	2300	Hs.533830	NM_005250	ENSG00000176678	FOXL1	FOXL1	FKH6|FKHL11|FREAC7	forkhead box L1	protein-coding	4.8	0.833	10	9	1.8	5.09	9.58e-05	5.66	4.33e-05	0.97
chr12-178	chr12	109718662	109718802	+	4.8	0.9	intron (NM_213596, intron 9 of 9)	intron (NM_213596, intron 9 of 9)	28293	28293	NM_213596	121643	Hs.528316	NM_213596	ENSG00000139445	FOXN4	FOXN4	-	forkhead box N4	protein-coding	4.8	0.9	9	9	1.8	5.09	9.58e-05	10.18	3.74e-07	0.97
chr3-79	chr3	71191611	71191751	+	4.8	0.714	intron (NM_001244816, intron 5 of 19)	MLT1E3|LTR|ERVL-MaLR	-11589	11589	NM_001244815	27086	Hs.59368	NM_001012505	ENSG00000114861	FOXP1	FOXP1	12CC4|QRF1|hFKH1B	forkhead box P1	protein-coding	4.8	0.714	10	9	1.8	5.09	9.58e-05	6.4	1.68e-05	0.97
chr7-157	chr7	114169894	114170036	+	5.1	0.857	intron (NM_148898, intron 2 of 17)	intron (NM_148898, intron 2 of 17)	103408	103408	NM_148899	93986	Hs.282787	NM_001172766	ENSG00000128573	FOXP2	FOXP2	CAGH44|SPCH1|TNRC10	forkhead box P2	protein-coding	5.1	0.857	11	11	2	5.44	9.23e-06	6.7	1.31e-06	0.97
chr9-459	chr9	130590926	130591066	+	4.8	0.625	intron (NM_000118, intron 3 of 13)	intron (NM_000118, intron 3 of 13)	25488	25488	NM_001018078	2356	Hs.335084	NM_001018078	ENSG00000136877	FPGS	FPGS	-	folylpolyglutamate synthase	protein-coding	4.8	0.625	9	9	1.8	5.09	9.58e-05	10.18	3.74e-07	0.97
chr9-264	chr9	14784539	14784681	+	4.7	0.625	exon (NM_144966, exon 25 of 38)	exon (NM_144966, exon 25 of 38)	-5079	5079	NM_001177704	158326	Hs.50850	NM_001177704	ENSG00000164946	FREM1	FREM1	BNAR|C9orf143|C9orf145|C9orf154|MOTA|TILRR|TRIGNO2	FRAS1 related extracellular matrix 1	protein-coding	4.7	0.625	10	10	2	4.94	5.11e-05	6.25	7.1e-06	0.97
chr6-321	chr6	116382122	116382262	+	4.8	0.714	promoter-TSS (NM_002031)	promoter-TSS (NM_002031)	-271	271	NM_002031	2444	Hs.89426	NM_002031	ENSG00000111816	FRK	FRK	GTK|PTK5|RAK	fyn-related kinase	protein-coding	4.8	0.714	9	9	1.8	5.09	9.58e-05	6.82	1.03e-05	0.97
chr14-32	chr14	51989642	51989784	+	6.6	0.607	intron (NM_001042481, intron 1 of 14)	L1ME4a|LINE|L1	33874	33874	NM_001042481	122786	Hs.434914	NM_001042481	ENSG00000139926	FRMD6	FRMD6	C14orf31|EX1|Willin|c14_5320	FERM domain containing 6	protein-coding	6.6	0.607	15	14	4	3.48	8.22e-05	3.71	4.16e-05	0.96
chr14-49	chr14	52088749	52088889	+	6.9	0.737	intron (NM_001042481, intron 2 of 14)	Arthur1C|DNA|hAT-Tip100	-22149	22149	NR_051990	100874185	Hs.578226	NR_047477		FRMD6-AS2	FRMD6-AS2	-	FRMD6 antisense RNA 2	miscRNA	6.9	0.737	13	13	2.7	4.9	4.48e-06	4.53	1.02e-05	0.96
chr9-122	chr9	37656496	37656636	+	5.3	0.714	intron (NM_014907, intron 1 of 15)	intron (NM_014907, intron 1 of 15)	5514	5514	NM_014907	22844	Hs.163990	NM_014907	ENSG00000070601	FRMPD1	FRMPD1	FRMD2	FERM and PDZ domain containing 1	protein-coding	5.3	0.714	10	10	1.8	5.66	1.66e-05	8.8	3.53e-07	0.97
chr14-768	chr14	44871219	44871359	+	4.8	0.75	Intergenic	Intergenic	105210	105210	NM_032135	84075	Hs.307086	NM_032135	ENSG00000189139	FSCB	FSCB	C14orf155	fibrous sheath CABYR binding protein	protein-coding	4.8	0.75	9	9	1.8	5.09	9.58e-05	6.15	2.28e-05	0.97
chr15-25	chr15	40075517	40075659	+	5.6	0.737	promoter-TSS (NM_152597)	promoter-TSS (NM_152597)	-549	549	NM_152597	161835	Hs.129598	NM_152597	ENSG00000150667	FSIP1	FSIP1	-	fibrous sheath interacting protein 1	protein-coding	5.6	0.737	12	12	2.4	4.96	9.07e-06	6.83	3.61e-07	0.96
chr2-397	chr2	186408073	186408215	+	4.7	0.769	Intergenic	Intergenic	-195211	195211	NM_173651	401024	Hs.98025	NM_207482	ENSG00000188738	FSIP2	FSIP2	-	fibrous sheath interacting protein 2	protein-coding	4.7	0.769	10	10	2	4.94	5.11e-05	8.47	5e-07	0.97
chr4-69	chr4	163066972	163067114	+	5.6	0.75	intron (NM_020116, intron 1 of 15)	intron (NM_020116, intron 1 of 15)	18143	18143	NM_020116	56884	Hs.32452	NM_001128427	ENSG00000168843	FSTL5	FSTL5	-	follistatin-like 5	protein-coding	5.6	0.75	12	12	2	5.93	1.53e-06	9.8	7.68e-09	0.96
chr5-6953	chr5	121098930	121099070	+	4.8	0.75	Intergenic	Intergenic	-88650	88650	NM_177478	94033	Hs.105324	NM_177478	ENSG00000181867	FTMT	FTMT	MTF	ferritin mitochondrial	protein-coding	4.8	0.75	9	9	1.8	5.09	9.58e-05	10.18	3.74e-07	0.97
chr16-120	chr16	53760545	53760687	+	5.1	0.765	intron (NM_001080432, intron 1 of 8)	intron (NM_001080432, intron 1 of 8)	22741	22741	NM_001080432	79068	Hs.528833	NM_001080432	ENSG00000140718	FTO	FTO	-	fat mass and obesity associated	protein-coding	5.1	0.765	11	11	2	5.44	9.23e-06	6.88	1.02e-06	0.97
chr16-435	chr16	71324575	71324715	+	4.8	0.692	Intergenic	L1M5|LINE|L1	-1136	1136	NM_018348	55783	Hs.72782	NM_001099642	ENSG00000180917	FTSJD1	FTSJD1	AFT|MTr2	FtsJ methyltransferase domain containing 1	protein-coding	4.8	0.692	9	9	1.8	5.09	9.58e-05	5.82	3.52e-05	0.97
chr6-15	chr6	143832201	143832343	+	7.5	0.87	intron (NM_032020, intron 1 of 6)	intron (NM_032020, intron 1 of 6)	748	748	NM_032020	2519	Hs.17680	NM_032020	ENSG00000001036	FUCA2	FUCA2	dJ20N2.5	fucosidase, alpha-L- 2, plasma	protein-coding	7.5	0.87	17	16	4.8	3.31	4.69e-05	6.94	3.49e-09	0.95
chr2-247	chr2	84485010	84485152	+	4.7	0.917	Intergenic	Intergenic	-32725	32725	NR_003663	388965	Hs.731102	NR_003663		FUNDC2P2	FUNDC2P2	-	FUN14 domain containing 2 pseudogene 2	pseudo	4.7	0.917	10	10	2	4.94	5.11e-05	9.89	1.24e-07	0.97
chr8-239	chr8	33073809	33073949	+	5.3	0.769	Intergenic	Intergenic	256785	256785	NM_032664	84750	Hs.458713	NM_032664	ENSG00000172728	FUT10	FUT10	-	fucosyltransferase 10 (alpha (1,3) fucosyltransferase)	protein-coding	5.3	0.769	10	10	1.8	5.66	1.66e-05	7.34	1.78e-06	0.97
chr14-1378	chr14	65928938	65929080	+	4.7	0.688	intron (NM_004480, intron 2 of 9)	intron (NM_004480, intron 2 of 9)	49561	49561	NR_038170	2530	Hs.654961	NM_004480	ENSG00000033170	FUT8	FUT8	-	fucosyltransferase 8 (alpha (1,6) fucosyltransferase)	protein-coding	4.7	0.688	10	10	2	4.94	5.11e-05	5.38	2.53e-05	0.97
chr3-137	chr3	180642216	180642356	+	5.3	0.909	intron (NM_001013439, intron 2 of 17)	intron (NM_001013439, intron 2 of 17)	12052	12052	NM_001013439	8087	Hs.478407	NM_001013438	ENSG00000114416	FXR1	FXR1	FXR1P	fragile X mental retardation, autosomal homolog 1	protein-coding	5.3	0.909	10	10	1.8	5.66	1.66e-05	9.27	2.22e-07	0.97
chr5-87	chr5	39219092	39219234	+	7.5	0.708	intron (NM_001243093, intron 1 of 18)	intron (NM_001243093, intron 1 of 18)	517	517	NM_001465	2533	Hs.691768	NM_001243093	ENSG00000082074	FYB	FYB	ADAP|PRO0823|SLAP-130	FYN binding protein	protein-coding	7.5	0.708	16	16	4.8	3.31	4.69e-05	4.27	2.16e-06	0.95
chr7-300	chr7	91186943	91187085	+	4.7	0.647	Intergenic	Intergenic	293231	293231	NM_003505	8321	Hs.94234	NM_003505	ENSG00000157240	FZD1	FZD1	-	frizzled family receptor 1	protein-coding	4.7	0.647	10	10	2	4.94	5.11e-05	6.49	5.18e-06	0.97
chr17-367	chr17	42621583	42621725	+	4.7	0.667	Intergenic	MIRc|SINE|MIR	-13158	13158	NM_001466	2535	Hs.732654	NM_001466	ENSG00000180340	FZD2	FZD2	Fz2|fz-2|fzE2|hFz2	frizzled family receptor 2	protein-coding	4.7	0.667	10	10	2	4.94	5.11e-05	5.47	2.22e-05	0.97
chr11-316	chr11	86650095	86650237	+	4.7	0.769	Intergenic	Intergenic	16274	16274	NM_012193	8322	Hs.591968	NM_012193	ENSG00000174804	FZD4	FZD4	CD344|EVR1|FEVR|FZD4S|Fz-4|FzE4|GPCR	frizzled family receptor 4	protein-coding	4.7	0.769	10	10	2	4.94	5.11e-05	9.13	2.53e-07	0.97
chr8-260	chr8	104320270	104320412	+	4.7	0.688	intron (NM_001164616, intron 3 of 7)	ERVL-E-int|LTR|ERVL	9282	9282	NM_003506	8323	Hs.591863	NM_001164615	ENSG00000164930	FZD6	FZD6	FZ-6|FZ6|HFZ6|NDNC10	frizzled family receptor 6	protein-coding	4.7	0.688	11	10	2	4.94	5.11e-05	7.31	1.84e-06	0.97
chr14-706	chr14	30916870	30917012	+	4.7	0.846	Intergenic	Intergenic	-111388	111388	NM_017769	55632	Hs.605081	NM_017769	ENSG00000092140	G2E3	G2E3	KIAA1333|PHF7B	G2/M-phase specific E3 ubiquitin protein ligase	protein-coding	4.7	0.846	10	10	2	4.94	5.11e-05	6.25	7.1e-06	0.97
chr5-7053	chr5	151209914	151210054	+	4.8	0.692	intron (NM_001146040, intron 7 of 8)	L1MB7|LINE|L1	58508	58508	NM_005754	10146	Hs.587054	NM_005754	ENSG00000145907	G3BP1	G3BP1	G3BP|HDH-VIII	GTPase activating protein (SH3 domain) binding protein 1	protein-coding	4.8	0.692	9	9	1.8	5.09	9.58e-05	10.18	3.74e-07	0.97
chr4-68	chr4	144310423	144310563	+	5.3	0.733	intron (NM_207123, intron 1 of 10)	intron (NM_207123, intron 1 of 10)	52510	52510	NM_002039	2549	Hs.618456	NM_002039	ENSG00000109458	GAB1	GAB1	-	GRB2-associated binding protein 1	protein-coding	5.3	0.733	11	10	1.8	5.66	1.66e-05	7.49	1.48e-06	0.97
chr11-294	chr11	78116572	78116714	+	4.7	0.714	intron (NM_080491, intron 1 of 9)	L1MDa|LINE|L1	12225	12225	NM_080491	9846	Hs.429434	NM_012296	ENSG00000033327	GAB2	GAB2	-	GRB2-associated binding protein 2	protein-coding	4.7	0.714	10	10	2	4.94	5.11e-05	6.09	8.92e-06	0.97
chr3-26	chr3	97736061	97736203	+	5.6	0.737	intron (NR_047685, intron 4 of 9)	Charlie22a|DNA|hAT-Charlie	18016	18016	NM_001105580	200959	Hs.534578	NM_001105580		GABRR3	GABRR3	-	gamma-aminobutyric acid (GABA) A receptor, rho 3	protein-coding	5.6	0.737	12	12	2	5.93	1.53e-06	4.76	1.37e-05	0.96
chr19-25	chr19	2496207	2496349	+	5.1	0.857	Intergenic	Intergenic	20155	20155	NM_015675	4616	Hs.110571	NM_015675	ENSG00000099860	GADD45B	GADD45B	GADD45BETA|MYD118	growth arrest and DNA-damage-inducible, beta	protein-coding	5.1	0.857	11	11	2	5.44	9.23e-06	9.92	2.84e-08	0.97
chr3-46	chr3	31147527	31147669	+	5.1	0.917	Intergenic	L1PB4|LINE|L1	-211445	211445	NM_207359	339896	Hs.657052	NM_207359	ENSG00000144644	GADL1	GADL1	-	glutamate decarboxylase-like 1	protein-coding	5.1	0.917	11	11	2	5.44	9.23e-06	5.97	3.91e-06	0.97
chr2-369	chr2	158117079	158117221	+	4.7	0.688	intron (NM_014568, intron 1 of 9)	intron (NM_014568, intron 1 of 9)	2810	2810	NM_014568	11227	Hs.269027	NM_014568	ENSG00000136542	GALNT5	GALNT5	GALNAC-T5	UDP-N-acetyl-alpha-D-galactosamine:polypeptide N-acetylgalactosaminyltransferase 5 (GalNAc-T5)	protein-coding	4.7	0.688	10	10	2	4.94	5.11e-05	5.34	2.7e-05	0.97
chr4-302	chr4	174044064	174044206	+	4.7	0.786	Intergenic	Intergenic	-45769	45769	NM_017423	51809	Hs.548088	NM_017423	ENSG00000109586	GALNT7	GALNT7	GALNAC-T7|GalNAcT7	UDP-N-acetyl-alpha-D-galactosamine:polypeptide N-acetylgalactosaminyltransferase 7 (GalNAc-T7)	protein-coding	4.7	0.786	10	10	2	4.94	5.11e-05	7.71	1.14e-06	0.97
chr11-34	chr11	11603526	11603666	+	5.8	0.917	intron (NM_198516, intron 1 of 10)	L2a|LINE|L2	39965	39965	NM_198516	374378	Hs.655152	NM_198516	ENSG00000110328	GALNTL4	GALNTL4	GALNT15|GALNT18|GalNAc-T15	UDP-N-acetyl-alpha-D-galactosamine:polypeptide N-acetylgalactosaminyltransferase-like 4	protein-coding	5.8	0.917	11	11	1.8	6.22	2.63e-06	10.47	1.65e-08	0.97
chr4-138	chr4	173198776	173198916	+	5.3	0.846	intron (NM_001034845, intron 3 of 12)	intron (NM_001034845, intron 3 of 12)	464271	464271	NM_001034845	442117	Hs.386236	NM_001034845	ENSG00000174473	GALNTL6	GALNTL6	GALNT17	UDP-N-acetyl-alpha-D-galactosamine:polypeptide N-acetylgalactosaminyltransferase-like 6	protein-coding	5.3	0.846	10	10	2	5.03	4.45e-05	8.69	3.94e-07	0.97
chr3-312	chr3	115437272	115437412	+	4.8	0.75	intron (NM_002045, intron 2 of 2)	intron (NM_002045, intron 2 of 2)	95191	95191	NM_001130064	2596	Hs.134974	NM_001130064	ENSG00000172020	GAP43	GAP43	B-50|PP46	growth associated protein 43	protein-coding	4.8	0.75	9	9	1.8	5.09	9.58e-05	8.93	1.2e-06	0.97
chr5-6873	chr5	57787592	57787732	+	4.8	0.643	intron (NM_152687, intron 1 of 2)	intron (NM_152687, intron 1 of 2)	332	332	NM_152687	202309	Hs.547697	NM_152687	ENSG00000175857	GAPT	GAPT	C5orf29	GRB2-binding adaptor protein, transmembrane	protein-coding	4.8	0.643	9	9	1.8	5.09	9.58e-05	9.19	8.6e-07	0.97
chr4-89	chr4	22759951	22760091	+	5.3	0.667	intron (NM_020973, intron 4 of 4)	intron (NM_020973, intron 4 of 4)	65473	65473	NM_001128432	57733	Hs.653107	NM_001128432	ENSG00000249948	GBA3	GBA3	CBGL1|GLUC|KLrP	glucosidase, beta, acid 3 (cytosolic)	protein-coding	5.3	0.667	10	10	1.8	5.66	1.66e-05	9.92	1.2e-07	0.97
chr3-20	chr3	81792482	81792624	+	5.1	0.867	intron (NM_000158, intron 1 of 15)	intron (NM_000158, intron 1 of 15)	18397	18397	NM_000158	2632	Hs.436062	NM_000158	ENSG00000114480	GBE1	GBE1	APBD|GBE|GSD4	glucan (1,4-alpha-), branching enzyme 1	protein-coding	5.1	0.867	12	11	2	5.44	9.23e-06	6.53	1.68e-06	0.97
chr2-111	chr2	237089283	237089423	+	5.3	0.786	Intergenic	Intergenic	-12701	12701	NM_001485	2637	Hs.184945	NM_001485	ENSG00000168505	GBX2	GBX2	-	gastrulation brain homeobox 2	protein-coding	5.3	0.786	11	10	1.8	5.66	1.66e-05	10.51	6.46e-08	0.97
chr2-375	chr2	163053627	163053769	+	4.7	0.846	intron (NM_004460, intron 16 of 25)	intron (NM_004460, intron 16 of 25)	-44784	44784	NM_002054	2641	Hs.516494	NM_002054	ENSG00000115263	GCG	GCG	GLP1|GLP2|GRPP	glucagon	protein-coding	4.7	0.846	10	10	2	4.94	5.11e-05	7.01	2.64e-06	0.97
chr6-66	chr6	53357692	53357834	+	5.1	0.684	Intergenic	Intergenic	52164	52164	NM_001197115	2729	Hs.654465	NM_001197115	ENSG00000001084	GCLC	GCLC	GCL|GCS|GLCL|GLCLC	glutamate-cysteine ligase, catalytic subunit	protein-coding	5.1	0.684	12	11	2	5.44	9.23e-06	10.76	1.26e-08	0.97
chr9-61	chr9	74762639	74762779	+	5.3	0.75	intron (NM_001242507, intron 1 of 13)	intron (NM_001242507, intron 1 of 13)	-1558	1558	NM_001242506	9615	Hs.494163	NM_001242505	ENSG00000119125	GDA	GDA	CYPIN|GUANASE|NEDASIN	guanine deaminase	protein-coding	5.3	0.75	11	10	1.8	5.66	1.66e-05	7.41	1.62e-06	0.97
chr5-850	chr5	37900350	37900492	+	5.6	0.7	Intergenic	Charlie4a|DNA|hAT-Charlie	-60639	60639	NM_000514	2668	Hs.248114	NM_000514	ENSG00000168621	GDNF	GDNF	ATF1|ATF2|HFB1-GDNF|HSCR3	glial cell derived neurotrophic factor	protein-coding	5.6	0.7	13	12	2	5.93	1.53e-06	5.67	2.43e-06	0.96
chrX-157	chrX	69600280	69600420	+	4.8	0.818	intron (NM_012310, intron 18 of 30)	L1MB8|LINE|L1	-42531	42531	NM_001171193	54857	Hs.438712	NM_001171191	ENSG00000130055	GDPD2	GDPD2	GDE3|OBDPF	glycerophosphodiester phosphodiesterase domain containing 2	protein-coding	4.8	0.818	9	9	1.8	5.09	9.58e-05	10.18	3.74e-07	0.97
chr1-395	chr1	90374060	90374202	+	4.7	0.733	intron (NM_001134479, intron 2 of 2)	intron (NM_001134479, intron 2 of 2)	86394	86394	NR_002830	492303	Hs.550796	NR_002830		GEMIN8P4	GEMIN8P4	-	gem (nuclear organelle) associated protein 8 pseudogene 4	pseudo	4.7	0.733	10	10	2	4.94	5.11e-05	5.42	2.37e-05	0.97
chr3-128	chr3	158345897	158346037	+	4.8	0.833	Intergenic	LTR10G|LTR|ERV1	-16350	16350	NM_024996	85476	Hs.518355	NM_024996	ENSG00000168827	GFM1	GFM1	COXPD1|EFG|EFG1|EFGM|EGF1|GFM|hEFG1	G elongation factor, mitochondrial 1	protein-coding	4.8	0.833	10	9	1.8	5.09	9.58e-05	10.18	3.74e-07	0.97
chr6-181	chr6	13475038	13475180	+	4.7	0.588	intron (NM_001242629, intron 1 of 1)	intron (NM_001242629, intron 1 of 1)	-2814	2814	NR_038459	54438	Hs.484686	NM_033069	ENSG00000145990	GFOD1	GFOD1	ADG-90|C6orf114	glucose-fructose oxidoreductase domain containing 1	protein-coding	4.7	0.588	10	10	2	4.94	5.11e-05	8.07	7.65e-07	0.97
chr5-7154	chr5	179758065	179758205	+	4.8	0.692	intron (NM_005110, intron 5 of 18)	intron (NM_005110, intron 5 of 18)	22180	22180	NM_005110	9945	Hs.696497	NM_005110	ENSG00000131459	GFPT2	GFPT2	GFAT2	glutamine-fructose-6-phosphate transaminase 2	protein-coding	4.8	0.692	9	9	1.8	5.09	9.58e-05	6.89	9.49e-06	0.97
chr8-568	chr8	21701886	21702026	+	4.8	0.833	Intergenic	Intergenic	-55610	55610	NM_001165038	2675	Hs.441202	NM_001165038	ENSG00000168546	GFRA2	GFRA2	GDNFRB|NRTNR-ALPHA|NTNRA|RETL2|TRNR2	GDNF family receptor alpha 2	protein-coding	4.8	0.833	9	9	1.8	5.09	9.58e-05	10.18	3.74e-07	0.97
chr1-123	chr1	235495115	235495255	+	5.8	0.917	intron (NR_036605, intron 1 of 2)	intron (NR_036605, intron 1 of 2)	3316	3316	NR_036605	9453	Hs.730768	NM_001037277	ENSG00000152904	GGPS1	GGPS1	GGPPS|GGPPS1	geranylgeranyl diphosphate synthase 1	protein-coding	5.8	0.917	11	11	1.8	6.22	2.63e-06	5.74	5.61e-06	0.97
chr5-204	chr5	42530463	42530605	+	7	0.938	intron (NM_001242400, intron 2 of 10)	intron (NM_001242400, intron 2 of 10)	-17611	17611	NM_001242402	2690	Hs.688223	NM_000163	ENSG00000112964	GHR	GHR	GHBP	growth hormone receptor	protein-coding	7	0.938	15	15	4	3.72	2.16e-05	9.82	1.05e-10	0.95
chr2-226	chr2	233564285	233564425	+	5.3	0.588	intron (NM_001103148, intron 1 of 27)	intron (NM_001103148, intron 1 of 27)	2340	2340	NM_015575	26058	Hs.565319	NM_001103146	ENSG00000204120	GIGYF2	GIGYF2	GYF2|PARK11|PERQ2|PERQ3|TNRC15	GRB10 interacting GYF protein 2	protein-coding	5.3	0.588	10	10	1.8	5.66	1.66e-05	7.91	9.13e-07	0.97
chr4-121	chr4	107290652	107290792	+	4.8	0.786	Intergenic	Intergenic	-2130	2130	NM_001195138	100507096	Hs.722750	NM_001195138		GIMD1	GIMD1	-	GIMAP family P-loop NTPase domain containing 1	protein-coding	4.8	0.786	10	9	1.8	5.09	9.58e-05	5.61	4.63e-05	0.97
chr20-24	chr20	25388377	25388517	+	6.3	0.765	5' UTR (NM_021067, exon 1 of 7)	5' UTR (NM_021067, exon 1 of 7)	124	124	NM_021067	9837	Hs.658464	NM_021067	ENSG00000101003	GINS1	GINS1	PSF1	GINS complex subunit 1 (Psf1 homolog)	protein-coding	6.3	0.765	13	12	2.7	4.52	2.23e-05	8.54	3.41e-08	0.96
chr16-167	chr16	58412912	58413052	+	5.3	0.833	Intergenic	Intergenic	-13316	13316	NM_001126130	64785	Hs.605546	NM_001126129	ENSG00000181938	GINS3	GINS3	PSF3	GINS complex subunit 3 (Psf3 homolog)	protein-coding	5.3	0.833	10	10	1.8	5.66	1.66e-05	6.4	5.81e-06	0.97
chr6-132	chr6	121987830	121987970	+	5.3	0.714	Intergenic	Intergenic	231155	231155	NM_000165	2697	Hs.74471	NM_000165	ENSG00000152661	GJA1	GJA1	AVSD3|CX43|DFNB38|GJAL|HLHS1|HSS|ODDD	gap junction protein, alpha 1, 43kDa	protein-coding	5.3	0.714	10	10	1.8	5.66	1.66e-05	7.57	1.35e-06	0.97
chr17-27	chr17	42906114	42906256	+	6.1	0.636	intron (NM_001080383, intron 1 of 2)	intron (NM_001080383, intron 1 of 2)	1422	1422	NM_005497	10052	Hs.712052	NM_001080383	ENSG00000182963	GJC1	GJC1	CX45|GJA7	gap junction protein, gamma 1, 45kDa	protein-coding	6.1	0.636	14	13	2	6.43	2.36e-07	7.71	2.99e-08	0.96
chr4-234	chr4	80336870	80337012	+	4.7	0.769	Intergenic	Intergenic	-7569	7569	NM_033214	2712	Hs.98008	NM_033214	ENSG00000196475	GK2	GK2	GKP2|GKTA	glycerol kinase 2	protein-coding	4.7	0.769	10	10	2	4.94	5.11e-05	9.89	1.24e-07	0.97
chr4-380	chr4	166223237	166223377	+	4.8	0.769	intron (NM_001161522, intron 7 of 13)	intron (NM_001161522, intron 7 of 13)	-22132	22132	NR_026575	2713	Hs.654557	NR_026575		GK3P	GK3P	GKP3|GKTB	glycerol kinase 3 pseudogene	pseudo	4.8	0.769	9	9	1.8	5.09	9.58e-05	7.37	5.58e-06	0.97
chr3-337	chr3	141964138	141964278	+	4.8	0.9	Intergenic	L1M1|LINE|L1	-19759	19759	NM_001039547	256356	Hs.741563	NM_152776	ENSG00000175066	GK5	GK5	-	glycerol kinase 5 (putative)	protein-coding	4.8	0.9	9	9	1.8	5.09	9.58e-05	10.18	3.74e-07	0.97
chr7-101	chr7	7995492	7995632	+	4.8	0.55	Intergenic	Intergenic	-12812	12812	NM_138426	113263	Hs.131673	NM_138426	ENSG00000106415	GLCCI1	GLCCI1	FAM117C|GCTR|GIG18|TSSN1	glucocorticoid induced transcript 1	protein-coding	4.8	0.55	10	9	1.8	5.09	9.58e-05	6.97	8.71e-06	0.97
chr2-186	chr2	121775157	121775297	+	5.3	0.714	Intergenic	MER97c|DNA|hAT-Tip100	220360	220360	NM_005270	2736	Hs.111867	NM_005270	ENSG00000074047	GLI2	GLI2	HPE9|THP1|THP2	GLI family zinc finger 2	protein-coding	5.3	0.714	10	10	2	5.03	4.45e-05	8.49	4.9e-07	0.97
chr9-21	chr9	4315899	4316041	+	6.1	0.773	Intergenic	Intergenic	-15935	15935	NM_001042413	169792	Hs.162125	NM_001042413	ENSG00000107249	GLIS3	GLIS3	ZNF515	GLIS family zinc finger 3	protein-coding	6.1	0.773	14	13	2.4	5.38	1.66e-06	6.22	3.36e-07	0.96
chr5-7054	chr5	151239890	151240030	+	4.8	0.833	intron (NM_001146040, intron 3 of 8)	intron (NM_001146040, intron 3 of 8)	64437	64437	NM_000171	2741	Hs.121490	NM_000171	ENSG00000145888	GLRA1	GLRA1	HKPX1|STHE	glycine receptor, alpha 1	protein-coding	4.8	0.833	9	9	1.8	5.09	9.58e-05	7.37	5.58e-06	0.97
chr4-304	chr4	175708323	175708465	+	4.7	0.846	intron (NM_006529, intron 2 of 9)	intron (NM_006529, intron 2 of 9)	42071	42071	NM_001042543	8001	Hs.413099	NM_001042543	ENSG00000145451	GLRA3	GLRA3	-	glycine receptor, alpha 3	protein-coding	4.7	0.846	10	10	2	4.94	5.11e-05	9.89	1.24e-07	0.97
chr4-72	chr4	158000916	158001056	+	4.8	0.824	intron (NM_001166060, intron 2 of 9)	intron (NM_001166060, intron 2 of 9)	3431	3431	NM_001166060	2743	Hs.32973	NM_000824	ENSG00000109738	GLRB	GLRB	HKPX2	glycine receptor, beta	protein-coding	4.8	0.824	11	9	1.8	5.09	9.58e-05	6.97	8.71e-06	0.97
chr2-530	chr2	191748618	191748758	+	4.8	0.833	intron (NM_014905, intron 1 of 17)	intron (NM_014905, intron 1 of 17)	3141	3141	NM_014905	2744	Hs.737608	NM_001256310	ENSG00000115419	GLS	GLS	AAD20|GAC|GAM|GLS1|KGA	glutaminase	protein-coding	4.8	0.833	9	9	1.8	5.09	9.58e-05	5.33	6.85e-05	0.97
chrX-104	chrX	120544240	120544380	+	5.3	0.846	Intergenic	L1MA4A|LINE|L1	362848	362848	NM_012084	2747	Hs.368538	NM_012084	ENSG00000182890	GLUD2	GLUD2	GDH2|GLUDP1	glutamate dehydrogenase 2	protein-coding	5.3	0.846	10	10	1.8	5.66	1.66e-05	8.38	5.46e-07	0.97
chr6-60	chr6	2108105	2108247	+	5.1	0.722	intron (NM_001253846, intron 4 of 10)	intron (NM_001253846, intron 4 of 10)	68049	68049	NM_001253846	2762	Hs.660919	NM_001253846	ENSG00000112699	GMDS	GMDS	GMD|SDR3E1	GDP-mannose 4,6-dehydratase	protein-coding	5.1	0.722	12	11	2	5.44	9.23e-06	7.41	4.96e-07	0.97
chr20-197	chr20	62259870	62260012	+	5.1	0.6	Intergenic	FLAM_C|SINE|Alu	-1560	1560	NM_012384	26205	Hs.473286	NM_012384	ENSG00000101216	GMEB2	GMEB2	P79PIF|PIF79	glucocorticoid modulatory element binding protein 2	protein-coding	5.1	0.6	12	11	2.4	4.55	4.58e-05	7.27	5.98e-07	0.97
chr14-239	chr14	54942453	54942593	+	5.8	0.688	3' UTR (NM_004124, exon 7 of 7)	3' UTR (NM_004124, exon 7 of 7)	13221	13221	NM_004124	2764	Hs.151413	NM_004124	ENSG00000197045	GMFB	GMFB	GMF	glia maturation factor, beta	protein-coding	5.8	0.688	11	11	1.8	6.22	2.63e-06	5.7	6.01e-06	0.97
chr3-302	chr3	190469928	190470070	+	4.7	0.714	Intergenic	L1MC1|LINE|L1	110466	110466	NM_001146686	647309	Hs.518490	NM_001146686	ENSG00000205835	GMNC	GMNC	GEMC1	geminin coiled-coil domain containing	protein-coding	4.7	0.714	10	10	2	4.94	5.11e-05	9.89	1.24e-07	0.97
chr9-23	chr9	80352453	80352593	+	7.4	0.882	intron (NM_002072, intron 5 of 6)	intron (NM_002072, intron 5 of 6)	-89291	89291	NM_004297	9630	Hs.657795	NM_004297	ENSG00000156049	GNA14	GNA14	-	guanine nucleotide binding protein (G protein), alpha 14	protein-coding	7.4	0.882	14	14	1.8	7.92	6.44e-09	13.32	8.62e-12	0.95
chr7-24	chr7	79781496	79781636	+	6.9	0.64	intron (NM_001256414, intron 1 of 7)	intron (NM_001256414, intron 1 of 7)	16495	16495	NM_001256414	2770	Hs.134587	NM_001256414	ENSG00000127955	GNAI1	GNAI1	Gi	guanine nucleotide binding protein (G protein), alpha inhibiting activity polypeptide 1	protein-coding	6.9	0.64	14	13	2.7	4.9	4.48e-06	3.85	5.37e-05	0.96
chr20-357	chr20	57449054	57449196	+	5.1	0.722	intron (NM_001077490, intron 1 of 12)	intron (NM_001077490, intron 1 of 12)	-15055	15055	NR_003259	2778	Hs.125898	NM_000516	ENSG00000087460	GNAS	GNAS	AHO|C20orf45|GNAS1|GPSA|GSA|GSP|NESP|PHP1A|PHP1B|PHP1C|POH	GNAS complex locus	protein-coding	5.1	0.722	11	11	2.4	4.55	4.58e-05	6.01	3.63e-06	0.97
chr22-16	chr22	19854514	19854656	+	4.7	0.769	Intergenic	L1M5|LINE|L1	-12123	12123	NM_053004	54584	Hs.105642	NM_053004	ENSG00000185838	GNB1L	GNB1L	DGCRK3|GY2|WDR14|WDVCF	guanine nucleotide binding protein (G protein), beta polypeptide 1-like	protein-coding	4.7	0.769	10	10	2	4.94	5.11e-05	8.68	4.01e-07	0.97
chr15-101	chr15	52472952	52473092	+	4.8	0.692	promoter-TSS (NM_006578)	promoter-TSS (NM_006578)	-860	860	NM_006578	10681	Hs.155090	NM_006578	ENSG00000069966	GNB5	GNB5	GB5	guanine nucleotide binding protein (G protein), beta 5	protein-coding	4.8	0.692	9	9	1.8	5.09	9.58e-05	7.73	3.82e-06	0.97
chr9-116	chr9	36317657	36317797	+	5.3	0.75	Intergenic	Intergenic	-40674	40674	NM_001190388	10020	Hs.5920	NM_001128227	ENSG00000159921	GNE	GNE	DMRV|GLCNE|IBM2|NM|Uae1	glucosamine (UDP-N-acetyl)-2-epimerase/N-acetylmannosamine kinase	protein-coding	5.3	0.75	10	10	1.8	5.66	1.66e-05	6.18	7.89e-06	0.97
chr9-391	chr9	114456074	114456216	+	4.7	0.769	exon (NM_173521, exon 24 of 26)	exon (NM_173521, exon 24 of 26)	32294	32294	NM_001017998	2790	Hs.732002	NM_001017998	ENSG00000242616	GNG10	GNG10	-	guanine nucleotide binding protein (G protein), gamma 10	protein-coding	4.7	0.769	10	10	2	4.94	5.11e-05	7.39	1.68e-06	0.97
chr1-379	chr1	68304579	68304721	+	4.7	0.909	intron (NR_040077, intron 1 of 9)	intron (NR_040077, intron 1 of 9)	-5495	5495	NM_018841	55970	Hs.741259	NM_018841	ENSG00000172380	GNG12	GNG12	-	guanine nucleotide binding protein (G protein), gamma 12	protein-coding	4.7	0.909	10	10	2	4.94	5.11e-05	4.82	6.27e-05	0.97
chr14-103	chr14	52319974	52320114	+	6.3	0.65	Intergenic	Intergenic	-6978	6978	NM_053064	54331	Hs.741081	NM_001243773	ENSG00000186469	GNG2	GNG2	-	guanine nucleotide binding protein (G protein), gamma 2	protein-coding	6.3	0.65	12	12	2	6.03	1.29e-06	5.63	2.58e-06	0.96
chr1-139	chr1	235883635	235883777	+	5.1	0.65	intron (NM_000081, intron 40 of 52)	L1MC5|LINE|L1	-69652	69652	NM_001098721	2786	Hs.159711	NM_001098721	ENSG00000168243	GNG4	GNG4	-	guanine nucleotide binding protein (G protein), gamma 4	protein-coding	5.1	0.65	12	11	2	5.44	9.23e-06	5.62	6.87e-06	0.97
chr17-29	chr17	47268784	47268926	+	5.6	0.56	Intergenic	Intergenic	17888	17888	NM_031498	2793	Hs.181781	NM_001198754	ENSG00000167083	GNGT2	GNGT2	G-GAMMA-8|G-GAMMA-C|GNG8|GNG9|GNGT8	guanine nucleotide binding protein (G protein), gamma transducing activity polypeptide 2	protein-coding	5.6	0.56	14	12	2	5.93	1.53e-06	6.26	8.79e-07	0.96
chr1-64	chr1	38061308	38061448	+	5.3	0.75	exon (NM_013285, exon 1 of 16)	exon (NM_013285, exon 1 of 16)	208	208	NM_013285	29889	Hs.75528	NM_013285	ENSG00000134697	GNL2	GNL2	HUMAUANTIG|NGP1|Ngp-1	guanine nucleotide binding protein-like 2 (nucleolar)	protein-coding	5.3	0.75	11	10	2	5.03	4.45e-05	7.66	1.22e-06	0.97
chrX-47	chrX	54685935	54686075	+	5.3	0.786	Intergenic	L1PA16|LINE|L1	129361	129361	NM_019067	54552	Hs.654677	NM_001184819	ENSG00000130119	GNL3L	GNL3L	-	guanine nucleotide binding protein-like 3 (nucleolar)-like	protein-coding	5.3	0.786	10	10	1.8	5.66	1.66e-05	11.32	3.31e-08	0.97
chr14-24	chr14	53290560	53290700	+	7.4	0.714	Intergenic	Intergenic	-32244	32244	NM_198066	64841	Hs.702056	NM_198066	ENSG00000100522	GNPNAT1	GNPNAT1	GNPNAT|Gpnat1	glucosamine-phosphate N-acetyltransferase 1	protein-coding	7.4	0.714	14	14	1.8	7.92	6.44e-09	7.76	8.25e-09	0.95
chr8-572	chr8	25285360	25285500	+	4.8	0.9	TTS (NM_017634)	TTS (NM_017634)	-2874	2874	NM_000825	2796	Hs.82963	NM_000825	ENSG00000147437	GNRH1	GNRH1	GNRH|GRH|HH12|LHRH|LNRH	gonadotropin-releasing hormone 1 (luteinizing-releasing hormone)	protein-coding	4.8	0.9	9	9	1.8	5.09	9.58e-05	9.32	7.65e-07	0.97
chr9-368	chr9	88713511	88713653	+	4.7	0.8	intron (NM_177937, intron 1 of 9)	intron (NM_177937, intron 1 of 9)	928	928	NM_016548	51280	Hs.494337	NM_016548	ENSG00000135052	GOLM1	GOLM1	C9orf155|GOLPH2|GP73|PSEC0257|bA379P1.3	golgi membrane protein 1	protein-coding	4.7	0.8	10	10	2	4.94	5.11e-05	6.94	2.88e-06	0.97
chr5-815	chr5	32201226	32201368	+	5.6	0.812	Intergenic	L1MC4|LINE|L1	-26872	26872	NM_022130	64083	Hs.408909	NM_022130	ENSG00000113384	GOLPH3	GOLPH3	GOPP1|GPP34|MIDAS	golgi phosphoprotein 3 (coat-protein)	protein-coding	5.6	0.812	13	12	2	5.93	1.53e-06	5.59	2.79e-06	0.96
chr6-131	chr6	117926362	117926502	+	5.3	0.769	Intergenic	Intergenic	-2727	2727	NM_020399	57120	Hs.191539	NM_001017408	ENSG00000047932	GOPC	GOPC	CAL|FIG|GOPC1|PIST|dJ94G16.2	golgi-associated PDZ and coiled-coil motif containing	protein-coding	5.3	0.769	10	10	1.8	5.66	1.66e-05	7.74	1.11e-06	0.97
chr1-206	chr1	170500971	170501113	+	5.1	0.812	promoter-TSS (NM_152281)	promoter-TSS (NM_152281)	-221	221	NR_027397	92344	Hs.183702	NM_001146039	ENSG00000120370	GORAB	GORAB	GO|NTKLBP1|SCYL1BP1	golgin, RAB6-interacting	protein-coding	5.1	0.812	11	11	2.4	4.55	4.58e-05	6.88	1.02e-06	0.97
chr2-110	chr2	171786718	171786860	+	5.6	0.857	intron (NM_015530, intron 1 of 9)	intron (NM_015530, intron 1 of 9)	1753	1753	NM_015530	26003	Hs.431317	NM_001201428	ENSG00000115806	GORASP2	GORASP2	GOLPH6|GRASP55|GRS2|p59	golgi reassembly stacking protein 2, 55kDa	protein-coding	5.6	0.857	12	12	2	5.93	1.53e-06	7.24	1.95e-07	0.96
chr17-134	chr17	28816957	28817099	+	5.1	0.786	intron (NM_001007024, intron 4 of 8)	intron (NM_001007024, intron 4 of 8)	12602	12602	NM_004871	9527	Hs.462680	NM_001007024	ENSG00000108587	GOSR1	GOSR1	GOLIM2|GOS-28|GOS28|GOS28/P28|GS28|P28	golgi SNAP receptor complex member 1	protein-coding	5.1	0.786	11	11	2.4	4.55	4.58e-05	6.42	1.97e-06	0.97
chr16-345	chr16	59227270	59227410	+	4.8	0.9	Intergenic	Intergenic	-459094	459094	NM_002080	2806	Hs.599470	NM_002080	ENSG00000125166	GOT2	GOT2	KAT4|KATIV|mitAAT	glutamic-oxaloacetic transaminase 2, mitochondrial (aspartate aminotransferase 2)	protein-coding	4.8	0.9	9	9	1.8	5.09	9.58e-05	7.64	4.21e-06	0.97
chr1-213	chr1	167035818	167035958	+	4.8	0.917	intron (NM_005814, intron 3 of 6)	intron (NM_005814, intron 3 of 6)	23980	23980	NM_005814	10223	Hs.651244	NM_005814	ENSG00000143167	GPA33	GPA33	A33	glycoprotein A33 (transmembrane)	protein-coding	4.8	0.917	10	9	1.8	5.09	9.58e-05	9.32	7.65e-07	0.97
chr10-202	chr10	113937122	113937262	+	4.8	0.714	intron (NM_001244949, intron 5 of 21)	intron (NM_001244949, intron 5 of 21)	6345	6345	NM_001244949	57678	Hs.42586	NM_001244949	ENSG00000119927	GPAM	GPAM	GPAT|GPAT1	glycerol-3-phosphate acyltransferase, mitochondrial	protein-coding	4.8	0.714	9	9	1.8	5.09	9.58e-05	7.64	4.21e-06	0.97
chr1-275	chr1	217781748	217781888	+	4.8	0.75	intron (NM_018040, intron 5 of 9)	intron (NM_018040, intron 5 of 9)	22591	22591	NM_018040	55105	Hs.420757	NM_018040	ENSG00000092978	GPATCH2	GPATCH2	CT110|GPATC2|PPP1R30|RP11-361K17.1	G patch domain containing 2	protein-coding	4.8	0.75	10	9	1.8	5.09	9.58e-05	5.33	6.85e-05	0.97
chr17-306	chr17	42543215	42543355	+	4.8	0.643	intron (NM_001002909, intron 2 of 7)	intron (NM_001002909, intron 2 of 7)	37672	37672	NM_001002909	23131	Hs.463129	NM_001002909	ENSG00000186566	GPATCH8	GPATCH8	GPATC8|KIAA0553	G patch domain containing 8	protein-coding	4.8	0.643	9	9	1.8	5.09	9.58e-05	6.09	2.46e-05	0.97
chr14-65	chr14	63735861	63736001	+	6.3	0.667	intron (NM_020663, intron 2 of 4)	intron (NM_020663, intron 2 of 4)	49662	49662	NM_145171	122876	Hs.375028	NM_145171		GPHB5	GPHB5	B5|GPB5|ZLUT1	glycoprotein hormone beta 5	protein-coding	6.3	0.667	13	12	1.8	6.79	3.83e-07	8.54	3.41e-08	0.96
chr14-287	chr14	66973906	66974046	+	4.8	0.647	promoter-TSS (NM_020806)	promoter-TSS (NM_020806)	-149	149	NM_020806	10243	Hs.208765	NM_001024218	ENSG00000171723	GPHN	GPHN	GEPH|GPH|GPHRYN|HKPX1	gephyrin	protein-coding	4.8	0.647	11	9	1.8	5.09	9.58e-05	7.37	5.58e-06	0.97
chr4-306	chr4	176732902	176733044	+	4.7	0.846	intron (NM_201592, intron 1 of 6)	intron (NM_201592, intron 1 of 6)	1292	1292	NM_201591	2823	Hs.75819	NM_001261447	ENSG00000150625	GPM6A	GPM6A	GPM6|M6A	glycoprotein M6A	protein-coding	4.7	0.846	10	10	2	4.94	5.11e-05	5.88	1.2e-05	0.97
chr6-106	chr6	47009715	47009855	+	5.3	0.625	intron (NM_153840, intron 1 of 14)	intron (NM_153840, intron 1 of 14)	297	297	NM_025048	266977	Hs.733762	NM_025048	ENSG00000153292	GPR110	GPR110	KPG_012|PGR19|hGPCR36	G protein-coupled receptor 110	protein-coding	5.3	0.625	10	10	1.8	5.66	1.66e-05	6.34	6.28e-06	0.97
chr2-230	chr2	26580029	26580169	+	4.8	0.818	intron (NM_033505, intron 1 of 9)	L1ME3|LINE|L1	-10414	10414	NM_153835	165082	Hs.631878	NM_001145168	ENSG00000173567	GPR113	GPR113	PGR23|hGPCR37	G protein-coupled receptor 113	protein-coding	4.8	0.818	9	9	1.8	5.09	9.58e-05	7.04	7.98e-06	0.97
chr6-23	chr6	142651695	142651837	+	5.6	0.85	intron (NM_198569, intron 2 of 24)	intron (NM_198569, intron 2 of 24)	28710	28710	NM_001032395	57211	Hs.318894	NM_001032394	ENSG00000112414	GPR126	GPR126	APG1|DREG|PS1TP2|VIGR	G protein-coupled receptor 126	protein-coding	5.6	0.85	15	12	2.4	4.96	9.07e-06	4.43	2.72e-05	0.96
chr3-83	chr3	100327000	100327142	+	5.1	0.917	Intergenic	MER47A|DNA|TcMar-Tigger	-1362	1362	NM_032787	84873	Hs.334511	NM_032787	ENSG00000144820	GPR128	GPR128	-	G protein-coupled receptor 128	protein-coding	5.1	0.917	11	11	2	5.44	9.23e-06	5.23	1.32e-05	0.97
chr14-1256	chr14	59929666	59929808	+	4.7	0.667	TTS (NM_022571)	TTS (NM_022571)	2322	2322	NM_022571	64582	Hs.647573	NM_022571	ENSG00000181619	GPR135	GPR135	HUMNPIIY20	G protein-coupled receptor 135	protein-coding	4.7	0.667	10	10	2	4.94	5.11e-05	4.63	8.72e-05	0.97
chr13-152	chr13	99974390	99974530	+	4.8	0.769	intron (NR_026644, intron 6 of 8)	intron (NR_026644, intron 6 of 8)	-14711	14711	NM_004951	1880	Hs.784	NM_004951	ENSG00000169508	GPR183	GPR183	EBI2	G protein-coupled receptor 183	protein-coding	4.8	0.769	9	9	1.8	5.09	9.58e-05	7.37	5.58e-06	0.97
chr9-417	chr9	125799522	125799664	+	4.7	0.688	intron (NM_012197, intron 13 of 25)	intron (NM_012197, intron 13 of 25)	2747	2747	NM_005294	2844	Hs.740981	NM_005294	ENSG00000188394	GPR21	GPR21	-	G protein-coupled receptor 21	protein-coding	4.7	0.688	10	10	2	4.94	5.11e-05	4.63	8.72e-05	0.97
chr16-162	chr16	57680545	57680685	+	4.8	0.769	intron (NM_001145770, intron 2 of 14)	intron (NM_001145770, intron 2 of 14)	7408	7408	NM_001145774	9289	Hs.513633	NM_001145770	ENSG00000205336	GPR56	GPR56	BFPP|TM7LN4|TM7XN1	G protein-coupled receptor 56	protein-coding	4.8	0.769	10	9	1.8	5.09	9.58e-05	6.34	1.82e-05	0.97
chr16-81	chr16	46898261	46898401	+	5.3	0.778	Intergenic	AluJr|SINE|Alu	-19977	19977	NM_133443	84706	Hs.460693	NM_001142466	ENSG00000166123	GPT2	GPT2	ALT2	glutamic pyruvate transaminase (alanine aminotransferase) 2	protein-coding	5.3	0.778	11	10	1.8	5.66	1.66e-05	6.18	7.89e-06	0.97
chr6-111	chr6	28509953	28510095	+	4.7	0.733	Intergenic	Intergenic	16235	16235	NM_001509	2880	Hs.248129	NM_001509	ENSG00000224586	GPX5	GPX5	-	glutathione peroxidase 5 (epididymal androgen-related protein)	protein-coding	4.7	0.733	11	10	2	4.94	5.11e-05	7.71	1.14e-06	0.97
chr5-6698	chr5	125413691	125413833	+	4.7	0.714	Intergenic	L1MEg1|LINE|L1	-282026	282026	NM_001146319	65983	Hs.363558	NM_001146319	ENSG00000155324	GRAMD3	GRAMD3	NS3TP2	GRAM domain containing 3	protein-coding	4.7	0.714	10	10	2	4.94	5.11e-05	9.89	1.24e-07	0.97
chr17-206	chr17	73377270	73377412	+	5.1	0.857	intron (NM_203506, intron 2 of 4)	intron (NM_203506, intron 2 of 4)	24448	24448	NM_002086	2885	Hs.708119	NM_002086	ENSG00000177885	GRB2	GRB2	ASH|EGFRBP-GRB2|Grb3-3|MST084|MSTP084|NCKAP2	growth factor receptor-bound protein 2	protein-coding	5.1	0.857	11	11	2	5.44	9.23e-06	9.55	4.16e-08	0.97
chr15-22	chr15	33160111	33160253	+	5.1	0.833	intron (NM_001103184, intron 12 of 16)	L2b|LINE|L2	149977	149977	NM_001191322	26585	Hs.40098	NM_001191322	ENSG00000166923	GREM1	GREM1	CKTSF1B1|DAND2|DRM|GREMLIN|IHG-2	gremlin 1	protein-coding	5.1	0.833	12	11	2	5.44	9.23e-06	5.97	3.91e-06	0.97
chr1-345	chr1	240928120	240928260	+	4.8	0.769	Intergenic	Intergenic	-152728	152728	NM_022469	64388	Hs.98206	NM_022469	ENSG00000180875	GREM2	GREM2	CKTSF1B2|DAND3|PRDC	gremlin 2	protein-coding	4.8	0.769	10	9	1.8	5.09	9.58e-05	5.42	6.03e-05	0.97
chr8-258	chr8	102540030	102540170	+	4.8	0.857	intron (NM_024915, intron 1 of 15)	L1M6|LINE|L1	35432	35432	NM_024915	79977	Hs.661088	NM_024915	ENSG00000083307	GRHL2	GRHL2	BOM|DFNA28|TFCP2L3	grainyhead-like 2 (Drosophila)	protein-coding	4.8	0.857	10	9	1.8	5.09	9.58e-05	6.09	2.46e-05	0.97
chr9-135	chr9	37421189	37421331	+	5.1	0.611	Intergenic	L1MC4a|LINE|L1	-1447	1447	NM_012203	9380	Hs.731459	NM_012203	ENSG00000137106	GRHPR	GRHPR	GLXR|GLYD|PH2	glyoxylate reductase/hydroxypyruvate reductase	protein-coding	5.1	0.611	11	11	2.4	4.55	4.58e-05	6.26	2.49e-06	0.97
chr5-3419	chr5	152975365	152975505	+	5.3	0.786	intron (NM_001258020, intron 3 of 16)	intron (NM_001258020, intron 3 of 16)	103703	103703	NM_001258022	2890	Hs.737709	NM_000827	ENSG00000155511	GRIA1	GRIA1	GLUH1|GLUR1|GLURA|GluA1|HBGR1	glutamate receptor, ionotropic, AMPA 1	protein-coding	5.3	0.786	10	10	1.8	5.66	1.66e-05	6.52	4.96e-06	0.97
chrX-298	chrX	121908789	121908929	+	4.8	0.692	Intergenic	L1M4|LINE|L1	-409237	409237	NM_000828	2892	Hs.377070	NM_000828	ENSG00000125675	GRIA3	GRIA3	GLUR-C|GLUR-K3|GLUR3|GLURC|GluA3|MRX94	glutamate receptor, ionotropic, AMPA 3	protein-coding	4.8	0.692	9	9	1.8	5.09	9.58e-05	7.55	4.63e-06	0.97
chr21-46	chr21	31221269	31221409	+	5.3	0.769	intron (NM_175611, intron 1 of 15)	L2b|LINE|L2	90943	90943	NM_000830	2897	Hs.664641	NM_000830	ENSG00000171189	GRIK1	GRIK1	EAA3|EEA3|GLR5|GLUR5|GluK1	glutamate receptor, ionotropic, kainate 1	protein-coding	5.3	0.769	10	10	1.8	5.66	1.66e-05	8.19	6.73e-07	0.97
chr6-130	chr6	102119026	102119168	+	5.1	0.75	intron (NM_001166247, intron 3 of 16)	Charlie1b|DNA|hAT-Charlie	272236	272236	NM_021956	2898	Hs.98262	NM_001166247	ENSG00000164418	GRIK2	GRIK2	EAA4|GLR6|GLUK6|GLUR6|GluK2|MRT6	glutamate receptor, ionotropic, kainate 2	protein-coding	5.1	0.75	11	11	2	5.44	9.23e-06	6.16	2.91e-06	0.97
chr5-3547	chr5	148724649	148724791	+	5.1	0.684	promoter-TSS (NM_152407)	promoter-TSS (NM_152407)	-257	257	NM_152407	134266	Hs.511816	NM_152407	ENSG00000164284	GRPEL2	GRPEL2	Mt-GrpE#2	GrpE-like 2, mitochondrial (E. coli)	protein-coding	5.1	0.684	11	11	2	5.44	9.23e-06	5.19	1.4e-05	0.97
chr4-95	chr4	43136881	43137021	+	4.8	0.75	Intergenic	Intergenic	241668	241668	NM_001080476	389207	Hs.162559	NM_001080476	ENSG00000215203	GRXCR1	GRXCR1	DFNB25	glutaredoxin, cysteine rich 1	protein-coding	4.8	0.75	10	9	1.8	5.09	9.58e-05	6.53	1.43e-05	0.97
chr5-3392	chr5	145241794	145241934	+	5.3	0.875	intron (NM_001080516, intron 2 of 2)	intron (NM_001080516, intron 2 of 2)	10667	10667	NM_001080516	643226	Hs.570895	NM_001080516	ENSG00000204928	GRXCR2	GRXCR2	-	glutaredoxin, cysteine rich 2	protein-coding	5.3	0.875	10	10	1.8	5.66	1.66e-05	7.41	1.62e-06	0.97
chr8-229	chr8	130738540	130738680	+	5.8	0.688	Intergenic	Intergenic	60524	60524	NM_031415	56169	Hs.133244	NM_031415	ENSG00000147697	GSDMC	GSDMC	MLZE	gasdermin C	protein-coding	5.8	0.688	11	11	1.8	6.22	2.63e-06	8.51	1.29e-07	0.97
chr16-520	chr16	85591214	85591354	+	4.8	0.667	Intergenic	Intergenic	-53745	53745	NM_001134473	23199	Hs.461647	NM_001134473	ENSG00000131149	GSE1	GSE1	KIAA0182	Gse1 coiled-coil protein homolog (mouse)	protein-coding	4.8	0.667	9	9	1.8	5.09	9.58e-05	6.34	1.82e-05	0.97
chr12-23	chr12	13253372	13253514	+	4.7	0.579	intron (NM_001080554, intron 1 of 6)	intron (NM_001080554, intron 1 of 6)	3187	3187	NM_001080555	83445	Hs.240053	NM_001080554	ENSG00000111305	GSG1	GSG1	-	germ cell associated 1	protein-coding	4.7	0.579	11	10	2	4.94	5.11e-05	4.66	8.27e-05	0.97
chr3-39	chr3	119808641	119808781	+	5.8	0.846	intron (NM_001146156, intron 1 of 10)	intron (NM_001146156, intron 1 of 10)	4553	4553	NM_001146156	2932	Hs.445733	NM_001146156	ENSG00000082701	GSK3B	GSK3B	-	glycogen synthase kinase 3 beta	protein-coding	5.8	0.846	11	11	2	5.53	7.92e-06	7.45	4.74e-07	0.97
chr2-79	chr2	145117081	145117223	+	6.1	0.867	Intergenic	Intergenic	-27069	27069	NM_001164629	79712	Hs.724213	NM_001006636	ENSG00000121964	GTDC1	GTDC1	Hmat-Xa|mat-Xa	glycosyltransferase-like domain containing 1	protein-coding	6.1	0.867	13	13	2	6.43	2.36e-07	12.85	7.31e-11	0.96
chr11-73	chr11	18344918	18345058	+	5.3	0.769	intron (NM_005316, intron 1 of 14)	FRAM|SINE|Alu	1172	1172	NM_005316	2965	Hs.577202	NM_001142307	ENSG00000110768	GTF2H1	GTF2H1	BTF2|TFB1|TFIIH	general transcription factor IIH, polypeptide 1, 62kDa	protein-coding	5.3	0.769	10	10	1.8	5.66	1.66e-05	7.11	2.33e-06	0.97
chr20-172	chr20	60758394	60758534	+	5.8	0.867	TTS (NM_198935)	TTS (NM_198935)	383	383	NM_015666	26164	Hs.340636	NM_015666	ENSG00000101181	GTPBP5	GTPBP5	ObgH1|dJ1005F21.2	GTP binding protein 5 (putative)	protein-coding	5.8	0.867	11	11	1.8	6.22	2.63e-06	5.06	1.77e-05	0.97
chr20-274	chr20	42335983	42336125	+	5.1	0.706	intron (NM_002466, intron 9 of 13)	intron (NM_002466, intron 9 of 13)	19588	19588	NM_001008901	149699	Hs.710523	NM_001008901	ENSG00000124196	GTSF1L	GTSF1L	C20orf65|FAM112A|dJ1028D15.4	gametocyte specific factor 1-like	protein-coding	5.1	0.706	11	11	2	5.44	9.23e-06	8.04	2.26e-07	0.97
chrX-238	chrX	108583146	108583286	+	4.8	0.667	Intergenic	L1MA3|LINE|L1	142069	142069	NM_001522	2986	Hs.123074	NM_001522	ENSG00000101890	GUCY2F	GUCY2F	CYGF|GC-F|GUC2DL|GUC2F|RETGC-2|ROS-GC2	guanylate cyclase 2F, retinal	protein-coding	4.8	0.667	9	9	1.8	5.09	9.58e-05	6.4	1.68e-05	0.97
chr5-330	chr5	21623050	21623192	+	6.6	0.727	Intergenic	MER4B-int|LTR|ERV1	163532	163532	NR_027028	728411	Hs.88181	NM_207331		GUSBP1	GUSBP1	-	glucuronidase, beta pseudogene 1	pseudo	6.6	0.727	14	14	2	6.92	3.37e-08	4.93	1.81e-06	0.96
chr1-653	chr1	226252290	226252432	+	4.7	0.846	intron (NR_002315, intron 2 of 3)	intron (NR_002315, intron 2 of 3)	1933	1933	NR_002315	440926	Hs.533624	NR_002315		H3F3AP4	H3F3AP4	p13	H3 histone, family 3A, pseudogene 4	pseudo	4.7	0.846	10	10	2	4.94	5.11e-05	4.99	4.69e-05	0.97
chr2-226	chr2	43213949	43214091	+	4.7	0.667	Intergenic	L1ME1|LINE|L1	-194269	194269	NM_012205	23498	Hs.368805	NM_012205	ENSG00000162882	HAAO	HAAO	3-HAO|HAO	3-hydroxyanthranilate 3,4-dioxygenase	protein-coding	4.7	0.667	10	10	2	4.94	5.11e-05	8.68	4.01e-07	0.97
chr2-209	chr2	26496369	26496511	+	4.7	0.714	intron (NM_000183, intron 5 of 15)	intron (NM_000183, intron 5 of 15)	28824	28824	NM_000183	3032	Hs.515848	NM_000183	ENSG00000138029	HADHB	HADHB	ECHB|MTPB|TP-BETA	hydroxyacyl-CoA dehydrogenase/3-ketoacyl-CoA thiolase/enoyl-CoA hydratase (trifunctional protein), beta subunit	protein-coding	4.7	0.714	10	10	2	4.94	5.11e-05	5.83	1.28e-05	0.97
chr4-395	chr4	174401900	174402040	+	4.8	0.75	Intergenic	L1ME2z|LINE|L1	49408	49408	NM_021973	9464	Hs.388245	NM_021973	ENSG00000164107	HAND2	HAND2	DHAND2|Hed|Thing2|bHLHa26|dHand	heart and neural crest derivatives expressed 2	protein-coding	4.8	0.75	9	9	1.8	5.09	9.58e-05	10.18	3.74e-07	0.97
chr20-178	chr20	7351778	7351918	+	4.8	0.833	Intergenic	MER20B|DNA|hAT-Charlie	569245	569245	NM_017545	54363	Hs.193640	NM_017545	ENSG00000101323	HAO1	HAO1	GOX|GOX1|HAOX1	hydroxyacid oxidase (glycolate oxidase) 1	protein-coding	4.8	0.833	10	9	1.8	5.09	9.58e-05	7.64	4.21e-06	0.97
chr8-13	chr8	122723395	122723535	+	6.9	0.727	Intergenic	Intergenic	-69835	69835	NM_005328	3037	Hs.159226	NM_005328	ENSG00000170961	HAS2	HAS2	-	hyaluronan synthase 2	protein-coding	6.9	0.727	14	13	2.7	4.9	4.48e-06	5.26	2.1e-06	0.96
chr8-74	chr8	122463018	122463158	+	6.3	0.882	Intergenic	Intergenic	-188498	188498	NR_002835	594842	Hs.668686	NR_002835		HAS2-AS1	HAS2-AS1	HAS2-AS|HAS2AS|HASNT|NCRNA00077	HAS2 antisense RNA 1	miscRNA	6.3	0.882	12	12	1.8	6.79	3.83e-07	5.22	5.56e-06	0.96
chr16-410	chr16	69151799	69151939	+	4.8	0.692	TTS (NM_005329)	TTS (NM_005329)	10426	10426	NM_005329	3038	Hs.592069	NM_001199280	ENSG00000103044	HAS3	HAS3	-	hyaluronan synthase 3	protein-coding	4.8	0.692	9	9	1.8	5.09	9.58e-05	6.09	2.46e-05	0.97
chr19-29	chr19	17185673	17185815	+	5.1	0.7	promoter-TSS (NM_001130065)	promoter-TSS (NM_001130065)	599	599	NM_001011699	93323	Hs.404088	NM_001011699	ENSG00000131351	HAUS8	HAUS8	DGT4|HICE1|NY-SAR-48	HAUS augmin-like complex, subunit 8	protein-coding	5.1	0.7	11	11	2	5.44	9.23e-06	9.2	6e-08	0.97
chr6-134	chr6	135376212	135376354	+	5.1	0.933	promoter-TSS (NM_006620)	promoter-TSS (NM_006620)	-247	247	NM_006620	10767	Hs.378532	NM_001145158	ENSG00000112339	HBS1L	HBS1L	EF-1a|ERFS|HBS1|HSPC276	HBS1-like (S. cerevisiae)	protein-coding	5.1	0.933	11	11	2	5.44	9.23e-06	6.94	9.34e-07	0.97
chr5-29	chr5	45644249	45644389	+	7.9	0.762	intron (NM_021072, intron 2 of 7)	intron (NM_021072, intron 2 of 7)	51901	51901	NM_021072	348980	Hs.353176	NM_021072	ENSG00000164588	HCN1	HCN1	BCNG-1|BCNG1|HAC-2	hyperpolarization activated cyclic nucleotide-gated potassium channel 1	protein-coding	7.9	0.762	16	15	1.8	8.49	7.52e-10	5.9	8.52e-08	0.95
chr7-104	chr7	18241909	18242049	+	4.8	0.714	intron (NM_001204144, intron 2 of 12)	intron (NM_001204144, intron 2 of 12)	115407	115407	NM_001204144	9734	Hs.196054	NM_001204144	ENSG00000048052	HDAC9	HDAC9	HD7|HD7b|HD9|HDAC|HDAC7|HDAC7B|HDAC9B|HDAC9FL|HDRP|MITR	histone deacetylase 9	protein-coding	4.8	0.714	10	9	1.8	5.09	9.58e-05	8.45	1.87e-06	0.97
chrX-26	chrX	83901077	83901217	+	5.3	0.688	Intergenic	Intergenic	-143660	143660	NM_001177478	139324	Hs.559546	NM_001177478	ENSG00000165259	HDX	HDX	CXorf43|D030011N01Rik	highly divergent homeobox	protein-coding	5.3	0.688	11	10	1.8	5.66	1.66e-05	8.59	4.4e-07	0.97
chr1-141	chr1	236767493	236767635	+	5.1	0.706	intron (NM_018072, intron 1 of 44)	CpG-2381	277	277	NM_018072	55127	Hs.708114	NM_018072	ENSG00000119285	HEATR1	HEATR1	BAP28|UTP10	HEAT repeat containing 1	protein-coding	5.1	0.706	12	11	2.4	4.55	4.58e-05	5.16	1.49e-05	0.97
chr14-712	chr14	31871556	31871698	+	4.7	0.706	intron (NM_015473, intron 2 of 35)	intron (NM_015473, intron 2 of 35)	18161	18161	NM_015473	25938	Hs.370299	NM_015473	ENSG00000129493	HEATR5A	HEATR5A	C14orf125	HEAT repeat containing 5A	protein-coding	4.7	0.706	10	10	2	4.94	5.11e-05	4.85	5.92e-05	0.97
chr10-174	chr10	93150017	93150157	+	4.8	0.769	intron (NR_024467, intron 3 of 4)	intron (NR_024467, intron 3 of 4)	-20009	20009	NM_173497	143279	Hs.596096	NM_173497	ENSG00000165338	HECTD2	HECTD2	-	HECT domain containing E3 ubiquitin protein ligase 2	protein-coding	4.8	0.769	9	9	1.8	5.09	9.58e-05	7.92	3.14e-06	0.97
chr20-407	chr20	62214702	62214842	+	4.8	0.833	Intergenic	L1ME1|LINE|L1	-9180	9180	NM_001037335	85441	Hs.517180	NM_001037335	ENSG00000130589	HELZ2	HELZ2	PDIP-1|PRIC285	helicase with zinc finger 2, transcriptional coactivator	protein-coding	4.8	0.833	10	9	1.8	5.09	9.58e-05	8.93	1.2e-06	0.97
chr15-3	chr15	20610282	20610422	+	6.9	0.737	Intergenic	L1ME3A|LINE|L1	101081	101081	NR_036432	283755	Hs.608918	NM_001024682		HERC2P3	HERC2P3	D15F37S4	hect domain and RLD 2 pseudogene 3	pseudo	6.9	0.737	13	13	3.3	3.92	4.45e-05	7.89	2.3e-08	0.96
chr10-137	chr10	69843123	69843265	+	4.7	0.722	Intergenic	Intergenic	-8091	8091	NM_022079	26091	Hs.51891	NM_001017972	ENSG00000148634	HERC4	HERC4	-	HECT and RLD domain containing E3 ubiquitin protein ligase 4	protein-coding	4.7	0.722	10	10	2	4.94	5.11e-05	5.98	1.03e-05	0.97
chr4-109	chr4	89273206	89273348	+	5.1	0.824	Intergenic	LTR49|LTR|ERV1	-26614	26614	NM_001165136	55008	Hs.529317	NM_001013000	ENSG00000138642	HERC6	HERC6	-	HECT and RLD domain containing E3 ubiquitin protein ligase family member 6	protein-coding	5.1	0.824	11	11	2	5.44	9.23e-06	9.55	4.16e-08	0.97
chr7-224	chr7	35766622	35766762	+	4.8	0.714	Intergenic	Intergenic	-31920	31920	NM_022373	64224	Hs.643051	NM_022373	ENSG00000122557	HERPUD2	HERPUD2	-	HERPUD family member 2	protein-coding	4.8	0.714	9	9	1.8	5.09	9.58e-05	9.75	5.32e-07	0.97
chr3-143	chr3	193788389	193788529	+	5.3	0.769	Intergenic	Intergenic	-65472	65472	NM_005524	3280	Hs.250666	NM_005524	ENSG00000114315	HES1	HES1	HES-1|HHL|HRY|bHLHb39	hairy and enhancer of split 1, (Drosophila)	protein-coding	5.3	0.769	10	10	2	5.03	4.45e-05	7.83	1.01e-06	0.97
chr17-178	chr17	43243927	43244069	+	5.1	0.917	intron (NM_144608, intron 3 of 3)	L2c|LINE|L2	5734	5734	NM_144608	124790	Hs.56382	NM_144608	ENSG00000168517	HEXIM2	HEXIM2	-	hexamethylene bis-acetamide inducible 2	protein-coding	5.1	0.917	11	11	2	5.44	9.23e-06	7.71	3.38e-07	0.97
chr1-240	chr1	210501577	210501719	+	5.1	0.867	promoter-TSS (NM_001122834)	promoter-TSS (NM_001122834)	52	52	NM_001122834	55733	Hs.58650	NM_001122834	ENSG00000054392	HHAT	HHAT	MART2|SKI1|Skn	hedgehog acyltransferase	protein-coding	5.1	0.867	11	11	2.4	4.55	4.58e-05	5.7	5.99e-06	0.97
chr4-69	chr4	145617004	145617144	+	5.3	0.917	intron (NM_022475, intron 4 of 12)	intron (NM_022475, intron 4 of 12)	-49903	49903	NR_037595	646576	Hs.632595	NR_037595		HHIP-AS1	HHIP-AS1	-	HHIP antisense RNA 1	miscRNA	5.3	0.917	11	10	1.8	5.66	1.66e-05	10.84	4.91e-08	0.97
chr1-736	chr1	222475474	222475614	+	4.8	0.667	Intergenic	Intergenic	245900	245900	NM_024746	79802	Hs.665660	NM_024746	ENSG00000143512	HHIPL2	HHIPL2	KIAA1822L	HHIP-like 2	protein-coding	4.8	0.667	9	9	1.8	5.09	9.58e-05	7.92	3.14e-06	0.97
chr14-80	chr14	62161283	62161425	+	6.1	0.64	promoter-TSS (NM_001530)	promoter-TSS (NM_001530)	-765	765	NM_181054	3091	Hs.719495	NM_001243084	ENSG00000100644	HIF1A	HIF1A	HIF-1A|HIF-1alpha|HIF1|HIF1-ALPHA|MOP1|PASD8|bHLHe78	hypoxia inducible factor 1, alpha subunit (basic helix-loop-helix transcription factor)	protein-coding	6.1	0.64	14	13	3.2	4.03	3.35e-05	3.74	7.01e-05	0.96
chr3-179	chr3	42845748	42845888	+	4.8	0.769	5' UTR (NM_001099668, exon 1 of 4)	5' UTR (NM_001099668, exon 1 of 4)	116	116	NM_001099668	25994	Hs.728813	NM_001099668	ENSG00000181061	HIGD1A	HIGD1A	HIG1	HIG1 hypoxia inducible domain family, member 1A	protein-coding	4.8	0.769	9	9	1.8	5.09	9.58e-05	7.37	5.58e-06	0.97
chr17-370	chr17	42942969	42943111	+	4.7	0.667	intron (NM_001258353, intron 13 of 27)	intron (NM_001258353, intron 13 of 27)	17761	17761	NM_016438	51751	Hs.287963	NM_016438	ENSG00000131097	HIGD1B	HIGD1B	CLST11240|CLST11240-15	HIG1 hypoxia inducible domain family, member 1B	protein-coding	4.7	0.667	10	10	2	4.94	5.11e-05	5.1	3.92e-05	0.97
chr7-328	chr7	128079992	128080134	+	4.7	0.923	Intergenic	Intergenic	-15821	15821	NM_013332	29923	Hs.706124	NM_001098786	ENSG00000135245	HILPDA	HILPDA	C7orf68|HIG-2|HIG2	hypoxia inducible lipid droplet-associated	protein-coding	4.7	0.923	10	10	2	4.94	5.11e-05	7.39	1.68e-06	0.97
chr17-68	chr17	48256393	48256533	+	5.3	0.786	Intergenic	MER33|DNA|hAT-Charlie	-6626	6626	NR_024193	373861	Hs.25934	NR_024192		HILS1	HILS1	-	histone linker H1 domain, spermatid-specific 1, pseudogene	pseudo	5.3	0.786	11	10	1.8	5.66	1.66e-05	8.49	4.9e-07	0.97
chr7-334	chr7	139433774	139433916	+	4.7	0.833	intron (NM_022740, intron 1 of 14)	intron (NM_022740, intron 1 of 14)	43848	43848	NM_022740	28996	Hs.731417	NM_001113239	ENSG00000064393	HIPK2	HIPK2	PRO0593	homeodomain interacting protein kinase 2	protein-coding	4.7	0.833	10	10	2	4.94	5.11e-05	8.17	6.89e-07	0.97
chr6-218	chr6	26126595	26126735	+	4.8	0.643	Intergenic	Intergenic	2292	2292	NM_003512	8334	Hs.484950	NM_003512	ENSG00000180573	HIST1H2AC	HIST1H2AC	H2A/l|H2AFL|dJ221C16.4	histone cluster 1, H2ac	protein-coding	4.8	0.643	9	9	1.8	5.09	9.58e-05	7.46	5.08e-06	0.97
chr6-63	chr6	26217892	26218034	+	5.6	0.875	TTS (NM_021052)	TTS (NM_021052)	815	815	NM_021052	3012	Hs.121017	NM_021052	ENSG00000168274	HIST1H2AE	HIST1H2AE	H2A.1|H2A.2|H2A/a|H2AFA	histone cluster 1, H2ae	protein-coding	5.6	0.875	12	12	2	5.93	1.53e-06	7.79	9.1e-08	0.96
chr6-219	chr6	26171750	26171890	+	4.8	0.818	TTS (NM_138720)	TTS (NM_138720)	-12204	12204	NM_003523	8344	Hs.534369	NM_003523	ENSG00000197697	HIST1H2BE	HIST1H2BE	H2B.h|H2B/h|H2BFH|dJ221C16.8	histone cluster 1, H2be	protein-coding	4.8	0.818	9	9	1.8	5.09	9.58e-05	6.82	1.03e-05	0.97
chr6-50	chr6	27870505	27870645	+	5.8	0.786	Intergenic	Intergenic	9372	9372	NM_003527	8348	Hs.484991	NM_003527	ENSG00000196331	HIST1H2BO	HIST1H2BO	H2B.2|H2B/n|H2BFN|dJ193B12.2	histone cluster 1, H2bo	protein-coding	5.8	0.786	11	11	1.8	6.22	2.63e-06	11.23	7.51e-09	0.97
chr6-109	chr6	26225261	26225403	+	5.1	0.917	promoter-TSS (NM_003532)	promoter-TSS (NM_003532)	-51	51	NM_003532	8353	Hs.586261	NM_003532	ENSG00000196966	HIST1H3E	HIST1H3E	H3.1|H3/d|H3FD	histone cluster 1, H3e	protein-coding	5.1	0.917	11	11	2	5.44	9.23e-06	8.98	7.59e-08	0.97
chr6-108	chr6	26205880	26206022	+	5.1	0.8	TTS (NM_003545)	TTS (NM_003545)	1078	1078	NM_003545	8367	Hs.662174	NM_003545	ENSG00000198518	HIST1H4E	HIST1H4E	H4/j|H4FJ	histone cluster 1, H4e	protein-coding	5.1	0.8	11	11	2.4	4.55	4.58e-05	9.92	2.84e-08	0.97
chr6-140	chr6	143218597	143218737	+	5.3	0.667	intron (NM_006734, intron 1 of 9)	L1ME3A|LINE|L1	47671	47671	NM_006734	3097	Hs.510172	NM_006734	ENSG00000010818	HIVEP2	HIVEP2	HIV-EP2|MBP-2|MIBP1|SHN2|ZAS2|ZNF40B	human immunodeficiency virus type I enhancer binding protein 2	protein-coding	5.3	0.667	10	10	1.8	5.66	1.66e-05	5.34	2.72e-05	0.97
chr1-358	chr1	42386216	42386358	+	4.7	0.833	intron (NR_038261, intron 1 of 3)	intron (NR_038261, intron 1 of 3)	-1791	1791	NR_038260	59269	Hs.648369	NM_001127714	ENSG00000127124	HIVEP3	HIVEP3	KBP-1|KBP1|KRC|SHN3|Schnurri-3|ZAS3|ZNF40C	human immunodeficiency virus type I enhancer binding protein 3	protein-coding	4.7	0.833	10	10	2	4.94	5.11e-05	8.17	6.89e-07	0.97
chr21-86	chr21	38337696	38337838	+	4.7	0.688	intron (NM_000411, intron 1 of 11)	MIRc|SINE|MIR	1189	1189	NM_001242784	3141	Hs.732538	NM_000411	ENSG00000159267	HLCS	HLCS	HCS	holocarboxylase synthetase (biotin-(proprionyl-CoA-carboxylase (ATP-hydrolysing)) ligase)	protein-coding	4.7	0.688	10	10	2	4.94	5.11e-05	7.89	9.38e-07	0.97
chr1-111	chr1	221144760	221144900	+	5.8	0.846	Intergenic	HAL1|LINE|L1	92087	92087	NM_021958	3142	Hs.74870	NM_021958	ENSG00000136630	HLX	HLX	HB24|HLX1	H2.0-like homeobox	protein-coding	5.8	0.846	11	11	2	5.53	7.92e-06	9.01	7.4e-08	0.97
chr5-141	chr5	43312252	43312392	+	7.4	0.64	intron (NM_001098272, intron 1 of 10)	intron (NM_001098272, intron 1 of 10)	1292	1292	NM_002130	3157	Hs.741287	NM_001098272	ENSG00000112972	HMGCS1	HMGCS1	HMGCS	3-hydroxy-3-methylglutaryl-CoA synthase 1 (soluble)	protein-coding	7.4	0.64	14	14	4	3.52	7.23e-05	4.36	7.21e-06	0.95
chr6-222	chr6	26552872	26553012	+	4.8	0.9	Intergenic	Intergenic	14370	14370	NM_006353	10473	Hs.236774	NM_006353	ENSG00000182952	HMGN4	HMGN4	HMG17L3|NHC	high mobility group nucleosomal binding domain 4	protein-coding	4.8	0.9	9	9	1.8	5.09	9.58e-05	6.74	1.12e-05	0.97
chr5-3412	chr5	149374630	149374770	+	4.8	0.769	exon (NM_001243253, exon 2 of 2)	exon (NM_001243253, exon 2 of 2)	-5469	5469	NM_014983	22993	Hs.719189	NM_014983	ENSG00000113716	HMGXB3	HMGXB3	HMGX3|SMF	HMG box domain containing 3	protein-coding	4.8	0.769	10	9	1.8	5.09	9.58e-05	5.56	4.95e-05	0.97
chr5-6717	chr5	143300939	143301081	+	4.7	0.909	Intergenic	Intergenic	109284	109284	NM_021182	57824	Hs.158320	NM_021182	ENSG00000158497	HMHB1	HMHB1	HB-1|HLA-HB1	histocompatibility (minor) HB-1	protein-coding	4.7	0.909	10	10	2	4.94	5.11e-05	6.31	6.57e-06	0.97
chr16-238	chr16	4544971	4545111	+	4.8	0.818	promoter-TSS (NM_001127205)	promoter-TSS (NM_001127205)	-818	818	NM_001127205	3163	Hs.284279	NM_001127204	ENSG00000103415	HMOX2	HMOX2	HO-2	heme oxygenase (decycling) 2	protein-coding	4.8	0.818	9	9	1.8	5.09	9.58e-05	5.71	4.05e-05	0.97
chr5-145	chr5	173745896	173746036	+	6.3	0.875	Intergenic	L1M5|LINE|L1	273359	273359	NM_015980	51617	Hs.559412	NM_015980	ENSG00000170091	HMP19	HMP19	-	HMP19 protein	protein-coding	6.3	0.875	14	12	1.8	6.79	3.83e-07	9.39	1.22e-08	0.96
chr2-192	chr2	138347800	138347940	+	4.8	0.846	intron (NM_001080427, intron 16 of 26)	intron (NM_001080427, intron 16 of 26)	-373938	373938	NM_006895	3176	Hs.42151	NM_001024074	ENSG00000150540	HNMT	HNMT	HMT|HNMT-S1|HNMT-S2	histamine N-methyltransferase	protein-coding	4.8	0.846	10	9	1.8	5.09	9.58e-05	10.18	3.74e-07	0.97
chr2-508	chr2	178053631	178053771	+	4.8	0.643	Intergenic	Intergenic	-23721	23721	NM_194247	220988	Hs.516539	NM_194247	ENSG00000170144	HNRNPA3	HNRNPA3	2610510D13Rik|D10S102|FBRNP|HNRPA3	heterogeneous nuclear ribonucleoprotein A3	protein-coding	4.8	0.643	9	9	1.8	5.09	9.58e-05	8.13	2.56e-06	0.97
chr5-1808	chr5	179042442	179042584	+	5.1	0.565	intron (NM_005520, intron 13 of 13)	intron (NM_005520, intron 13 of 13)	8198	8198	NM_001257293	3187	Hs.604001	NM_001257293	ENSG00000169045	HNRNPH1	HNRNPH1	HNRPH|HNRPH1|hnRNPH	heterogeneous nuclear ribonucleoprotein H1 (H)	protein-coding	5.1	0.565	12	11	2.4	4.55	4.58e-05	4.99	2.01e-05	0.97
chr1-22	chr1	23640120	23640262	+	6.1	0.75	exon (NM_005826, exon 9 of 11)	exon (NM_005826, exon 9 of 11)	30662	30662	NM_001102398	10236	Hs.373763	NM_001102397	ENSG00000125944	HNRNPR	HNRNPR	HNRPR|hnRNP R|hnRNP-R	heterogeneous nuclear ribonucleoprotein R	protein-coding	6.1	0.75	14	13	2.4	5.38	1.66e-06	9.92	1.61e-09	0.96
chr22-7	chr22	30523803	30523945	+	4.7	0.923	intron (NM_152510, intron 10 of 10)	L2|LINE|L2	47421	47421	NM_152510	150280	Hs.120391	NM_152510	ENSG00000176635	HORMAD2	HORMAD2	-	HORMA domain containing 2	protein-coding	4.7	0.923	11	10	2	4.94	5.11e-05	8.07	7.65e-07	0.97
chr7-55	chr7	27121008	27121148	+	5.3	0.812	Intergenic	Intergenic	14547	14547	NM_005522	3198	Hs.67397	NM_005522	ENSG00000105991	HOXA1	HOXA1	BSAS|HOX1|HOX1F	homeobox A1	protein-coding	5.3	0.812	11	10	2	5.03	4.45e-05	10.06	9.6e-08	0.97
chr7-176	chr7	27173784	27173926	+	4.7	0.733	Intergenic	Intergenic	-3456	3456	NM_002141	3201	Hs.721126	NM_002141	ENSG00000197576	HOXA4	HOXA4	HOX1|HOX1D	homeobox A4	protein-coding	4.7	0.733	10	10	2	4.94	5.11e-05	5.88	1.2e-05	0.97
chr17-383	chr17	46619602	46619744	+	4.7	0.688	TTS (NM_002145)	TTS (NM_002145)	2720	2720	NM_002145	3212	Hs.514289	NM_002145	ENSG00000173917	HOXB2	HOXB2	HOX2|HOX2H|Hox-2.8|K8	homeobox B2	protein-coding	4.7	0.688	10	10	2	4.94	5.11e-05	5.18	3.47e-05	0.97
chr17-148	chr17	46684845	46684985	+	5.3	0.833	3' UTR (NM_004502, exon 2 of 2)	3' UTR (NM_004502, exon 2 of 2)	-2581	2581	NM_018952	3216	Hs.98428	NM_018952	ENSG00000108511	HOXB6	HOXB6	HOX2|HOX2B|HU-2|Hox-2.2	homeobox B6	protein-coding	5.3	0.833	10	10	1.8	5.66	1.66e-05	5.63	1.72e-05	0.97
chr2-506	chr2	177064685	177064825	+	4.8	0.625	Intergenic	Intergenic	-11069	11069	NR_033979	401022	Hs.98661	NR_033979		HOXD-AS1	HOXD-AS1	-	HOXD cluster antisense RNA 1	miscRNA	4.8	0.625	9	9	1.8	5.09	9.58e-05	10.18	3.74e-07	0.97
chr1-372	chr1	21191471	21191611	+	4.8	0.833	intron (NM_001198802, intron 19 of 34)	intron (NM_001198802, intron 19 of 34)	-78360	78360	NM_016287	50809	Hs.142442	NM_016287	ENSG00000127483	HP1BP3	HP1BP3	HP1-BP74	heterochromatin protein 1, binding protein 3	protein-coding	4.8	0.833	9	9	1.8	5.09	9.58e-05	6.97	8.71e-06	0.97
chr10-186	chr10	100293626	100293766	+	4.8	0.714	intron (NM_001166244, intron 8 of 10)	intron (NM_001166244, intron 8 of 10)	-86992	86992	NM_000195	3257	Hs.404568	NM_000195	ENSG00000107521	HPS1	HPS1	HPS	Hermansky-Pudlak syndrome 1	protein-coding	4.8	0.714	9	9	1.8	5.09	9.58e-05	9.19	8.6e-07	0.97
chr10-113	chr10	101005956	101006096	+	5.3	0.917	Intergenic	L2c|LINE|L2	-10394	10394	NM_001166245	60495	Hs.689544	NM_001166244	ENSG00000172987	HPSE2	HPSE2	HPA2|HPR2|UFS	heparanase 2	protein-coding	5.3	0.917	10	10	1.8	5.66	1.66e-05	11.32	3.31e-08	0.97
chr7-237	chr7	54248261	54248401	+	4.8	0.818	Intergenic	Intergenic	21783	21783	NR_004422	3262	Hs.742598	NR_004422		HPVC1	HPVC1	HPV18E5L|PE5L	human papillomavirus (type 18) E5 central sequence-like 1	miscRNA	4.8	0.818	9	9	1.8	5.09	9.58e-05	6.97	8.71e-06	0.97
chr3-123	chr3	11181347	11181489	+	4.7	0.769	intron (NM_001098213, intron 1 of 1)	L1MB7|LINE|L1	2639	2639	NM_001098213	3269	Hs.1570	NM_000861	ENSG00000196639	HRH1	HRH1	H1-R|hisH1	histamine receptor H1	protein-coding	4.7	0.769	10	10	2	4.94	5.11e-05	6.87	3.14e-06	0.97
chr4-180	chr4	11636715	11636855	+	4.8	0.769	Intergenic	MLT1B|LTR|ERVL-MaLR	-206248	206248	NM_005114	9957	Hs.605349	NM_005114	ENSG00000002587	HS3ST1	HS3ST1	3OST|3OST1	heparan sulfate (glucosamine) 3-O-sulfotransferase 1	protein-coding	4.8	0.769	9	9	1.8	5.09	9.58e-05	5.37	6.43e-05	0.97
chr16-245	chr16	22950653	22950793	+	4.8	0.818	Intergenic	Intergenic	124863	124863	NM_006043	9956	Hs.733610	NM_006043	ENSG00000122254	HS3ST2	HS3ST2	30ST2|3OST2	heparan sulfate (glucosamine) 3-O-sulfotransferase 2	protein-coding	4.8	0.818	9	9	1.8	5.09	9.58e-05	7.04	7.98e-06	0.97
chr6-261	chr6	114702429	114702571	+	4.7	0.846	Intergenic	Intergenic	-318459	318459	NM_153612	222537	Hs.645477	NM_153612	ENSG00000249853	HS3ST5	HS3ST5	3-OST-5|3OST5|HS3OST5|NBLA04021	heparan sulfate (glucosamine) 3-O-sulfotransferase 5	protein-coding	4.7	0.846	10	10	2	4.94	5.11e-05	8.68	4.01e-07	0.97
chr16-97	chr16	83836161	83836303	+	5.1	0.722	Intergenic	Intergenic	-5276	5276	NM_001537	3281	Hs.250899	NM_001537	ENSG00000230989	HSBP1	HSBP1	NPC-A-13	heat shock factor binding protein 1	protein-coding	5.1	0.722	12	11	2.4	4.55	4.58e-05	4.93	2.26e-05	0.97
chr16-227	chr16	84175285	84175425	+	5.3	0.769	intron (NM_031463, intron 1 of 5)	L1M5|LINE|L1	3445	3445	NM_001146051	83693	Hs.555992	NM_001146051	ENSG00000103160	HSDL1	HSDL1	SDR12C3	hydroxysteroid dehydrogenase like 1	protein-coding	5.3	0.769	10	10	1.8	5.66	1.66e-05	6.4	5.81e-06	0.97
chr4-82	chr4	190519957	190520099	+	5.1	0.684	Intergenic	Intergenic	125729	125729	NR_036692	3323	Hs.553481	NR_036692		HSP90AA4P	HSP90AA4P	HSP90Ad|HSPCAL2	heat shock protein 90kDa alpha (cytosolic), class A member 4, pseudogene	pseudo	5.1	0.684	12	11	2.4	4.55	4.58e-05	4.47	5.41e-05	0.97
chr6-238	chr6	44217571	44217711	+	4.8	0.818	intron (NM_007355, intron 4 of 11)	intron (NM_007355, intron 4 of 11)	2792	2792	NM_007355	3326	Hs.509736	NM_007355	ENSG00000096384	HSP90AB1	HSP90AB1	D6S182|HSP84|HSP90-BETA|HSP90B|HSPC2|HSPCB	heat shock protein 90kDa alpha (cytosolic), class B member 1	protein-coding	4.8	0.818	9	9	1.8	5.09	9.58e-05	7.37	5.58e-06	0.97
chr4-87	chr4	12510190	12510330	+	5.3	0.917	Intergenic	Intergenic	-824777	824777	NR_003132	391634	Hs.742445	NR_003132		HSP90AB2P	HSP90AB2P	HSP90BB	heat shock protein 90kDa alpha (cytosolic), class B member 2, pseudogene	pseudo	5.3	0.917	10	10	1.8	5.66	1.66e-05	11.32	3.31e-08	0.97
chr15-46	chr15	58996238	58996380	+	4.7	0.846	intron (NM_001110, intron 2 of 15)	7SK|RNA|RNA	-10985	10985	NR_002927	664618	Hs.670224	NR_002927		HSP90AB4P	HSP90AB4P	HSP90Bd|HsHsp90Bd	heat shock protein 90kDa alpha (cytosolic), class B member 4, pseudogene	pseudo	4.7	0.846	11	10	2	4.94	5.11e-05	7.89	9.38e-07	0.97
chr7-201	chr7	75931668	75931810	+	4.7	0.923	promoter-TSS (NM_001540)	promoter-TSS (NM_001540)	-136	136	NM_001540	3315	Hs.520973	NM_001540	ENSG00000106211	HSPB1	HSPB1	CMT2F|HMN2B|HS.76067|HSP27|HSP28|Hsp25|SRP27	heat shock 27kDa protein 1	protein-coding	4.7	0.923	10	10	2	4.94	5.11e-05	5.69	1.58e-05	0.97
chr1-21	chr1	22283105	22283247	+	6.1	0.64	Intergenic	Intergenic	-19426	19426	NM_005529	3339	Hs.562227	NM_005529	ENSG00000142798	HSPG2	HSPG2	HSPG|PLC|PRCAN|SJA|SJS|SJS1	heparan sulfate proteoglycan 2	protein-coding	6.1	0.64	14	13	3.2	4.03	3.35e-05	5.28	2.03e-06	0.96
chr5-6880	chr5	63136937	63137077	+	4.8	0.75	Intergenic	Tigger1|DNA|TcMar-Tigger	121112	121112	NM_000524	3350	Hs.247940	NM_000524	ENSG00000178394	HTR1A	HTR1A	5-HT-1A|5-HT1A|5HT1a|ADRB2RL1|ADRBRL1|G-21|PFMCD	5-hydroxytryptamine (serotonin) receptor 1A, G protein-coupled	protein-coding	4.8	0.75	9	9	1.8	5.09	9.58e-05	10.18	3.74e-07	0.97
chr6-126	chr6	87684307	87684449	+	4.7	0.846	intron (NM_000865, intron 1 of 1)	L1MC4|LINE|L1	37354	37354	NM_000865	3354	Hs.1611	NM_000865	ENSG00000168830	HTR1E	HTR1E	5-HT1E	5-hydroxytryptamine (serotonin) receptor 1E, G protein-coupled	protein-coding	4.7	0.846	11	10	2	4.94	5.11e-05	9.89	1.24e-07	0.97
chr3-223	chr3	87891094	87891234	+	4.8	0.818	Intergenic	Intergenic	-140562	140562	NM_000866	3355	Hs.248136	NM_000866		HTR1F	HTR1F	5-HT-1F|5-HT1F|5HT6|HTR1EL|MR77	5-hydroxytryptamine (serotonin) receptor 1F, G protein-coupled	protein-coding	4.8	0.818	9	9	1.8	5.09	9.58e-05	10.18	3.74e-07	0.97
chrX-96	chrX	113247180	113247320	+	5.3	0.667	Intergenic	Intergenic	-571301	571301	NM_001256761	3358	Hs.149037	NM_000868	ENSG00000147246	HTR2C	HTR2C	5-HT2C|5-HTR2C|HTR1C	5-hydroxytryptamine (serotonin) receptor 2C, G protein-coupled	protein-coding	5.3	0.667	10	10	1.8	5.66	1.66e-05	6.4	5.81e-06	0.97
chr10-173	chr10	92514867	92515007	+	4.8	0.818	intron (NM_019859, intron 1 of 3)	L3|LINE|CR1	102734	102734	NM_019860	3363	Hs.73739	NM_000872	ENSG00000148680	HTR7	HTR7	5-HT7	5-hydroxytryptamine (serotonin) receptor 7, adenylate cyclase-coupled	protein-coding	4.8	0.818	9	9	1.8	5.09	9.58e-05	7.92	3.14e-06	0.97
chr6-93	chr6	673349	673489	+	5.3	0.917	intron (NR_073064, intron 2 of 29)	intron (NR_073064, intron 2 of 29)	-16455	16455	NM_148959	135458	Hs.669039	NM_148959		HUS1B	HUS1B	RP11-532F6.1	HUS1 checkpoint homolog b (S. pombe)	protein-coding	5.3	0.917	10	10	1.8	5.66	1.66e-05	11.32	3.31e-08	0.97
chr16-90	chr16	71178933	71179075	+	5.1	0.7	intron (NM_001270974, intron 7 of 85)	intron (NM_001270974, intron 7 of 85)	85621	85621	NM_001270974	54768	Hs.741939	NM_032821	ENSG00000157423	HYDIN	HYDIN	HYDIN1|HYDIN2|PPP1R31	HYDIN, axonemal central pair apparatus protein	protein-coding	5.1	0.7	12	11	2	5.44	9.23e-06	4.29	7.68e-05	0.97
chr6-242	chr6	82733336	82733478	+	4.7	0.75	Intergenic	Intergenic	224041	224041	NM_015525	25998	Hs.306425	NM_015525	ENSG00000005700	IBTK	IBTK	BTKI|RP1-93K22.1	inhibitor of Bruton agammaglobulinemia tyrosine kinase	protein-coding	4.7	0.75	10	10	2	4.94	5.11e-05	5.14	3.69e-05	0.97
chr6-189	chr6	19813360	19813502	+	4.7	0.714	Intergenic	L2c|LINE|L2	-24170	24170	NM_001546	3400	Hs.731649	NM_001546	ENSG00000172201	ID4	ID4	IDB4|bHLHb27	inhibitor of DNA binding 4, dominant negative helix-loop-helix protein	protein-coding	4.7	0.714	10	10	2	4.94	5.11e-05	7.63	1.26e-06	0.97
chr8-593	chr8	39769050	39769190	+	4.8	0.833	Intergenic	Intergenic	-2208	2208	NM_002164	3620	Hs.840	NM_002164	ENSG00000131203	IDO1	IDO1	IDO|IDO-1|INDO	indoleamine 2,3-dioxygenase 1	protein-coding	4.8	0.833	9	9	1.8	5.09	9.58e-05	6.97	8.71e-06	0.97
chr9-474	chr9	132005041	132005181	+	4.8	0.818	Intergenic	L2b|LINE|L2	-64571	64571	NM_203434	389792	Hs.529857	NM_203434	ENSG00000188483	IER5L	IER5L	bA247A12.2	immediate early response 5-like	protein-coding	4.8	0.818	9	9	1.8	5.09	9.58e-05	8.8	1.35e-06	0.97
chr10-170	chr10	91038994	91039134	+	4.8	0.8	Intergenic	Intergenic	-22642	22642	NM_001547	3433	Hs.437609	NM_001547	ENSG00000119922	IFIT2	IFIT2	G10P2|GARG-39|IFI-54|IFI-54K|IFI54|IFIT-2|ISG-54 K|ISG-54K|ISG54|cig42	interferon-induced protein with tetratricopeptide repeats 2	protein-coding	4.8	0.8	9	9	1.8	5.09	9.58e-05	6.74	1.12e-05	0.97
chr10-159	chr10	91088571	91088713	+	4.7	0.778	intron (NM_001549, intron 1 of 1)	L1ME1|LINE|L1	1040	1040	NM_001549	3437	Hs.731813	NM_001031683	ENSG00000119917	IFIT3	IFIT3	CIG-49|GARG-49|IFI60|IFIT4|IRG2|ISG60|RIG-G	interferon-induced protein with tetratricopeptide repeats 3	protein-coding	4.7	0.778	10	10	2	4.94	5.11e-05	6.68	4.05e-06	0.97
chr9-292	chr9	21248809	21248951	+	4.7	0.833	Intergenic	L1MA5A|LINE|L1	-8902	8902	NM_002172	3448	Hs.93907	NM_002172	ENSG00000228083	IFNA14	IFNA14	IFN-alphaH|LEIF2H	interferon, alpha 14	protein-coding	4.7	0.833	10	10	2	4.94	5.11e-05	6.37	6.08e-06	0.97
chr9-51	chr9	21397341	21397481	+	5.3	0.786	Intergenic	Intergenic	-11735	11735	NM_002170	3445	Hs.73890	NM_002170	ENSG00000120242	IFNA8	IFNA8	IFN-alphaB	interferon, alpha 8	protein-coding	5.3	0.786	11	10	1.8	5.66	1.66e-05	6.84	3.29e-06	0.97
chr21-83	chr21	34746682	34746824	+	4.7	0.688	Intergenic	Intergenic	-28449	28449	NM_005534	3460	Hs.634632	NM_005534	ENSG00000159128	IFNGR2	IFNGR2	AF-1|IFGR2|IFNGT1	interferon gamma receptor 2 (interferon gamma transducer 1)	protein-coding	4.7	0.688	10	10	2	4.94	5.11e-05	8.07	7.65e-07	0.97
chr7-393	chr7	112089317	112089457	+	4.8	0.769	intron (NM_001197080, intron 1 of 11)	intron (NM_001197080, intron 1 of 11)	-1096	1096	NM_001550	3475	Hs.7879	NM_001007245	ENSG00000006652	IFRD1	IFRD1	PC4|TIS7	interferon-related developmental regulator 1	protein-coding	4.8	0.769	9	9	1.8	5.09	9.58e-05	6.67	1.22e-05	0.97
chr20-32	chr20	42239713	42239853	+	6.9	0.812	intron (NM_016004, intron 6 of 13)	intron (NM_016004, intron 6 of 13)	20204	20204	NM_016004	51098	Hs.444332	NM_016004	ENSG00000101052	IFT52	IFT52	C20orf9|CGI-53|NGD2|NGD5|dJ1028D15.1	intraflagellar transport 52 homolog (Chlamydomonas)	protein-coding	6.9	0.812	13	13	2	6.53	1.96e-07	14.09	2.25e-11	0.96
chr3-301	chr3	107903507	107903647	+	4.8	0.833	intron (NM_018010, intron 6 of 10)	Tigger2|DNA|TcMar-Tigger	37840	37840	NM_018010	55081	Hs.412196	NM_018010	ENSG00000114446	IFT57	IFT57	ESRRBL1|HIPPI|MHS4R2	intraflagellar transport 57 homolog (Chlamydomonas)	protein-coding	4.8	0.833	9	9	1.8	5.09	9.58e-05	7.64	4.21e-06	0.97
chr3-279	chr3	160090219	160090361	+	4.7	0.846	intron (NM_001190241, intron 6 of 20)	intron (NM_001190241, intron 6 of 20)	11264	11264	NM_001190242	57560	Hs.478095	NM_001190241	ENSG00000068885	IFT80	IFT80	ATD2|WDR56	intraflagellar transport 80 homolog (Chlamydomonas)	protein-coding	4.7	0.846	10	10	2	4.94	5.11e-05	9.51	1.76e-07	0.97
chr15-59	chr15	99200633	99200773	+	5.3	0.733	intron (NM_000875, intron 1 of 20)	intron (NM_000875, intron 1 of 20)	7942	7942	NM_000875	3480	Hs.714012	NM_000875	ENSG00000140443	IGF1R	IGF1R	CD221|IGFIR|IGFR|JTK13	insulin-like growth factor 1 receptor	protein-coding	5.3	0.733	10	10	1.8	5.66	1.66e-05	8.38	5.46e-07	0.97
chr4-234	chr4	58540350	58540490	+	4.8	0.786	Intergenic	Intergenic	-563869	563869	NM_001253835	3490	Hs.691061	NM_001253835	ENSG00000163453	IGFBP7	IGFBP7	AGM|FSTL2|IBP-7|IGFBP-7|IGFBP-7v|IGFBPRP1|MAC25|PSF|RAMSVPS|TAF	insulin-like growth factor binding protein 7	protein-coding	4.8	0.786	9	9	1.8	5.09	9.58e-05	7.73	3.82e-06	0.97
chr9-35	chr9	38454196	38454336	+	6.3	0.857	Intergenic	Intergenic	-29822	29822	NM_001007563	347252	Hs.349705	NM_001007563	ENSG00000137142	IGFBPL1	IGFBPL1	IGFBP-RP4|IGFBPRP4|bA113O24.1	insulin-like growth factor binding protein-like 1	protein-coding	6.3	0.857	12	12	2	6.03	1.29e-06	10.7	2.95e-09	0.96
chr5-6708	chr5	139511723	139511865	+	4.7	0.909	Intergenic	Intergenic	6273	6273	NM_001007189	492311	Hs.696360	NM_001007189	ENSG00000182700	IGIP	IGIP	C5orf53	IgA-inducing protein homolog (Bos taurus)	protein-coding	4.7	0.909	10	10	2	4.94	5.11e-05	7.63	1.26e-06	0.97
chr3-251	chr3	118345046	118345188	+	4.7	0.909	Intergenic	Intergenic	-316806	316806	NR_046230	100506765	Hs.660823	NR_046230		IGSF11-AS1	IGSF11-AS1	-	IGSF11 antisense RNA 1	miscRNA	4.7	0.909	10	10	2	4.94	5.11e-05	7.71	1.14e-06	0.97
chr1-240	chr1	206592393	206592533	+	5.3	0.688	intron (NM_015326, intron 8 of 19)	intron (NM_015326, intron 8 of 19)	-51123	51123	NM_001193321	9641	Hs.321045	NM_001193321	ENSG00000143466	IKBKE	IKBKE	IKK-E|IKK-i|IKKE|IKKI	inhibitor of kappa light polypeptide gene enhancer in B-cells, kinase epsilon	protein-coding	5.3	0.688	10	10	2	5.03	4.45e-05	6.4	5.81e-06	0.97
chr17-56	chr17	37926697	37926837	+	5.3	0.632	intron (NM_001257413, intron 3 of 3)	intron (NM_001257413, intron 3 of 3)	7711	7711	NR_047561	22806	Hs.371680	NM_001257408	ENSG00000161405	IKZF3	IKZF3	AIO|AIOLOS|ZNFN1A3	IKAROS family zinc finger 3 (Aiolos)	protein-coding	5.3	0.632	11	10	1.8	5.66	1.66e-05	4.99	4.69e-05	0.97
chrX-292	chrX	117907088	117907228	+	4.8	0.818	intron (NM_001560, intron 8 of 10)	intron (NM_001560, intron 8 of 10)	45599	45599	NM_001560	3597	Hs.496646	NM_001560	ENSG00000131724	IL13RA1	IL13RA1	CD213A1|IL-13Ra|NR4	interleukin 13 receptor, alpha 1	protein-coding	4.8	0.818	9	9	1.8	5.09	9.58e-05	8.93	1.2e-06	0.97
chr11-117	chr11	71709505	71709647	+	5.1	0.786	promoter-TSS (NM_001039659)	promoter-TSS (NM_001039659)	-382	382	NM_001039660	10068	Hs.591967	NM_001039659	ENSG00000137496	IL18BP	IL18BP	IL18BPa	interleukin 18 binding protein	protein-coding	5.1	0.786	11	11	2	5.44	9.23e-06	8.68	1.07e-07	0.97
chr2-101	chr2	113533311	113533453	+	5.6	0.857	intron (NM_000575, intron 6 of 6)	intron (NM_000575, intron 6 of 6)	9589	9589	NM_000575	3552	Hs.1722	NM_000575	ENSG00000115008	IL1A	IL1A	IL-1A|IL1|IL1-ALPHA|IL1F1	interleukin 1, alpha	protein-coding	5.6	0.857	12	12	2	5.93	1.53e-06	4.71	1.52e-05	0.96
chr3-141	chr3	190303897	190304037	+	4.8	0.688	intron (NM_001167928, intron 4 of 12)	L2c|LINE|L2	72127	72127	NM_001167931	3556	Hs.478673	NM_001167928	ENSG00000196083	IL1RAP	IL1RAP	C3orf13|IL-1RAcP|IL1R3	interleukin 1 receptor accessory protein	protein-coding	4.8	0.688	10	9	1.8	5.09	9.58e-05	6.67	1.22e-05	0.97
chrX-43	chrX	29234913	29235053	+	5.3	0.8	intron (NM_014271, intron 2 of 10)	LTR40b|LTR|ERVL	629302	629302	NM_014271	11141	Hs.658912	NM_014271	ENSG00000169306	IL1RAPL1	IL1RAPL1	IL1R8|IL1RAPL|MRX10|MRX21|MRX34|OPHN4|TIGIRR-2	interleukin 1 receptor accessory protein-like 1	protein-coding	5.3	0.8	10	10	1.8	5.66	1.66e-05	9.39	1.97e-07	0.97
chrX-49	chrX	103696672	103696814	+	4.7	0.647	Intergenic	Intergenic	-114253	114253	NM_017416	26280	Hs.675519	NM_017416	ENSG00000189108	IL1RAPL2	IL1RAPL2	IL-1R9|IL1R9|IL1RAPL-2|TIGIRR-1	interleukin 1 receptor accessory protein-like 2	protein-coding	4.7	0.647	11	10	2	4.94	5.11e-05	7.55	1.39e-06	0.97
chr3-331	chr3	137016920	137017060	+	4.8	0.9	Intergenic	Intergenic	340283	340283	NM_144717	53833	Hs.61232	NM_144717	ENSG00000174564	IL20RB	IL20RB	DIRS1|FNDC6|IL-20R2	interleukin 20 receptor beta	protein-coding	4.8	0.9	9	9	1.8	5.09	9.58e-05	10.18	3.74e-07	0.97
chr1-227	chr1	207056059	207056201	+	5.1	0.75	Intergenic	L1MB7|LINE|L1	-14658	14658	NM_001185156	11009	Hs.741469	NM_001185156	ENSG00000162892	IL24	IL24	C49A|FISP|IL10B|MDA7|MOB5|ST16	interleukin 24	protein-coding	5.1	0.75	11	11	2	5.44	9.23e-06	6.06	3.38e-06	0.97
chr9-90	chr9	6220361	6220501	+	5.3	0.8	intron (NM_033439, intron 1 of 7)	intron (NM_033439, intron 1 of 7)	4645	4645	NM_033439	90865	Hs.731660	NM_001199640	ENSG00000137033	IL33	IL33	C9orf26|DVS27|IL1F11|NF-HEV|NFEHEV|RP11-575C20.2	interleukin 33	protein-coding	5.3	0.8	10	10	2	5.03	4.45e-05	5.97	1.06e-05	0.97
chr16-106	chr16	70663124	70663264	+	5.8	0.733	intron (NM_001172772, intron 1 of 6)	L1ME3A|LINE|L1	5299	5299	NM_001172772	146433	Hs.461214	NM_001172771	ENSG00000157368	IL34	IL34	C16orf77|IL-34	interleukin 34	protein-coding	5.8	0.733	11	11	1.8	6.22	2.63e-06	10.91	1.09e-08	0.97
chr2-175	chr2	113771182	113771322	+	5.3	0.75	Intergenic	L1MEe|LINE|L1	7803	7803	NM_014440	27179	Hs.278910	NM_014440	ENSG00000136694	IL36A	IL36A	FIL1|FIL1(EPSILON)|FIL1E|IL-1F6|IL1(EPSILON)|IL1F6	interleukin 36, alpha	protein-coding	5.3	0.75	10	10	2	5.03	4.45e-05	6.34	6.28e-06	0.97
chr2-102	chr2	113654044	113654186	+	5.1	0.737	Intergenic	L1MD2|LINE|L1	-16433	16433	NM_173203	27178	Hs.166371	NM_014439	ENSG00000125571	IL37	IL37	FIL1|FIL1(ZETA)|FIL1Z|IL-1F7|IL-1H|IL-1H4|IL-1RP1|IL-37|IL1F7|IL1H4|IL1RP1	interleukin 37	protein-coding	5.1	0.737	12	11	2.4	4.55	4.58e-05	5.49	8.39e-06	0.97
chr5-397	chr5	35751742	35751884	+	6.1	0.778	intron (NM_024867, intron 23 of 36)	intron (NM_024867, intron 23 of 36)	-105164	105164	NM_002185	3575	Hs.591742	NM_002185	ENSG00000168685	IL7R	IL7R	CD127|CDW127|IL-7R-alpha|IL7RA|ILRA	interleukin 7 receptor	protein-coding	6.1	0.778	14	13	3.2	4.03	3.35e-05	8.36	1.19e-08	0.96
chr2-137	chr2	86422293	86422433	+	5.3	0.917	intron (NM_001100170, intron 1 of 14)	CpG	530	530	NM_001100169	10989	Hs.148559	NM_001100169	ENSG00000132305	IMMT	IMMT	HMP|MINOS2|P87|P87/89|P89|PIG52	inner membrane protein, mitochondrial	protein-coding	5.3	0.917	10	10	1.8	5.66	1.66e-05	9.52	1.75e-07	0.97
chr8-242	chr8	57837709	57837849	+	5.3	0.846	Intergenic	Intergenic	68651	68651	NM_017813	54928	Hs.438689	NM_017813	ENSG00000104331	IMPAD1	IMPAD1	GPAPP|IMP 3|IMP-3|IMPA3	inositol monophosphatase domain containing 1	protein-coding	5.3	0.846	10	10	2	5.03	4.45e-05	11.18	3.7e-08	0.97
chr6-124	chr6	76645851	76645993	+	4.7	0.857	intron (NM_001563, intron 14 of 16)	MIR3|SINE|MIR	136413	136413	NM_001563	3617	Hs.590893	NM_001563	ENSG00000112706	IMPG1	IMPG1	GP147|IPM150|SPACR	interphotoreceptor matrix proteoglycan 1	protein-coding	4.7	0.857	11	10	2	4.94	5.11e-05	6.87	3.14e-06	0.97
chr3-102	chr3	100912762	100912902	+	5.3	0.846	Intergenic	Intergenic	126587	126587	NM_016247	50939	Hs.209249	NM_016247	ENSG00000081148	IMPG2	IMPG2	IPM200|RP56|SPACRCAN	interphotoreceptor matrix proteoglycan 2	protein-coding	5.3	0.846	10	10	1.8	5.66	1.66e-05	6.07	9.15e-06	0.97
chr10-109	chr10	105033073	105033215	+	5.1	0.667	Intergenic	Intergenic	-3776	3776	NM_032727	9118	Hs.500916	NM_032727	ENSG00000148798	INA	INA	NEF5|NF-66|TXBP-1	internexin neuronal intermediate filament protein, alpha	protein-coding	5.1	0.667	11	11	2	5.44	9.23e-06	10.87	1.13e-08	0.97
chr1-156	chr1	62208965	62209105	+	5.3	0.714	intron (NM_176877, intron 1 of 42)	L2c|LINE|L2	886	886	NM_176877	10207	Hs.478125	NM_176877	ENSG00000132849	INADL	INADL	Cipp|InaD-like|PATJ|hINADL	InaD-like (Drosophila)	protein-coding	5.3	0.714	10	10	2	5.03	4.45e-05	8.69	3.94e-07	0.97
chr4-154	chr4	184438574	184438716	+	5.1	0.846	Intergenic	Intergenic	12425	12425	NM_001564	3622	Hs.107153	NM_001564	ENSG00000168556	ING2	ING2	ING1L|p33ING2	inhibitor of growth family, member 2	protein-coding	5.1	0.846	11	11	2	5.44	9.23e-06	7.87	2.77e-07	0.97
chr2-176	chr2	121157671	121157813	+	4.7	0.684	Intergenic	Intergenic	54023	54023	NM_002193	3625	Hs.1735	NM_002193	ENSG00000163083	INHBB	INHBB	-	inhibin, beta B	protein-coding	4.7	0.684	11	10	2	4.94	5.11e-05	4.72	7.41e-05	0.97
chr2-318	chr2	99066087	99066227	+	4.8	0.769	intron (NM_001134225, intron 1 of 24)	L1MC4|LINE|L1	4836	4836	NM_001134224	3631	Hs.469386	NM_001134224	ENSG00000040933	INPP4A	INPP4A	INPP4|TVAS1	inositol polyphosphate-4-phosphatase, type I, 107kDa	protein-coding	4.8	0.769	9	9	1.8	5.09	9.58e-05	5.46	5.65e-05	0.97
chr4-68	chr4	143503932	143504074	+	5.1	0.8	intron (NM_003866, intron 2 of 26)	intron (NM_003866, intron 2 of 26)	263601	263601	NM_003866	8821	Hs.531403	NM_001101669	ENSG00000109452	INPP4B	INPP4B	-	inositol polyphosphate-4-phosphatase, type II, 105kDa	protein-coding	5.1	0.8	12	11	2	5.44	9.23e-06	8.3	1.65e-07	0.97
chr9-206	chr9	5237960	5238102	+	4.7	0.846	Intergenic	L1MB2|LINE|L1	6612	6612	NM_002195	3641	Hs.418506	NM_002195	ENSG00000120211	INSL4	INSL4	EPIL|PLACENTIN	insulin-like 4 (placenta)	protein-coding	4.7	0.846	10	10	2	4.94	5.11e-05	9.89	1.24e-07	0.97
chr20-431	chr20	20426901	20427041	+	4.8	0.9	intron (NM_020343, intron 37 of 39)	intron (NM_020343, intron 37 of 39)	78206	78206	NM_002196	3642	Hs.89584	NM_002196	ENSG00000173404	INSM1	INSM1	IA-1|IA1	insulinoma-associated 1	protein-coding	4.8	0.9	9	9	1.8	5.09	9.58e-05	9.6	6.02e-07	0.97
chr14-746	chr14	35990197	35990339	+	4.7	0.867	Intergenic	Intergenic	-12980	12980	NM_032594	84684	Hs.62813	NM_032594	ENSG00000168348	INSM2	INSM2	IA-6|IA6|mlt1	insulinoma-associated 2	protein-coding	4.7	0.867	10	10	2	4.94	5.11e-05	6.81	3.42e-06	0.97
chr4-119	chr4	106629416	106629556	+	4.8	0.667	promoter-TSS (NM_024751)	promoter-TSS (NM_024751)	395	395	NM_001142471	57117	Hs.480454	NM_001142471	ENSG00000138785	INTS12	INTS12	INT12|PHF22	integrator complex subunit 12	protein-coding	4.8	0.667	10	9	1.8	5.09	9.58e-05	5.66	4.33e-05	0.97
chr11-57	chr11	77705471	77705613	+	5.6	0.65	intron (NM_033547, intron 1 of 22)	intron (NM_033547, intron 1 of 22)	175	175	NM_033547	92105	Hs.533723	NM_033547	ENSG00000149262	INTS4	INTS4	INT4|MST093	integrator complex subunit 4	protein-coding	5.6	0.65	12	12	2	5.93	1.53e-06	5.91	1.6e-06	0.96
chr4-66	chr4	127866307	127866447	+	5.3	0.706	Intergenic	Intergenic	-687710	687710	NM_015693	27152	Hs.391481	NM_015693	ENSG00000164066	INTU	INTU	INT|PDZD6|PDZK6	inturned planar cell polarity effector homolog (Drosophila)	protein-coding	5.3	0.706	11	10	1.8	5.66	1.66e-05	8.29	6.06e-07	0.97
chr3-67	chr3	49808787	49808927	+	5.3	0.688	intron (NM_153273, intron 1 of 5)	L1ME2z|LINE|L1	14770	14770	NM_001242829	9807	Hs.386168	NM_001006115	ENSG00000176095	IP6K1	IP6K1	IHPK1|PiUS	inositol hexakisphosphate kinase 1	protein-coding	5.3	0.688	10	10	2	5.03	4.45e-05	6.07	9.15e-06	0.97
chr5-3363	chr5	61771655	61771795	+	4.8	0.588	intron (NM_016338, intron 8 of 29)	intron (NM_016338, intron 8 of 29)	57014	57014	NM_001134779	51194	Hs.482269	NM_001134779	ENSG00000086200	IPO11	IPO11	RanBP11	importin 11	protein-coding	4.8	0.588	10	9	1.8	5.09	9.58e-05	9.75	5.32e-07	0.97
chr12-86	chr12	30778963	30779103	+	4.8	0.9	Intergenic	L1M4c|LINE|L1	51145	51145	NM_001190995	10526	Hs.505136	NM_001190995	ENSG00000133704	IPO8	IPO8	RANBP8	importin 8	protein-coding	4.8	0.9	9	9	1.8	5.09	9.58e-05	8.57	1.68e-06	0.97
chr9-138	chr9	95469925	95470065	+	4.8	0.714	Intergenic	L1MCa|LINE|L1	-37448	37448	NM_022755	64768	Hs.713775	NM_022755	ENSG00000127080	IPPK	IPPK	C9orf12|INSP5K2|IP5K|IPK1|bA476B13.1	inositol 1,3,4,5,6-pentakisphosphate 2-kinase	protein-coding	4.8	0.714	10	9	1.8	5.09	9.58e-05	7.83	3.47e-06	0.97
chr3-312	chr3	197686418	197686560	+	4.7	0.55	promoter-TSS (NR_026787)	promoter-TSS (NR_026787)	397	397	NM_032263	84223	Hs.591675	NM_001134435	ENSG00000114473	IQCG	IQCG	-	IQ motif containing G	protein-coding	4.7	0.55	10	10	2	4.94	5.11e-05	4.96	4.98e-05	0.97
chr6-280	chr6	79147988	79148128	+	4.8	0.769	Intergenic	Intergenic	-429131	429131	NM_001010844	134728	Hs.656212	NM_001010844	ENSG00000146243	IRAK1BP1	IRAK1BP1	AIP70|SIMPL	interleukin-1 receptor-associated kinase 1 binding protein 1	protein-coding	4.8	0.769	9	9	1.8	5.09	9.58e-05	8.34	2.08e-06	0.97
chr15-28	chr15	78742482	78742624	+	5.1	0.923	intron (NM_004136, intron 2 of 21)	intron (NM_004136, intron 2 of 21)	12035	12035	NM_004136	3658	Hs.436031	NM_004136	ENSG00000136381	IREB2	IREB2	ACO3|IRP2|IRP2AD	iron-responsive element binding protein 2	protein-coding	5.1	0.923	12	11	2.4	4.55	4.58e-05	7.95	2.51e-07	0.97
chr1-325	chr1	234747363	234747503	+	5.3	0.786	Intergenic	Intergenic	-2162	2162	NM_001077397	359948	Hs.350268	NM_001077397	ENSG00000168264	IRF2BP2	IRF2BP2	-	interferon regulatory factor 2 binding protein 2	protein-coding	5.3	0.786	10	10	1.8	5.66	1.66e-05	4.7	7.77e-05	0.97
chr1-253	chr1	209979706	209979846	+	5.3	0.812	promoter-TSS (NM_006147)	promoter-TSS (NM_006147)	-256	256	NM_006147	3664	Hs.591415	NM_001206696	ENSG00000117595	IRF6	IRF6	LPS|OFC6|PIT|PPS|VWS|VWS1	interferon regulatory factor 6	protein-coding	5.3	0.812	10	10	1.8	5.66	1.66e-05	4.63	8.64e-05	0.97
chrX-160	chrX	108169946	108170088	+	4.7	0.769	Intergenic	L1MD1|LINE|L1	-190410	190410	NM_003604	8471	Hs.460872	NM_003604	ENSG00000133124	IRS4	IRS4	IRS-4|PY160	insulin receptor substrate 4	protein-coding	4.7	0.769	10	10	2	4.94	5.11e-05	5.18	3.47e-05	0.97
chr5-763	chr5	3746716	3746856	+	4.8	0.846	Intergenic	THE1D|LTR|ERVL-MaLR	150618	150618	NM_024337	79192	Hs.424156	NM_024337	ENSG00000170549	IRX1	IRX1	IRX-5|IRXA1	iroquois homeobox 1	protein-coding	4.8	0.846	11	9	1.8	5.09	9.58e-05	6.4	1.68e-05	0.97
chr5-64	chr5	2711225	2711365	+	6.9	0.75	Intergenic	L1ME4a|LINE|L1	40474	40474	NM_033267	153572	Hs.282089	NM_001134222	ENSG00000170561	IRX2	IRX2	IRXA2	iroquois homeobox 2	protein-coding	6.9	0.75	14	13	2	6.53	1.96e-07	7.63	3.39e-08	0.96
chr5-755	chr5	1907857	1907997	+	5.8	0.8	Intergenic	MLT1H2|LTR|ERVL-MaLR	-25047	25047	NM_016358	50805	Hs.196927	NM_016358	ENSG00000113430	IRX4	IRX4	IRXA3	iroquois homeobox 4	protein-coding	5.8	0.8	11	11	1.8	6.22	2.63e-06	6.25	2.54e-06	0.97
chr5-6646	chr5	50370827	50370969	+	4.7	0.833	Intergenic	Intergenic	-308060	308060	NM_002202	3670	Hs.505	NM_002202	ENSG00000016082	ISL1	ISL1	ISLET1|Isl-1	ISL LIM homeobox 1	protein-coding	4.7	0.833	10	10	2	4.94	5.11e-05	7.55	1.39e-06	0.97
chr20-111	chr20	32950664	32950806	+	5.6	0.722	promoter-TSS (NM_031483)	promoter-TSS (NM_031483)	-306	306	NM_001257137	83737	Hs.632272	NM_001257137	ENSG00000078747	ITCH	ITCH	AIF4|AIP4|NAPP1|dJ468O1.1	itchy E3 ubiquitin protein ligase	protein-coding	5.6	0.722	12	12	2.4	4.96	9.07e-06	5.11	6.81e-06	0.96
chr5-3354	chr5	52129717	52129857	+	4.8	0.769	intron (NM_181501, intron 1 of 28)	intron (NM_181501, intron 1 of 28)	45651	45651	NM_181501	3672	Hs.644352	NM_181501	ENSG00000213949	ITGA1	ITGA1	CD49a|VLA1	integrin, alpha 1	protein-coding	4.8	0.769	10	9	1.8	5.09	9.58e-05	7.73	3.82e-06	0.97
chr5-6858	chr5	52315852	52315992	+	4.8	0.692	intron (NR_073107, intron 1 of 28)	MER44B|DNA|TcMar-Tigger	30766	30766	NR_073106	3673	Hs.482077	NM_002203	ENSG00000164171	ITGA2	ITGA2	BR|CD49B|GPIa|HPA-5|VLA-2|VLAA2	integrin, alpha 2 (CD49B, alpha 2 subunit of VLA-2 receptor)	protein-coding	4.8	0.692	9	9	1.8	5.09	9.58e-05	7.37	5.58e-06	0.97
chr2-393	chr2	182382232	182382374	+	4.7	0.8	intron (NM_000885, intron 17 of 27)	intron (NM_000885, intron 17 of 27)	60684	60684	NM_000885	3676	Hs.440955	NM_000885	ENSG00000115232	ITGA4	ITGA4	CD49D|IA4	integrin, alpha 4 (antigen CD49D, alpha 4 subunit of VLA-4 receptor)	protein-coding	4.7	0.8	10	10	2	4.94	5.11e-05	7.71	1.14e-06	0.97
chr17-184	chr17	45318047	45318189	+	5.1	0.75	Intergenic	MIRb|SINE|MIR	-13090	13090	NM_000212	3690	Hs.218040	NM_000212	ENSG00000259207	ITGB3	ITGB3	BDPLT2|CD61|GP3A|GPIIIa|GT	integrin, beta 3 (platelet glycoprotein IIIa, antigen CD61)	protein-coding	5.1	0.75	11	11	2	5.44	9.23e-06	6.88	1.02e-06	0.97
chr2-486	chr2	161098722	161098862	+	4.8	0.765	Intergenic	MLT2C1|LTR|ERVL	-42202	42202	NM_000888	3694	Hs.470399	NM_000888	ENSG00000115221	ITGB6	ITGB6	-	integrin, beta 6	protein-coding	4.8	0.765	9	9	1.8	5.09	9.58e-05	7.2	6.69e-06	0.97
chrX-19	chrX	54755936	54756078	+	5.1	0.75	Intergenic	MIR3|SINE|MIR	68666	68666	NM_198510	347365	Hs.454272	NM_198510	ENSG00000102313	ITIH6	ITIH6	ITIH5L|UNQ6369|dJ14O9.1	inter-alpha-trypsin inhibitor heavy chain family, member 6	protein-coding	5.1	0.75	12	11	2	5.44	9.23e-06	10.87	1.13e-08	0.97
chr1-79	chr1	160931378	160931518	+	5.3	0.833	Intergenic	Intergenic	-6859	6859	NM_080878	142683	Hs.385631	NM_080878	ENSG00000158764	ITLN2	ITLN2	HL-2|HL2	intelectin 2	protein-coding	5.3	0.833	11	10	1.8	5.66	1.66e-05	11.32	3.31e-08	0.97
chr1-281	chr1	226858146	226858288	+	5.1	0.733	intron (NM_002221, intron 2 of 7)	L1ME4a|LINE|L1	68659	68659	NM_002221	3707	Hs.741374	NM_002221	ENSG00000143772	ITPKB	ITPKB	IP3-3KB|IP3K|IP3K-B|IP3KB|PIG37	inositol-trisphosphate 3-kinase B	protein-coding	5.1	0.733	11	11	2	5.44	9.23e-06	8.68	1.07e-07	0.97
chr21-96	chr21	35051526	35051666	+	4.8	0.643	intron (NM_001001132, intron 1 of 29)	intron (NM_001001132, intron 1 of 29)	36812	36812	NM_003024	6453	Hs.160324	NM_001001132	ENSG00000205726	ITSN1	ITSN1	ITSN|SH3D1A|SH3P17	intersectin 1 (SH3 domain protein)	protein-coding	4.8	0.643	9	9	1.8	5.09	9.58e-05	6.82	1.03e-05	0.97
chr6-182	chr6	14745820	14745962	+	4.7	0.588	Intergenic	Intergenic	-500315	500315	NM_004973	3720	Hs.269059	NM_001267040	ENSG00000008083	JARID2	JARID2	JMJ	jumonji, AT rich interactive domain 2	protein-coding	4.7	0.588	10	10	2	4.94	5.11e-05	5.83	1.28e-05	0.97
chr14-1426	chr14	75942254	75942394	+	4.8	0.8	Intergenic	(CATA)n|Simple_repeat|Simple_repeat	43487	43487	NM_001135049	122953	Hs.196482	NM_001135047	ENSG00000140044	JDP2	JDP2	JUNDM2	Jun dimerization protein 2	protein-coding	4.8	0.8	9	9	1.8	5.09	9.58e-05	8.93	1.2e-06	0.97
chr8-43	chr8	75105953	75106095	+	5.1	0.75	Intergenic	MIR|SINE|MIR	127538	127538	NM_020647	56704	Hs.657367	NM_020647	ENSG00000104369	JPH1	JPH1	JP-1|JP1	junctophilin 1	protein-coding	5.1	0.75	13	11	2	5.44	9.23e-06	7.01	8.56e-07	0.97
chr20-52	chr20	42718198	42718338	+	5.8	0.632	Intergenic	Intergenic	97950	97950	NM_175913	57158	Hs.441737	NM_020433	ENSG00000149596	JPH2	JPH2	CMH17|JP-2|JP2	junctophilin 2	protein-coding	5.8	0.632	12	11	2	5.53	7.92e-06	5.1	1.66e-05	0.97
chr16-338	chr16	87670275	87670417	+	4.7	0.714	intron (NM_020655, intron 1 of 4)	intron (NM_020655, intron 1 of 4)	33847	33847	NM_020655	57338	Hs.592068	NM_020655	ENSG00000154118	JPH3	JPH3	CAGL237|HDL2|JP-3|JP3|TNRC22	junctophilin 3	protein-coding	4.7	0.714	10	10	2	4.94	5.11e-05	7.71	1.14e-06	0.97
chr3-101	chr3	124259249	124259391	+	5.1	0.917	intron (NM_001024660, intron 33 of 59)	intron (NM_001024660, intron 33 of 59)	-44186	44186	NM_007064	8997	Hs.8004	NM_001024660	ENSG00000160145	KALRN	KALRN	ARHGEF24|CHD5|CHDS5|DUET|DUO|HAPIP|TRAD	kalirin, RhoGEF kinase	protein-coding	5.1	0.917	11	11	2	5.44	9.23e-06	10.87	1.13e-08	0.97
chr9-183	chr9	693640	693782	+	4.7	0.8	intron (NM_015158, intron 2 of 11)	intron (NM_015158, intron 2 of 11)	-13095	13095	NM_153186	23189	Hs.306764	NM_001256876	ENSG00000107104	KANK1	KANK1	ANKRD15|CPSQ2|KANK	KN motif and ankyrin repeat domains 1	protein-coding	4.7	0.8	10	10	2	4.94	5.11e-05	4.69	7.83e-05	0.97
chr17-377	chr17	44259632	44259774	+	4.7	0.786	intron (NM_001193465, intron 2 of 15)	intron (NM_001193465, intron 2 of 15)	10463	10463	NM_001193466	284058	Hs.648744	NM_001193465	ENSG00000120071	KANSL1	KANSL1	CENP-36|KDVS|KIAA1267|MSL1v1|NSL1|hMSL1v1	KAT8 regulatory NSL complex subunit 1	protein-coding	4.7	0.786	10	10	2	4.94	5.11e-05	4.92	5.28e-05	0.97
chr1-148	chr1	14891606	14891748	+	4.7	0.733	Intergenic	Intergenic	-33536	33536	NM_015209	23254	Hs.368823	NM_001017999	ENSG00000189337	KAZN	KAZN	KAZ	kazrin, periplakin interacting protein	protein-coding	4.7	0.733	11	10	2	4.94	5.11e-05	9.89	1.24e-07	0.97
chr3-40	chr3	127680617	127680757	+	5.8	0.857	intron (NM_207335, intron 3 of 4)	intron (NM_207335, intron 3 of 4)	38785	38785	NM_207335	166348	Hs.132087	NM_207335	ENSG00000187715	KBTBD12	KBTBD12	KLHDC6	kelch repeat and BTB (POZ) domain containing 12	protein-coding	5.8	0.857	11	11	2	5.53	7.92e-06	8.24	1.77e-07	0.97
chr18-44	chr18	38542647	38542787	+	5.3	0.769	Intergenic	L1PA15|LINE|L1	557844	557844	NR_002838	641516	Hs.116612	NR_002838		KC6	KC6	-	keratoconus gene 6	miscRNA	5.3	0.769	10	10	2	5.03	4.45e-05	11.32	3.31e-08	0.97
chr2-134	chr2	85167871	85168011	+	4.8	0.833	Intergenic	Intergenic	-30290	30290	NM_020122	56888	Hs.654968	NM_020122	ENSG00000176407	KCMF1	KCMF1	DEBT91|FIGC|PCMF|ZZZ1	potassium channel modulatory factor 1	protein-coding	4.8	0.833	10	9	1.8	5.09	9.58e-05	10.06	4.13e-07	0.97
chr12-20	chr12	5257409	5257551	+	4.7	0.75	Intergenic	Intergenic	104395	104395	NM_002234	3741	Hs.741439	NM_002234	ENSG00000130037	KCNA5	KCNA5	ATFB7|HCK1|HK2|HPCN1|KV1.5|PCN1	potassium voltage-gated channel, shaker-related subfamily, member 5	protein-coding	4.7	0.75	11	10	2	4.94	5.11e-05	7.89	9.38e-07	0.97
chr20-726	chr20	48037379	48037519	+	4.8	0.818	intron (NM_004975, intron 1 of 1)	intron (NM_004975, intron 1 of 1)	61732	61732	NM_004975	3745	Hs.84244	NM_004975	ENSG00000158445	KCNB1	KCNB1	DRK1|KV2.1|h-DRK1	potassium voltage-gated channel, Shab-related subfamily, member 1	protein-coding	4.8	0.818	9	9	1.8	5.09	9.58e-05	6.04	2.65e-05	0.97
chr7-187	chr7	119822668	119822808	+	4.8	0.857	Intergenic	Intergenic	-90984	90984	NM_012281	3751	Hs.654739	NM_012281	ENSG00000184408	KCND2	KCND2	KV4.2|RK5	potassium voltage-gated channel, Shal-related subfamily, member 2	protein-coding	4.8	0.857	10	9	1.8	5.09	9.58e-05	7.46	5.08e-06	0.97
chrX-170	chrX	108901877	108902019	+	4.7	0.733	intron (NM_022977, intron 16 of 16)	L2c|LINE|L2	-33555	33555	NM_012282	23630	Hs.522753	NM_012282	ENSG00000176076	KCNE1L	KCNE1L	KCNE5	KCNE1-like	protein-coding	4.7	0.733	10	10	2	4.94	5.11e-05	4.75	7.01e-05	0.97
chr2-432	chr2	223904441	223904583	+	4.7	0.769	Intergenic	L1M4|LINE|L1	-12350	12350	NM_080671	23704	Hs.348522	NM_080671	ENSG00000152049	KCNE4	KCNE4	MIRP3	potassium voltage-gated channel, Isk-related family, member 4	protein-coding	4.7	0.769	10	10	2	4.94	5.11e-05	7.46	1.53e-06	0.97
chr20-152	chr20	49610068	49610208	+	4.8	0.733	Intergenic	MLT1K|LTR|ERVL-MaLR	29537	29537	NM_002237	3755	Hs.735151	NM_002237	ENSG00000026559	KCNG1	KCNG1	K13|KCNG|KV6.1|kH2	potassium voltage-gated channel, subfamily G, member 1	protein-coding	4.8	0.733	11	9	1.8	5.09	9.58e-05	5.15	8.77e-05	0.97
chr12-107	chr12	49889495	49889635	+	4.8	0.75	intron (NM_023071, intron 7 of 13)	intron (NM_023071, intron 7 of 13)	-43375	43375	NM_012284	23416	Hs.64064	NM_012284	ENSG00000135519	KCNH3	KCNH3	BEC1|ELK2|Kv12.2	potassium voltage-gated channel, subfamily H (eag-related), member 3	protein-coding	4.8	0.75	9	9	1.8	5.09	9.58e-05	8.45	1.87e-06	0.97
chr14-124	chr14	63442477	63442617	+	6.3	0.765	intron (NM_172376, intron 6 of 10)	L1MEe|LINE|L1	69408	69408	NM_172375	27133	Hs.27043	NM_139318	ENSG00000140015	KCNH5	KCNH5	EAG2|H-EAG2|Kv10.2	potassium voltage-gated channel, subfamily H (eag-related), member 5	protein-coding	6.3	0.765	12	12	2.7	4.52	2.23e-05	6.21	9.54e-07	0.96
chr2-492	chr2	163677889	163678029	+	4.8	0.818	intron (NM_173162, intron 2 of 7)	intron (NM_173162, intron 2 of 7)	17298	17298	NM_173162	90134	Hs.657413	NM_033272	ENSG00000184611	KCNH7	KCNH7	ERG3|HERG3|Kv11.3	potassium voltage-gated channel, subfamily H (eag-related), member 7	protein-coding	4.8	0.818	9	9	1.8	5.09	9.58e-05	8.93	1.2e-06	0.97
chr4-190	chr4	22061355	22061495	+	4.8	0.75	Intergenic	Intergenic	-111051	111051	NM_147182	80333	Hs.655705	NM_001035003	ENSG00000185774	KCNIP4	KCNIP4	CALP|KCHIP4	Kv channel interacting protein 4	protein-coding	4.8	0.75	9	9	1.8	5.09	9.58e-05	9.06	9.65e-07	0.97
chr17-205	chr17	68405743	68405885	+	4.7	0.733	Intergenic	Intergenic	240138	240138	NM_000891	3759	Hs.1547	NM_000891	ENSG00000123700	KCNJ2	KCNJ2	ATFB9|HHBIRK1|HHIRK1|IRK1|KIR2.1|LQT7|SQT3	potassium inwardly-rectifying channel, subfamily J, member 2	protein-coding	4.7	0.733	11	10	2	4.94	5.11e-05	7.46	1.53e-06	0.97
chr2-367	chr2	155518805	155518947	+	4.7	0.769	Intergenic	L1ME3A|LINE|L1	-36217	36217	NM_001260508	3760	Hs.591606	NM_001260508	ENSG00000162989	KCNJ3	KCNJ3	GIRK1|KGA|KIR3.1	potassium inwardly-rectifying channel, subfamily J, member 3	protein-coding	4.7	0.769	10	10	2	4.94	5.11e-05	8.07	7.65e-07	0.97
chr1-577	chr1	215187560	215187702	+	4.7	0.833	intron (NM_001017424, intron 1 of 6)	L1MC|LINE|L1	8746	8746	NM_001017424	3776	Hs.497745	NM_001017424	ENSG00000082482	KCNK2	KCNK2	K2p2.1|TPKC1|TREK|TREK-1|TREK1|hTREK-1c|hTREK-1e	potassium channel, subfamily K, member 2	protein-coding	4.7	0.833	10	10	2	4.94	5.11e-05	5.38	2.53e-05	0.97
chr3-136	chr3	178154295	178154435	+	4.8	0.647	intron (NR_046786, intron 1 of 2)	intron (NR_046786, intron 1 of 2)	17376	17376	NR_046786	100874330	Hs.201902	NR_046786		KCNMB2-IT1	KCNMB2-IT1	-	KCNMB2 intronic transcript 1 (non-protein coding)	miscRNA	4.8	0.647	10	9	1.8	5.09	9.58e-05	8.45	1.87e-06	0.97
chr19-30	chr19	44291941	44292081	+	5.3	0.833	Intergenic	L2a|LINE|L2	-6602	6602	NM_002250	3783	Hs.10082	NM_002250	ENSG00000104783	KCNN4	KCNN4	IK1|IKCA1|KCA4|KCa3.1|SK4|hIKCa1|hKCa4|hSK4	potassium intermediate/small conductance calcium-activated channel, subfamily N, member 4	protein-coding	5.3	0.833	10	10	1.8	5.66	1.66e-05	9.27	2.22e-07	0.97
chr20-406	chr20	62111185	62111325	+	5.3	0.909	Intergenic	Intergenic	-7262	7262	NM_172108	3785	Hs.652468	NM_004518	ENSG00000075043	KCNQ2	KCNQ2	BFNC|BFNS1|EBN|EBN1|EIEE7|ENB1|HNSPC|KCNA11|KV7.2|KVEBN1	potassium voltage-gated channel, KQT-like subfamily, member 2	protein-coding	5.3	0.909	10	10	1.8	5.66	1.66e-05	7.34	1.78e-06	0.97
chr6-276	chr6	73783804	73783944	+	4.8	0.714	intron (NM_001160130, intron 3 of 12)	L2a|LINE|L2	69363	69363	NR_046621	100873997	Hs.743196	NR_046621		KCNQ5-AS1	KCNQ5-AS1	-	KCNQ5 antisense RNA 1	miscRNA	4.8	0.714	9	9	1.8	5.09	9.58e-05	6.47	1.55e-05	0.97
chr20-302	chr20	43717480	43717620	+	5.3	0.625	Intergenic	LTR3B_|LTR|ERVK	12203	12203	NM_002251	3787	Hs.117780	NM_002251	ENSG00000124134	KCNS1	KCNS1	KV9.1	potassium voltage-gated channel, delayed-rectifier, subfamily S, member 1	protein-coding	5.3	0.625	10	10	2	5.03	4.45e-05	4.99	4.69e-05	0.97
chr8-118	chr8	111003021	111003163	+	5.1	0.8	Intergenic	Intergenic	-16133	16133	NM_014379	27012	Hs.13285	NM_014379	ENSG00000164794	KCNV1	KCNV1	HNKA|KCNB3|KV2.3|KV8.1	potassium channel, subfamily V, member 1	protein-coding	5.1	0.8	12	11	2.4	4.55	4.58e-05	4.44	5.7e-05	0.97
chr18-40	chr18	24237428	24237568	+	5.3	0.769	promoter-TSS (NM_001258222)	promoter-TSS (NM_001258222)	-133	133	NM_001258222	284252	Hs.526630	NM_001136205	ENSG00000134504	KCTD1	KCTD1	C18orf5	potassium channel tetramerisation domain containing 1	protein-coding	5.3	0.769	10	10	1.8	5.66	1.66e-05	9.52	1.75e-07	0.97
chr1-271	chr1	215748274	215748414	+	5.3	0.733	intron (NM_016121, intron 3 of 17)	AluSx1|SINE|Alu	7609	7609	NM_016121	51133	Hs.335139	NM_016121	ENSG00000136636	KCTD3	KCTD3	NY-REN-45	potassium channel tetramerisation domain containing 3	protein-coding	5.3	0.733	10	10	2	5.03	4.45e-05	4.99	4.69e-05	0.97
chr11-228	chr11	66888434	66888576	+	4.7	0.688	intron (NM_012308, intron 1 of 20)	intron (NM_012308, intron 1 of 20)	1765	1765	NR_027473	22992	Hs.124147	NM_001256405	ENSG00000173120	KDM2A	KDM2A	CXXC8|FBL11|FBL7|FBXL11|JHDM1A|LILINA	lysine (K)-specific demethylase 2A	protein-coding	4.7	0.688	10	10	2	4.94	5.11e-05	6.2	7.67e-06	0.97
chr12-189	chr12	121931185	121931325	+	4.8	0.833	intron (NM_001005366, intron 12 of 22)	intron (NM_001005366, intron 12 of 22)	87109	87109	NM_001005366	84678	Hs.524800	NM_001005366	ENSG00000089094	KDM2B	KDM2B	CXXC2|FBXL10|Fbl10|JHDM1B|PCCX2	lysine (K)-specific demethylase 2B	protein-coding	4.8	0.833	9	9	1.8	5.09	9.58e-05	10.18	3.74e-07	0.97
chr1-403	chr1	44126445	44126585	+	4.8	0.9	intron (NM_014663, intron 4 of 21)	intron (NM_014663, intron 4 of 21)	10718	10718	NM_014663	9682	Hs.155983	NM_014663	ENSG00000066135	KDM4A	KDM4A	JHDM3A|JMJD2|JMJD2A	lysine (K)-specific demethylase 4A	protein-coding	4.8	0.9	9	9	1.8	5.09	9.58e-05	10.18	3.74e-07	0.97
chr9-222	chr9	6849838	6849978	+	4.8	0.714	intron (NM_001146695, intron 5 of 17)	Tigger3a|DNA|TcMar-Tigger	92267	92267	NM_015061	23081	Hs.709425	NM_001146694	ENSG00000107077	KDM4C	KDM4C	GASC1|JHDM3C|JMJD2C|bA146B14.1	lysine (K)-specific demethylase 4C	protein-coding	4.8	0.714	9	9	1.8	5.09	9.58e-05	7.83	3.47e-06	0.97
chrX-37	chrX	44833992	44834134	+	5.1	0.75	intron (NM_021140, intron 4 of 28)	intron (NM_021140, intron 4 of 28)	101640	101640	NM_021140	7403	Hs.522616	NM_021140	ENSG00000147050	KDM6A	KDM6A	KABUK2|UTX|bA386N14.2	lysine (K)-specific demethylase 6A	protein-coding	5.1	0.75	11	11	2	5.44	9.23e-06	6.42	1.97e-06	0.97
chr6-277	chr6	73946540	73946680	+	4.8	0.818	Intergenic	Intergenic	-11435	11435	NM_001126063	100129128	Hs.663639	NM_001126063	ENSG00000256980	KHDC1L	KHDC1L	-	KH homology domain containing 1-like	protein-coding	4.8	0.818	9	9	1.8	5.09	9.58e-05	7.55	4.63e-06	0.97
chr6-264	chr6	62987673	62987813	+	4.8	0.9	intron (NM_152688, intron 1 of 8)	intron (NM_152688, intron 1 of 8)	8357	8357	NM_152688	202559	Hs.519794	NM_152688	ENSG00000112232	KHDRBS2	KHDRBS2	SLM-1|SLM1|bA535F17.1	KH domain containing, RNA binding, signal transduction associated 2	protein-coding	4.8	0.9	9	9	1.8	5.09	9.58e-05	10.18	3.74e-07	0.97
chr9-90	chr9	2815216	2815358	+	5.1	0.846	intron (NM_014878, intron 13 of 17)	intron (NM_014878, intron 13 of 17)	28843	28843	NM_014878	9933	Hs.493309	NM_001031691	ENSG00000080608	KIAA0020	KIAA0020	HLA-HA8|PEN|PUF6|XTP5|hPUF-A	KIAA0020	protein-coding	5.1	0.846	11	11	2	5.44	9.23e-06	6.06	3.38e-06	0.97
chr1-207	chr1	175161396	175161538	+	5.1	0.706	intron (NM_001162894, intron 1 of 3)	intron (NM_001162894, intron 1 of 3)	482	482	NM_001162895	9674	Hs.518138	NM_001162893	ENSG00000235750	KIAA0040	KIAA0040	-	KIAA0040	protein-coding	5.1	0.706	11	11	2	5.44	9.23e-06	7.01	8.56e-07	0.97
chr7-108	chr7	26580730	26580870	+	4.8	0.786	Intergenic	Intergenic	-2356	2356	NR_022006	9808	Hs.69749	NR_022006		KIAA0087	KIAA0087	-	KIAA0087	miscRNA	4.8	0.786	10	9	1.8	5.09	9.58e-05	10.18	3.74e-07	0.97
chr3-13	chr3	197445639	197445779	+	5.8	0.923	intron (NM_001145642, intron 1 of 20)	intron (NM_001145642, intron 1 of 20)	18064	18064	NM_014687	9711	Hs.478868	NM_014687	ENSG00000145016	KIAA0226	KIAA0226	RUBICON	KIAA0226	protein-coding	5.8	0.923	12	11	1.8	6.22	2.63e-06	9.81	3.18e-08	0.97
chr6-214	chr6	24647744	24647884	+	4.8	0.846	Intergenic	LTR65|LTR|ERV1	-1431	1431	NM_014809	9856	Hs.26441	NM_001168374	ENSG00000137261	KIAA0319	KIAA0319	DYLX2|DYX2	KIAA0319	protein-coding	4.8	0.846	9	9	1.8	5.09	9.58e-05	7.64	4.21e-06	0.97
chr14-310	chr14	35591575	35591715	+	4.8	0.588	promoter-TSS (NM_001256680)	promoter-TSS (NM_001256680)	-113	113	NM_001256680	9692	Hs.739309	NM_001256678	ENSG00000100890	KIAA0391	KIAA0391	MRPP3	KIAA0391	protein-coding	4.8	0.588	10	9	1.8	5.09	9.58e-05	5.71	4.05e-05	0.97
chr14-610	chr14	58879752	58879894	+	5.1	0.812	intron (NM_012460, intron 3 of 5)	Charlie5|DNA|hAT-Charlie	-14280	14280	NM_001244189	9786	Hs.232532	NM_001244189	ENSG00000100578	KIAA0586	KIAA0586	Talpid3	KIAA0586	protein-coding	5.1	0.812	11	11	2	5.44	9.23e-06	6.01	3.63e-06	0.97
chr7-188	chr7	36412157	36412299	+	4.7	0.786	intron (NM_001100425, intron 2 of 6)	intron (NM_001100425, intron 2 of 6)	-5350	5350	NM_001199708	23366	Hs.6224	NM_001100425	ENSG00000164542	KIAA0895	KIAA0895	-	KIAA0895	protein-coding	4.7	0.786	10	10	2	4.94	5.11e-05	8.79	3.58e-07	0.97
chr4-128	chr4	154407915	154408057	+	4.7	0.75	intron (NM_001131007, intron 3 of 34)	intron (NM_001131007, intron 3 of 34)	20488	20488	NM_015196	23240	Hs.732450	NM_001131007	ENSG00000121210	KIAA0922	KIAA0922	TMEM131L	KIAA0922	protein-coding	4.7	0.75	11	10	2	4.94	5.11e-05	7.98	8.47e-07	0.97
chr5-2	chr5	5419749	5419889	+	9.5	0.833	Intergenic	Intergenic	-2967	2967	NM_015325	23379	Hs.449296	NM_015325	ENSG00000164151	KIAA0947	KIAA0947	-	KIAA0947	protein-coding	9.5	0.833	19	18	3.3	5.43	1.61e-08	5.07	4.41e-08	0.94
chr4-313	chr4	123142754	123142894	+	4.8	0.643	intron (NM_015312, intron 20 of 83)	intron (NM_015312, intron 20 of 83)	51066	51066	NM_015312	84162	Hs.408142	NM_015312	ENSG00000138688	KIAA1109	KIAA1109	FSA|Tweek	KIAA1109	protein-coding	4.8	0.643	9	9	1.8	5.09	9.58e-05	6.28	1.96e-05	0.97
chr2-61	chr2	99529491	99529633	+	6.1	0.714	intron (NM_207362, intron 1 of 9)	intron (NM_207362, intron 1 of 9)	23122	23122	NM_207362	343990	Hs.469398	NM_207362	ENSG00000196872	KIAA1211L	KIAA1211L	C2orf55	KIAA1211-like	protein-coding	6.1	0.714	13	13	2	6.43	2.36e-07	5.82	7e-07	0.96
chr11-142	chr11	101733419	101733561	+	5.1	0.846	Intergenic	Intergenic	-52256	52256	NM_020802	57562	Hs.156352	NM_020802	ENSG00000110318	KIAA1377	KIAA1377	-	KIAA1377	protein-coding	5.1	0.846	11	11	2	5.44	9.23e-06	7.01	8.56e-07	0.97
chr1-119	chr1	232961270	232961410	+	5.8	0.846	Intergenic	L1M5|LINE|L1	20702	20702	NM_019090	54627	Hs.160373	NM_019090	ENSG00000212916	KIAA1383	KIAA1383	-	KIAA1383	protein-coding	5.8	0.846	11	11	1.8	6.22	2.63e-06	12.3	3.01e-09	0.97
chr9-88	chr9	5688492	5688632	+	4.8	0.765	intron (NM_020829, intron 2 of 25)	intron (NM_020829, intron 2 of 25)	59443	59443	NM_001206557	57589	Hs.661509	NM_001135920	ENSG00000107036	KIAA1432	KIAA1432	CIP150|bA207C16.1	KIAA1432	protein-coding	4.8	0.765	10	9	1.8	5.09	9.58e-05	5.76	3.78e-05	0.97
chr11-167	chr11	33611870	33612012	+	4.7	0.846	intron (NM_012194, intron 10 of 19)	intron (NM_012194, intron 10 of 19)	48064	48064	NM_012194	25758	Hs.502266	NM_012194	ENSG00000110427	KIAA1549L	KIAA1549L	C11orf41|C11orf69|G2	KIAA1549-like	protein-coding	4.7	0.846	10	10	2	4.94	5.11e-05	9.89	1.24e-07	0.97
chr10-208	chr10	118707213	118707353	+	4.8	0.769	intron (NM_001258298, intron 6 of 15)	intron (NM_001258298, intron 6 of 15)	57805	57805	NM_001258298	57698	Hs.501140	NM_001127211	ENSG00000187164	KIAA1598	KIAA1598	-	KIAA1598	protein-coding	4.8	0.769	9	9	1.8	5.09	9.58e-05	8.93	1.2e-06	0.97
chr16-508	chr16	84499250	84499390	+	4.8	0.588	Intergenic	Intergenic	38968	38968	NM_020947	57707	Hs.288274	NM_020947	ENSG00000140950	KIAA1609	KIAA1609	-	KIAA1609	protein-coding	4.8	0.588	9	9	1.8	5.09	9.58e-05	5.71	4.05e-05	0.97
chr13-72	chr13	45611872	45612014	+	4.7	0.909	Intergenic	Intergenic	48256	48256	NM_018559	55425	Hs.741361	NM_018559	ENSG00000133114	KIAA1704	KIAA1704	LSR7|RP11-245H20.2|bA245H20.2	KIAA1704	protein-coding	4.7	0.909	10	10	2	4.94	5.11e-05	9.26	2.24e-07	0.97
chr2-505	chr2	176843592	176843732	+	4.8	0.9	intron (NM_030650, intron 5 of 12)	L2|LINE|L2	23356	23356	NM_030650	80856	Hs.209561	NM_030650	ENSG00000144320	KIAA1715	KIAA1715	LNP|Ul|ulnaless	KIAA1715	protein-coding	4.8	0.9	9	9	1.8	5.09	9.58e-05	10.18	3.74e-07	0.97
chr20-267	chr20	36851346	36851486	+	5.3	0.769	intron (NM_001029864, intron 9 of 13)	L2b|LINE|L2	37758	37758	NM_001029864	85449	Hs.472690	NM_001029864	ENSG00000149633	KIAA1755	KIAA1755	-	KIAA1755	protein-coding	5.3	0.769	10	10	2	5.03	4.45e-05	5.55	1.97e-05	0.97
chr1-323	chr1	233483719	233483859	+	5.3	0.769	intron (NM_032435, intron 2 of 9)	L1MB8|LINE|L1	20275	20275	NM_032435	84451	Hs.547779	NM_032435	ENSG00000143674	KIAA1804	KIAA1804	MLK4|RP5-862P8.2|dJ862P8.3	mixed lineage kinase 4	protein-coding	5.3	0.769	10	10	1.8	5.66	1.66e-05	6.58	4.58e-06	0.97
chr1-59	chr1	11968019	11968159	+	5.3	0.667	Intergenic	Intergenic	18396	18396	NM_138346	90231	Hs.520094	NM_138346	ENSG00000116685	KIAA2013	KIAA2013	-	KIAA2013	protein-coding	5.3	0.667	11	10	2	5.03	4.45e-05	11.32	3.31e-08	0.97
chr6-99	chr6	17878352	17878492	+	5.3	0.786	intron (NM_001105568, intron 3 of 37)	L2a|LINE|L2	109432	109432	NM_001105568	63971	Hs.94499	NM_001105566	ENSG00000137177	KIF13A	KIF13A	RBKIN|bA500C11.2	kinesin family member 13A	protein-coding	5.3	0.786	10	10	1.8	5.66	1.66e-05	8	8.26e-07	0.97
chr8-573	chr8	29147303	29147445	+	4.7	0.833	Intergenic	AluJb|SINE|Alu	-26764	26764	NM_015254	23303	Hs.444767	NM_015254	ENSG00000197892	KIF13B	KIF13B	GAKIN	kinesin family member 13B	protein-coding	4.7	0.833	10	10	2	4.94	5.11e-05	7.55	1.39e-06	0.97
chr17-177	chr17	43023876	43024018	+	5.1	0.7	intron (NM_001264573, intron 1 of 14)	MIR|SINE|MIR	1132	1132	NM_001265577	146909	Hs.135094	NM_001080443	ENSG00000186185	KIF18B	KIF18B	-	kinesin family member 18B	protein-coding	5.1	0.7	11	11	2	5.44	9.23e-06	6.26	2.49e-06	0.97
chr1-890	chr1	245804257	245804397	+	4.8	0.692	intron (NM_018012, intron 9 of 14)	L1MA5|LINE|L1	486040	486040	NM_018012	55083	Hs.368096	NM_018012	ENSG00000162849	KIF26B	KIF26B	-	kinesin family member 26B	protein-coding	4.8	0.692	9	9	1.8	5.09	9.58e-05	6.89	9.49e-06	0.97
chr5-3362	chr5	61324389	61324529	+	4.8	0.846	Intergenic	Intergenic	-277530	277530	NM_001243953	3796	Hs.558351	NM_001098511	ENSG00000068796	KIF2A	KIF2A	HK2|KIF2	kinesin heavy chain member 2A	protein-coding	4.8	0.846	10	9	1.8	5.09	9.58e-05	10.18	3.74e-07	0.97
chr17-351	chr17	51832297	51832437	+	4.8	0.909	Intergenic	L1M5|LINE|L1	-67872	67872	NM_032559	84643	Hs.741893	NM_032559	ENSG00000141200	KIF2B	KIF2B	-	kinesin family member 2B	protein-coding	4.8	0.909	9	9	1.8	5.09	9.58e-05	10.18	3.74e-07	0.97
chr20-407	chr20	30859827	30859969	+	4.7	0.688	Intergenic	Intergenic	-5556	5556	NM_004798	9371	Hs.369670	NM_004798	ENSG00000101350	KIF3B	KIF3B	FLA8|HH0048|KLP-11	kinesin family member 3B	protein-coding	4.7	0.688	10	10	2	4.94	5.11e-05	5.55	1.94e-05	0.97
chr16-236	chr16	57836713	57836855	+	4.7	0.786	promoter-TSS (NM_005550)	promoter-TSS (NM_005550)	-345	345	NM_005550	3801	Hs.23131	NM_001130099	ENSG00000140859	KIFC3	KIFC3	-	kinesin family member C3	protein-coding	4.7	0.786	10	10	2	4.94	5.11e-05	5.18	3.47e-05	0.97
chr1-204	chr1	157989202	157989344	+	4.7	0.786	intron (NM_018240, intron 1 of 14)	intron (NM_018240, intron 1 of 14)	26210	26210	NM_018240	55243	Hs.657006	NM_018240	ENSG00000183853	KIRREL	KIRREL	NEPH1	kin of IRRE like (Drosophila)	protein-coding	4.7	0.786	11	10	2	4.94	5.11e-05	5.6	1.82e-05	0.97
chr13-59	chr13	33559278	33559420	+	4.7	0.769	Intergenic	Intergenic	-31222	31222	NM_004795	9365	Hs.524953	NM_004795	ENSG00000133116	KL	KL	-	klotho	protein-coding	4.7	0.769	10	10	2	4.94	5.11e-05	6.68	4.05e-06	0.97
chr11-47	chr11	65989931	65990071	+	5.8	0.706	intron (NM_018026, intron 10 of 23)	intron (NM_018026, intron 10 of 23)	-34764	34764	NM_001134775	64837	Hs.280792	NM_001134774	ENSG00000174996	KLC2	KLC2	-	kinesin light chain 2	protein-coding	5.8	0.706	11	11	1.8	6.22	2.63e-06	9.01	7.4e-08	0.97
chr9-385	chr9	110517954	110518096	+	4.7	0.647	Intergenic	MLT2C1|LTR|ERVL	-265978	265978	NM_004235	9314	Hs.376206	NM_004235	ENSG00000136826	KLF4	KLF4	EZF|GKLF	Kruppel-like factor 4 (gut)	protein-coding	4.7	0.647	10	10	2	4.94	5.11e-05	5.88	1.2e-05	0.97
chr13-111	chr13	73803543	73803683	+	4.8	0.769	Intergenic	MLT1J|LTR|ERVL-MaLR	170471	170471	NM_001730	688	Hs.508234	NM_001730	ENSG00000102554	KLF5	KLF5	BTEB2|CKLF|IKLF	Kruppel-like factor 5 (intestinal)	protein-coding	4.8	0.769	9	9	1.8	5.09	9.58e-05	5.42	6.03e-05	0.97
chrX-151	chrX	56274892	56275032	+	4.8	0.818	intron (NM_001159296, intron 2 of 5)	intron (NM_001159296, intron 2 of 5)	16092	16092	NM_001159296	11279	Hs.646614	NM_001159296	ENSG00000102349	KLF8	KLF8	BKLF3|ZNF741	Kruppel-like factor 8	protein-coding	4.8	0.818	9	9	1.8	5.09	9.58e-05	10.18	3.74e-07	0.97
chr9-348	chr9	73029491	73029631	+	4.8	0.714	promoter-TSS (NM_001206)	promoter-TSS (NM_001206)	12	12	NM_001206	687	Hs.602267	NM_001206	ENSG00000119138	KLF9	KLF9	BTEB|BTEB1	Kruppel-like factor 9	protein-coding	4.8	0.714	9	9	1.8	5.09	9.58e-05	8.57	1.68e-06	0.97
chr14-365	chr14	50218296	50218436	+	5.3	0.786	exon (NM_172193, exon 13 of 13)	exon (NM_172193, exon 13 of 13)	-16421	16421	NM_014315	23588	Hs.509264	NM_014315	ENSG00000165516	KLHDC2	KLHDC2	HCLP-1|LCP	kelch domain containing 2	protein-coding	5.3	0.786	10	10	2	5.03	4.45e-05	4.7	7.77e-05	0.97
chr16-99	chr16	87832742	87832884	+	5.6	0.875	Intergenic	MLT1C|LTR|ERVL-MaLR	-33215	33215	NM_001184856	54758	Hs.123450	NM_001184854	ENSG00000104731	KLHDC4	KLHDC4	-	kelch domain containing 4	protein-coding	5.6	0.875	12	12	2.4	4.96	9.07e-06	7.31	1.78e-07	0.96
chr13-27	chr13	70981941	70982083	+	5.1	0.647	Intergenic	Intergenic	-299387	299387	NM_020866	57626	Hs.508201	NM_020866	ENSG00000150361	KLHL1	KLHL1	MRP2	kelch-like 1 (Drosophila)	protein-coding	5.1	0.647	11	11	2	5.44	9.23e-06	5.97	3.91e-06	0.97
chrX-290	chrX	117184809	117184949	+	4.8	0.625	intron (NM_001168301, intron 1 of 7)	MER5A|DNA|hAT-Charlie	-65503	65503	NM_001168299	90293	Hs.348262	NM_001168299	ENSG00000003096	KLHL13	KLHL13	BKLHD2	kelch-like 13 (Drosophila)	protein-coding	4.8	0.625	9	9	1.8	5.09	9.58e-05	7.46	5.08e-06	0.97
chr6-110	chr6	53482241	53482381	+	5.3	0.706	Intergenic	Intergenic	48195	48195	NM_001003760	401265	Hs.131064	NM_001003760	ENSG00000124743	KLHL31	KLHL31	BKLHD6|KBTBD1|KLHL|bA345L23.2	kelch-like 31 (Drosophila)	protein-coding	5.3	0.706	10	10	2	5.03	4.45e-05	5.3	2.89e-05	0.97
chr16-70	chr16	84678556	84678698	+	5.6	0.867	Intergenic	MIR|SINE|MIR	-3504	3504	NM_024731	79786	Hs.578546	NM_024731	ENSG00000135686	KLHL36	KLHL36	C16orf44	kelch-like 36 (Drosophila)	protein-coding	5.6	0.867	13	12	2	5.93	1.53e-06	5.52	3.18e-06	0.96
chrX-42	chrX	86779475	86779617	+	5.1	0.75	intron (NM_057162, intron 1 of 10)	L1MC3|LINE|L1	6831	6831	NM_057162	56062	Hs.49075	NM_019117	ENSG00000102271	KLHL4	KLHL4	DKELCHL|KHL4	kelch-like 4 (Drosophila)	protein-coding	5.1	0.75	11	11	2	5.44	9.23e-06	5.62	6.87e-06	0.97
chr3-47	chr3	183234519	183234659	+	5.8	0.8	intron (NM_130446, intron 2 of 6)	intron (NM_130446, intron 2 of 6)	38910	38910	NM_130446	89857	Hs.659147	NM_130446	ENSG00000172578	KLHL6	KLHL6	-	kelch-like 6 (Drosophila)	protein-coding	5.8	0.8	11	11	1.8	6.22	2.63e-06	12.1	3.52e-09	0.97
chr19-68	chr19	51598632	51598772	+	4.8	0.818	Intergenic	MIR|SINE|MIR	-11200	11200	NM_022046	43847	Hs.283925	NM_022046	ENSG00000129437	KLK14	KLK14	KLK-L6	kallikrein-related peptidase 14	protein-coding	4.8	0.818	9	9	1.8	5.09	9.58e-05	8.93	1.2e-06	0.97
chr12-56	chr12	10471580	10471722	+	4.7	0.846	Intergenic	MER58A|DNA|hAT-Charlie	11234	11234	NM_002262	3824	Hs.562457	NM_001114396	ENSG00000134539	KLRD1	KLRD1	CD94	killer cell lectin-like receptor subfamily D, member 1	protein-coding	4.7	0.846	10	10	2	4.94	5.11e-05	9.89	1.24e-07	0.97
chr12-14	chr12	9950905	9951045	+	5.8	0.706	Intergenic	Intergenic	-29102	29102	NM_016523	51348	Hs.183125	NM_016523	ENSG00000150045	KLRF1	KLRF1	CLEC5C|NKp80	killer cell lectin-like receptor subfamily F, member 1	protein-coding	5.8	0.706	11	11	1.8	6.22	2.63e-06	10.76	1.26e-08	0.97
chr12-15	chr12	10508787	10508927	+	5.8	0.786	Intergenic	L1MD1|LINE|L1	33796	33796	NM_007360	22914	Hs.387787	NM_007360	ENSG00000213809	KLRK1	KLRK1	CD314|D12S2489E|KLR|NKG2-D|NKG2D	killer cell lectin-like receptor subfamily K, member 1	protein-coding	5.8	0.786	11	11	2	5.53	7.92e-06	11.92	4.12e-09	0.97
chr1-316	chr1	241694357	241694499	+	5.1	0.722	Intergenic	Intergenic	-1006	1006	NM_003679	8564	Hs.741284	NM_003679	ENSG00000117009	KMO	KMO	dJ317G22.1	kynurenine 3-monooxygenase (kynurenine 3-hydroxylase)	protein-coding	5.1	0.722	11	11	2.4	4.55	4.58e-05	4.27	8.07e-05	0.97
chr17-145	chr17	45698233	45698373	+	5.3	0.688	intron (NM_006310, intron 22 of 22)	AluJb|SINE|Alu	-28972	28972	NM_002265	3837	Hs.532793	NM_002265	ENSG00000108424	KPNB1	KPNB1	IMB1|IPO1|IPOB|Impnb|NTF97	karyopherin (importin) beta 1	protein-coding	5.3	0.688	10	10	2	5.03	4.45e-05	5.92	1.14e-05	0.97
chr2-303	chr2	88327002	88327142	+	4.8	0.909	3' UTR (NM_016618, exon 4 of 4)	3' UTR (NM_016618, exon 4 of 4)	28176	28176	NM_016618	51315	Hs.469254	NM_016618	ENSG00000172086	KRCC1	KRCC1	CHBP2	lysine-rich coiled-coil 1	protein-coding	4.8	0.909	9	9	1.8	5.09	9.58e-05	10.18	3.74e-07	0.97
chr17-281	chr17	38977243	38977383	+	4.8	0.909	exon (NM_000421, exon 2 of 8)	exon (NM_000421, exon 2 of 8)	1550	1550	NM_000421	3858	Hs.99936	NM_000421	ENSG00000186395	KRT10	KRT10	BCIE|BIE|CK10|EHK|K10|KPP	keratin 10	protein-coding	4.8	0.909	9	9	1.8	5.09	9.58e-05	5.37	6.43e-05	0.97
chr17-331	chr17	38842584	38842726	+	4.7	0.833	Intergenic	Intergenic	17347	17347	NM_019016	192666	Hs.87383	NM_019016	ENSG00000167916	KRT24	KRT24	K24|KA24	keratin 24	protein-coding	4.7	0.833	10	10	2	4.94	5.11e-05	7.16	2.21e-06	0.97
chr17-73	chr17	38924127	38924269	+	5.6	0.722	intron (NM_181539, intron 6 of 7)	intron (NM_181539, intron 6 of 7)	4213	4213	NM_181539	353288	Hs.592133	NM_181539	ENSG00000186393	KRT26	KRT26	CK26|K25IRS2|K26|KRT25B	keratin 26	protein-coding	5.6	0.722	12	12	2.4	4.96	9.07e-06	7	2.78e-07	0.96
chr17-24	chr17	39117567	39117709	+	6.6	0.81	intron (NM_213656, intron 5 of 6)	MIRc|SINE|MIR	5506	5506	NM_213656	390792	Hs.28467	NM_213656	ENSG00000196859	KRT39	KRT39	CK-39|K39|KA35	keratin 39	protein-coding	6.6	0.81	14	14	3.2	4.34	7.56e-06	3.95	2.13e-05	0.96
chr12-95	chr12	52975653	52975795	+	4.7	0.667	Intergenic	MIRb|SINE|MIR	-8115	8115	NM_175053	121391	Hs.660125	NM_175053	ENSG00000170484	KRT74	KRT74	HTSS2|K6IRS4|KRT5C|KRT6IRS4	keratin 74	protein-coding	4.7	0.667	10	10	2	4.94	5.11e-05	5.55	1.94e-05	0.97
chr12-93	chr12	52583380	52583522	+	4.7	0.625	intron (NM_182507, intron 1 of 8)	intron (NM_182507, intron 1 of 8)	2333	2333	NM_182507	144501	Hs.140978	NM_001081492	ENSG00000167767	KRT80	KRT80	KB20	keratin 80	protein-coding	4.7	0.625	10	10	2	4.94	5.11e-05	4.63	8.72e-05	0.97
chr17-35	chr17	39177066	39177206	+	5.8	0.75	Intergenic	ERVL-E-int|LTR|ERVL	6318	6318	NM_031957	83895	Hs.534499	NM_031957	ENSG00000221852	KRTAP1-5	KRTAP1-5	KAP1.5|KRTAP1.5	keratin associated protein 1-5	protein-coding	5.8	0.75	12	11	1.8	6.22	2.63e-06	4.97	2.1e-05	0.97
chr21-48	chr21	32090888	32091028	+	5.3	0.714	exon (NM_001164435, exon 1 of 1)	exon (NM_001164435, exon 1 of 1)	137	137	NM_001164435	100288323	Hs.580877	NM_001164435	ENSG00000231068	KRTAP21-3	KRTAP21-3	-	keratin associated protein 21-3	protein-coding	5.3	0.714	10	10	1.8	5.66	1.66e-05	8.92	3.15e-07	0.97
chr17-76	chr17	39165530	39165672	+	5.6	0.75	promoter-TSS (NM_031958)	promoter-TSS (NM_031958)	-235	235	NM_031958	83896	Hs.307027	NM_031958	ENSG00000212901	KRTAP3-1	KRTAP3-1	KAP3.1|KRTAP3.1	keratin associated protein 3-1	protein-coding	5.6	0.75	12	12	2.4	4.96	9.07e-06	4.43	2.72e-05	0.96
chr17-342	chr17	39281346	39281488	+	4.7	0.611	promoter-TSS (NM_031854)	promoter-TSS (NM_031854)	-998	998	NM_031854	83755	Hs.572443	NM_031854	ENSG00000213416	KRTAP4-12	KRTAP4-12	KAP4.12|KRTAP4.12	keratin associated protein 4-12	protein-coding	4.7	0.611	10	10	2	4.94	5.11e-05	5.55	1.94e-05	0.97
chr17-60	chr17	39293464	39293604	+	5.8	0.786	Intergenic	L1MEg|LINE|L1	3205	3205	NM_030976	81871	Hs.307014	NM_030976	ENSG00000198090	KRTAP4-6	KRTAP4-6	KAP4.15|KAP4.6|KRTAP4-15|KRTAP4.15	keratin associated protein 4-6	protein-coding	5.8	0.786	11	11	2	5.53	7.92e-06	6.62	1.47e-06	0.97
chr11-151	chr11	1714852	1714994	+	4.7	0.647	intron (NM_053005, intron 1 of 5)	intron (NM_053005, intron 1 of 5)	-3502	3502	NM_001012416	440023	Hs.534863	NM_001012416	ENSG00000205864	KRTAP5-6	KRTAP5-6	KRTAP5.6	keratin associated protein 5-6	protein-coding	4.7	0.647	10	10	2	4.94	5.11e-05	8.07	7.65e-07	0.97
chr17-266	chr17	25799039	25799181	+	4.7	0.714	promoter-TSS (NM_014238)	promoter-TSS (NM_014238)	74	74	NM_014238	8844	Hs.133534	NM_014238	ENSG00000141068	KSR1	KSR1	KSR|RSU2	kinase suppressor of ras 1	protein-coding	4.7	0.714	10	10	2	4.94	5.11e-05	5.93	1.11e-05	0.97
chr14-11	chr14	56073038	56073178	+	7.4	0.818	intron (NM_001271014, intron 2 of 43)	intron (NM_001271014, intron 2 of 43)	26183	26183	NR_073128	3895	Hs.509414	NM_001271014	ENSG00000126777	KTN1	KTN1	CG1|KNT|MU-RMS-40.19	kinectin 1 (kinesin receptor)	protein-coding	7.4	0.818	15	14	2.7	5.28	8.37e-07	4.93	1.83e-06	0.95
chr14-38	chr14	56002839	56002981	+	7	0.667	Intergenic	Intergenic	43900	43900	NR_027123	100129075	Hs.633724	NR_027123		KTN1-AS1	KTN1-AS1	C14orf33	KTN1 antisense RNA 1	miscRNA	7	0.667	15	15	4	3.72	2.16e-05	5.57	1.77e-07	0.95
chr2-73	chr2	143710652	143710792	+	5.8	0.8	intron (NM_001199241, intron 5 of 14)	LTR47A|LTR|ERVL	75527	75527	NM_001199241	8942	Hs.470126	NM_001032998	ENSG00000115919	KYNU	KYNU	-	kynureninase	protein-coding	5.8	0.8	12	11	2	5.53	7.92e-06	8.15	1.97e-07	0.97
chr14-207	chr14	50772136	50772278	+	5.1	0.812	intron (NM_024884, intron 1 of 9)	intron (NM_024884, intron 1 of 9)	6740	6740	NM_024884	79944	Hs.256034	NM_024884	ENSG00000087299	L2HGDH	L2HGDH	C14orf160	L-2-hydroxyglutarate dehydrogenase	protein-coding	5.1	0.812	12	11	2.4	4.55	4.58e-05	4.31	7.32e-05	0.97
chr8-42	chr8	71578433	71578575	+	5.6	0.789	intron (NM_016027, intron 1 of 6)	L2b|LINE|L2	2943	2943	NM_016027	51110	Hs.118554	NM_016027	ENSG00000147592	LACTB2	LACTB2	-	lactamase, beta 2	protein-coding	5.6	0.789	13	12	2	5.93	1.53e-06	8.09	6.07e-08	0.96
chr18-89	chr18	21301120	21301260	+	4.8	0.75	intron (NM_198129, intron 2 of 74)	MLT2D|LTR|ERVL	31628	31628	NM_001127717	3909	Hs.436367	NM_000227	ENSG00000053747	LAMA3	LAMA3	BM600|E170|LAMNA|LOCS|lama3a	laminin, alpha 3	protein-coding	4.8	0.75	9	9	1.8	5.09	9.58e-05	6.15	2.28e-05	0.97
chr6-57	chr6	112619188	112619328	+	5.8	0.733	Intergenic	Intergenic	-43341	43341	NM_001105209	3910	Hs.654572	NM_001105206	ENSG00000112769	LAMA4	LAMA4	LAMA3|LAMA4*-1	laminin, alpha 4	protein-coding	5.8	0.733	11	11	1.8	6.22	2.63e-06	8.07	2.18e-07	0.97
chr20-402	chr20	60936043	60936183	+	5.3	0.667	intron (NM_005560, intron 2 of 79)	intron (NM_005560, intron 2 of 79)	6255	6255	NM_005560	3911	Hs.473256	NM_005560	ENSG00000130702	LAMA5	LAMA5	-	laminin, alpha 5	protein-coding	5.3	0.667	10	10	2	5.03	4.45e-05	4.86	5.9e-05	0.97
chr7-181	chr7	107588882	107589022	+	5.3	0.8	intron (NM_002291, intron 24 of 33)	intron (NM_002291, intron 24 of 33)	54852	54852	NM_002291	3912	Hs.650585	NM_002291	ENSG00000091136	LAMB1	LAMB1	CLM	laminin, beta 1	protein-coding	5.3	0.8	10	10	1.8	5.66	1.66e-05	6.02	9.84e-06	0.97
chr3-115	chr3	182890098	182890240	+	5.1	0.786	Intergenic	L1MCc|LINE|L1	-9502	9502	NM_014398	27074	Hs.518448	NM_014398	ENSG00000078081	LAMP3	LAMP3	CD208|DC LAMP|DC-LAMP|DCLAMP|LAMP|LAMP-3|TSC403	lysosomal-associated membrane protein 3	protein-coding	5.1	0.786	11	11	2	5.44	9.23e-06	10.87	1.13e-08	0.97
chr8-644	chr8	98776095	98776235	+	4.8	0.9	Intergenic	AluJb|SINE|Alu	-11644	11644	NM_018407	55353	Hs.492314	NM_018407	ENSG00000104341	LAPTM4B	LAPTM4B	LAPTM4beta|LC27	lysosomal protein transmembrane 4 beta	protein-coding	4.8	0.9	9	9	1.8	5.09	9.58e-05	10.18	3.74e-07	0.97
chr5-3553	chr5	154071960	154072102	+	5.1	0.8	Intergenic	Intergenic	-20431	20431	NM_015315	23367	Hs.292078	NM_033551	ENSG00000155506	LARP1	LARP1	LARP	La ribonucleoprotein domain family, member 1	protein-coding	5.1	0.8	11	11	2	5.44	9.23e-06	9.43	4.71e-08	0.97
chr12-17	chr12	50794249	50794391	+	5.6	0.923	promoter-TSS (NM_199190)	promoter-TSS (NM_199190)	-272	272	NM_001170803	113251	Hs.26613	NM_001170803	ENSG00000161813	LARP4	LARP4	-	La ribonucleoprotein domain family, member 4	protein-coding	5.6	0.923	12	12	2.4	4.96	9.07e-06	8.41	3.98e-08	0.96
chr1-125	chr1	225616767	225616909	+	4.7	0.684	promoter-TSS (NM_194442)	promoter-TSS (NM_194442)	-281	281	NM_194442	3930	Hs.735694	NM_002296	ENSG00000143815	LBR	LBR	DHCR14B|LMN2R|PHA	lamin B receptor	protein-coding	4.7	0.684	12	10	2	4.94	5.11e-05	5.03	4.42e-05	0.97
chr6-284	chr6	80130845	80130985	+	4.8	0.643	Intergenic	Intergenic	116232	116232	NM_181714	167691	Hs.21945	NM_001122769	ENSG00000135338	LCA5	LCA5	C6orf152	Leber congenital amaurosis 5	protein-coding	4.8	0.643	9	9	1.8	5.09	9.58e-05	6.97	8.71e-06	0.97
chr19-19	chr19	11206459	11206599	+	6.3	0.857	intron (NM_001195799, intron 1 of 16)	MIR|SINE|MIR	6491	6491	NM_001195800	3949	Hs.741248	NM_000527	ENSG00000130164	LDLR	LDLR	FH|FHC|LDLCQ2	low density lipoprotein receptor	protein-coding	6.3	0.857	12	12	2	6.03	1.29e-06	8.54	3.41e-08	0.96
chr3-298	chr3	189850106	189850248	+	4.7	0.667	Intergenic	Intergenic	-9951	9951	NM_001134418	55214	Hs.374191	NM_001134418	ENSG00000090530	LEPREL1	LEPREL1	MCVD|MLAT4|P3H2	leprecan-like 1	protein-coding	4.7	0.667	10	10	2	4.94	5.11e-05	8.26	6.2e-07	0.97
chr14-580	chr14	55627919	55628061	+	5.1	0.667	intron (NM_001146015, intron 13 of 19)	intron (NM_001146015, intron 13 of 19)	24289	24289	NR_003225	3958	Hs.531081	NM_001177388	ENSG00000131981	LGALS3	LGALS3	CBP35|GAL3|GALBP|GALIG|L31|LGALS2|MAC2	lectin, galactoside-binding, soluble, 3	protein-coding	5.1	0.667	11	11	2.4	4.55	4.58e-05	4.39	6.3e-05	0.97
chr1-702	chr1	236629667	236629809	+	4.7	0.714	intron (NM_080738, intron 4 of 5)	intron (NM_080738, intron 4 of 5)	-51776	51776	NM_201545	3964	Hs.735982	NM_006499	ENSG00000116977	LGALS8	LGALS8	Gal-8|PCTA-1|PCTA1|Po66-CBP	lectin, galactoside-binding, soluble, 8	protein-coding	4.7	0.714	10	10	2	4.94	5.11e-05	5.38	2.53e-05	0.97
chr1-830	chr1	236693806	236693946	+	4.8	0.647	intron (NM_201543, intron 3 of 10)	intron (NM_201543, intron 3 of 10)	-6068	6068	NR_034040	100287902	Hs.677376	NR_034040		LGALS8-AS1	LGALS8-AS1	-	LGALS8 antisense RNA 1	miscRNA	4.8	0.647	9	9	1.8	5.09	9.58e-05	6.74	1.12e-05	0.97
chr17-218	chr17	25879149	25879289	+	4.8	0.769	intron (NM_014238, intron 3 of 20)	L2a|LINE|L2	-78955	78955	NR_024043	3965	Hs.81337	NM_002308	ENSG00000168961	LGALS9	LGALS9	HUAT|LGALS9A	lectin, galactoside-binding, soluble, 9	protein-coding	4.8	0.769	9	9	1.8	5.09	9.58e-05	6.28	1.96e-05	0.97
chr17-144	chr17	35237755	35237897	+	4.7	0.786	Intergenic	Intergenic	-56946	56946	NM_005568	3975	Hs.443727	NM_005568	ENSG00000132130	LHX1	LHX1	LIM-1|LIM1	LIM homeobox 1	protein-coding	4.7	0.786	11	10	2	4.94	5.11e-05	9.78	1.37e-07	0.97
chr9-161	chr9	126886112	126886252	+	5.3	0.625	Intergenic	Intergenic	112293	112293	NM_004789	9355	Hs.696425	NM_004789	ENSG00000106689	LHX2	LHX2	LH2|hLhx2	LIM homeobox 2	protein-coding	5.3	0.625	10	10	1.8	5.66	1.66e-05	7.57	1.35e-06	0.97
chr4-56	chr4	39461160	39461302	+	5.1	0.765	promoter-TSS (NM_000661)	promoter-TSS (NM_000661)	566	566	NM_006859	11019	Hs.550502	NM_006859	ENSG00000121897	LIAS	LIAS	LAS|LIP1|LS|PDHLD	lipoic acid synthetase	protein-coding	5.1	0.765	12	11	2.4	4.55	4.58e-05	6.42	1.97e-06	0.97
chr22-26	chr22	30608486	30608626	+	4.8	0.75	Intergenic	L2b|LINE|L2	34284	34284	NM_001257135	3976	Hs.2250	NM_001257135	ENSG00000128342	LIF	LIF	CDF|DIA|HILDA|MLPLI	leukemia inhibitory factor	protein-coding	4.8	0.75	9	9	1.8	5.09	9.58e-05	6.15	2.28e-05	0.97
chr5-189	chr5	38600689	38600831	+	6.6	0.72	Intergenic	L2|LINE|L2	-5253	5253	NM_002310	3977	Hs.133421	NM_001127671	ENSG00000113594	LIFR	LIFR	CD118|LIF-R|SJS2|STWS|SWS	leukemia inhibitory factor receptor alpha	protein-coding	6.6	0.72	15	14	2.4	5.79	2.83e-07	3.6	5.7e-05	0.96
chr4-211	chr4	41521306	41521446	+	4.8	0.9	intron (NM_001112718, intron 2 of 25)	intron (NM_001112718, intron 2 of 25)	-93543	93543	NM_001112719	22998	Hs.335163	NM_001112717	ENSG00000064042	LIMCH1	LIMCH1	LIMCH1A|LMO7B	LIM and calponin homology domains 1	protein-coding	4.8	0.9	9	9	1.8	5.09	9.58e-05	6.6	1.32e-05	0.97
chr11-75	chr11	27527724	27527864	+	4.8	0.733	promoter-TSS (NR_033314)	promoter-TSS (NR_033314)	532	532	NM_018362	55327	Hs.91393	NM_018362	ENSG00000148943	LIN7C	LIN7C	LIN-7-C|LIN-7C|MALS-3|MALS3|VELI3	lin-7 homolog C (C. elegans)	protein-coding	4.8	0.733	10	9	1.8	5.09	9.58e-05	7.04	7.98e-06	0.97
chr1-64	chr1	226456196	226456338	+	6.1	0.824	intron (NM_173083, intron 7 of 14)	MER68|LTR|ERVL	40937	40937	NM_001270409	286826	Hs.120817	NM_001270409	ENSG00000183814	LIN9	LIN9	BARA|BARPsv|Lin-9|TGS|TGS1|TGS2	lin-9 homolog (C. elegans)	protein-coding	6.1	0.824	13	13	3.2	4.03	3.35e-05	8.85	6.13e-09	0.96
chr21-85	chr21	26656000	26656140	+	4.8	0.692	Intergenic	Intergenic	147943	147943	NR_024027	54072	Hs.234016	NM_058184		LINC00158	LINC00158	C21orf42|NCRNA00158	long intergenic non-protein coding RNA 158	miscRNA	4.8	0.692	9	9	1.8	5.09	9.58e-05	7.83	3.47e-06	0.97
chr1-121	chr1	234793462	234793602	+	5.8	0.632	Intergenic	Intergenic	28475	28475	NR_033927	100302691	Hs.209162	NR_033927		LINC00184	LINC00184	HANC|NCRNA00184	long intergenic non-protein coding RNA 184	miscRNA	5.8	0.632	11	11	2	5.53	7.92e-06	5.38	1.02e-05	0.97
chr21-18	chr21	30554836	30554978	+	7	0.682	Intergenic	Intergenic	-10908	10908	NR_027072	193629	Hs.720711	NR_027072		LINC00189	LINC00189	C21orf109|NCRNA00189	long intergenic non-protein coding RNA 189	miscRNA	7	0.682	15	15	2.4	6.21	4.51e-08	7.95	1.8e-09	0.95
chr22-34	chr22	44983903	44984045	+	4.7	0.909	Intergenic	HAL1b|LINE|L1	18754	18754	NR_028411	388910	Hs.332685	NM_001012986		LINC00207	LINC00207	NCRNA00207	long intergenic non-protein coding RNA 207	miscRNA	4.7	0.909	10	10	2	4.94	5.11e-05	9.89	1.24e-07	0.97
chr6-273	chr6	135859217	135859359	+	4.7	0.909	intron (NR_026805, intron 1 of 3)	intron (NR_026805, intron 1 of 3)	40349	40349	NR_026805	100131814	Hs.734007	NR_026805		LINC00271	LINC00271	C6orf217|NCRNA00271	long intergenic non-protein coding RNA 271	miscRNA	4.7	0.909	10	10	2	4.94	5.11e-05	9.02	2.85e-07	0.97
chr13-74	chr13	44551127	44551267	+	4.8	0.818	Intergenic	Intergenic	-45274	45274	NR_026955	121838	Hs.201441	NR_026955		LINC00284	LINC00284	NCRNA00284	long intergenic non-protein coding RNA 284	miscRNA	4.8	0.818	9	9	1.8	5.09	9.58e-05	10.18	3.74e-07	0.97
chr4-143	chr4	181990533	181990673	+	4.8	0.909	intron (NR_033918, intron 2 of 2)	intron (NR_033918, intron 2 of 2)	89699	89699	NR_033918	728081	Hs.535735	NR_033918		LINC00290	LINC00290	NCRNA00290	long intergenic non-protein coding RNA 290	miscRNA	4.8	0.909	10	9	1.8	5.09	9.58e-05	9.06	9.65e-07	0.97
chr1-48	chr1	203973038	203973180	+	6.1	0.833	Intergenic	Intergenic	37283	37283	NR_027902	284573	Hs.406979	NR_027902		LINC00303	LINC00303	C1orf157|NCRNA00303	long intergenic non-protein coding RNA 303	miscRNA	6.1	0.833	13	13	2	6.43	2.36e-07	8.51	9.59e-09	0.96
chr21-93	chr21	31584729	31584869	+	4.8	0.769	promoter-TSS (NR_038855)	promoter-TSS (NR_038855)	-698	698	NR_038855	266919	Hs.561028	NR_038855		LINC00307	LINC00307	D21S2091E|NCRNA00307	long intergenic non-protein coding RNA 307	miscRNA	4.8	0.769	9	9	1.8	5.09	9.58e-05	8.45	1.87e-06	0.97
chr2-87	chr2	64440169	64440311	+	4.7	0.8	Intergenic	Intergenic	-7621	7621	NR_033837	150992	Hs.272318	NR_033837		LINC00309	LINC00309	NCRNA00309	long intergenic non-protein coding RNA 309	miscRNA	4.7	0.8	12	10	2	4.94	5.11e-05	5.98	1.03e-05	0.97
chr21-31	chr21	29602444	29602584	+	5.8	0.812	Intergenic	Intergenic	216832	216832	NR_027246	246705	Hs.505079	NM_145180		LINC00314	LINC00314	C21orf94|NCRNA00314	long intergenic non-protein coding RNA 314	miscRNA	5.8	0.812	11	11	2	5.53	7.92e-06	7.6	3.93e-07	0.97
chr13-78	chr13	45385446	45385586	+	4.8	0.733	Intergenic	Intergenic	-1750	1750	NR_038433	144817	Hs.585616	NR_038433		LINC00330	LINC00330	NCRNA00330	long intergenic non-protein coding RNA 330	miscRNA	4.8	0.733	9	9	1.8	5.09	9.58e-05	7.37	5.58e-06	0.97
chr6-113	chr6	33557674	33557816	+	4.7	0.611	TTS (NR_028361)	TTS (NR_028361)	3370	3370	NR_027908	401253	Hs.520075	NM_207497		LINC00336	LINC00336	C6orf227|NCRNA00336	long intergenic non-protein coding RNA 336	miscRNA	4.7	0.611	11	10	2	4.94	5.11e-05	6.81	3.42e-06	0.97
chr13-54	chr13	111530353	111530495	+	4.7	0.917	TTS (NM_017664)	TTS (NM_017664)	-7769	7769	NR_027701	283487	Hs.245390	NM_178514		LINC00346	LINC00346	C13orf29|NCRNA00346	long intergenic non-protein coding RNA 346	miscRNA	4.7	0.917	11	10	2	4.94	5.11e-05	6.74	3.73e-06	0.97
[truncated: 1,768 more rows]
